# Supplementary material
Source: PubMed Central journal article supplement (PMC8525427)
Supplement: NIHMS1709387-supplement-Supplement1.pdf [file NIHMS1709387-supplement-Supplement1.pdf]

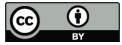

*Supplement of*

## **The Community Multiscale Air Quality (CMAQ) model versions 5.3 and 5.3.1: system updates and evaluation**

**K. Wyatt Appel et al.**

*Correspondence to:* K. Wyatt Appel ([appel.wyatt@epa.gov](mailto:appel.wyatt@epa.gov))

The copyright of individual parts of the supplement might differ from the article licence.

Table S1. New species introduced in AERO7 compared to AERO6. Species 1-21 are new to AERO7i. Other species in AERO7i (including species 22-24) previously existed in AERO6i. All gas-phase semi-volatiles use species-specific wet and dry deposition surrogates. Note that underscores are no longer used in species names in any aerosol or non-reactives namelist. For example, SV\_ISO1 is now SVISO1 in the non-reactives namelist (i.e. NR\*.nml) in CMAQ.

|   | Species | Phase    | Description                                                                                                                    | Scientific Basis                                                     | Model Implementation        |
|---|---------|----------|--------------------------------------------------------------------------------------------------------------------------------|----------------------------------------------------------------------|-----------------------------|
| 1 | AMT1J   | particle | low volatility particulate matter from monoterpene photooxidation (OH and O <sub>3</sub> reaction), C*=0.01 μg m <sup>-3</sup> | dark α-pinene ozonolysis (Saha and Grieshop, 2016, <i>ES&amp;T</i> ) | Xu et al., 2018, <i>ACP</i> |
| 2 | AMT2J   | particle | low volatility particulate matter from monoterpene photooxidation (OH and O <sub>3</sub> reaction), C*=0.1 μg m <sup>-3</sup>  | dark α-pinene ozonolysis (Saha and Grieshop, 2016, <i>ES&amp;T</i> ) | Xu et al., 2018, <i>ACP</i> |
| 3 | AMT3J   | particle | semivolatile particulate matter from monoterpene photooxidation (OH and O <sub>3</sub> reaction), C*=1 μg m <sup>-3</sup>      | dark α-pinene ozonolysis (Saha and Grieshop, 2016, <i>ES&amp;T</i> ) | Xu et al., 2018, <i>ACP</i> |
| 4 | AMT4J   | particle | semivolatile particulate matter from monoterpene photooxidation (OH and O <sub>3</sub> reaction), C*=10 μg m <sup>-3</sup>     | dark α-pinene ozonolysis (Saha and Grieshop, 2016, <i>ES&amp;T</i> ) | Xu et al., 2018, <i>ACP</i> |
| 5 | AMT5J   | particle | semivolatile particulate matter from monoterpene photooxidation (OH and O <sub>3</sub> reaction), C*=100 μg m <sup>-3</sup>    | dark α-pinene ozonolysis (Saha and Grieshop, 2016, <i>ES&amp;T</i> ) | Xu et al., 2018, <i>ACP</i> |
| 6 | AMT6J   | particle | semivolatile particulate matter from monoterpene photooxidation (OH and O <sub>3</sub> reaction), C*=1000 μg m <sup>-3</sup>   | dark α-pinene ozonolysis (Saha and Grieshop, 2016, <i>ES&amp;T</i> ) | Xu et al., 2018, <i>ACP</i> |
| 7 | SVMT1   | gas      | low volatility gas from monoterpene photooxidation (OH and O <sub>3</sub> reaction), C*=0.01 μg m <sup>-3</sup>                | dark α-pinene ozonolysis (Saha and Grieshop, 2016, <i>ES&amp;T</i> ) | Xu et al., 2018, <i>ACP</i> |
| 8 | SVMT2   | gas      | low volatility gas from monoterpene photooxidation (OH and O <sub>3</sub> reaction), C*=0.1 μg m <sup>-3</sup>                 | dark α-pinene ozonolysis (Saha and Grieshop, 2016, <i>ES&amp;T</i> ) | Xu et al., 2018, <i>ACP</i> |
| 9 | SVMT3   | gas      | semivolatile gas from monoterpene photooxidation (OH and O <sub>3</sub> reaction), C*=1 μg m <sup>-3</sup>                     | dark α-pinene ozonolysis (Saha and Grieshop, 2016, <i>ES&amp;T</i> ) | Xu et al., 2018, <i>ACP</i> |



|    | Species  | Phase    | Description                                                                                                              | Scientific Basis                                                                                                                                                                                                                                                                                | Model Implementation         |
|----|----------|----------|--------------------------------------------------------------------------------------------------------------------------|-------------------------------------------------------------------------------------------------------------------------------------------------------------------------------------------------------------------------------------------------------------------------------------------------|------------------------------|
| 10 | SVMT4    | gas      | semivolatile gas from monoterpene photooxidation (OH and O <sub>3</sub> reaction), C*=10 µg m <sup>-3</sup>              | dark α-pinene ozonolysis (Saha and Grieshop, 2016, <i>ES&amp;T</i> )                                                                                                                                                                                                                            | Xu et al., 2018, <i>ACP</i>  |
| 11 | SVMT5    | gas      | semivolatile gas from monoterpene photooxidation (OH and O <sub>3</sub> reaction), C*=100 µg m <sup>-3</sup>             | dark α-pinene ozonolysis (Saha and Grieshop, 2016, <i>ES&amp;T</i> )                                                                                                                                                                                                                            | Xu et al., 2018, <i>ACP</i>  |
| 12 | SVMT6    | gas      | semivolatile gas from monoterpene photooxidation (OH and O <sub>3</sub> reaction), C*=1000 µg m <sup>-3</sup>            | dark α-pinene ozonolysis (Saha and Grieshop, 2016, <i>ES&amp;T</i> )                                                                                                                                                                                                                            | Xu et al., 2018, <i>ACP</i>  |
| 13 | AORGH2OJ | particle | water associated with organic species of particulate matter                                                              | hygroscopicity parameters (Petters and Kreidenweis, 2007, <i>ACP</i> ) as a function of degree of oxygenation (Lambe et al., 2011, <i>ACP</i> )                                                                                                                                                 | Pye et al., 2017, <i>ACP</i> |
| 14 | AAVB1J   | particle | low volatility organic particulate matter from oxidation of anthropogenic VOCs (benzene, toluene, xylene, PAHs, alkanes) | GEOS-Chem VBS parameterization (Pye et al., 2010, <i>ACP</i> ) for aromatics and PAHs with long-chain alkanes following Pye and Pouliot (2012, <i>ES&amp;T</i> ) but with Presto et al. (2010, <i>ES&amp;T</i> ) VBS fits; all underlying experimental datasets are the same as in <i>aerob</i> | Qin et al., <i>in prep.</i>  |
| 15 | AAVB2J   | particle | semivolatile organic particulate matter from oxidation of anthropogenic VOCs (benzene, toluene, xylene, PAHs, alkanes)   | see AAVB1J                                                                                                                                                                                                                                                                                      | Qin et al., <i>in prep.</i>  |
| 16 | AAVB3J   | particle | semivolatile organic particulate matter from oxidation of anthropogenic VOCs (benzene, toluene, xylene, PAHs, alkanes)   | see AAVB1J                                                                                                                                                                                                                                                                                      | Qin et al., <i>in prep.</i>  |
| 17 | AAVB4J   | particle | semivolatile organic particulate matter from oxidation of anthropogenic VOCs (benzene, toluene, xylene, PAHs, alkanes)   | see AAVB1J                                                                                                                                                                                                                                                                                      | Qin et al., <i>in prep.</i>  |

|    | Species | Phase    | Description                                                                                               | Scientific Basis                                                                                                                                       | Model Implementation              |
|----|---------|----------|-----------------------------------------------------------------------------------------------------------|--------------------------------------------------------------------------------------------------------------------------------------------------------|-----------------------------------|
| 18 | SVAVB1  | gas      | low volatility organic gas from oxidation of anthropogenic VOCs (benzene, toluene, xylene, PAHs, alkanes) | see AAVB1J                                                                                                                                             | Qin et al., <i>in prep.</i>       |
| 19 | SVAVB2  | gas      | semivolatile organic gas from oxidation of anthropogenic VOCs (benzene, toluene, xylene, PAHs, alkanes)   | see AAVB1J                                                                                                                                             | Qin et al., <i>in prep.</i>       |
| 20 | SVAVB3  | gas      | semivolatile organic gas from oxidation of anthropogenic VOCs (benzene, toluene, xylene, PAHs, alkanes)   | see AAVB1J                                                                                                                                             | Qin et al., <i>in prep.</i>       |
| 21 | SVAVB4  | gas      | semivolatile organic gas from oxidation of anthropogenic VOCs (benzene, toluene, xylene, PAHs, alkanes)   | see AAVB1J                                                                                                                                             | Qin et al., <i>in prep.</i>       |
| 22 | MTNO3   | gas      | organic nitrates from monoterpene oxidation                                                               | gas-phase SAPRC yields (should not be counted as gas-phase organic nitrate for evaluation purposes in CB6r3 mechanisms)                                | Pye et al., 2015, <i>ES&amp;T</i> |
| 23 | AMTNO3J | particle | semivolatile organic nitrates from monoterpene oxidation                                                  | Fry et al. (2009, <i>ACP</i> ) for vapor pressure of monoterpene organic nitrates                                                                      | Pye et al., 2015, <i>ES&amp;T</i> |
| 24 | AMTHYDJ | particle | organic pseudo-hydrolysis accretion product from monoterpene organic nitrates (AMTNO3J)                   | Boyd et al. (2015, <i>ACP</i> ) for hydrolysis timescale for tertiary nitrates, but applied to all MTNO3 following Pye et al. (2015, <i>ES&amp;T</i> ) | Pye et al., 2015, <i>ES&amp;T</i> |

\*Species in AERO6/6i that are deprecated in AERO7/7i (these species should NOT appear in an AERO7/7i namelist): ATRP1J, ATRP2J, SV\_TRP1, SV\_TRP2, ABNZ1J, ABNZ2J, ABNZ3J, SV\_BNZ1, SV\_BNZ2, AXYL1J, AXYL2J, AXYL3J, SV\_XYL1, SV\_XYL2, ATOL1J, ATOL2J, ATOL3J, SV\_TOL1, SV\_TOL2, APAH1J, APAH2J, APAH3J, SV\_PAH1, SV\_PAH2, AALK1J, AALK2J, SV\_ALK1, SV\_ALK2

Table S2. Namelist options used for WRF version 3.8 simulation.

```

&time_control
start_year      = 2015,
start_month     = 12,
start_day       = 21,
start_hour      = 00,
start_minute    = 00,
start_second    = 00,
end_year        = 2015,
end_month       = 12,
end_day         = 27,
end_hour        = 00,
end_minute      = 01,
end_second      = 00,
interval_seconds = 10800,
input_from_file = .true.,
history_interval = 60,
frames_per_outfile = 24,
restart         = .FALSE.,
restart_interval = 1440,
io_form_history = 2
io_form_restart = 2
io_form_input   = 2
io_form_boundary = 2
debug_level     = 0
io_form_auxinput2 = 2
io_form_auxinput4 = 2
auxinput1_inname = "metoa_em.d01.<date>"
auxinput4_inname = "wrflowinp_d01"
auxinput4_interval = 180
auxinput4_end_h   = 9025
write_hist_at_0h_rst = .true.,
io_form_auxinput8 = 2,
auxinput8_inname = 'LTNG_<year>_<month>.nc',
frames_per_auxinput8 = 1600,
auxinput8_interval_m = 30,
auxinput8_end_h     = 9999,
/

&domains
time_step          = 60,
time_step_fract_num = 0,
time_step_fract_den = 1,
use_adaptive_time_step = .false.
max_dom            = 1,
s_we               = 1,
e_we               = 472,
s_sn               = 1,
e_sn               = 312,
s_vert             = 1,
e_vert             = 36,
p_top_requested    = 5000,
eta_levels         = 1.000, 0.9975, 0.995, 0.990, 0.985,
                   0.980, 0.970, 0.960, 0.950,
                   0.940, 0.930, 0.920, 0.910,

```

```

0.900, 0.880, 0.860, 0.840,
0.820, 0.800, 0.770, 0.740,
0.700, 0.650, 0.600, 0.550,
0.500, 0.450, 0.400, 0.350,
0.300, 0.250, 0.200, 0.150,
0.100, 0.050, 0.000
num_metgrid_levels      = 40,
dx                      = 12000,
dy                      = 12000,
grid_id                 = 1,
parent_id               = 0,
i_parent_start         = 0,
j_parent_start         = 0,
parent_grid_ratio       = 1,
parent_time_step_ratio = 1,
feedback                = 1,
smooth_option          = 0,
/

&physics
mp_physics              = 10,
ra_lw_physics           = 4,
ra_sw_physics           = 4,
radt                    = 20,
sf_sfclay_physics      = 7,
sf_surface_physics     = 7,
bl_pbl_physics         = 7,
bldt                    = 0,
cu_physics              = 1,
kfeta_trigger           = 1,
cudt                    = 10,
ltg_assim               = .true.,
suppress_opt            = 2,
isfflx                  = 1,
ifsnow                  = 1,
icloud                  = 1,
cu_rad_feedback         = .true.,
surface_input_source    = 1,
num_soil_layers         = 2,
sst_update              = 1,
pxlsm_smois_init       = 1,
slope_rad               = 1,
topo_shading            = 1,
shadlen                 = 25000.,
num_land_cat            = 40,
prec_acc_dt             = 60,
mp_zero_out             = 2,
fractional_seaice       = 1,
seaice_threshold        = 0.0,
/

&fdda
grid_fdda               = 1,
grid_sfdda              = 1,
pxlsm_soil_nudge        = 1,
sgfdda_inname           = "wrfsfdda_d01",

```

```

sgfdda_end_h           = 9025,
sgfdda_interval_m     = 180,
sgfdda_interval       = 10800,
gfdda_inname          = "wrffdda_d<domain>",
gfdda_end_h           = 9025,
gfdda_interval_m     = 180,
fgdt                   = 0,
if_no_pbl_nudging_uv = 1,
if_no_pbl_nudging_t   = 1,
if_no_pbl_nudging_q   = 1,
if_zfac_uv            = 0,
k_zfac_uv             = 13,
if_zfac_t             = 0,
k_zfac_t              = 13,
if_zfac_q             = 0,
k_zfac_q              = 13,
guv                   = 0.0001,
gt                    = 0.0001,
gq                    = 0.00001,
guv_sfc               = 0.0000,
gt_sfc                = 0.0000,
gq_sfc                = 0.0000,
if_ramping            = 0,
dtramp_min            = 60.0,
io_form_gfdda         = 2,
rinblw                = 250.0
/

```

```

&dynamics
w_damping              = 1,
diff_opt               = 1,
km_opt                 = 4,
diff_6th_opt           = 2,
diff_6th_factor        = 0.12,
damp_opt               = 3,
base_temp              = 290.
zdamp                  = 5000.,
dampcoef               = 0.05,
khdif                  = 0,
kvdif                  = 0,
non_hydrostatic        = .true.,
moist_adv_opt          = 2,
tke_adv_opt            = 2,
scalar_adv_opt         = 2,
/

```

```

&dfi_control
dfi_opt                = 0
dfi_nfilter            = 7
dfi_write_filtered_input = .true.
dfi_write_dfi_history  = .false.
dfi_cutoff_seconds     = 60
dfi_time_dim           = 1000
dfi_bckstop_year       = 2006
dfi_bckstop_month      = 08
dfi_bckstop_day        = 04

```

```
dfi_bckstop_hour      = 12
dfi_bckstop_minute   = 00
dfi_bckstop_second    = 00
dfi_fwdstop_year      = 2006
dfi_fwdstop_month     = 08
dfi_fwdstop_day       = 04
dfi_fwdstop_hour      = 13
dfi_fwdstop_minute    = 00
dfi_fwdstop_second    = 00
/
```

```
&bdy_control
spec_bdy_width        = 5,
spec_zone              = 1,
relax_zone             = 4,
specified              = .true.,
nested                 = .false.,
/
```

```
&grib2
/
```

```
&namelist_quilt
nio_tasks_per_group = 0,
nio_groups = 1,
/
```

Table S3. Namelist options used in WRF version 4.1.1 simulation.

```

&time_control
start_year          = $YS
start_month         = $MS
start_day           = $DS
start_hour          = 00
start_minute        = 00,
start_second        = 00,
end_year            = $YE
end_month           = $ME
end_day             = $DE
end_hour            = 00
end_minute          = 00,
end_second          = 00,
interval_seconds    = 10800
input_from_file     = .true.,
history_interval    = 60,
frames_per_outfile  = 24,
restart              = .true.
restart_interval    = 1440,
write_hist_at_0h_rst = .true.,
io_form_history     = 2
io_form_restart     = 2
io_form_input       = 2
io_form_boundary    = 2
io_form_auxinput2   = 2
io_form_auxinput4   = 2
io_form_auxinput8   = 2,
debug_level         = 0
auxinput1_inname    = "met_em.d01.<date>"
auxinput4_inname    = "wrflowinp_d01"
auxinput4_interval  = 180
auxinput4_end_h     = 999999999
auxinput8_inname    = "LIGHTNING"
auxinput8_interval  = 30
auxinput8_end_h     = 999999999
frames_per_auxinput8 = 7344,
reset_simulation_start = .false.,
iofields_filename   = "output.var.txt"
force_use_old_data   = .true.
/

&domains
time_step           = 60,
time_step_fract_num = 0,
time_step_fract_den = 1,
max_dom             = 1,
s_we                = 1,
e_we                = 472,
s_sn                = 1,
e_sn                = 312,
s_vert              = 1,
e_vert              = 36,
p_top_requested     = 5000,
eta_levels          = 1.000, 0.9975, 0.995, 0.990, 0.985,

```

```

0.980, 0.970, 0.960, 0.950,
0.940, 0.930, 0.920, 0.910,
0.900, 0.880, 0.860, 0.840,
0.820, 0.800, 0.770, 0.740,
0.700, 0.650, 0.600, 0.550,
0.500, 0.450, 0.400, 0.350,
0.300, 0.250, 0.200, 0.150,
0.100, 0.050, 0.000
num_metgrid_levels      = 40,
dx                      = 12000,
dy                      = 12000,
grid_id                 = 1,
parent_id               = 0,
i_parent_start          = 0,
j_parent_start          = 0,
parent_grid_ratio       = 1,
parent_time_step_ratio = 1,
feedback                = 1,
smooth_option           = 0,
/

```

```

&physics
mp_physics              = 10,
mp_zero_out             = 2,
mp_zero_out_thresh     = 1.0e-8,
ra_lw_physics           = 4,
ra_sw_physics           = 4,
radt                   = 20,
co2tf                   = 1,
sf_sfclay_physics     = 7,
num_soil_layers        = 2,
pxlsm_smois_init       = 0,
pxlsm_modis_veg        = 1,
sf_surface_physics     = 7,
sf_urban_physics       = 0,
bl_pbl_physics         = 7,
bldt                   = 0,
cu_physics              = 1,
kfeta_trigger          = 1,
cudt                   = 0,
prec_acc_dt            = 60,
isfflx                 = 1,
ifsnow                 = 1,
icloud                 = 1,
cu_rad_feedback        = .true.,
surface_input_source   = 1,
num_land_cat           = 40,
num_soil_cat           = 16,
sst_update             = 1,
seaice_threshold       = 100,
slope_rad              = 1,
topo_shading           = 1,
shadlen                = 25000.,
do_radar_ref           = 1,
grav_settling          = 0,
ltg_assim              = .true.,

```



```

suppress_opt          = 2,
/

&fdda
grid_fdda             = 1,
grid_sfdda            = 1,
pxlsm_soil_nudge     = 1,
sgfdda_inname        = "wrfsfdda_d01",
sgfdda_end_h         = 999999999,
sgfdda_interval_m    = 180,
gfdda_inname         = "wrfdda_d<domain>",
gfdda_end_h          = 999999999,
gfdda_interval_m     = 180,
fgdt                 = 0,
if_no_pbl_nudging_uv = 1,
if_no_pbl_nudging_t  = 1,
if_no_pbl_nudging_q  = 1,
if_zfac_uv           = 0,
k_zfac_uv            = 13,
if_zfac_t            = 0,
k_zfac_t             = 13,
if_zfac_q            = 0,
k_zfac_q             = 13,
guv                  = 0.0001,
gt                   = 0.0001,
gq                   = 0.00001,
guv_sfc              = 0.0000,
gt_sfc               = 0.0000,
gq_sfc               = 0.0000,
if_ramping           = 1,
dtramp_min           = 60.0,
io_form_gfdda        = 2,
rinblw               = 250.0
/

&dynamics
hybrid_opt           = 2,
w_damping            = 1,
diff_opt             = 1,
km_opt               = 4,
diff_6th_opt         = 2,
diff_6th_factor      = 0.12,
damp_opt             = 3,
base_temp            = 290.
zdamp                = 5000.,
dampcoef             = 0.05,
khdif                = 0,
kvdif                = 0,
non_hydrostatic      = .true.,
moist_adv_opt        = 2,
tke_adv_opt          = 2,
scalar_adv_opt       = 2,
/

&bdy_control
spec_bdy_width       = 5,

```

```
spec_zone      = 1,  
relax_zone     = 4,  
specified      = .true.,  
spec_exp       = 0.0,  
nested        = .false.,  
/  

```

```
&grib2  
/  

```

```
&namelist_quilt  
nio_tasks_per_group = 0,  
nio_groups = 1,  

```

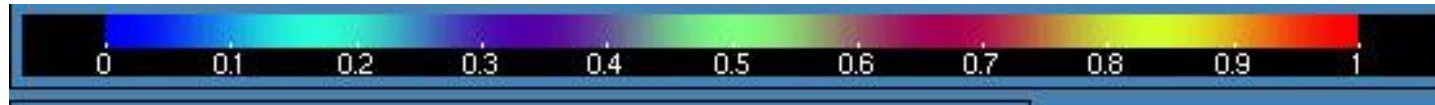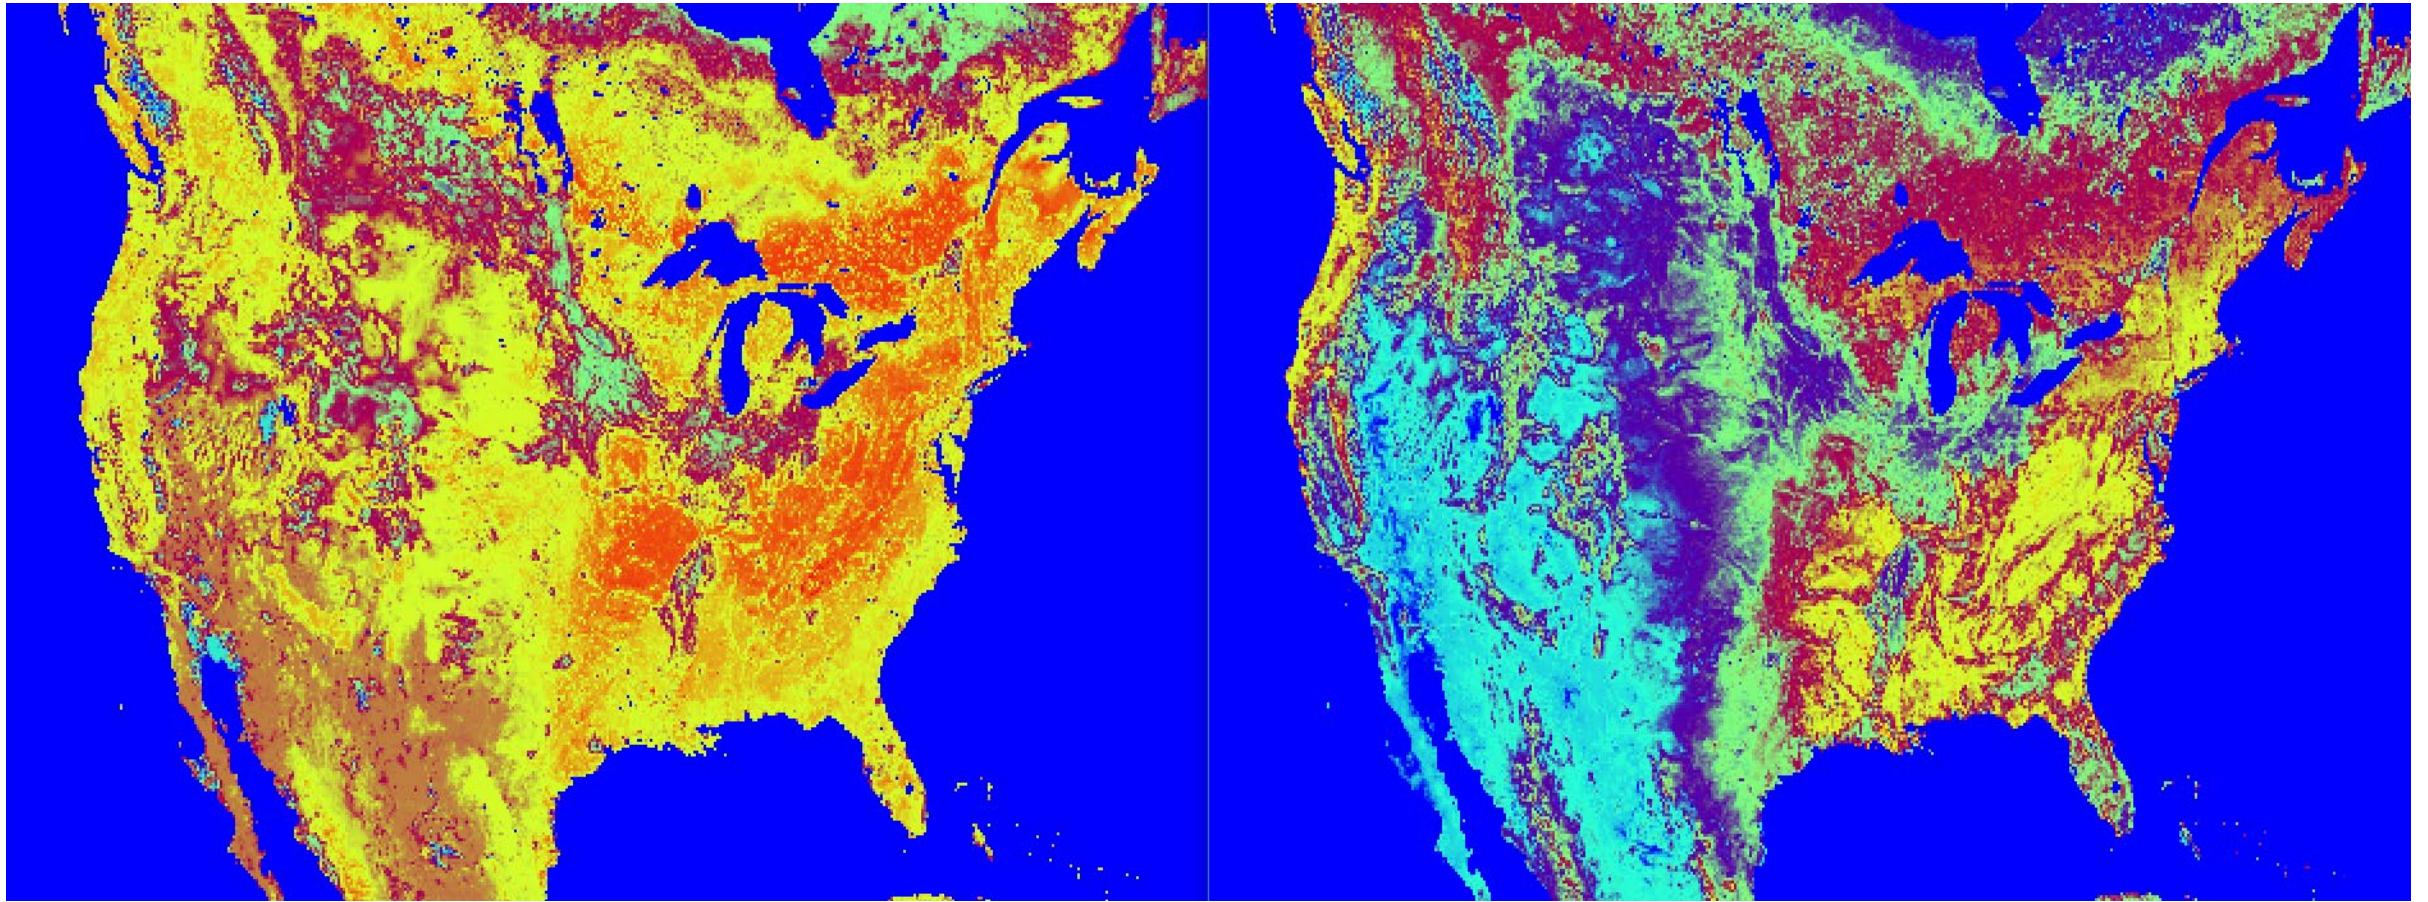

Figure S1. Vegetation Fraction (VF) on June 1, 2016 from WRF38 (left) and WRF411 (right).

## U.S. Climate Regions

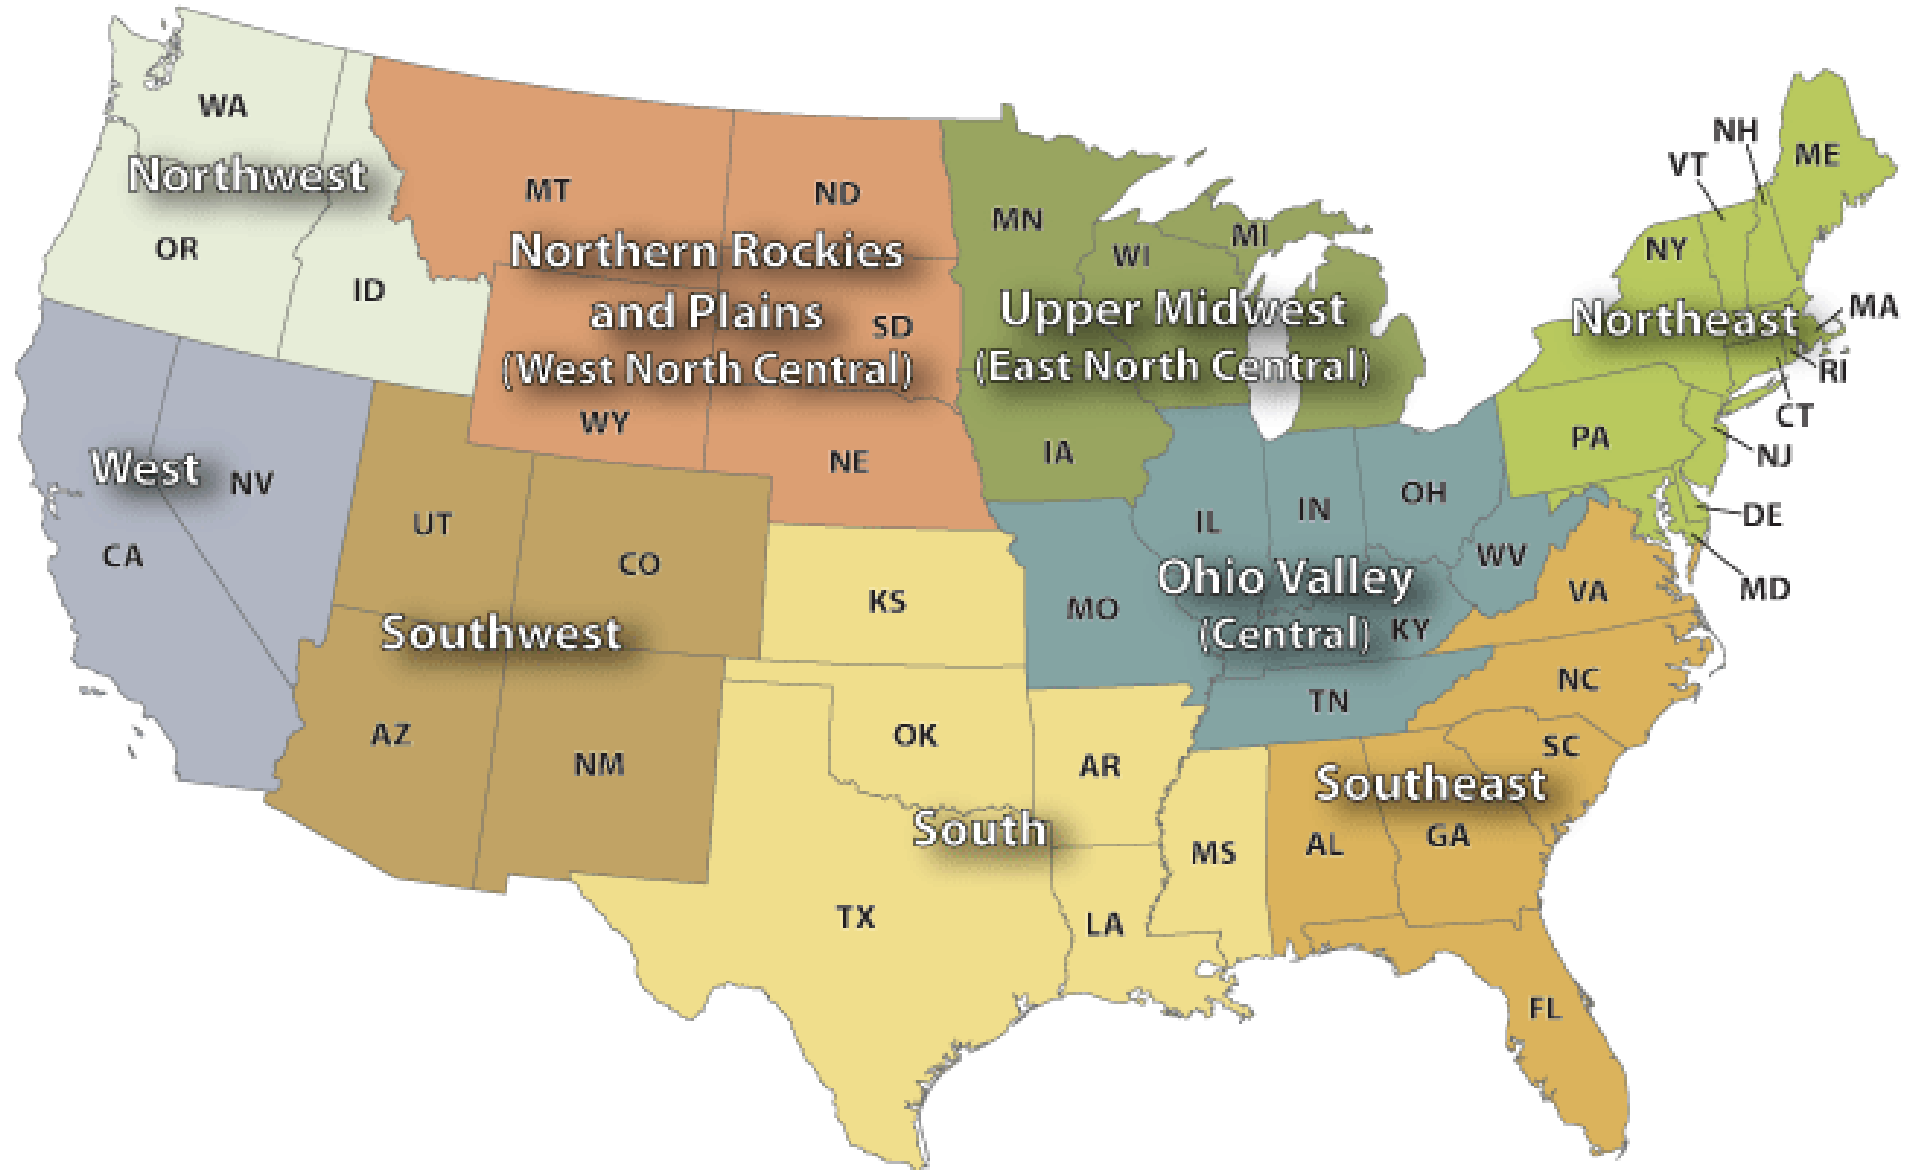

Figure S2. Map of the NOAA U.S. climate regions. Image source: <https://www.ncdc.noaa.gov/monitoring-references/maps/us-climate-regions.php>.

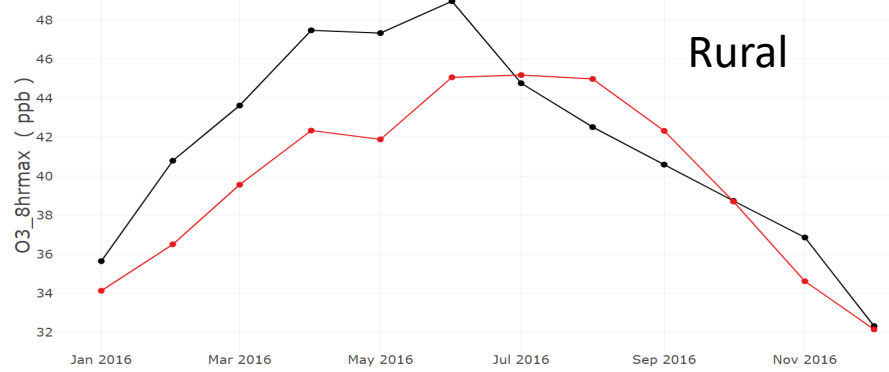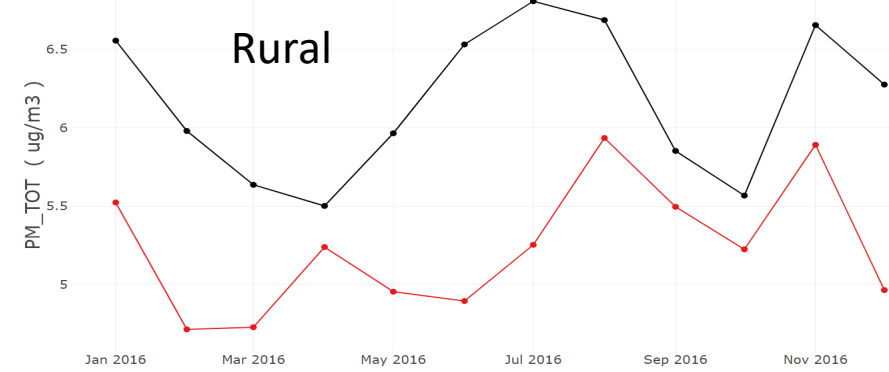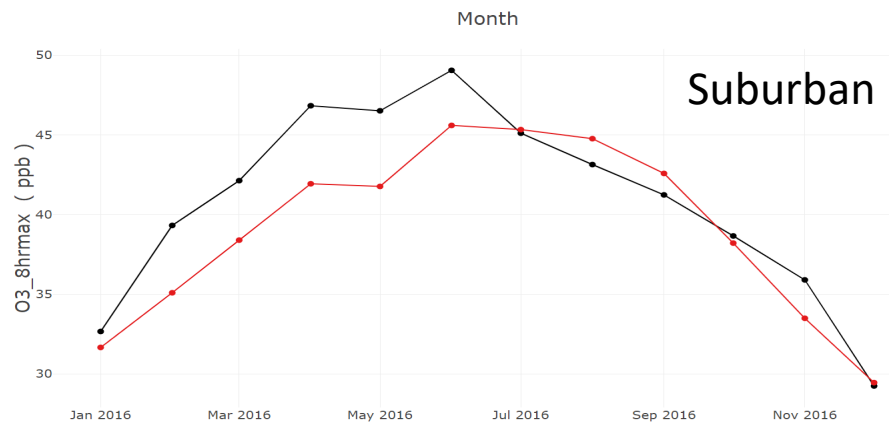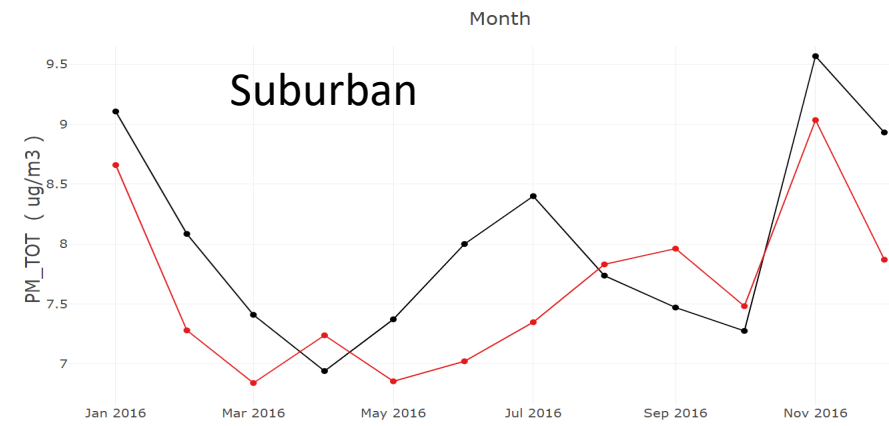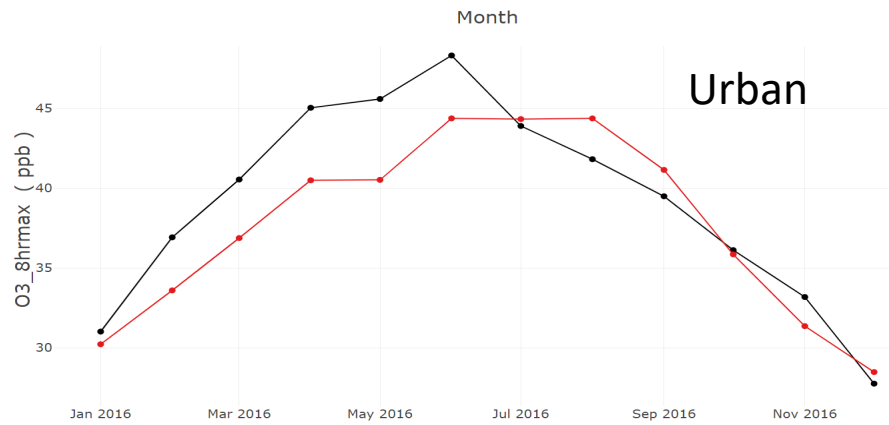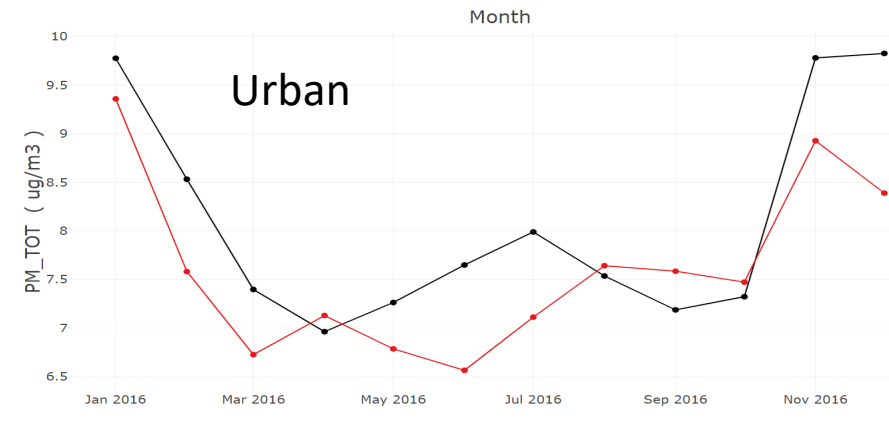

Figure S3. Time series of monthly averaged observed (black) and CMAQ simulated (red) MDA8 O<sub>3</sub> (left) and PM<sub>2.5</sub> (right) for rural (top), suburban (middle), and urban (bottom) AQS sites. Similar trends in observed and simulated monthly average values are seen for all three land-use classifications.



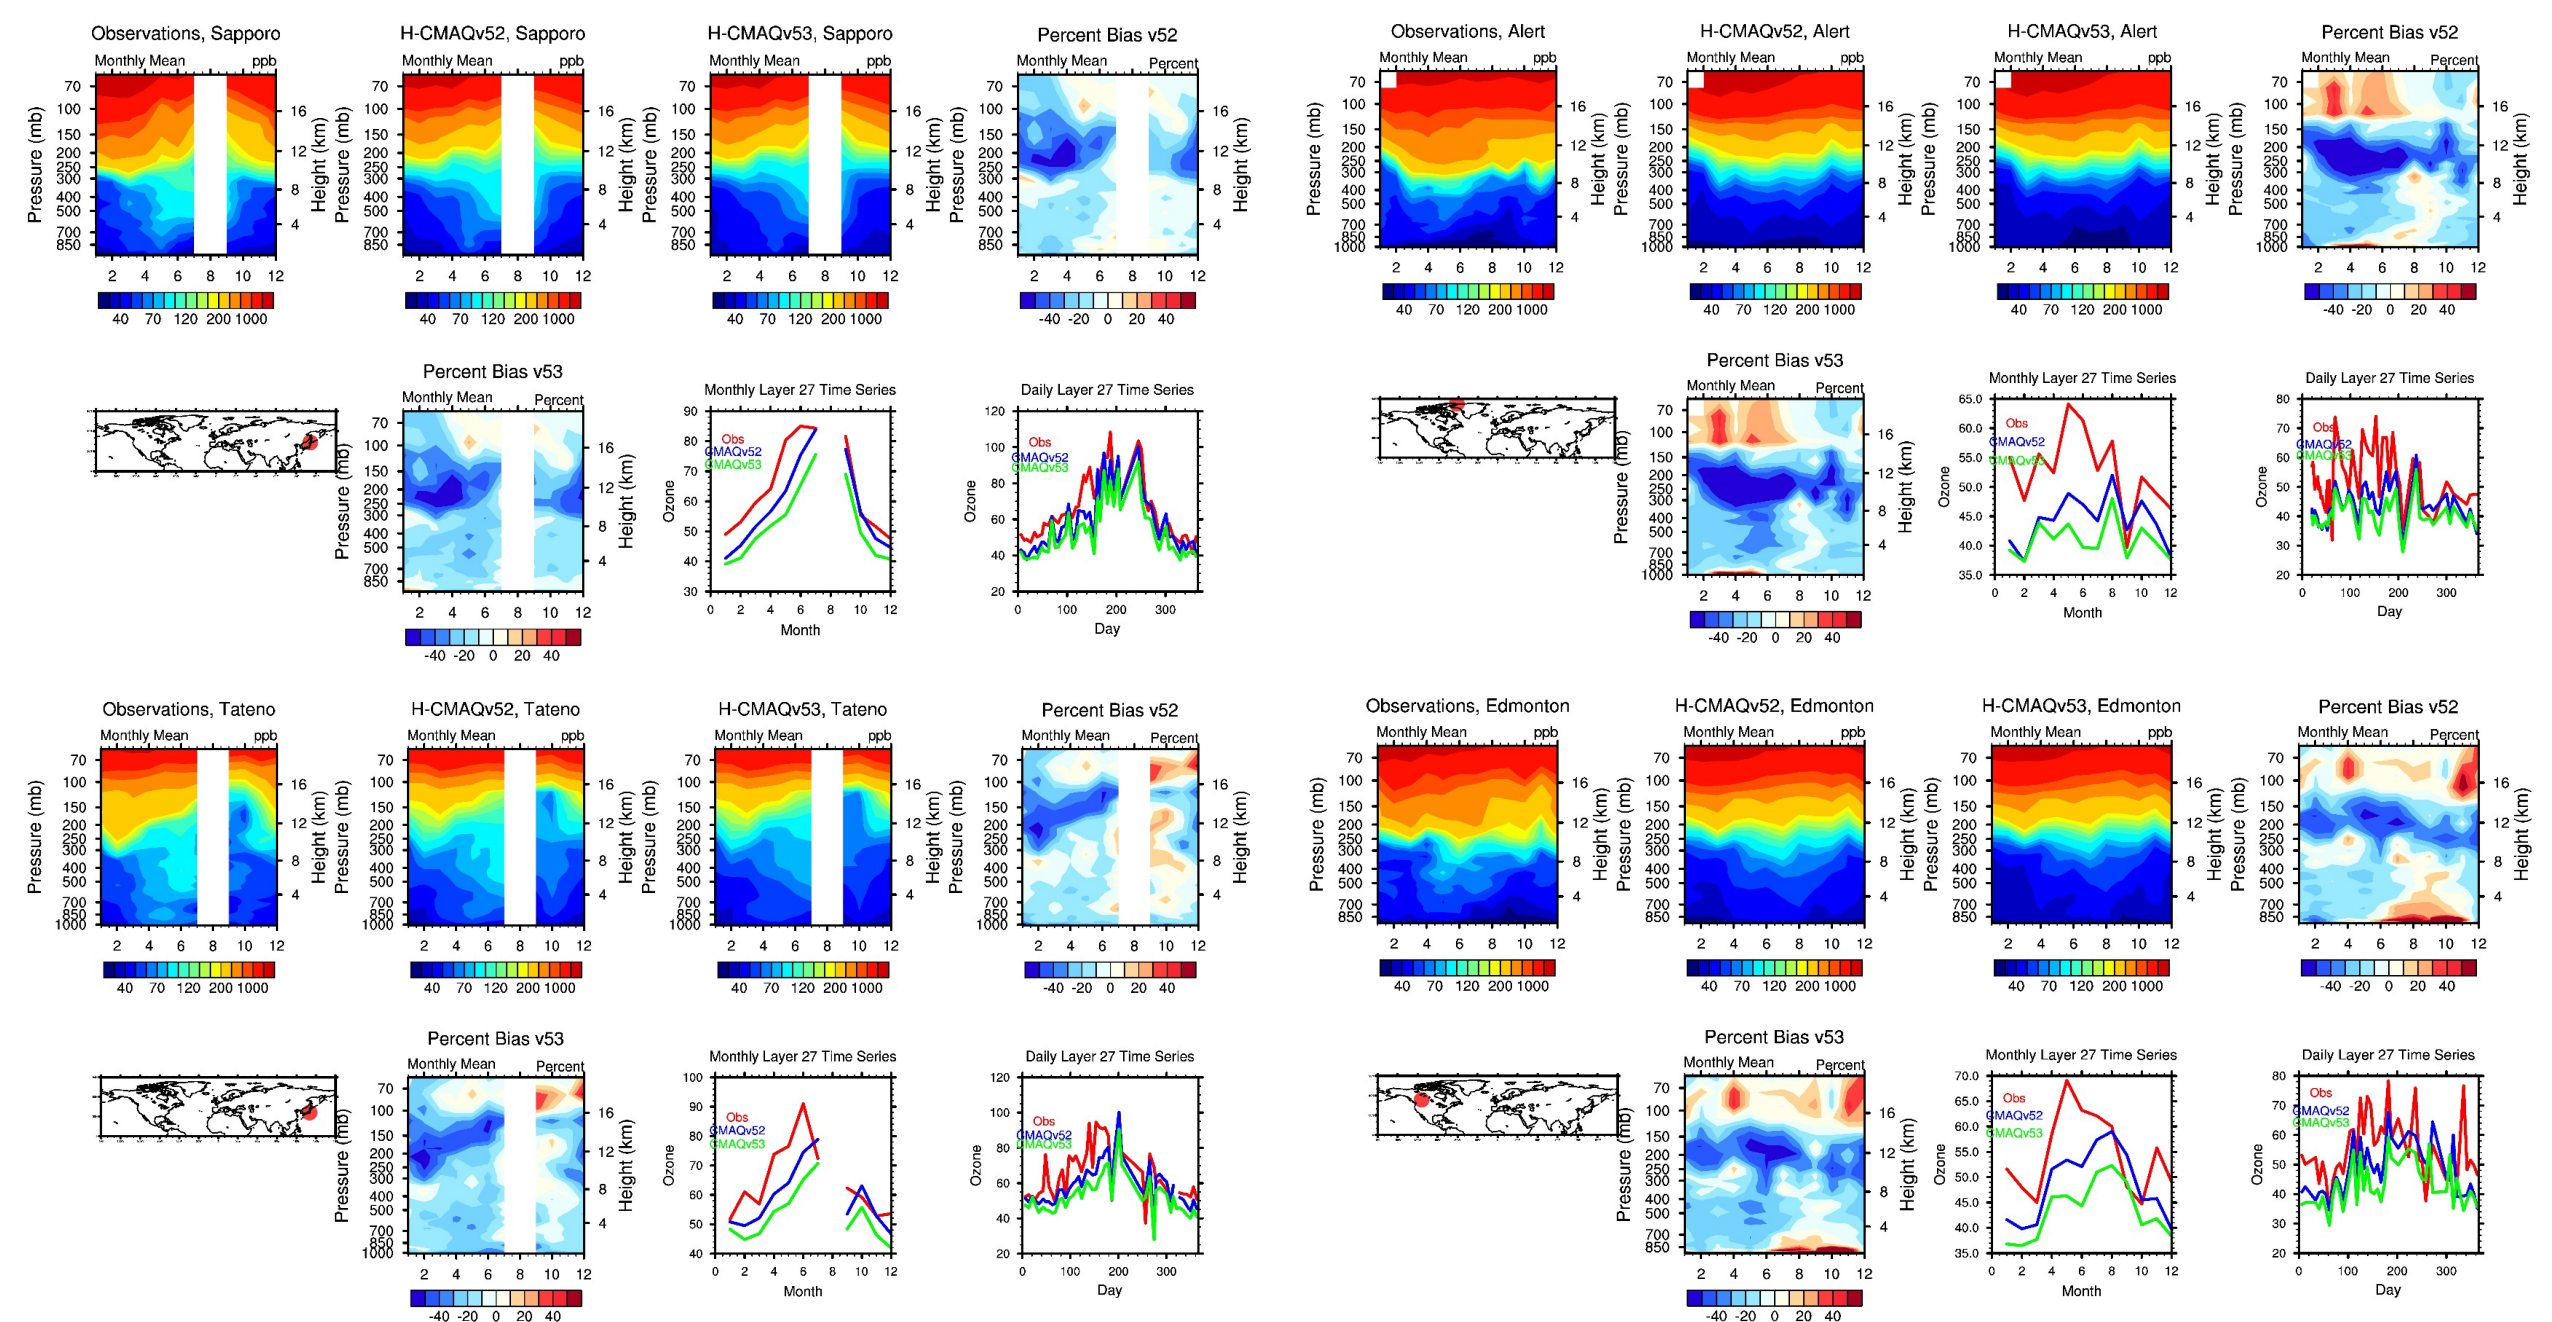

Figure S4. Comparison of ozonesonde data for the Sapporo, JP (upper left), Alert, GRL (upper right), Tateno, JP (lower left), and Edmonton, CA (lower right) WUODC sites. Each panel consists of eight plots: observed O<sub>3</sub> (ppbv; top far left); HCMAQ52 modeled O<sub>3</sub> (ppbv; top middle left); HCMAQ53 modeled O<sub>3</sub> (ppbv; top middle right); HCMAQ52 bias (%) top far right); approximate site location (bottom far left); HCMAQ53 bias (%) bottom middle left); layer 27 monthly average O<sub>3</sub> time series (ppbv; bottom middle right); layer 27 daily average O<sub>3</sub> time series (ppbv; bottom far right).



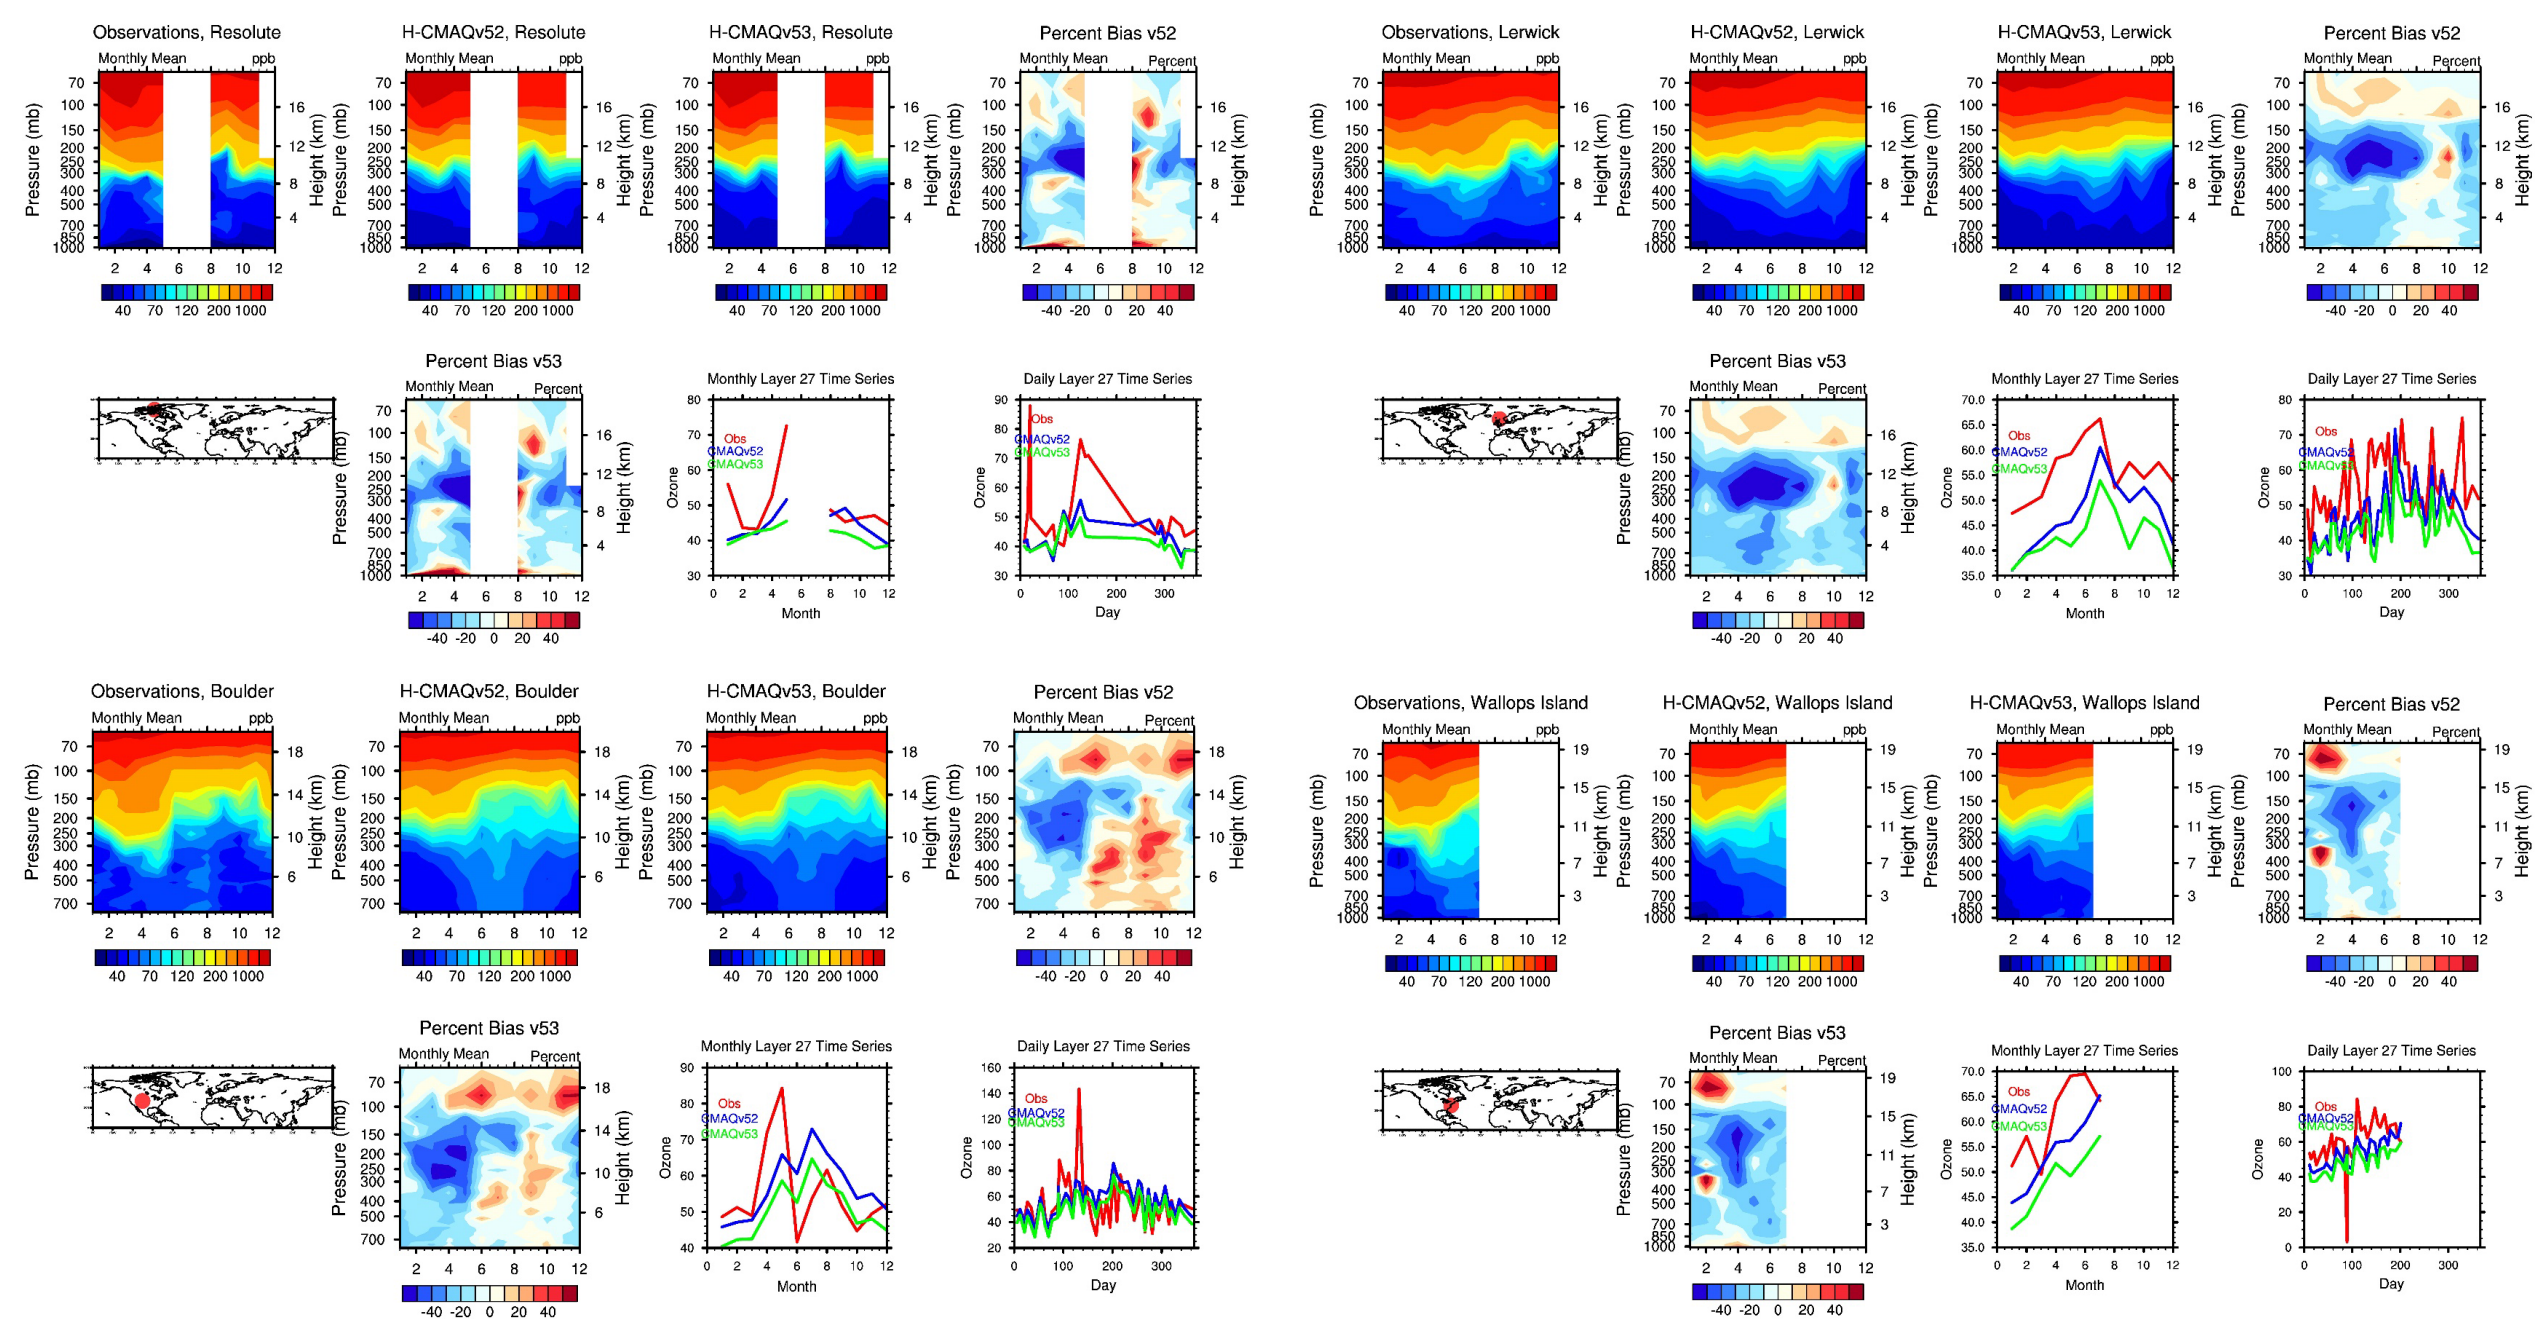

Figure S5. Comparison of ozonesonde data for the Resolute, CA (upper left), Lerwick, SCT (upper right), Boulder, US (lower left), and Wallops Island, US (lower right) WOUDC sites. Each panel consists of eight plots: observed  $O_3$  (ppbv; top far left); H-CMAQv52 modeled  $O_3$  (ppbv; top middle left); H-CMAQv53 modeled  $O_3$  (ppbv; top middle right); H-CMAQv52 bias (%) (top far right); approximate site location (bottom far left); H-CMAQv53 bias (%) (bottom middle left); layer 27 monthly average  $O_3$  time series (ppbv; bottom middle right); layer 27 daily average  $O_3$  time series (ppbv; bottom far right).



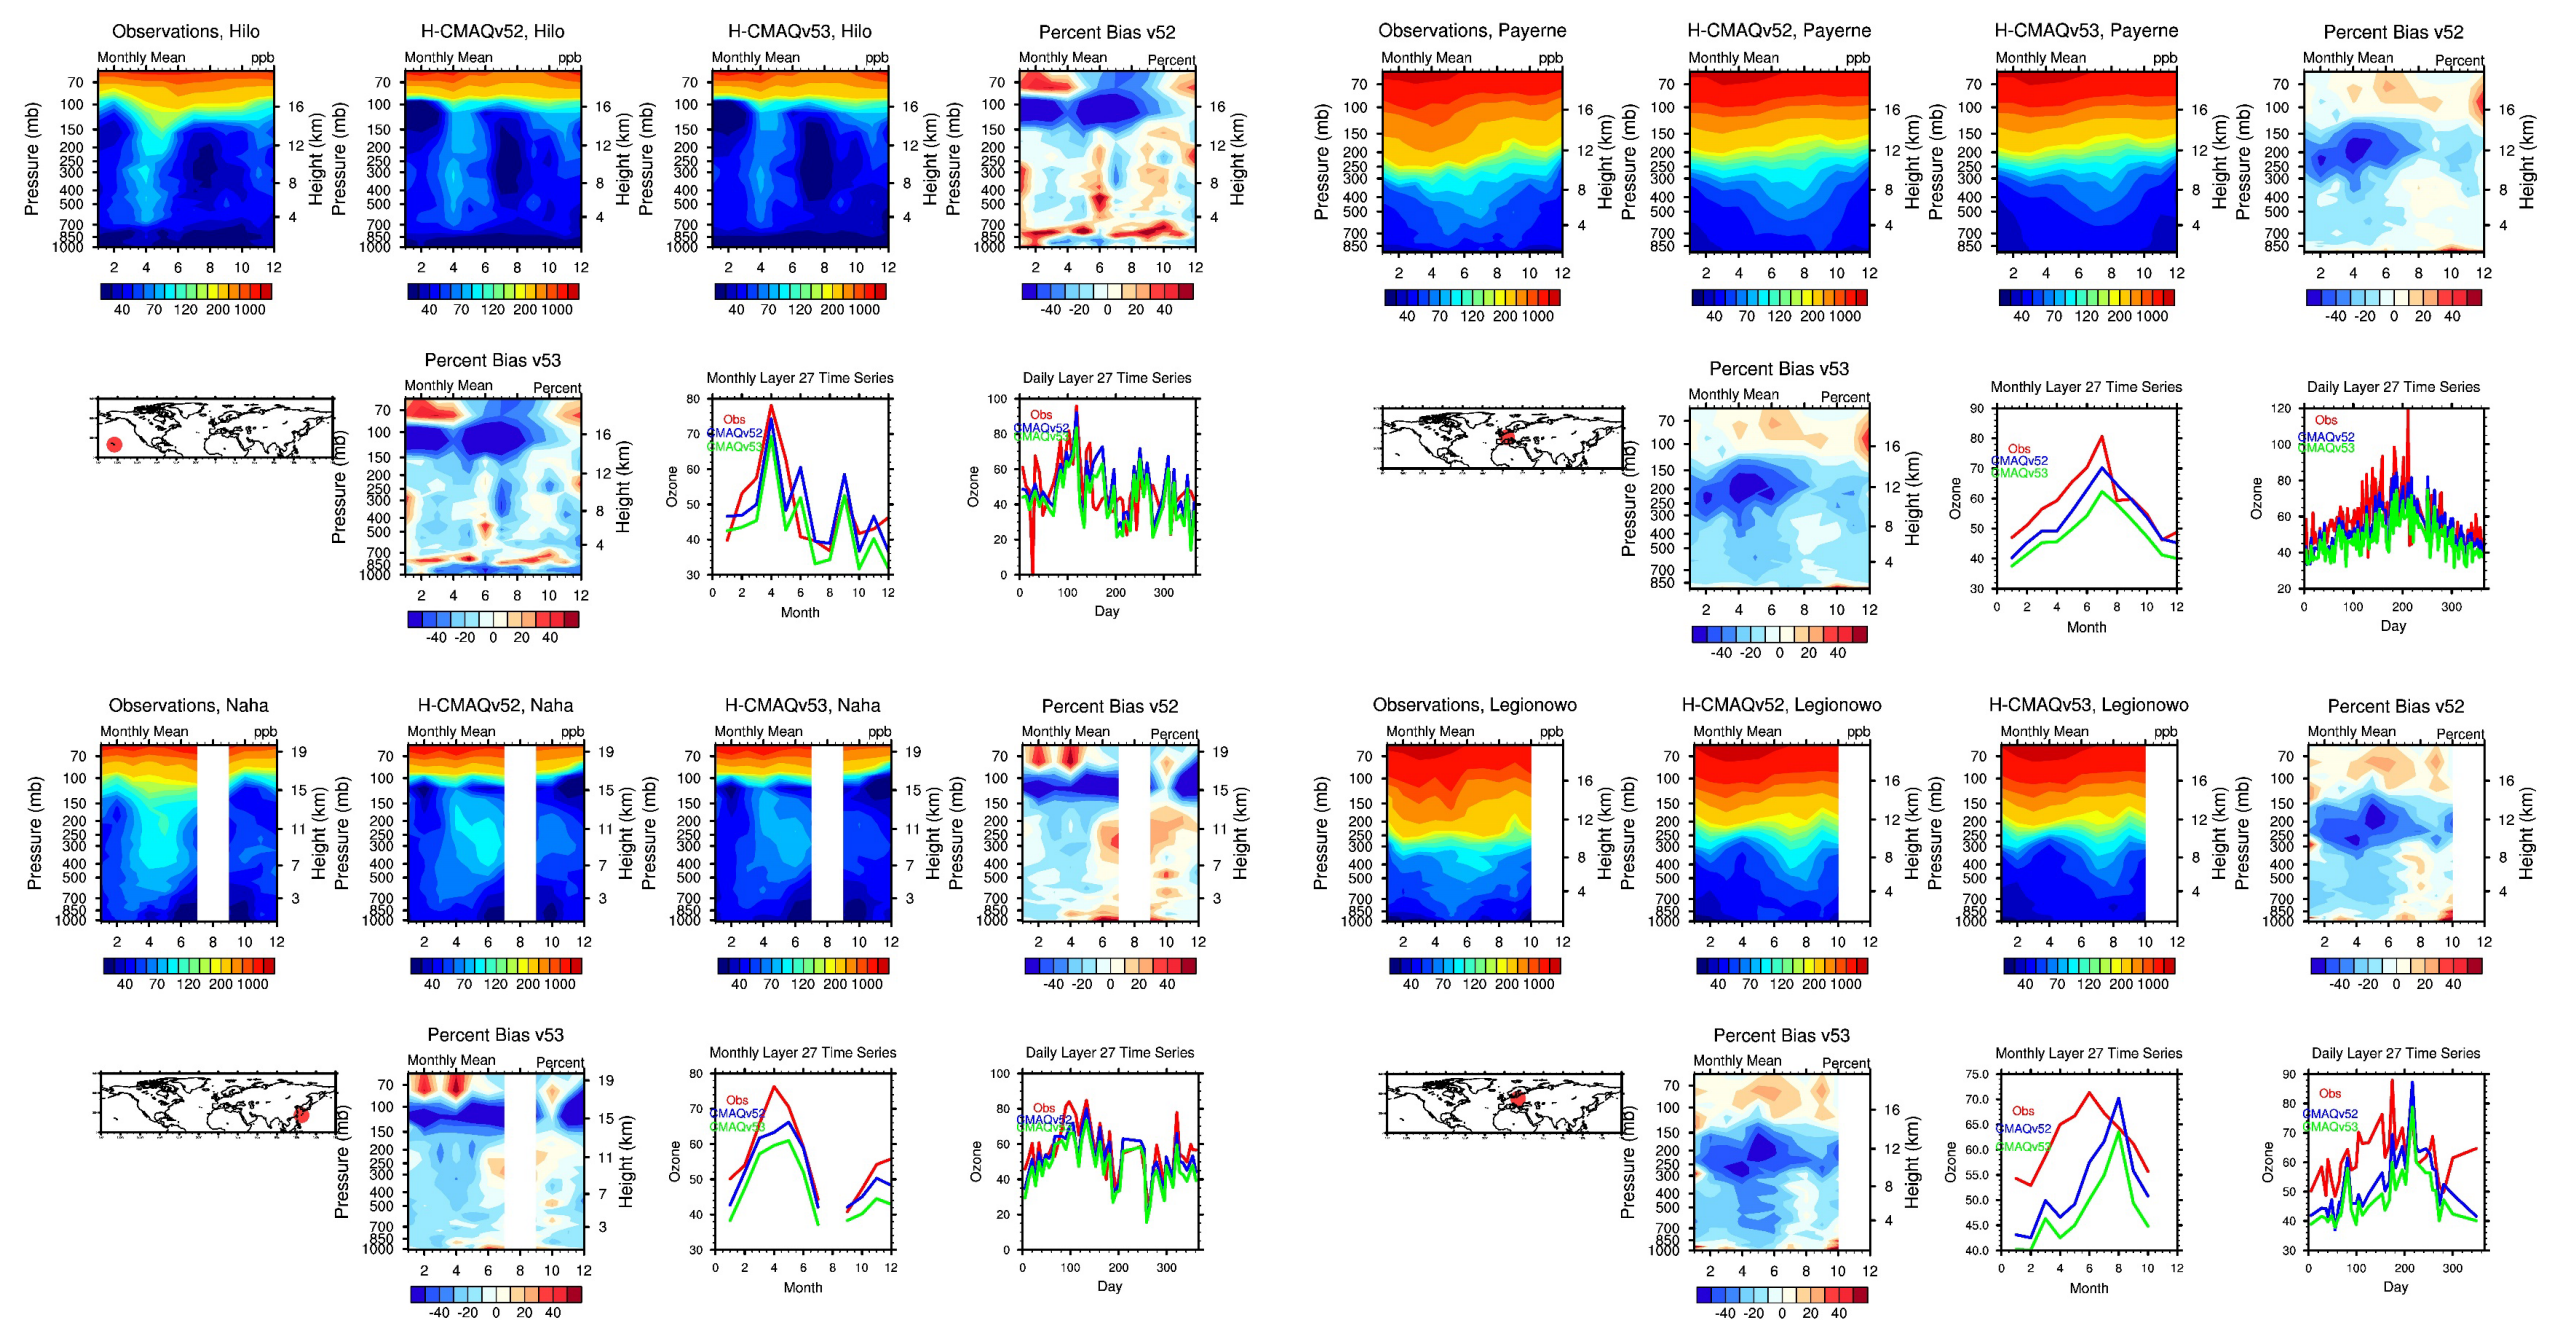

Figure S6. Comparison of ozonesonde data for the Hilo, US (upper left), Payerne, CH (upper right), Naha, JP (lower left), and Legionowo, PL (lower right) WOUDC sites. Each panel consists of eight plots: observed  $O_3$  (ppbv; top far left); HCMAQ52 modeled  $O_3$  (ppbv; top middle left); HCMAQ53 modeled  $O_3$  (ppbv; top middle right); HCMAQ52 bias (%; top far right); approximate site location (bottom far left); HCMAQ53 bias (%; bottom middle left); layer 27 monthly average  $O_3$  time series (ppbv; bottom middle right); layer 27 daily average  $O_3$  time series (ppbv; bottom far right).



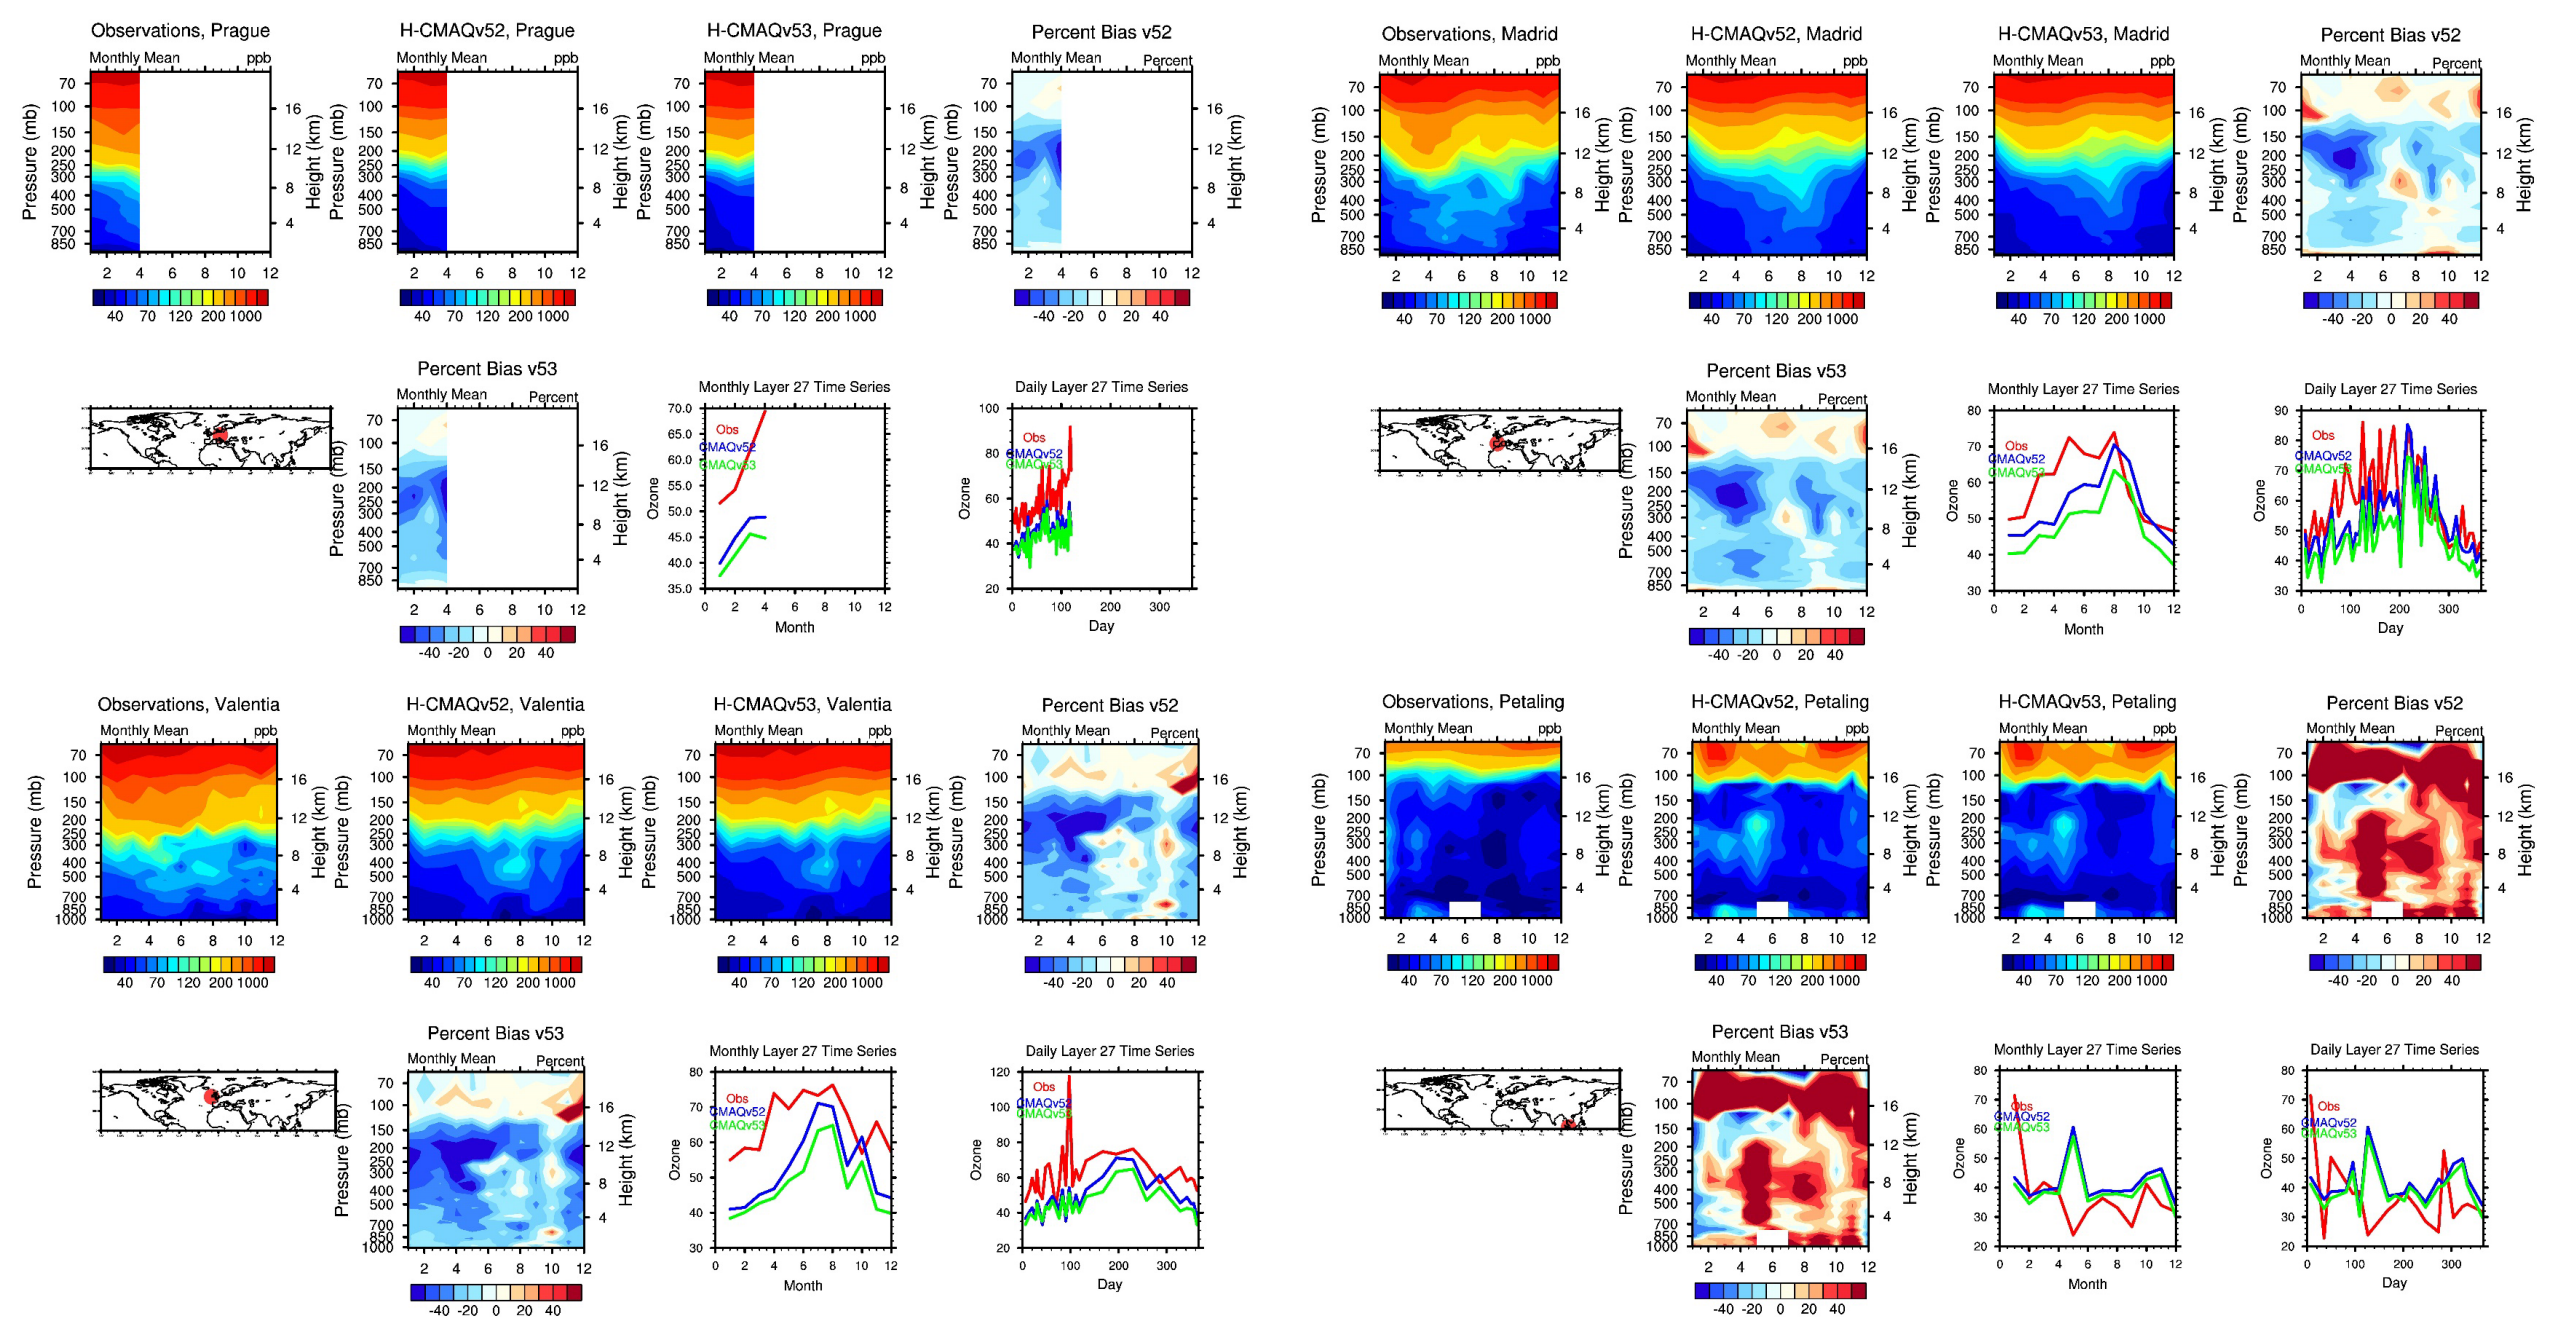

Figure S7. Comparison of ozonesonde data for the Prague, CZ (upper left), Madrid, SP (upper right), Valentia, SP (lower left), and Petaling, MY (lower right) WOUDC sites. Each panel consists of eight plots: observed O<sub>3</sub> (ppbv; top far left); HCMAQ52 modeled O<sub>3</sub> (ppbv; top middle left); HCMAQ53 modeled O<sub>3</sub> (ppbv; top middle right); HCMAQ52 bias (%) top far right); approximate site location (bottom far left); HCMAQ53 bias (%) bottom middle left); layer 27 monthly average O<sub>3</sub> time series (ppbv; bottom middle right); layer 27 daily average O<sub>3</sub> time series (ppbv; bottom far right).



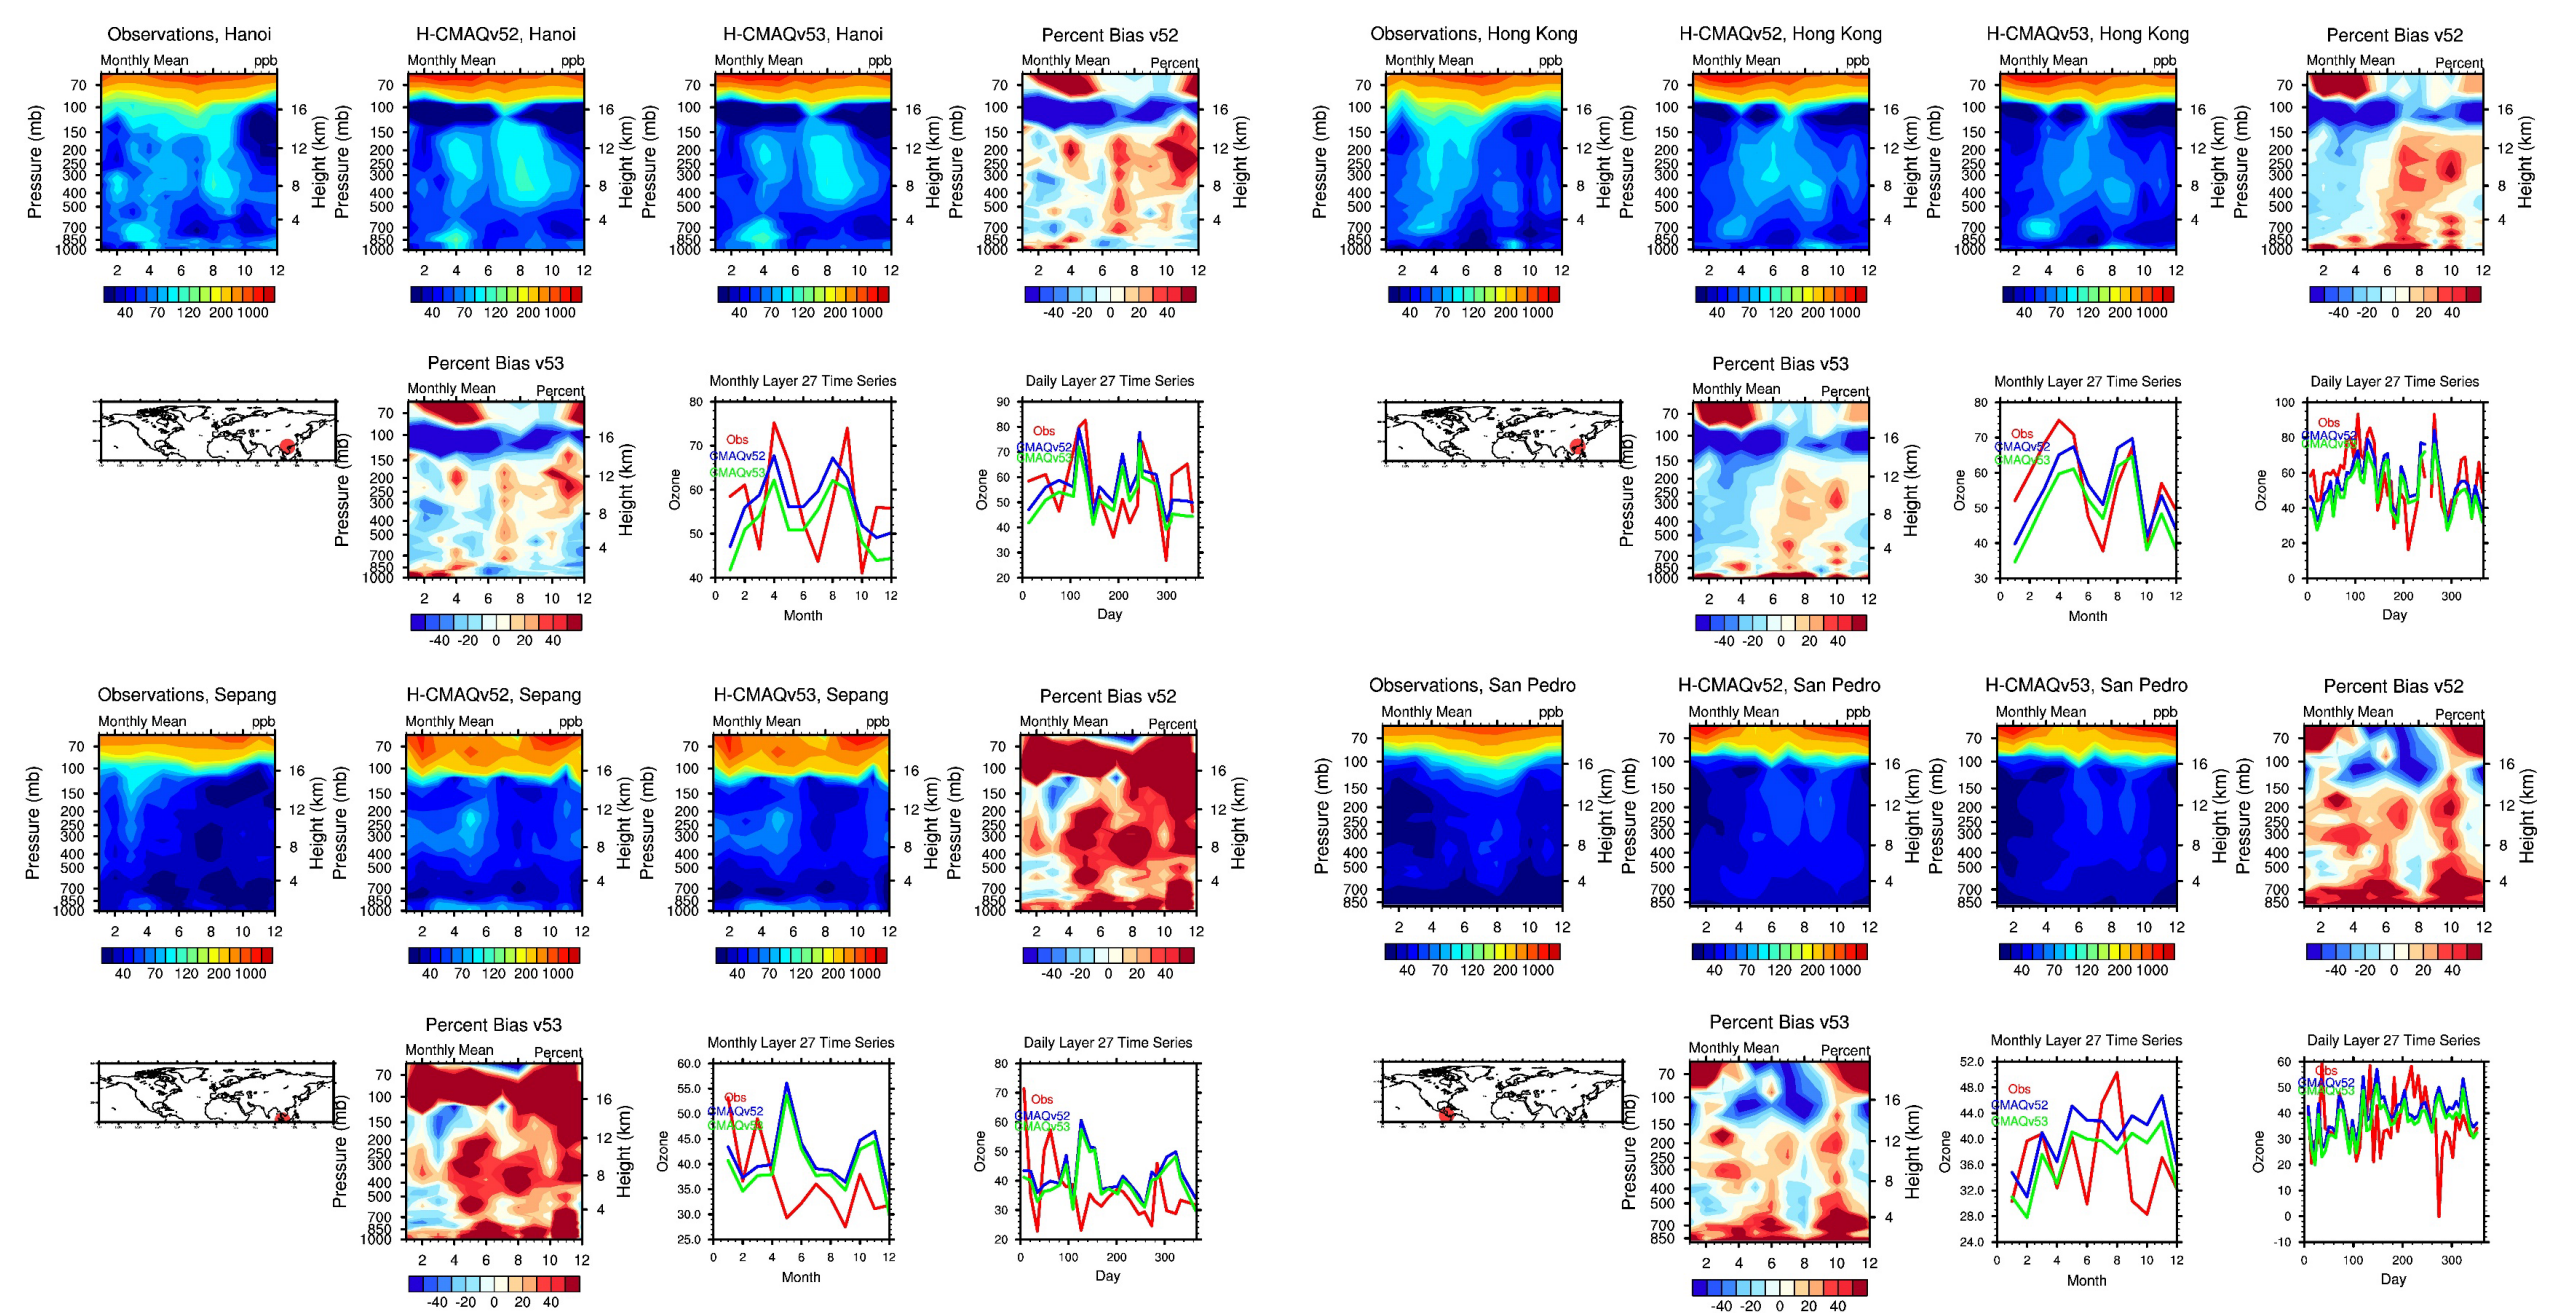

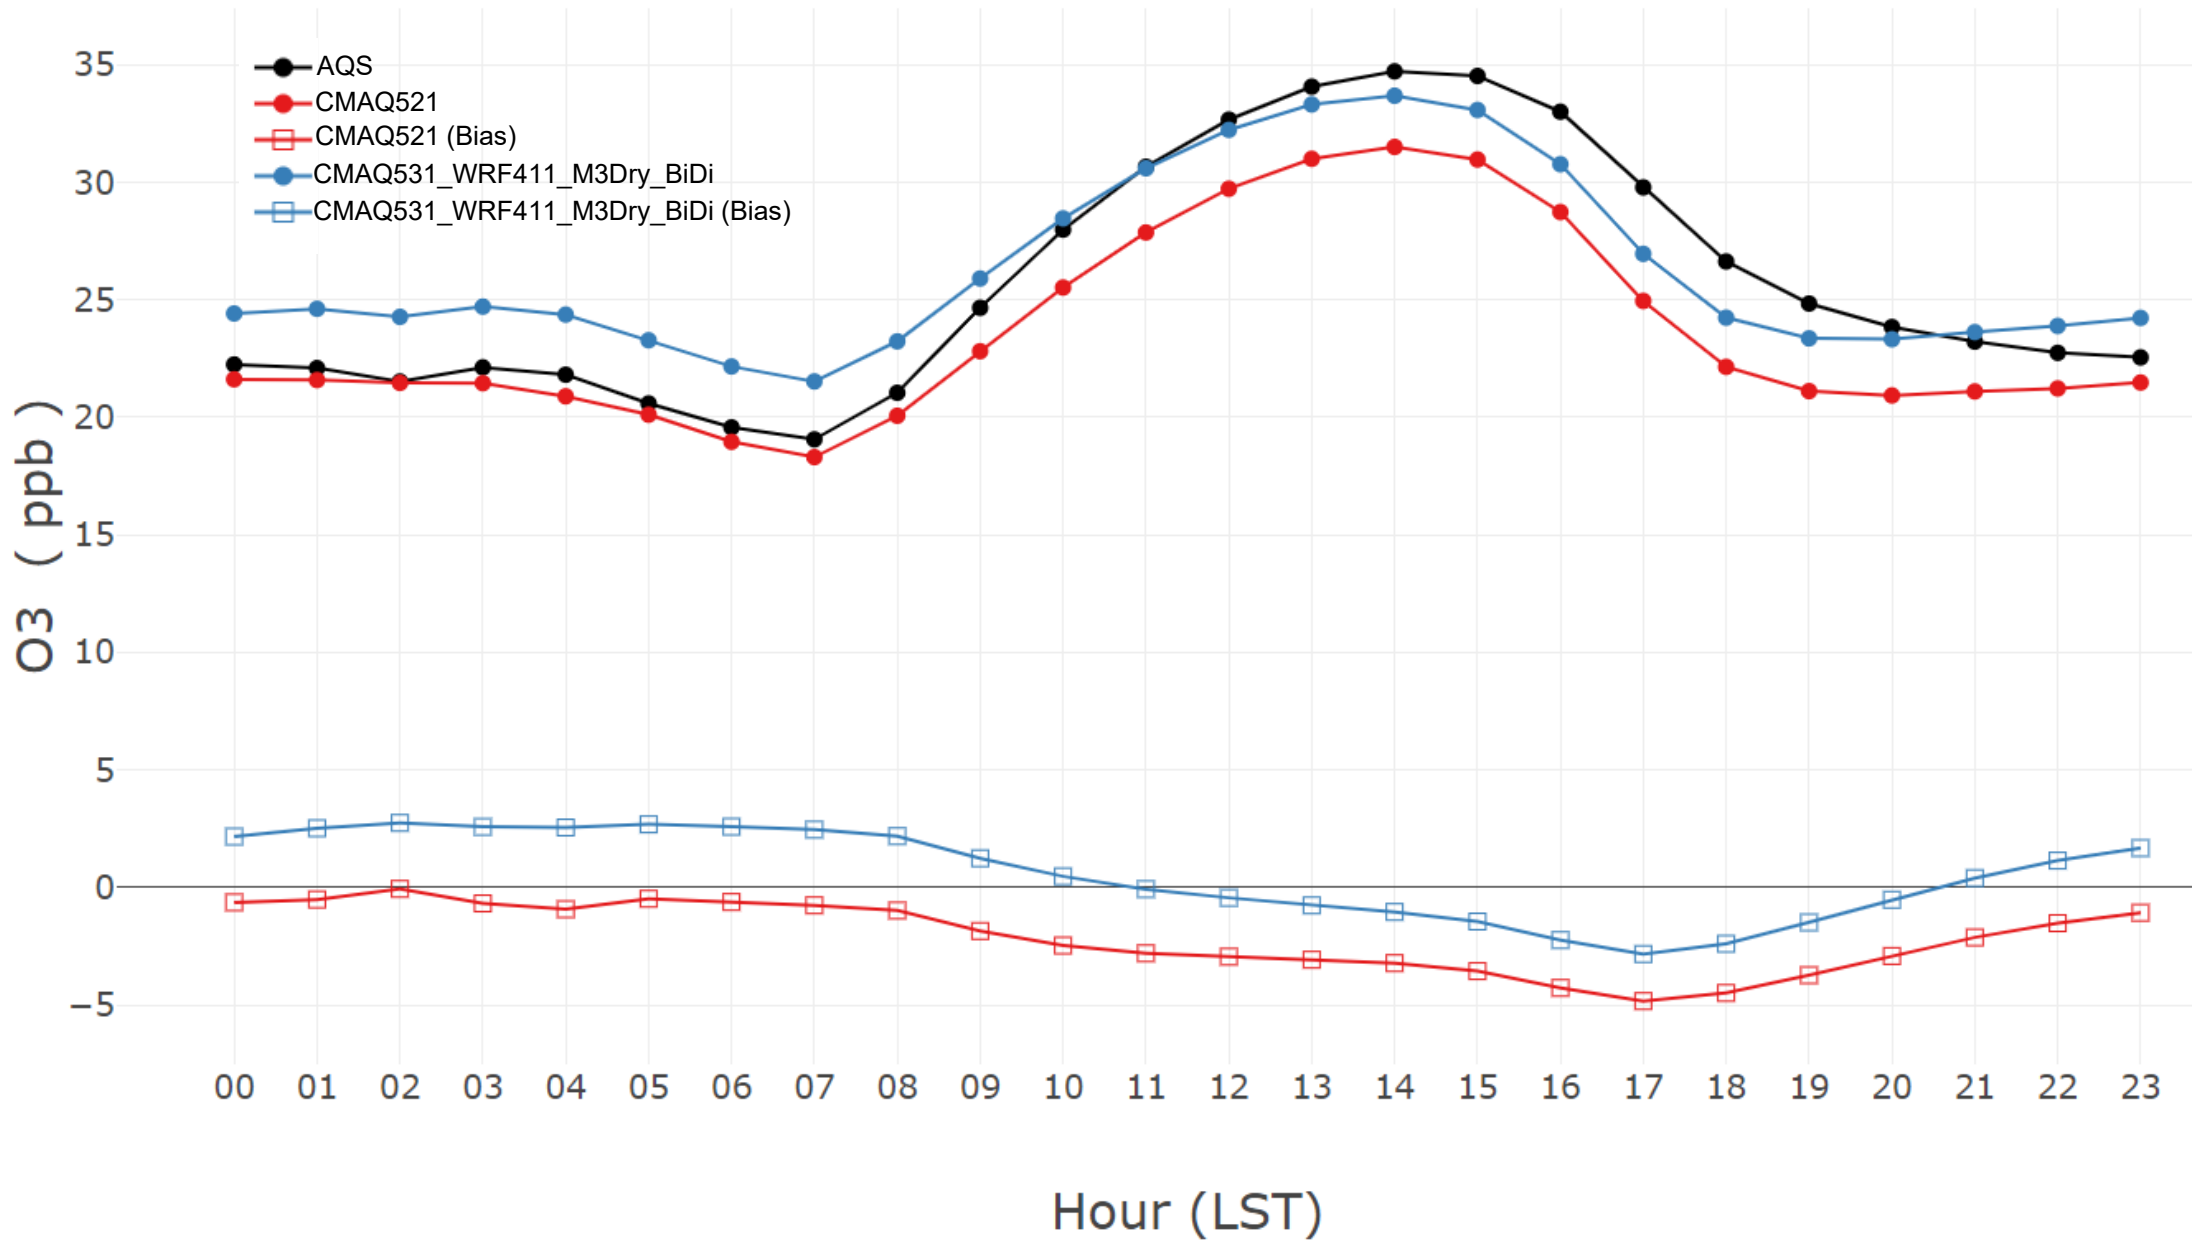

Figure S9. Time series of hourly average O<sub>3</sub> (ppbv; filled circles) and bias (open squares; ppbv) for all AQS sites for winter for the CMAQ521 (red) and CMAQ531\_WRF411\_M3Dry\_BiDi (blue) simulations.

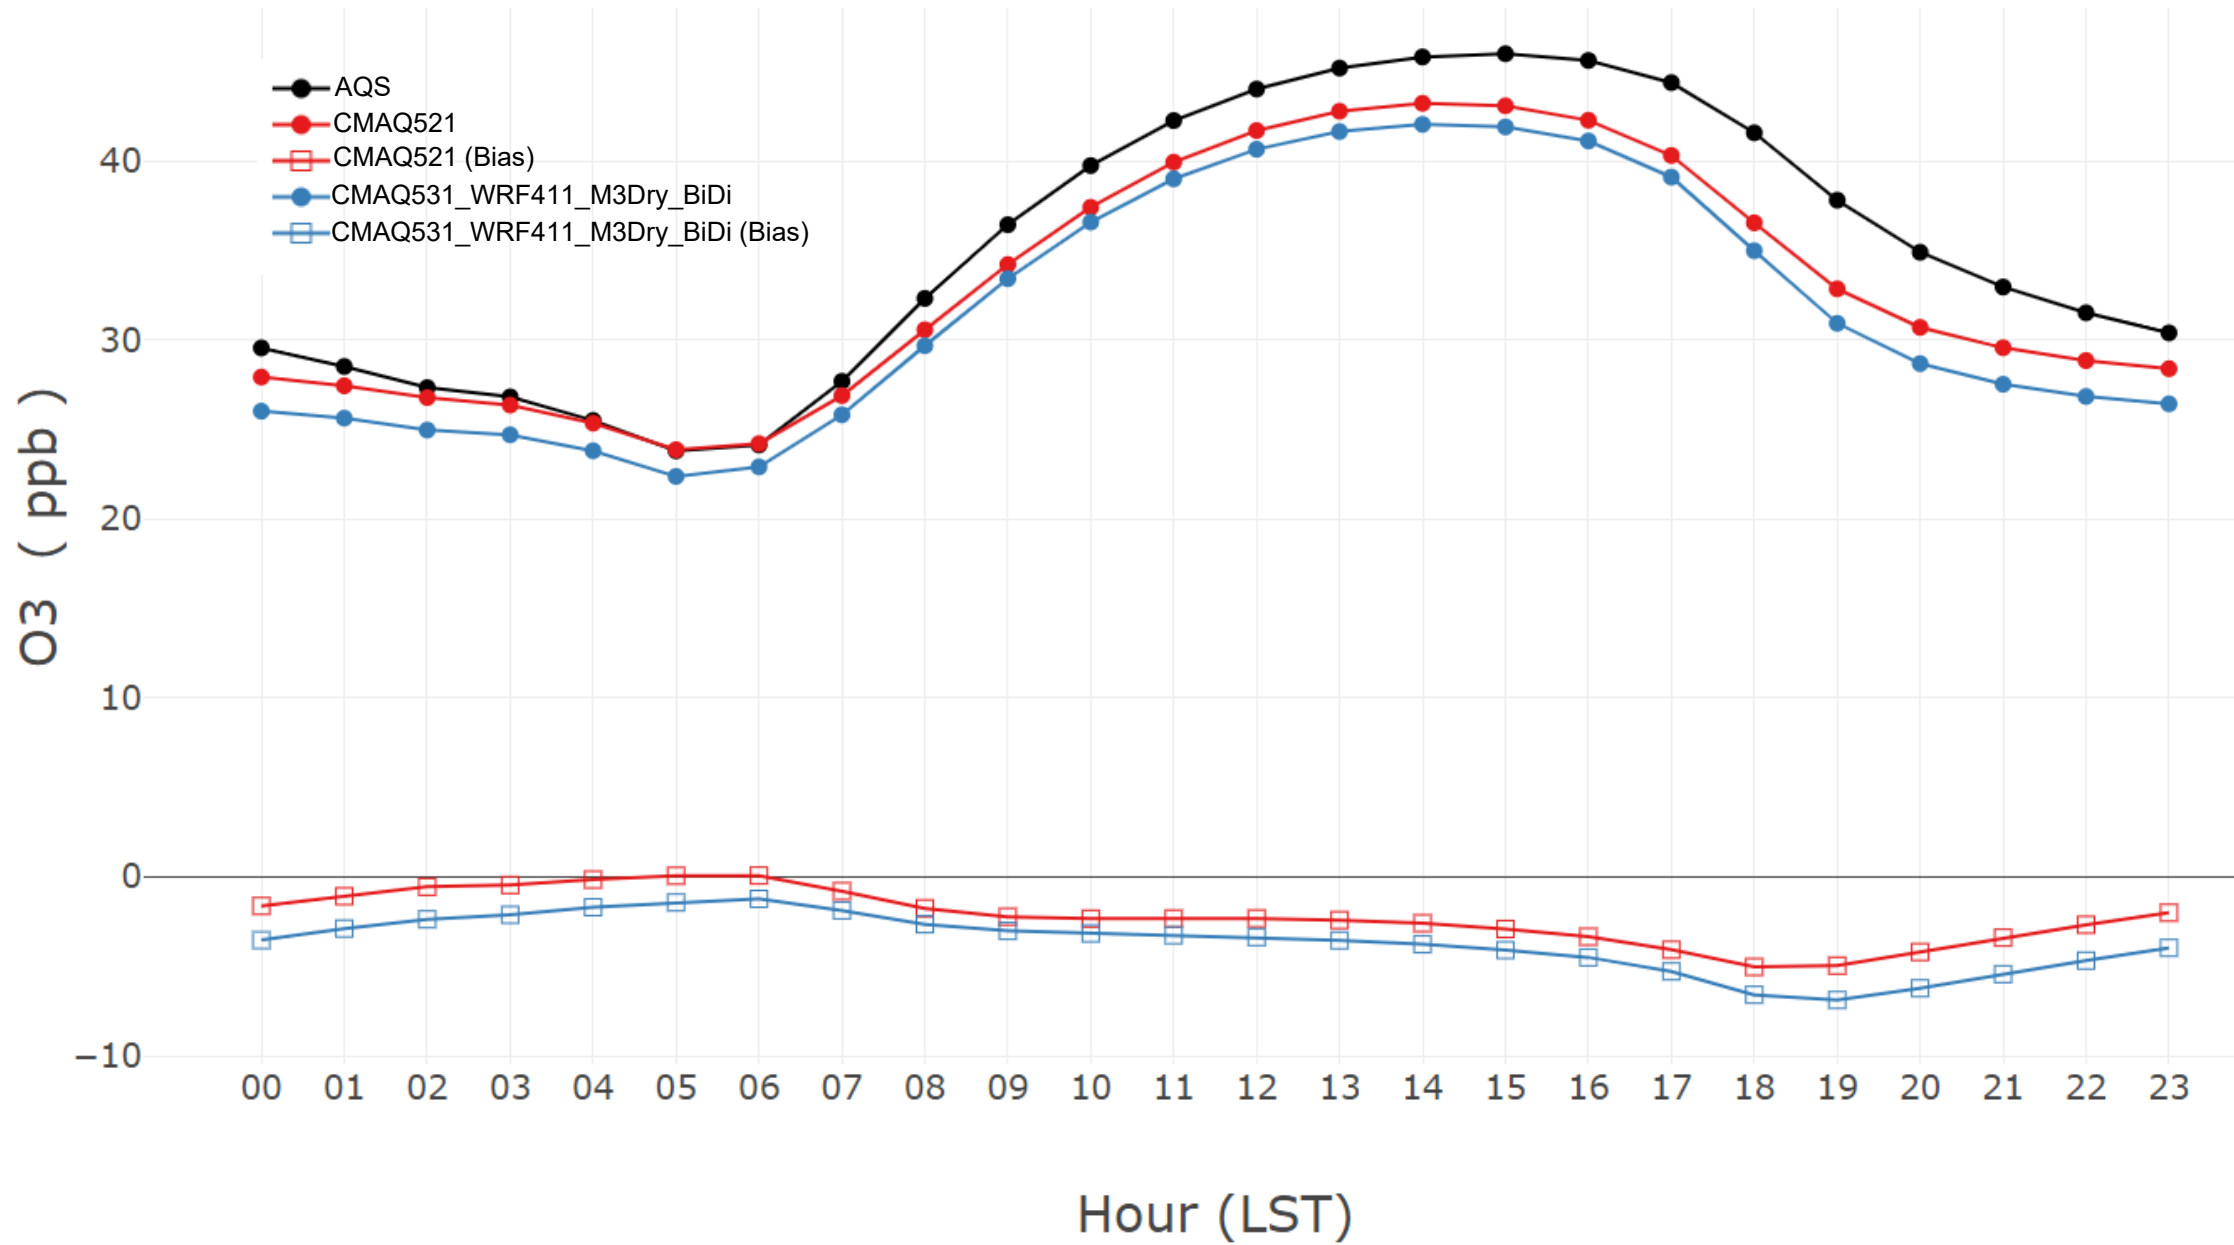

Figure S10. Time series of hourly average O<sub>3</sub> (ppbv; filled circles) and bias (open squares; ppbv) for all AQS sites for spring for the CMAQ521 (red) and CMAQ531\_WRF411\_M3Dry\_BiDi (blue) simulations.

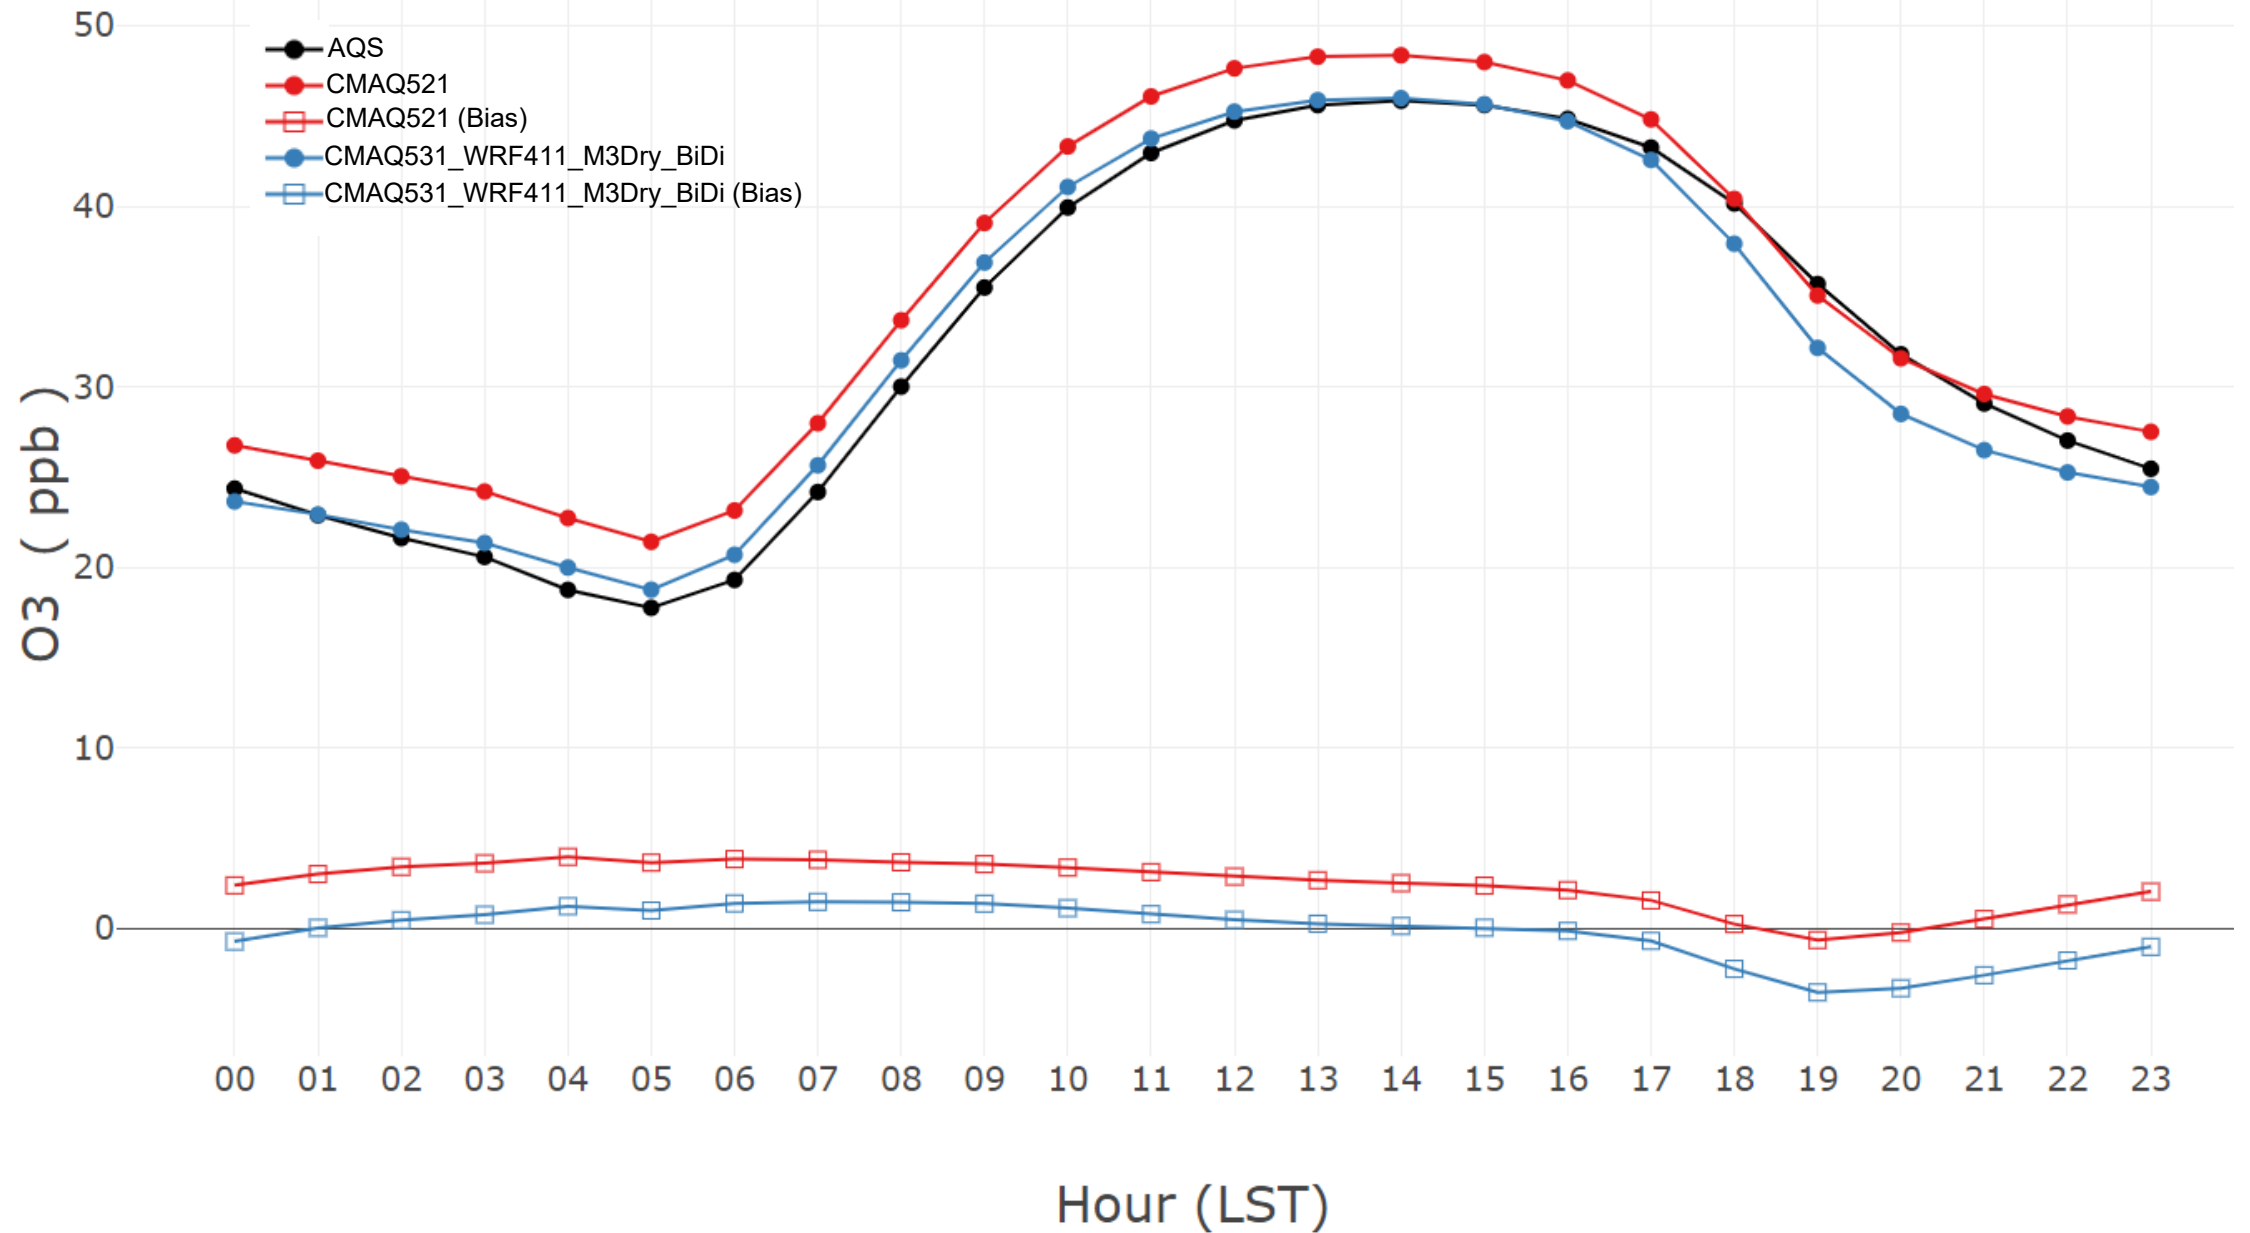

Figure S11. Time series of hourly average O<sub>3</sub> (ppbv; filled circles) and bias (open squares; ppbv) for all AQS sites for summer for the CMAQ521 (red) and CMAQ531\_WRF411\_M3Dry\_BiDi (blue) simulations.

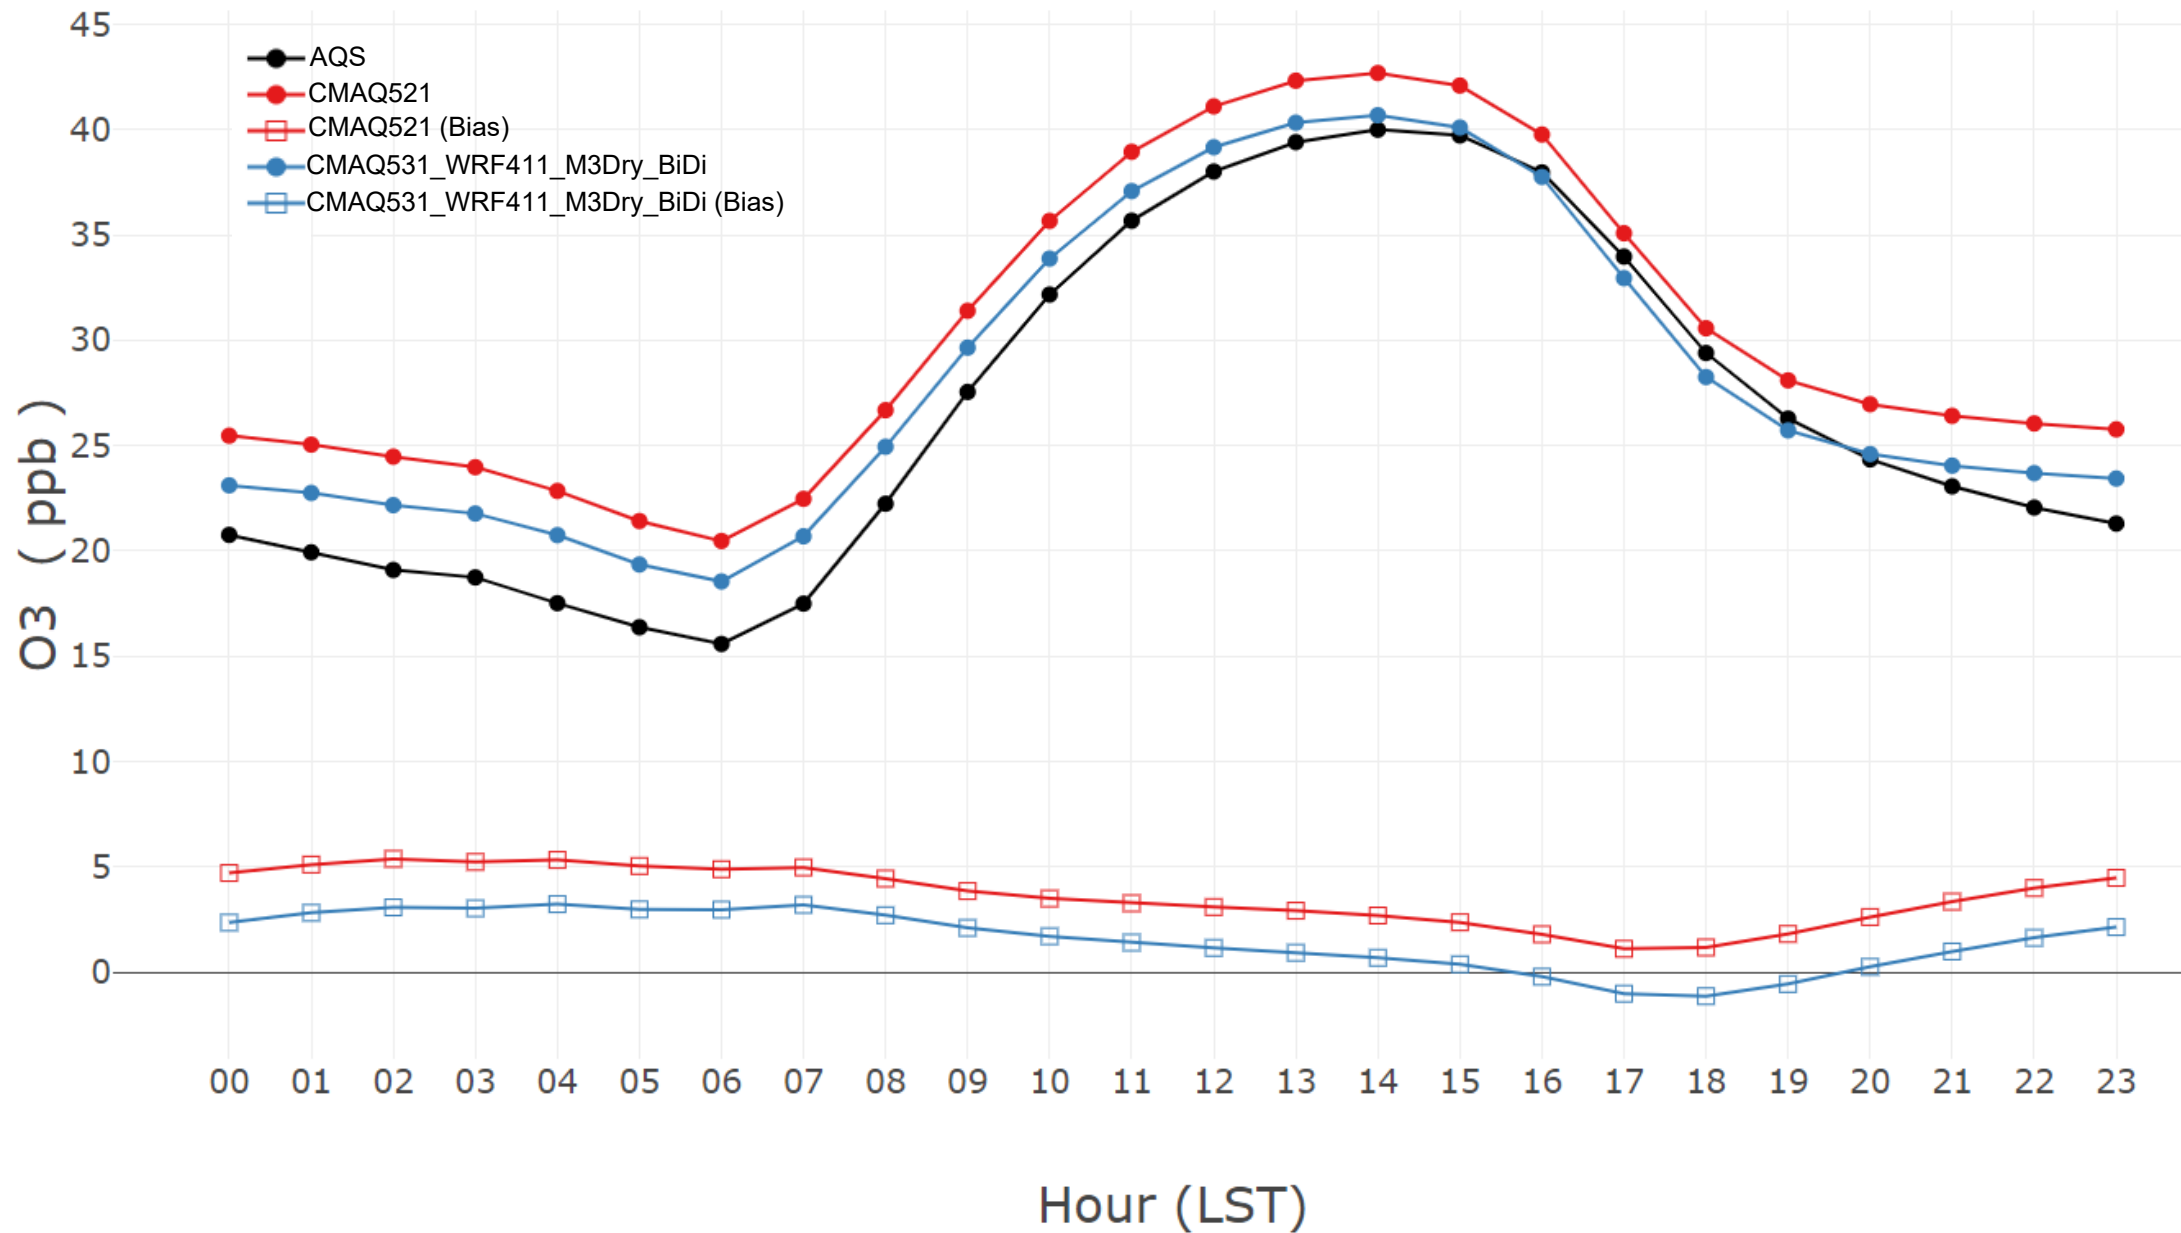

Figure S12. Time series of hourly average O<sub>3</sub> (ppbv; filled circles) and bias (open squares; ppbv) for all AQS sites for fall for the CMAQ521 (red) and CMAQ531\_WRF411\_M3Dry\_BiDi (blue) simulations.



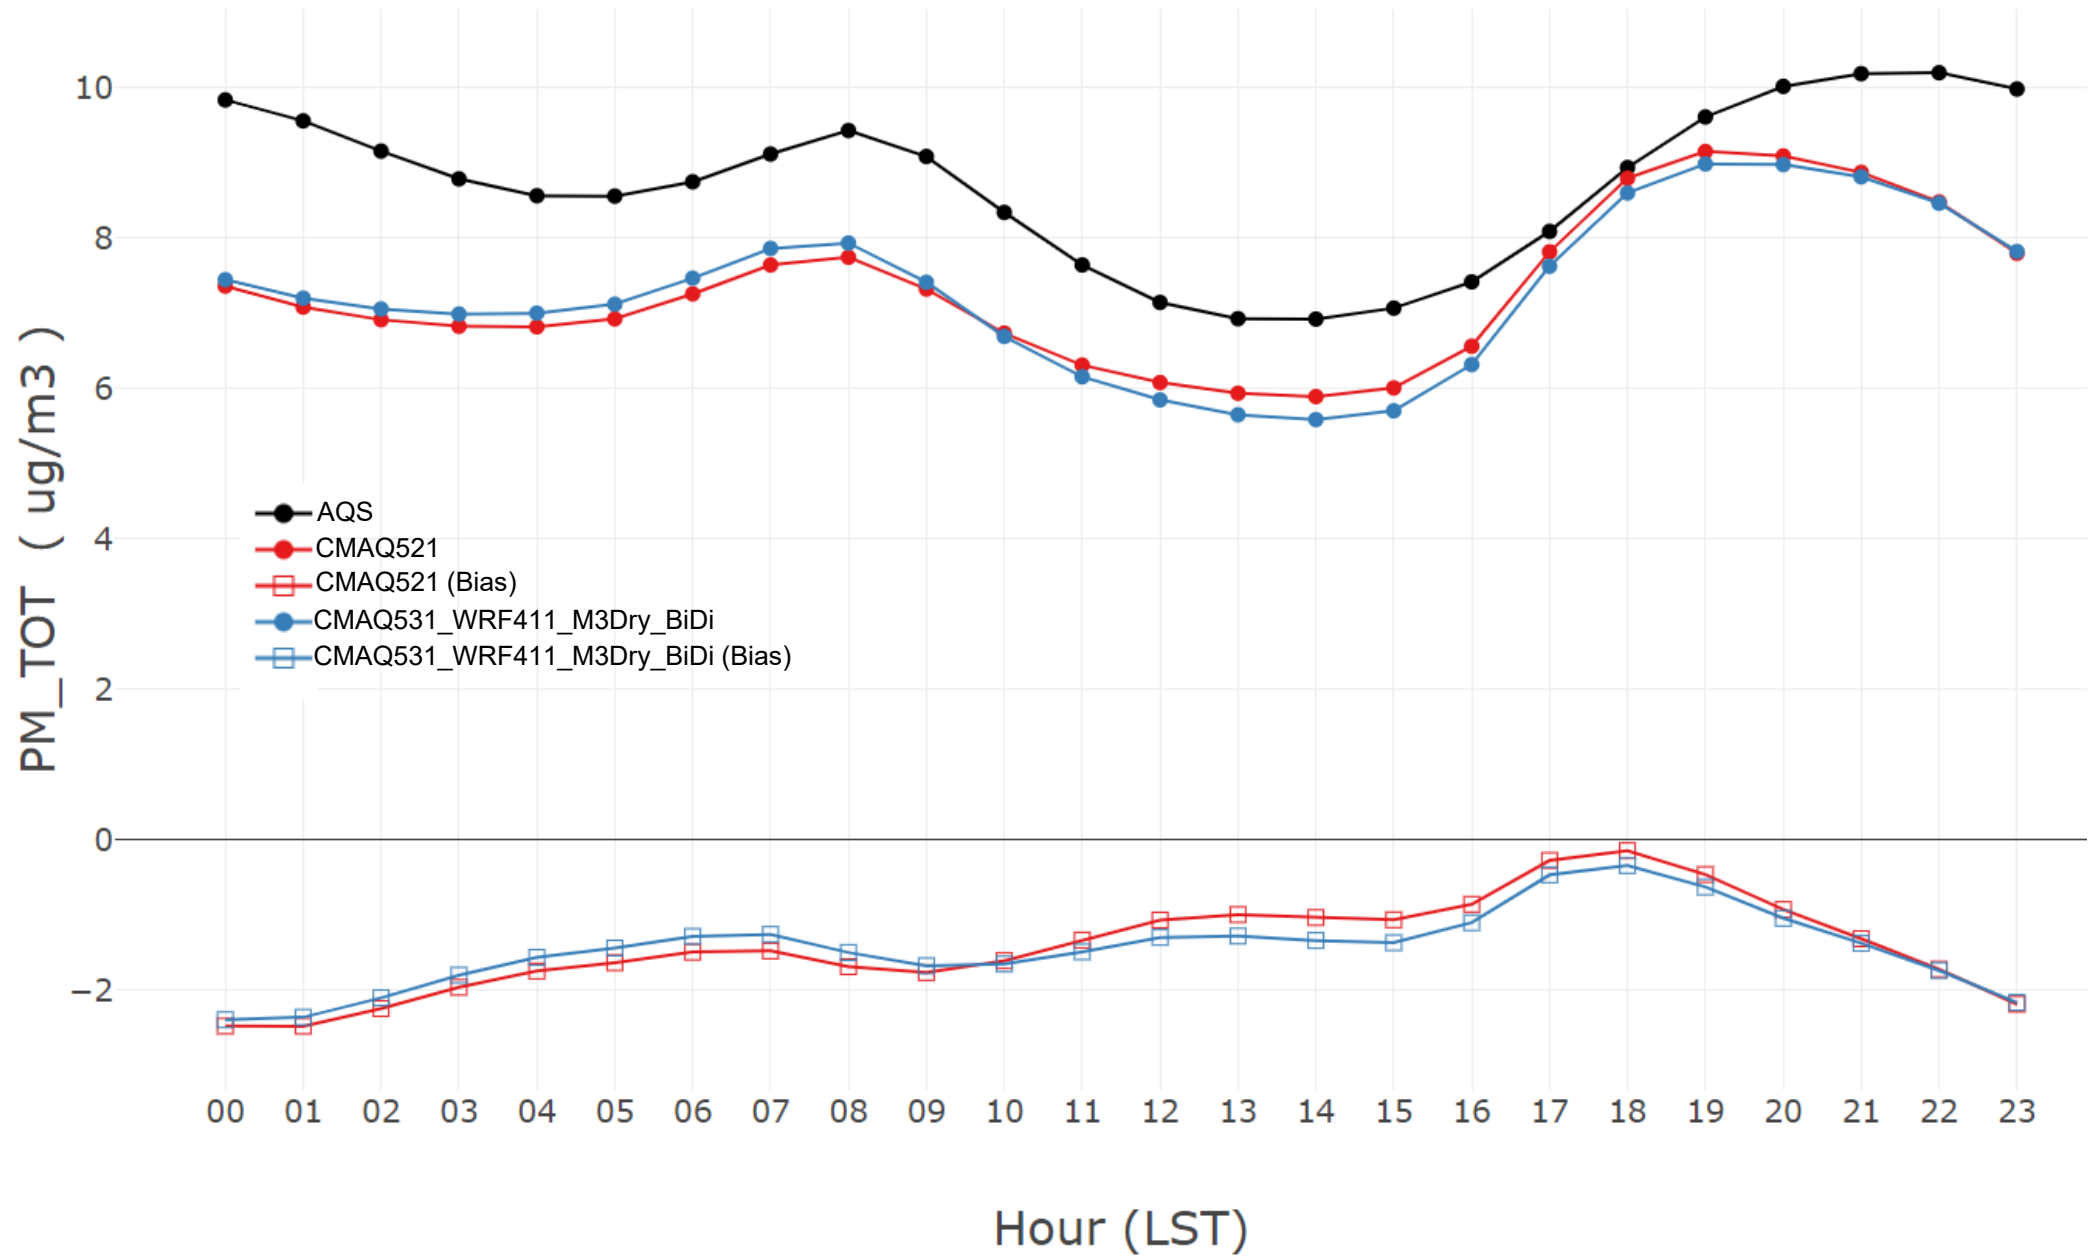

Figure S13. Time series of hourly average  $\text{PM}_{2.5}$  ( $\mu\text{g m}^{-3}$ ; filled circles) and bias ( $\mu\text{g m}^{-3}$ ; open squares) for all AQS sites for winter for the CMAQ521 (red) and CMAQ531\_WRF411\_M3Dry\_BiDi (blue) simulations.

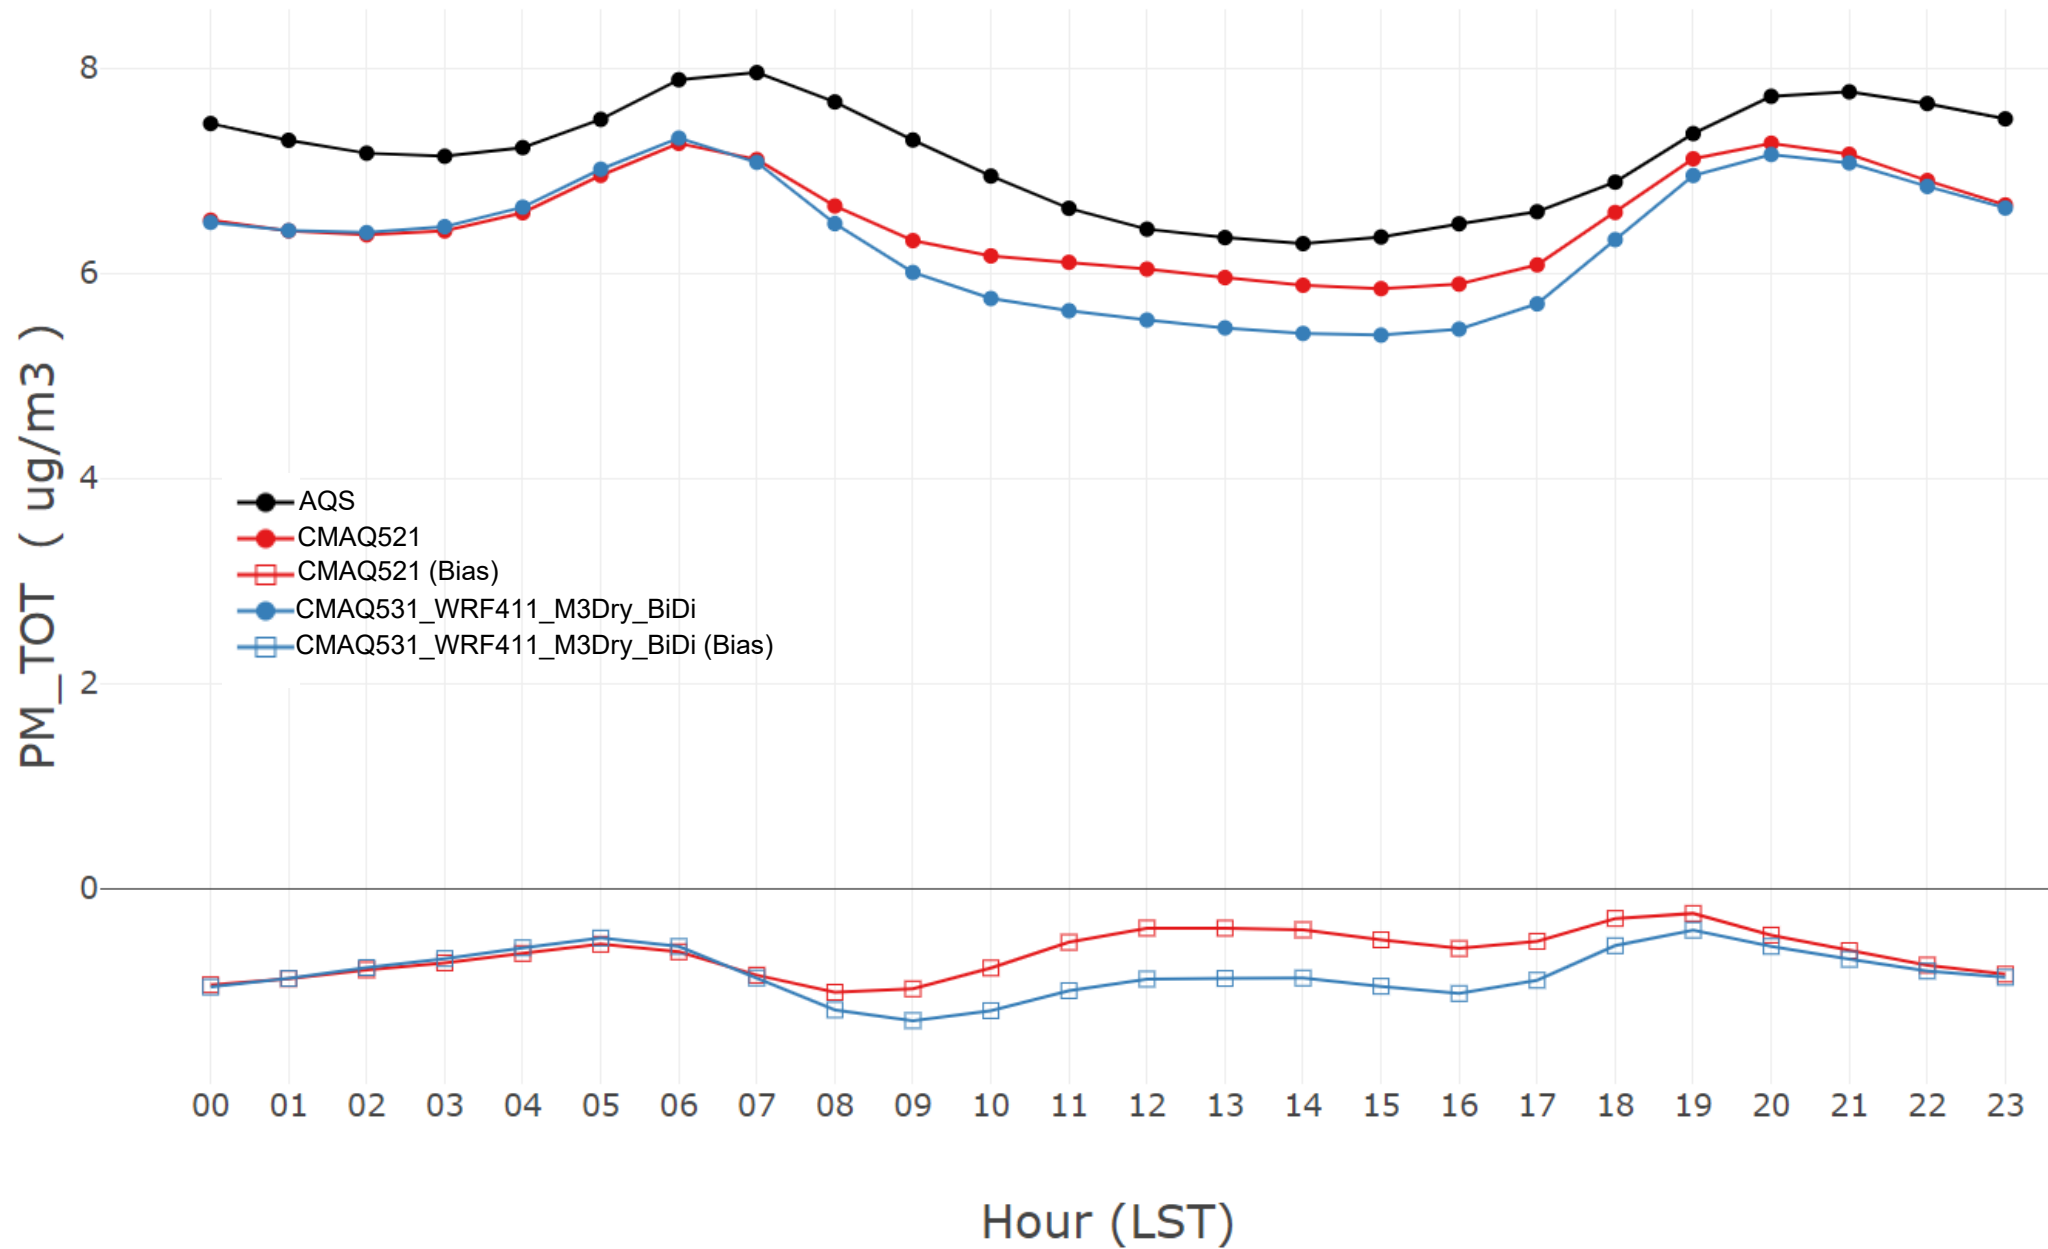

Figure S14. Time series of hourly average PM<sub>2.5</sub> ( $\mu\text{g}/\text{m}^3$ ; filled circles) and bias ( $\mu\text{g}/\text{m}^3$ ; open squares) for all AQS sites for spring for the CMAQ521 (red) and CMAQ531\_WRF411\_M3Dry\_BiDi (blue) simulations.



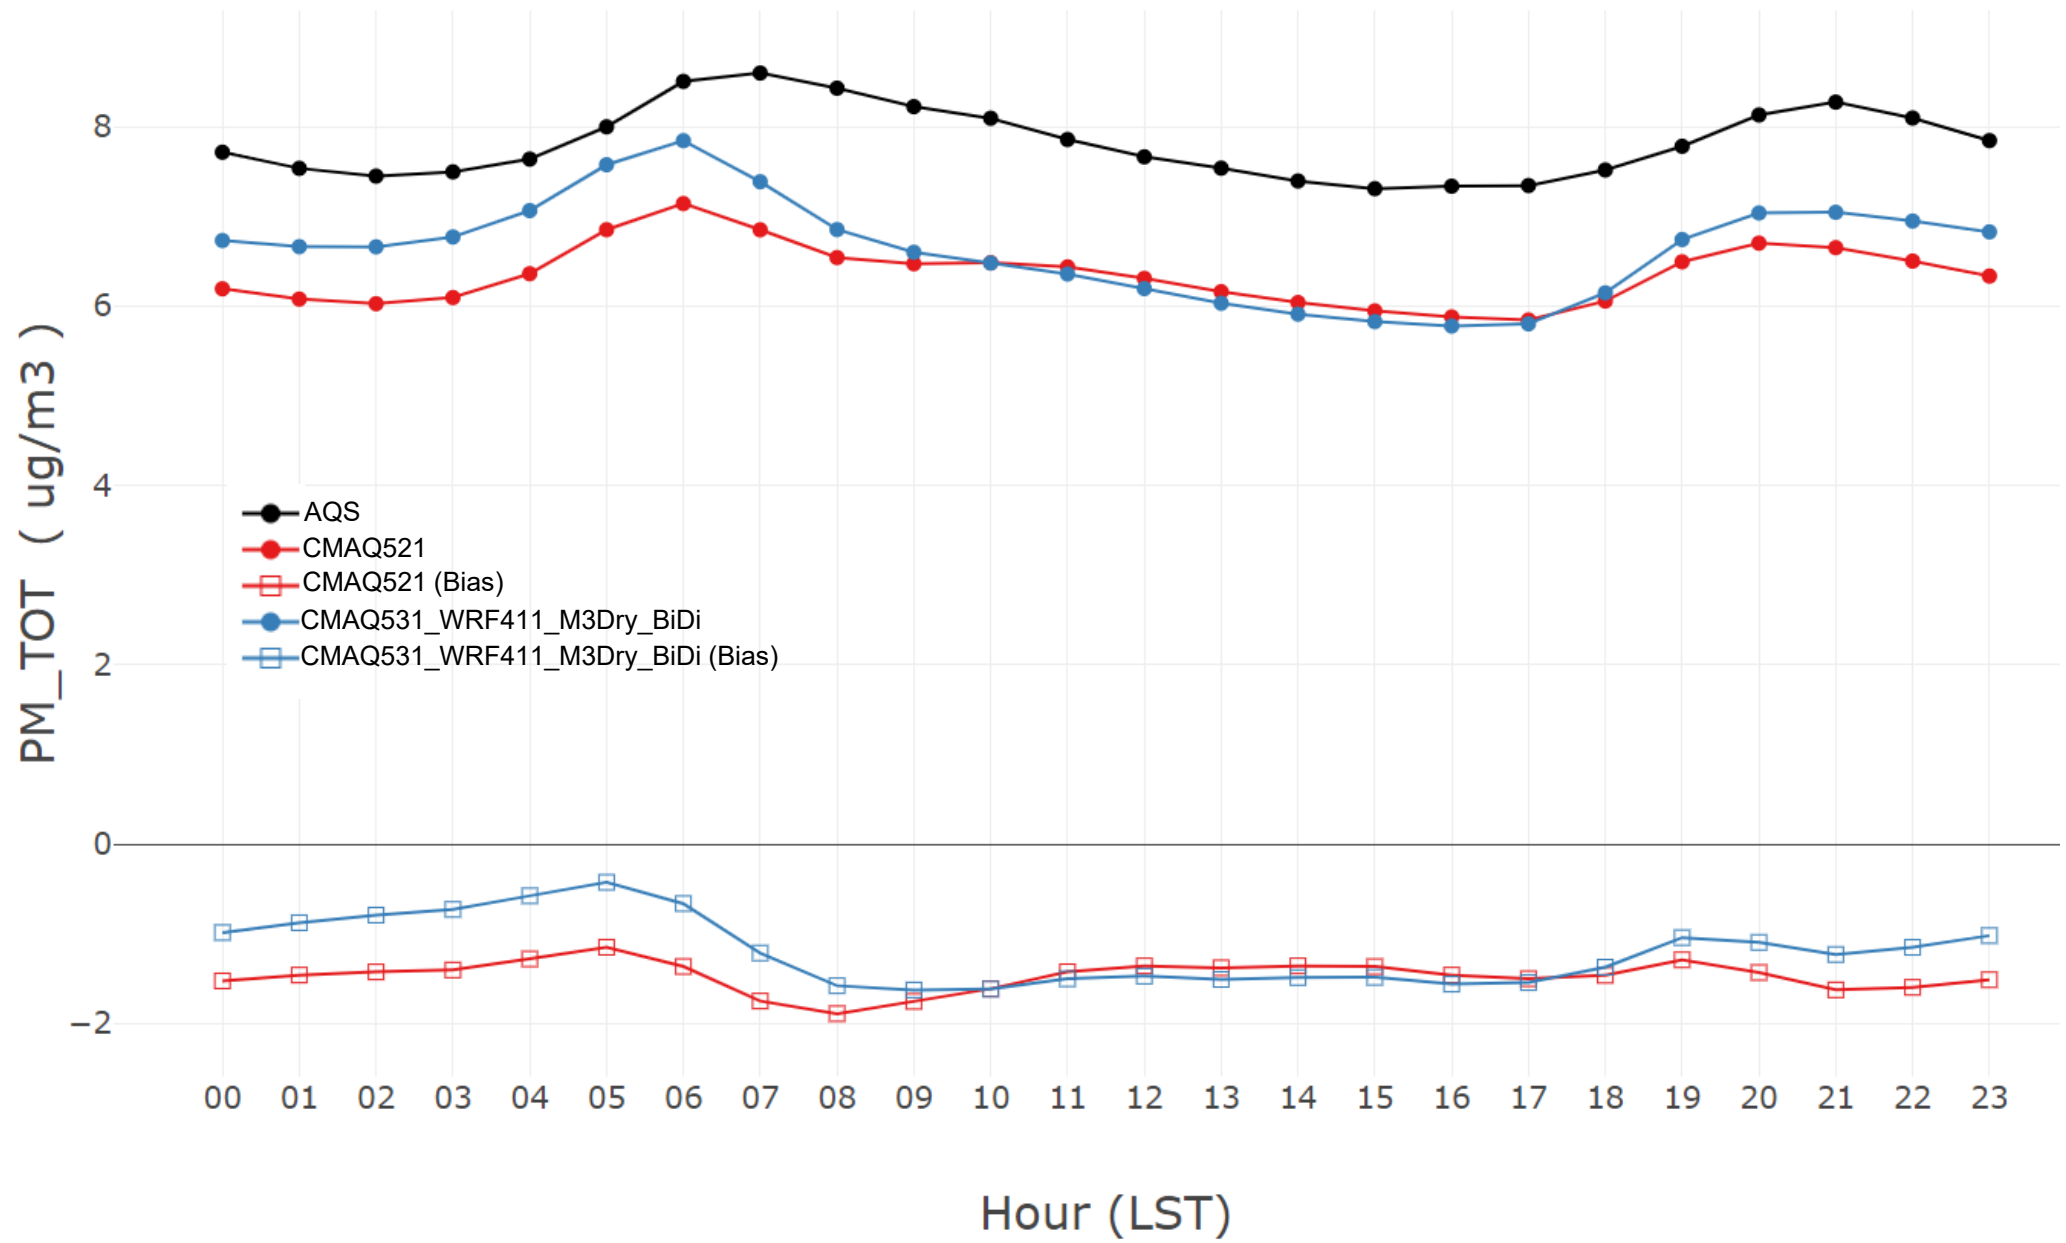

Figure S15. Time series of hourly average  $\text{PM}_{2.5}$  ( $\mu\text{g m}^{-3}$ ; filled circles) and bias ( $\mu\text{g m}^{-3}$ ; open squares) for all AQS sites for summer for the CMAQ521 (red) and CMAQ531\_WRF411\_M3Dry\_BiDi (blue) simulations.

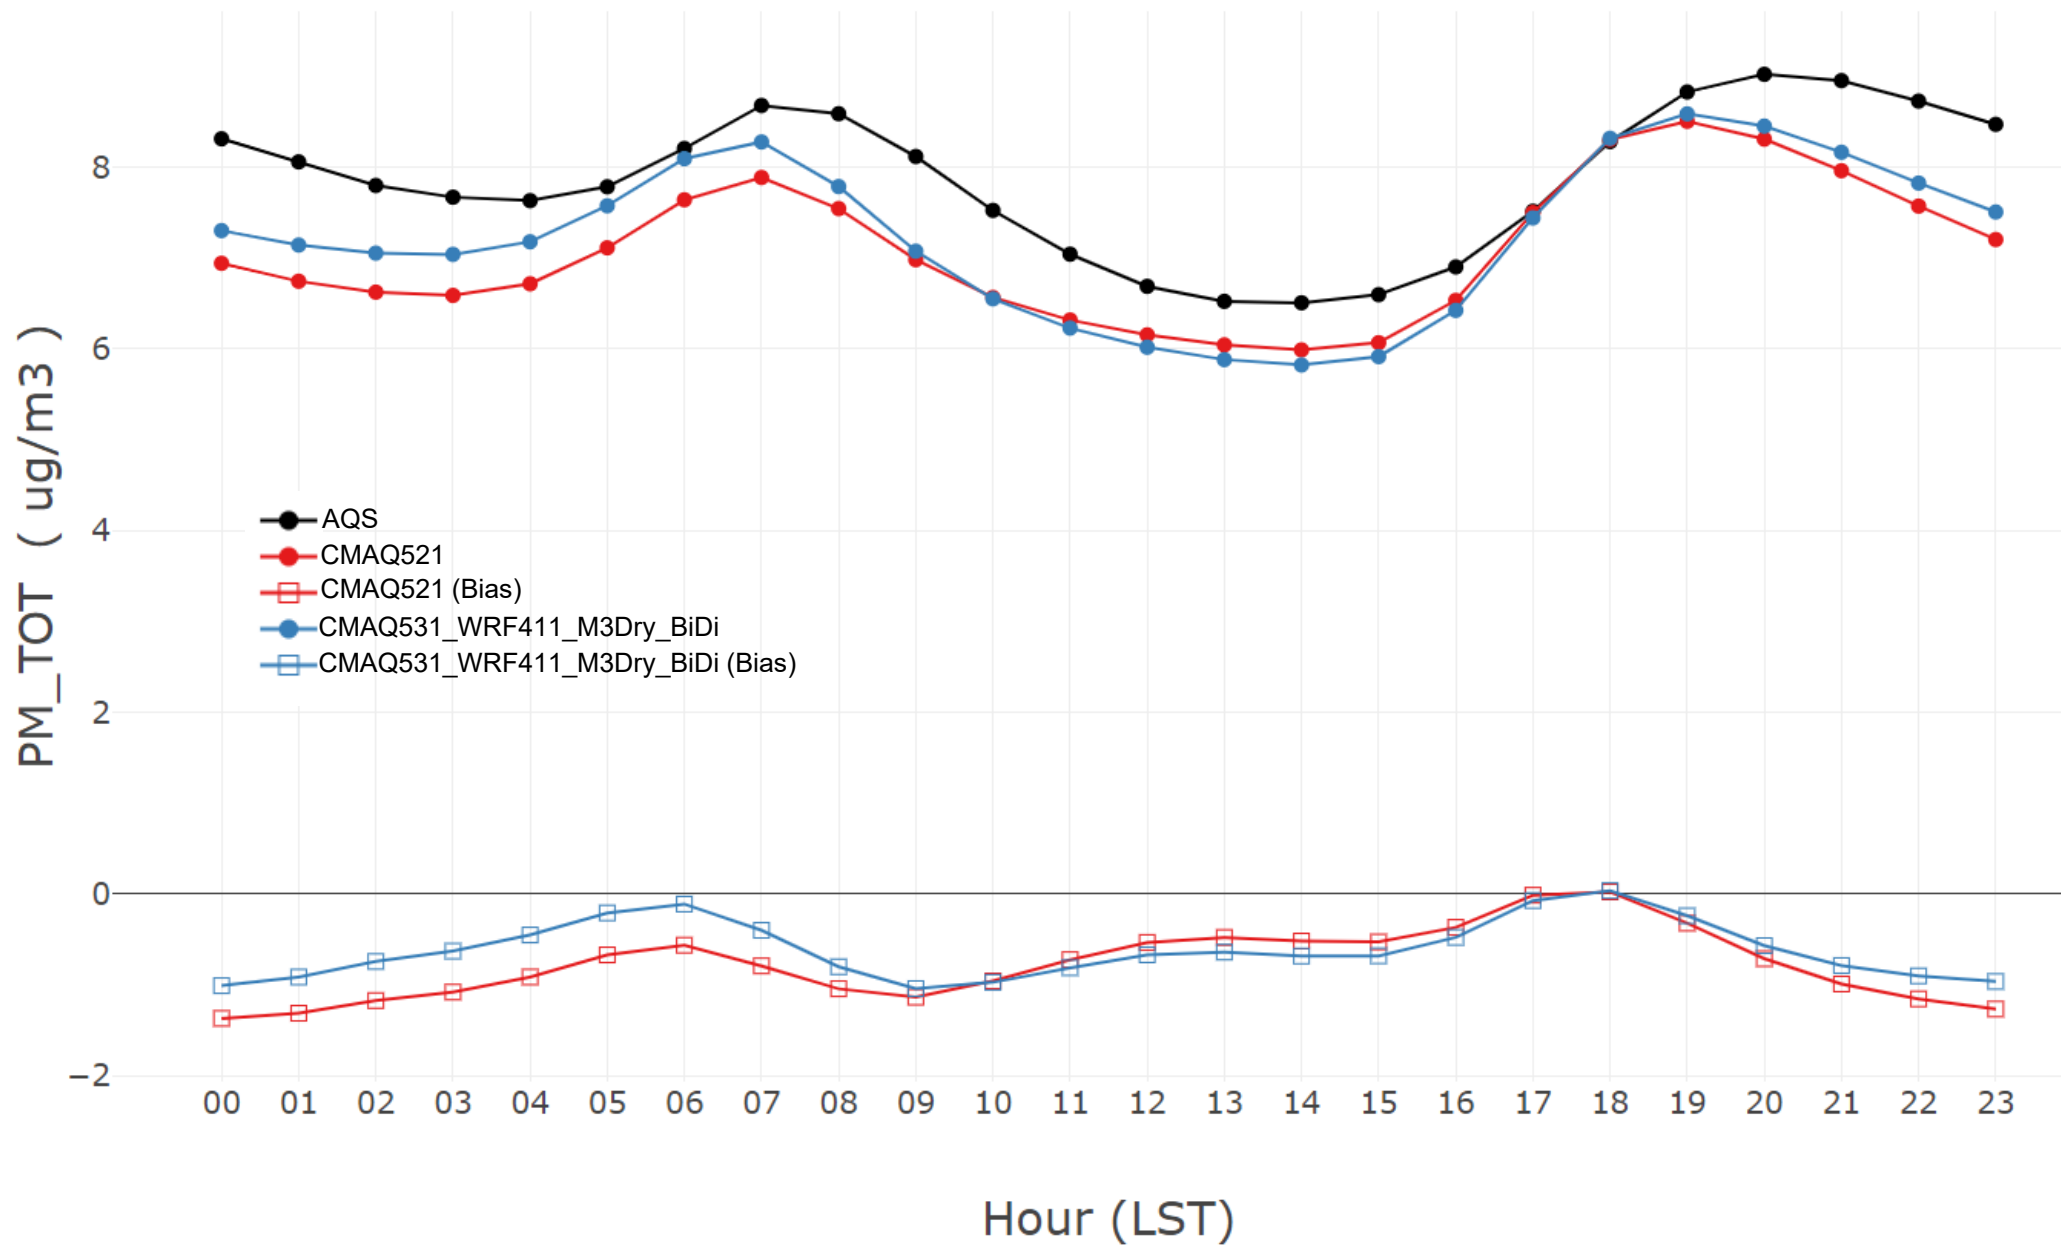

Figure S16. Time series of hourly average PM<sub>2.5</sub> ( $\mu\text{g m}^{-3}$ ; filled circles) and bias ( $\mu\text{g m}^{-3}$ ; open squares) for all AQS sites for fall for the CMAQ521 (red) and CMAQ531\_WRF411\_M3Dry\_BiDi (blue) simulations.

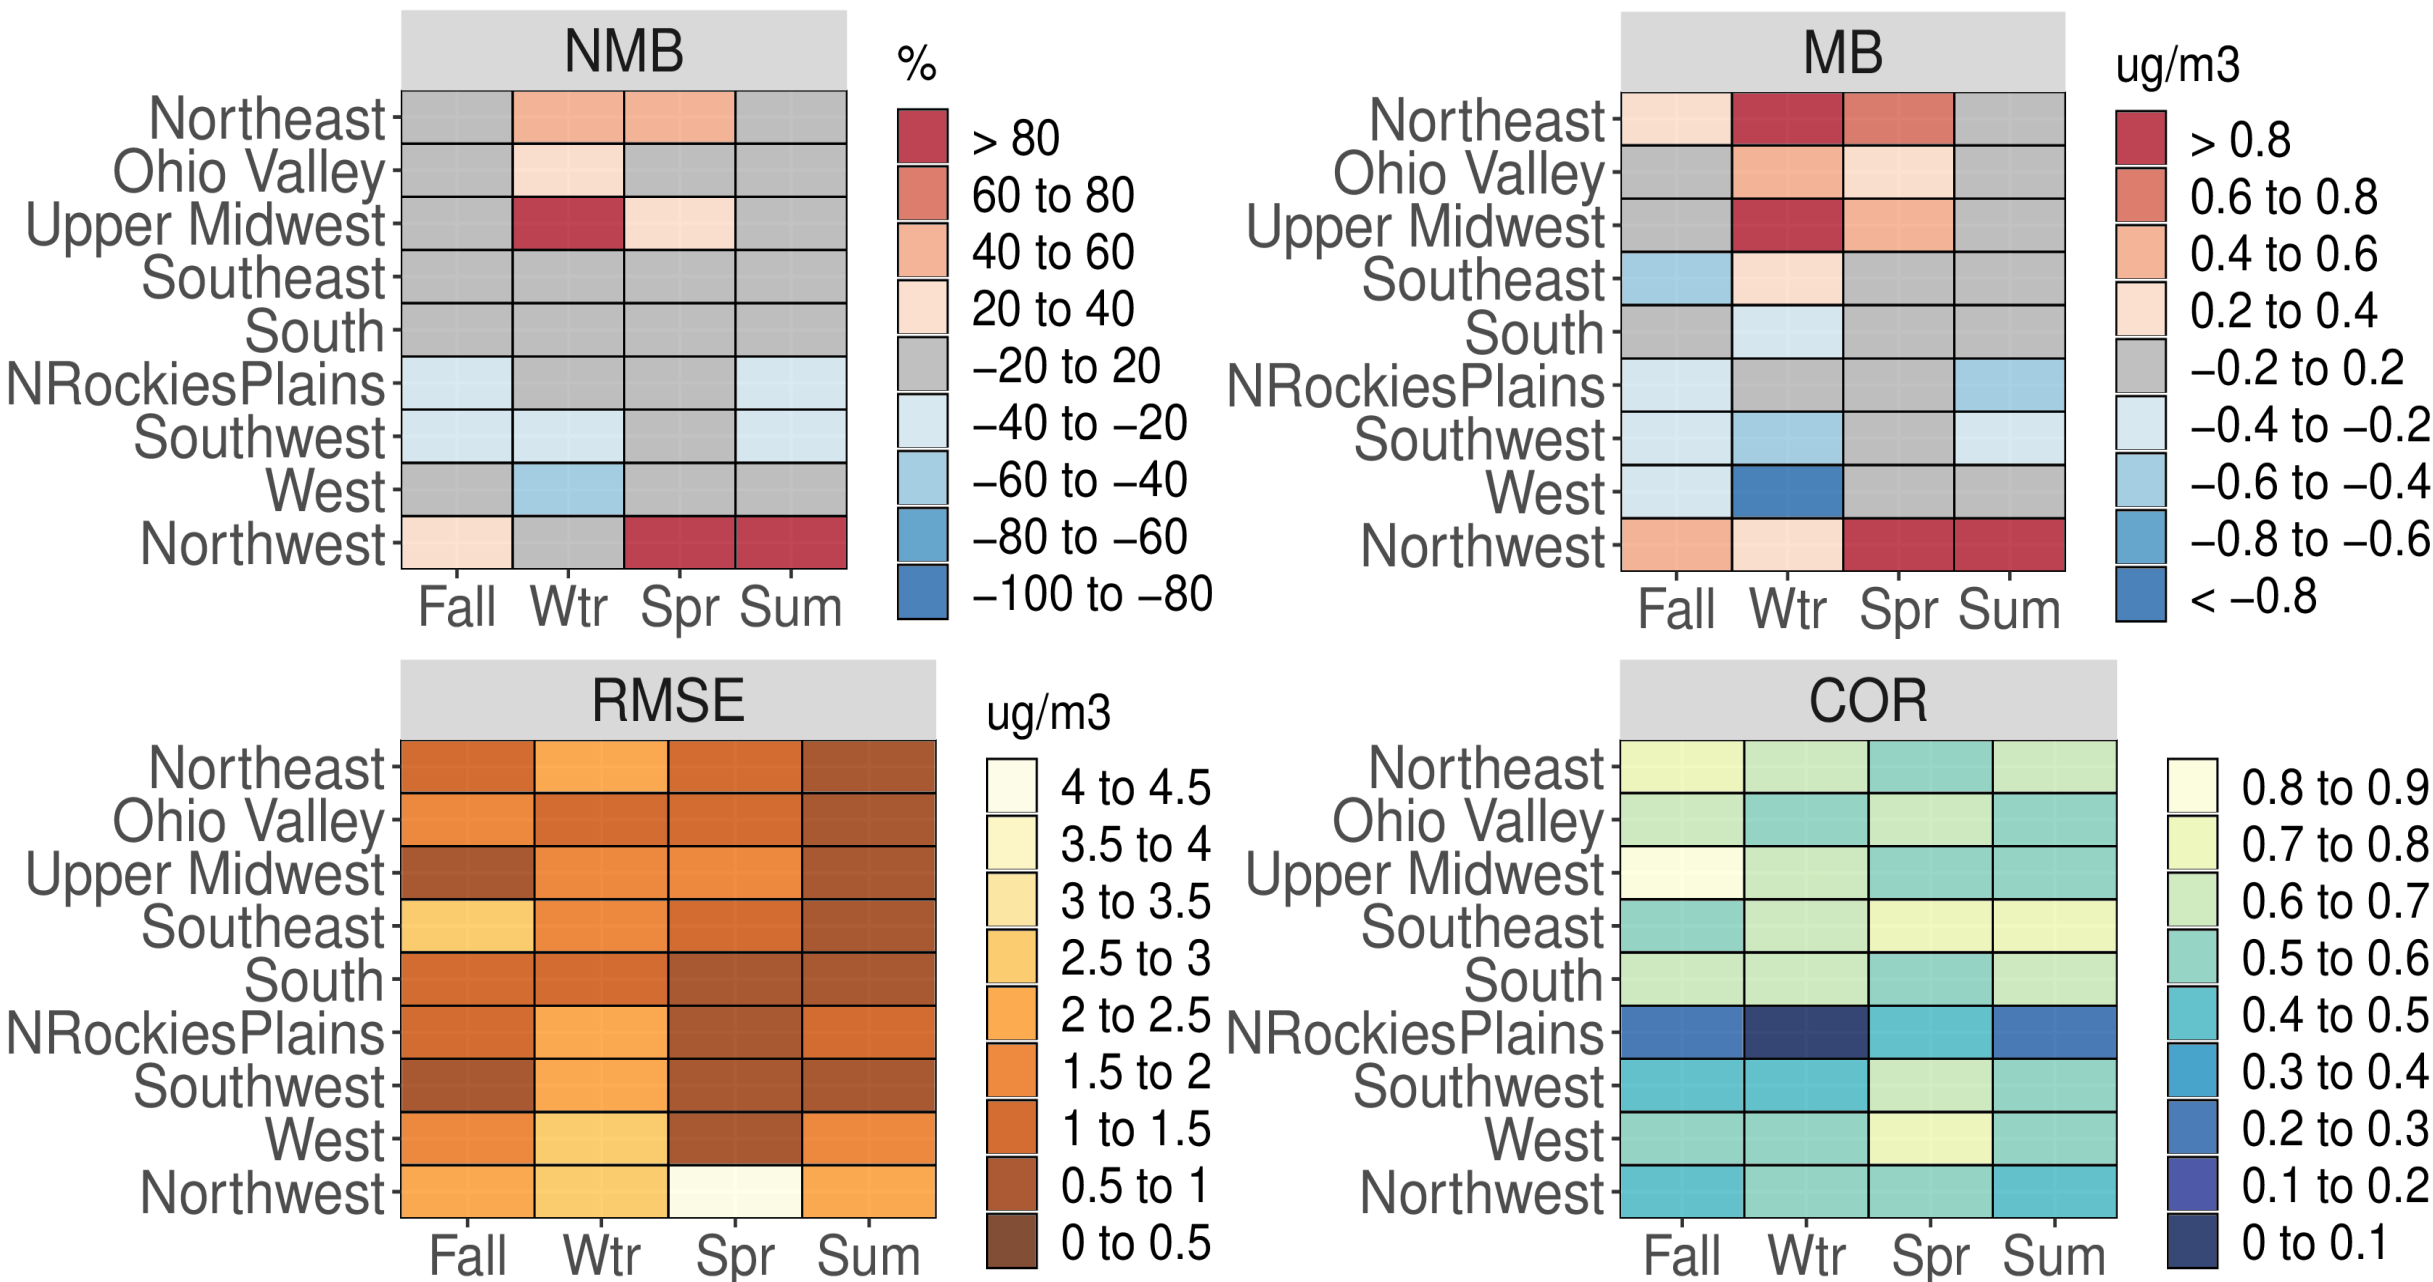

Figure S17. Categorical NMB (%), MB ( $\mu\text{g}/\text{m}^3$ ), RMSE ( $\mu\text{g}/\text{m}^3$ ), and Pearson correlation values for OC for all CSN sites based on season and NOAA climate region for the CMAQ521 simulation.

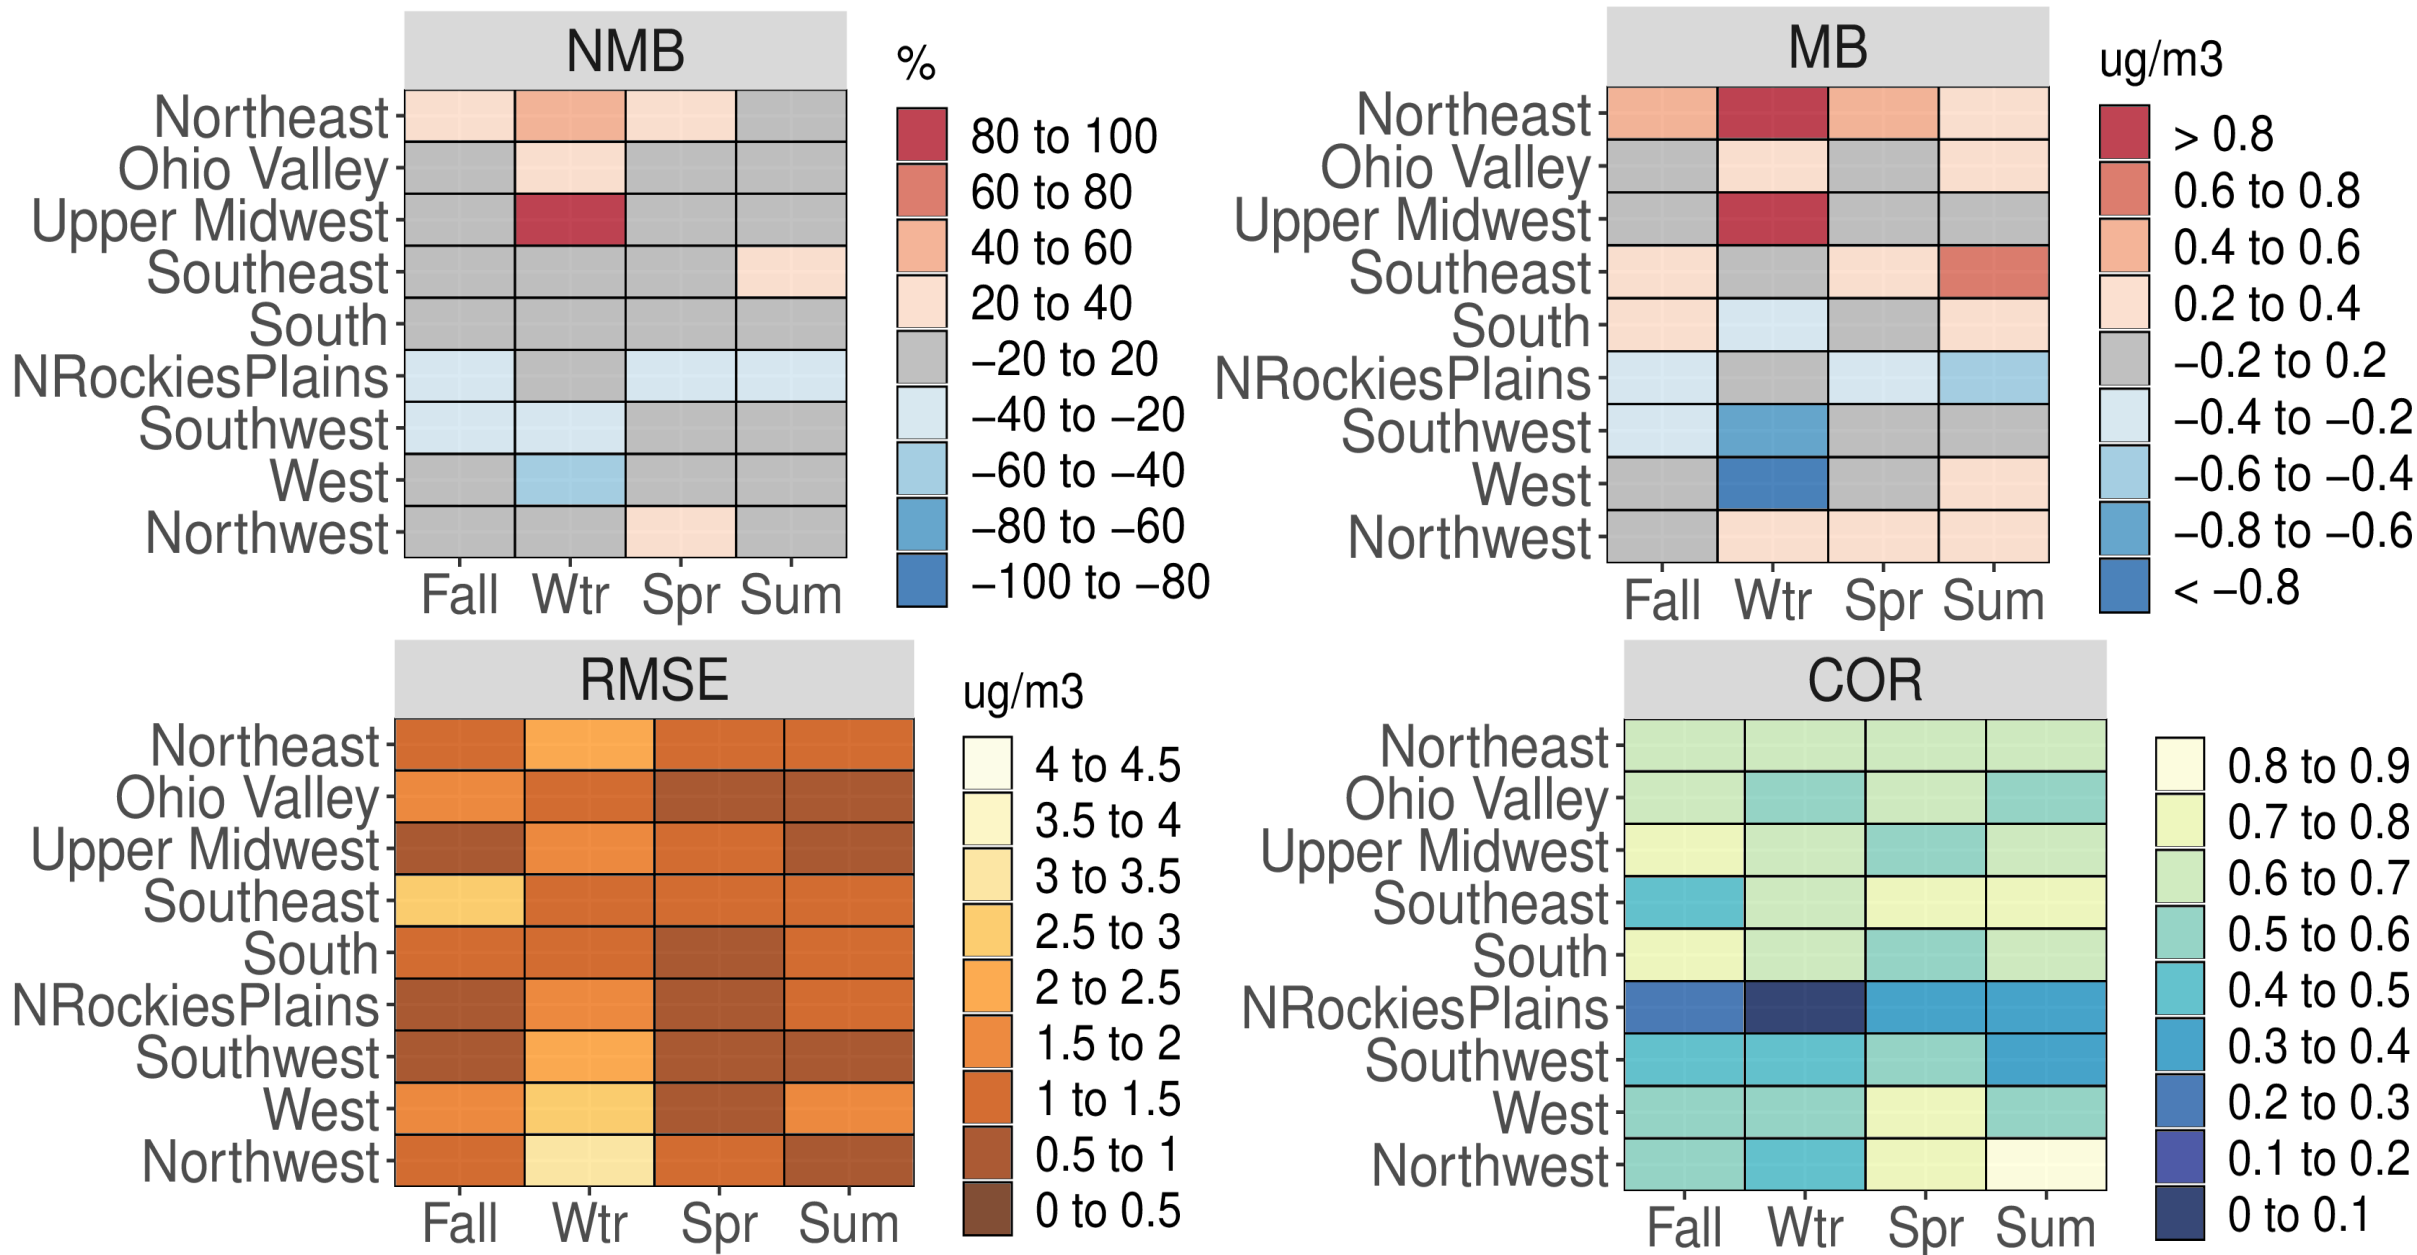

Figure S18. Categorical NMB (%), MB ( $\mu\text{g}/\text{m}^3$ ), RMSE ( $\mu\text{g}/\text{m}^3$ ), and Pearson correlation values for OC for all CSN sites based on season and NOAA climate region for the CMAQ531\_WRF411\_M3Dry\_BiDi simulation.

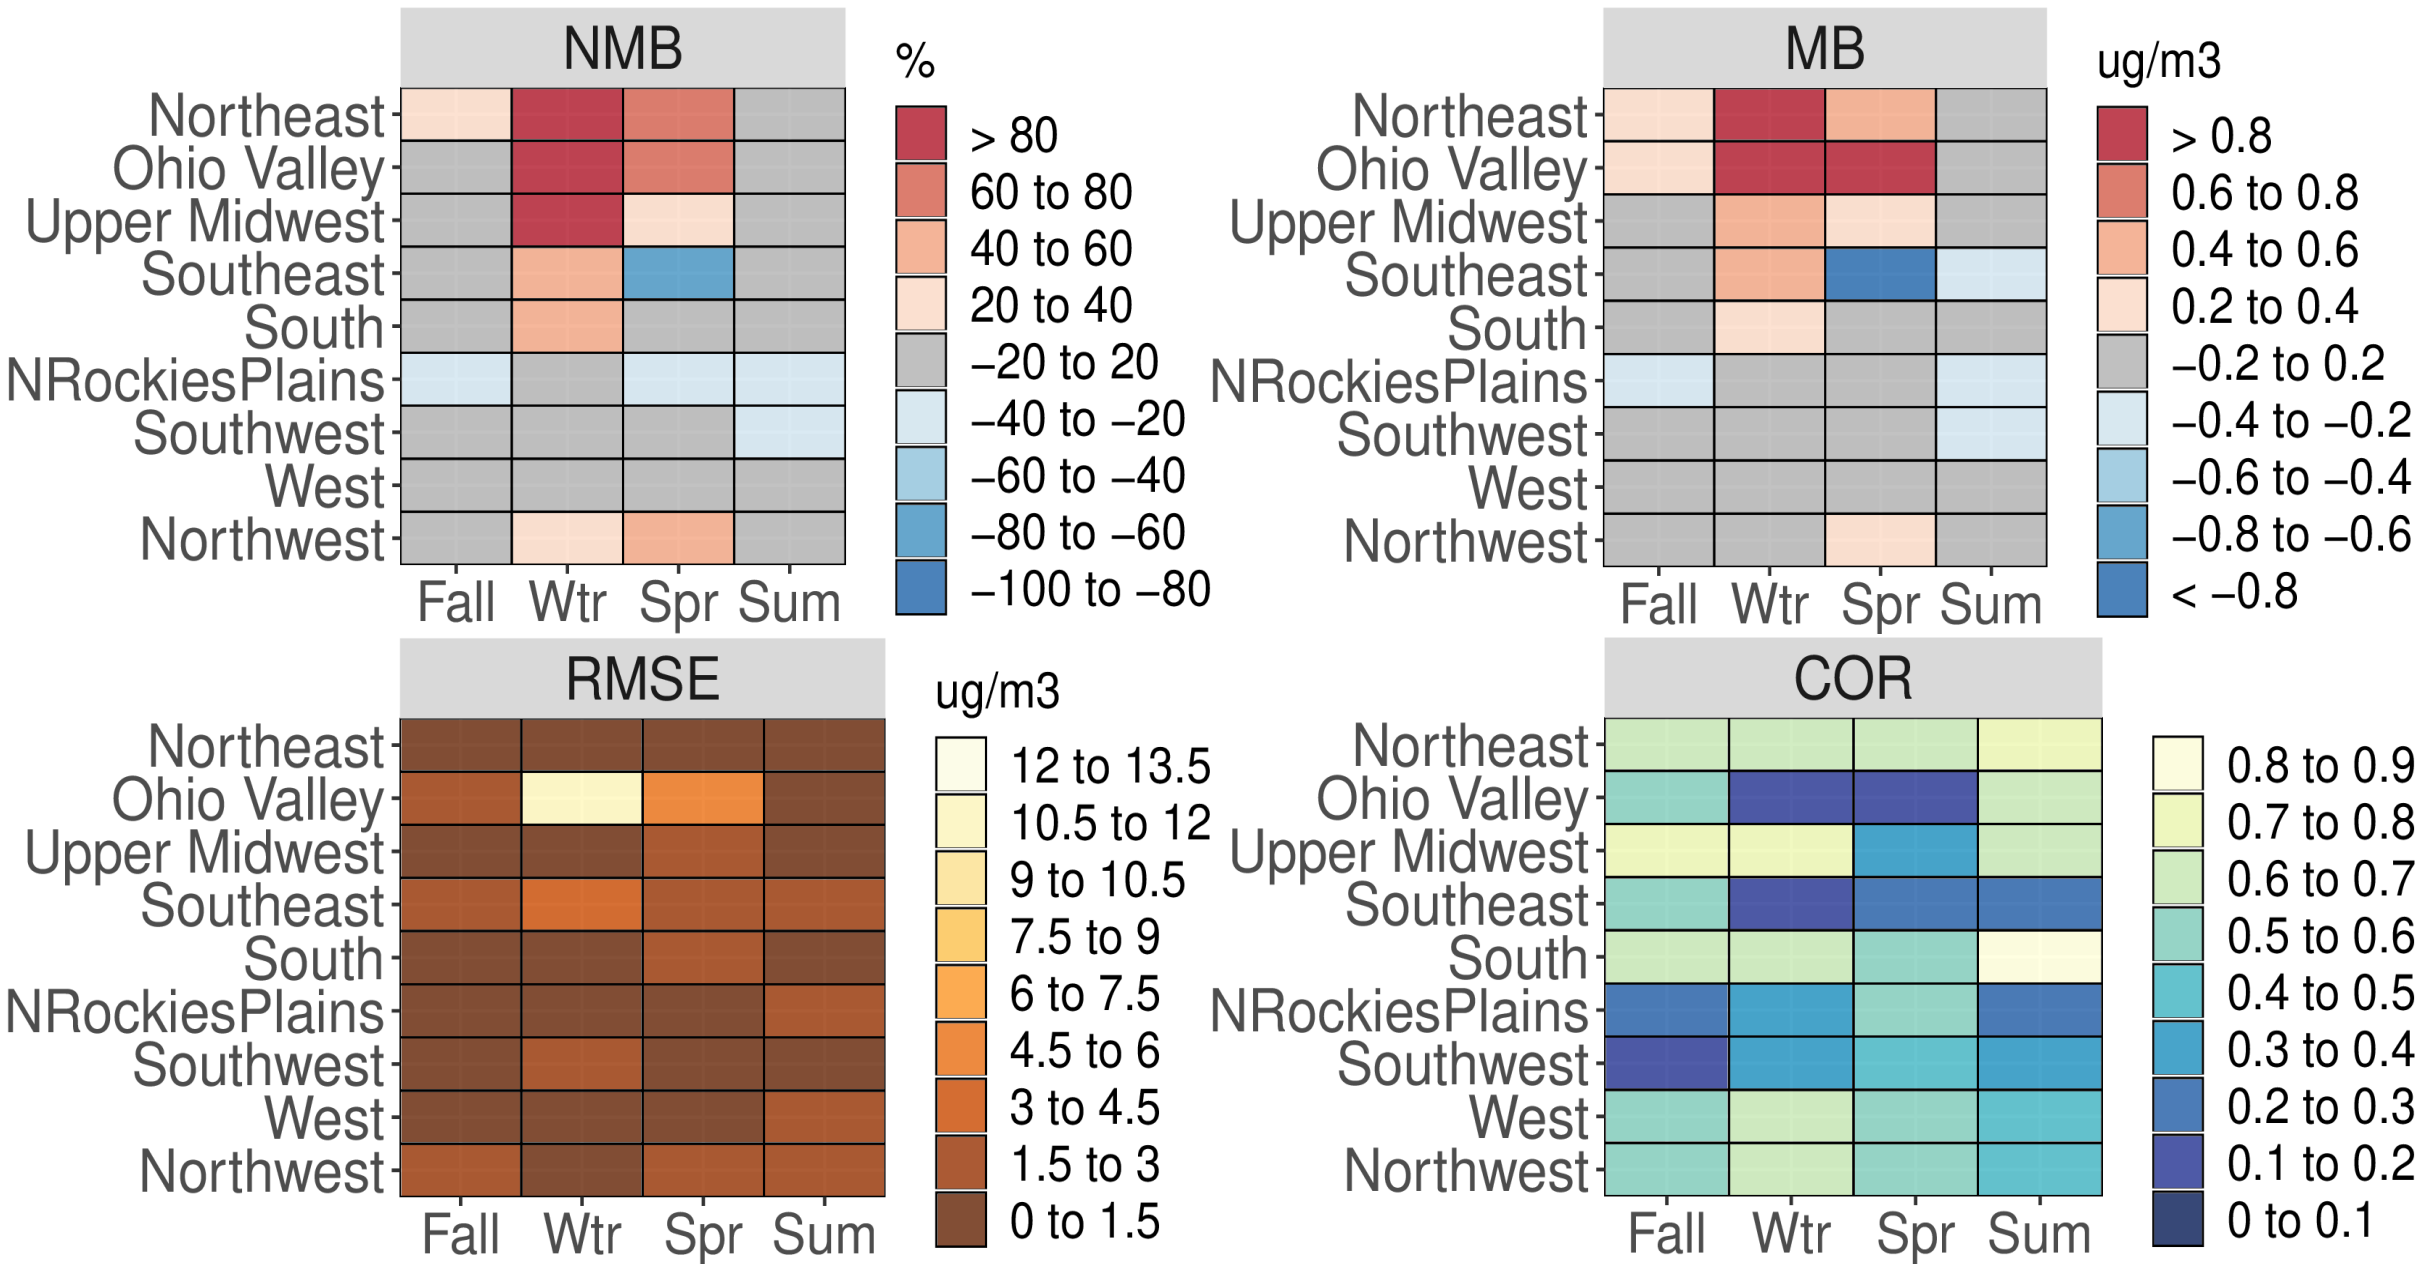

Figure S19. Categorical NMB (%), MB ( $\mu\text{g m}^{-3}$ ), RMSE ( $\mu\text{g m}^{-3}$ ), and Pearson correlation values for OC for all CSN sites based on season and NOAA climate region for the CMAQ521 simulation.

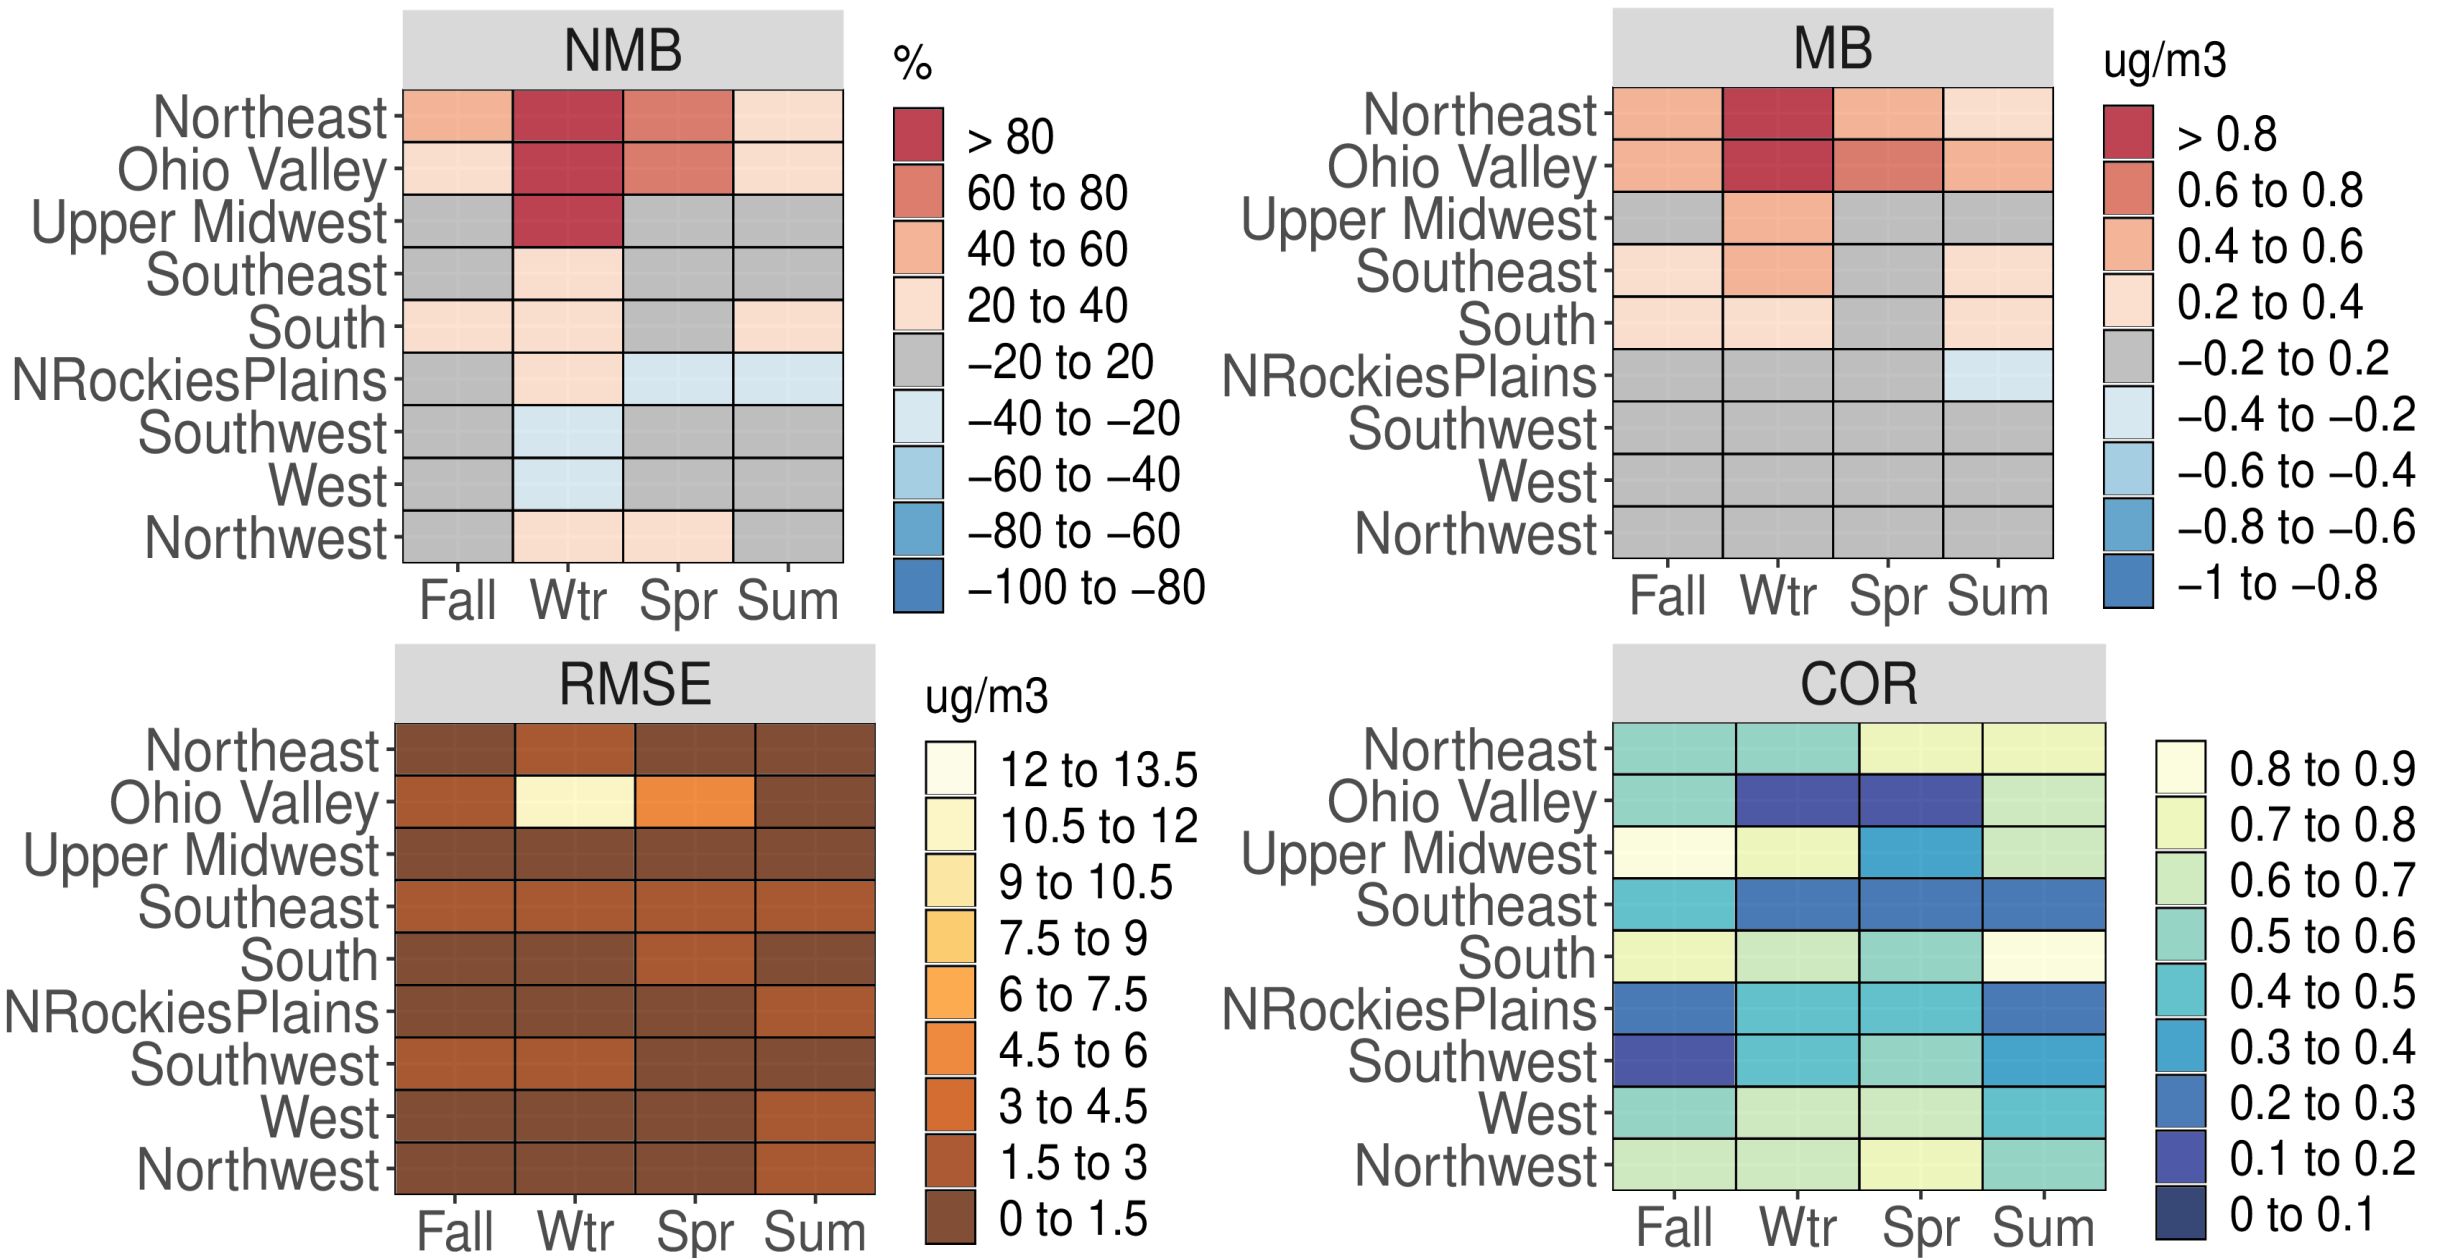

Figure S20. Categorical NMB (%), MB ( $\mu\text{g m}^{-3}$ ), RMSE ( $\mu\text{g m}^{-3}$ ), and Pearson correlation values for OC for all IMPROVE sites based on season and NOAA climate region for the CMAQ531\_WRF411\_M3Dry\_BiDi simulation.

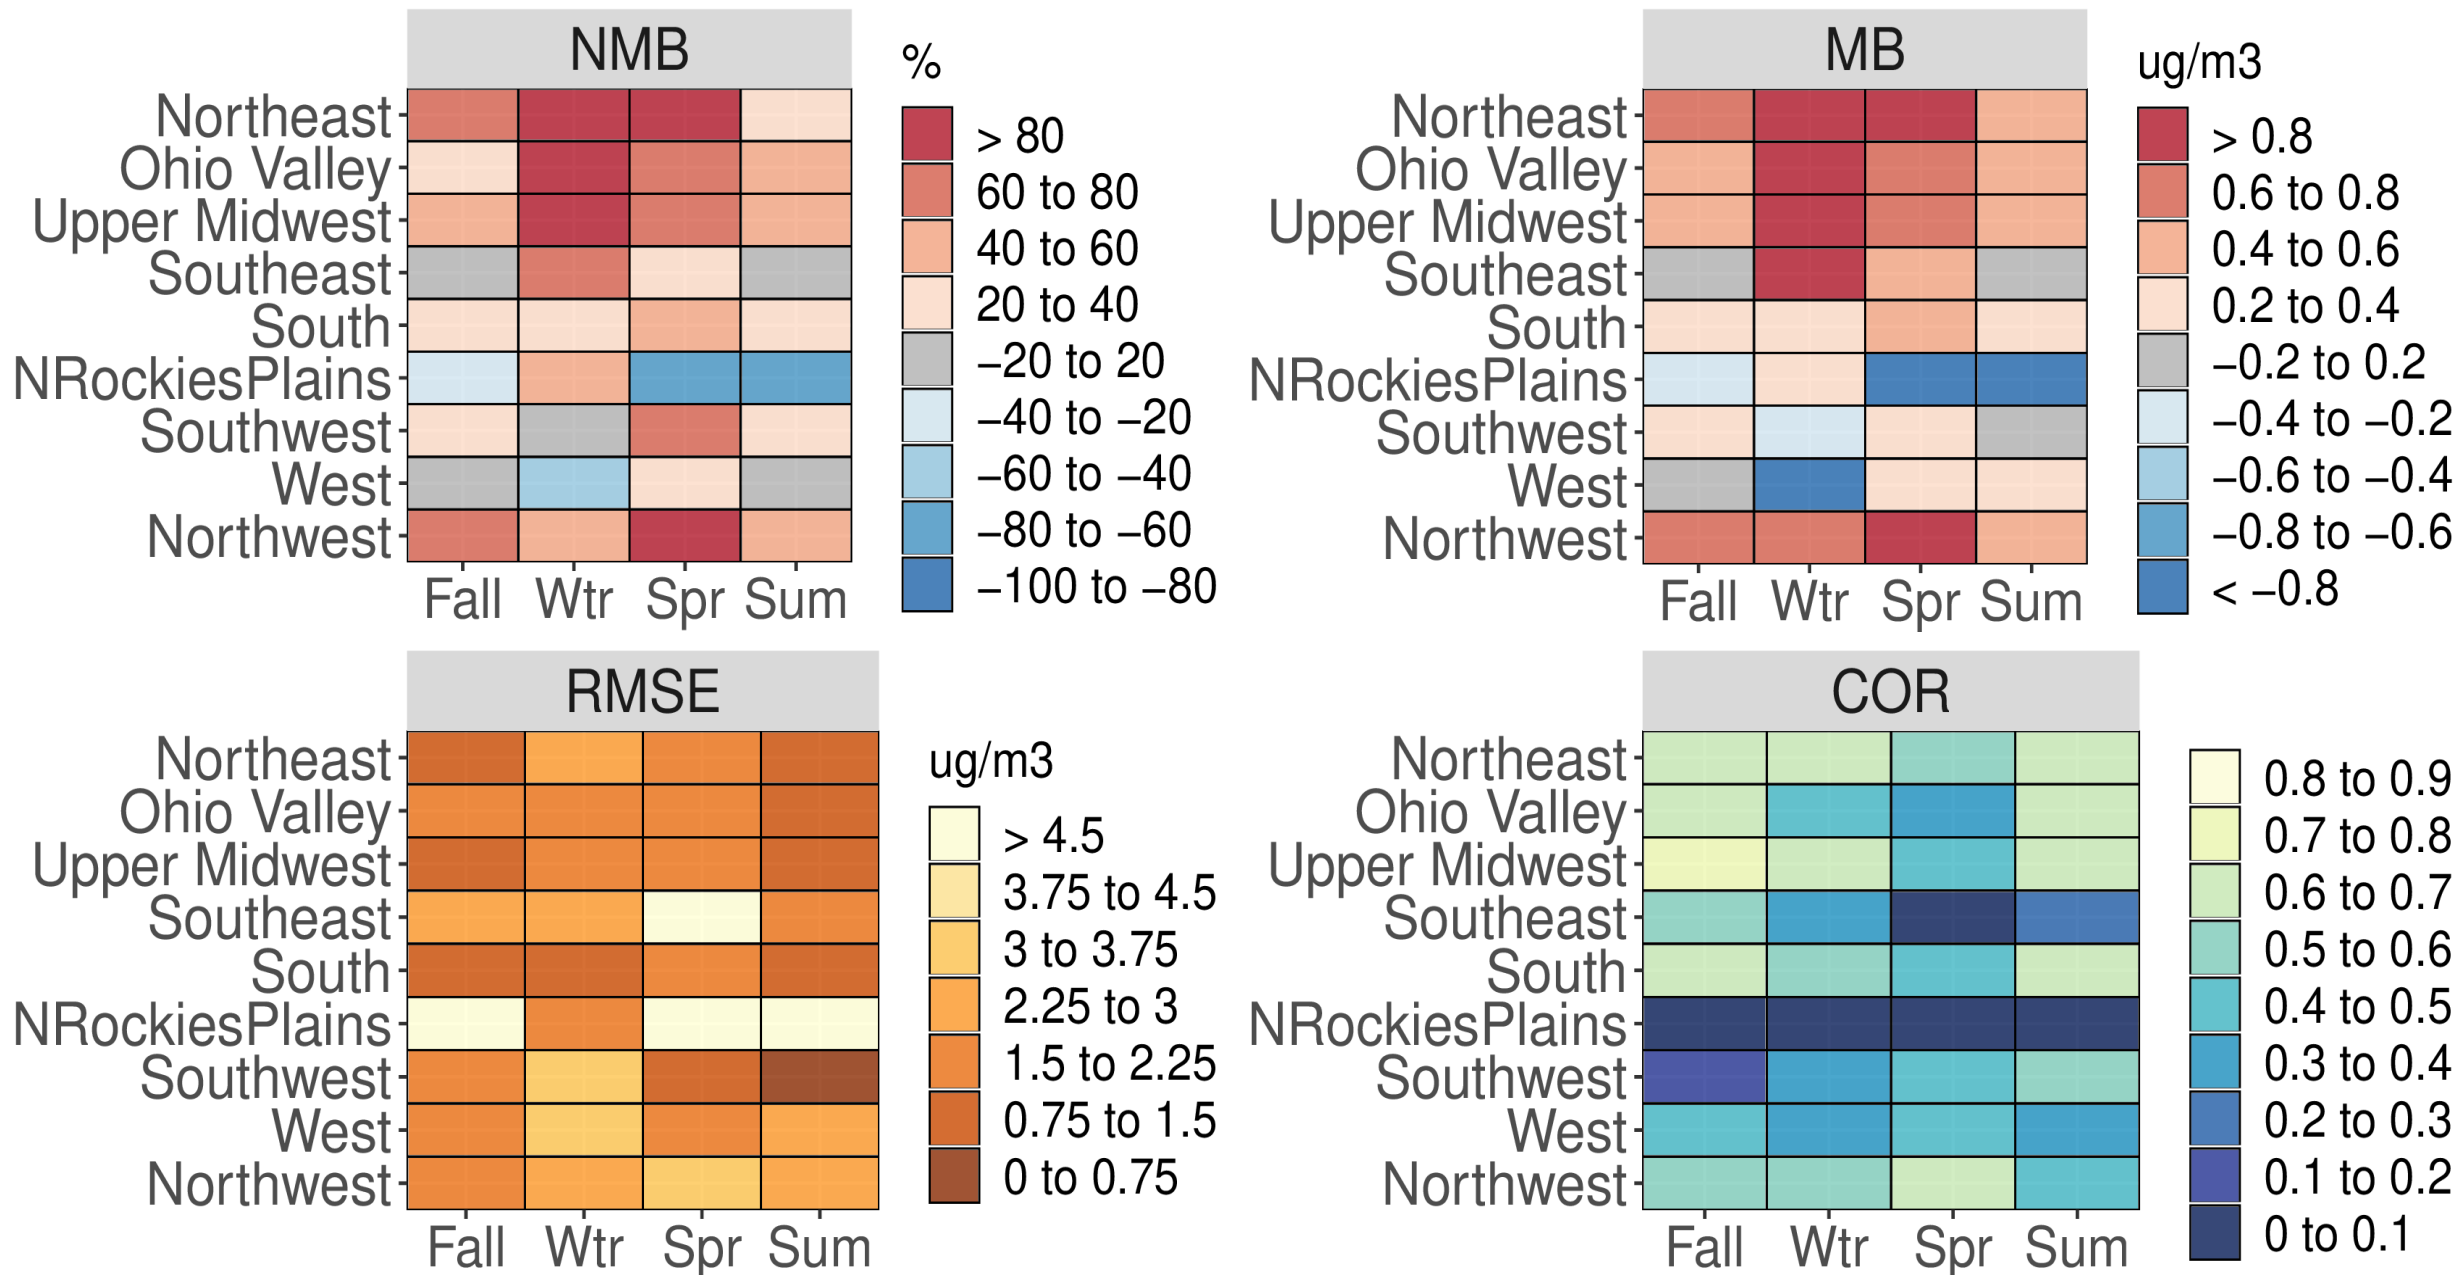

Figure S21. Categorical NMB (%), MB ( $\mu\text{g m}^{-3}$ ), RMSE ( $\mu\text{g m}^{-3}$ ), and Pearson correlation values for OC for all AQS sites based on season and NOAA climate region for the CMAQ521 simulation.



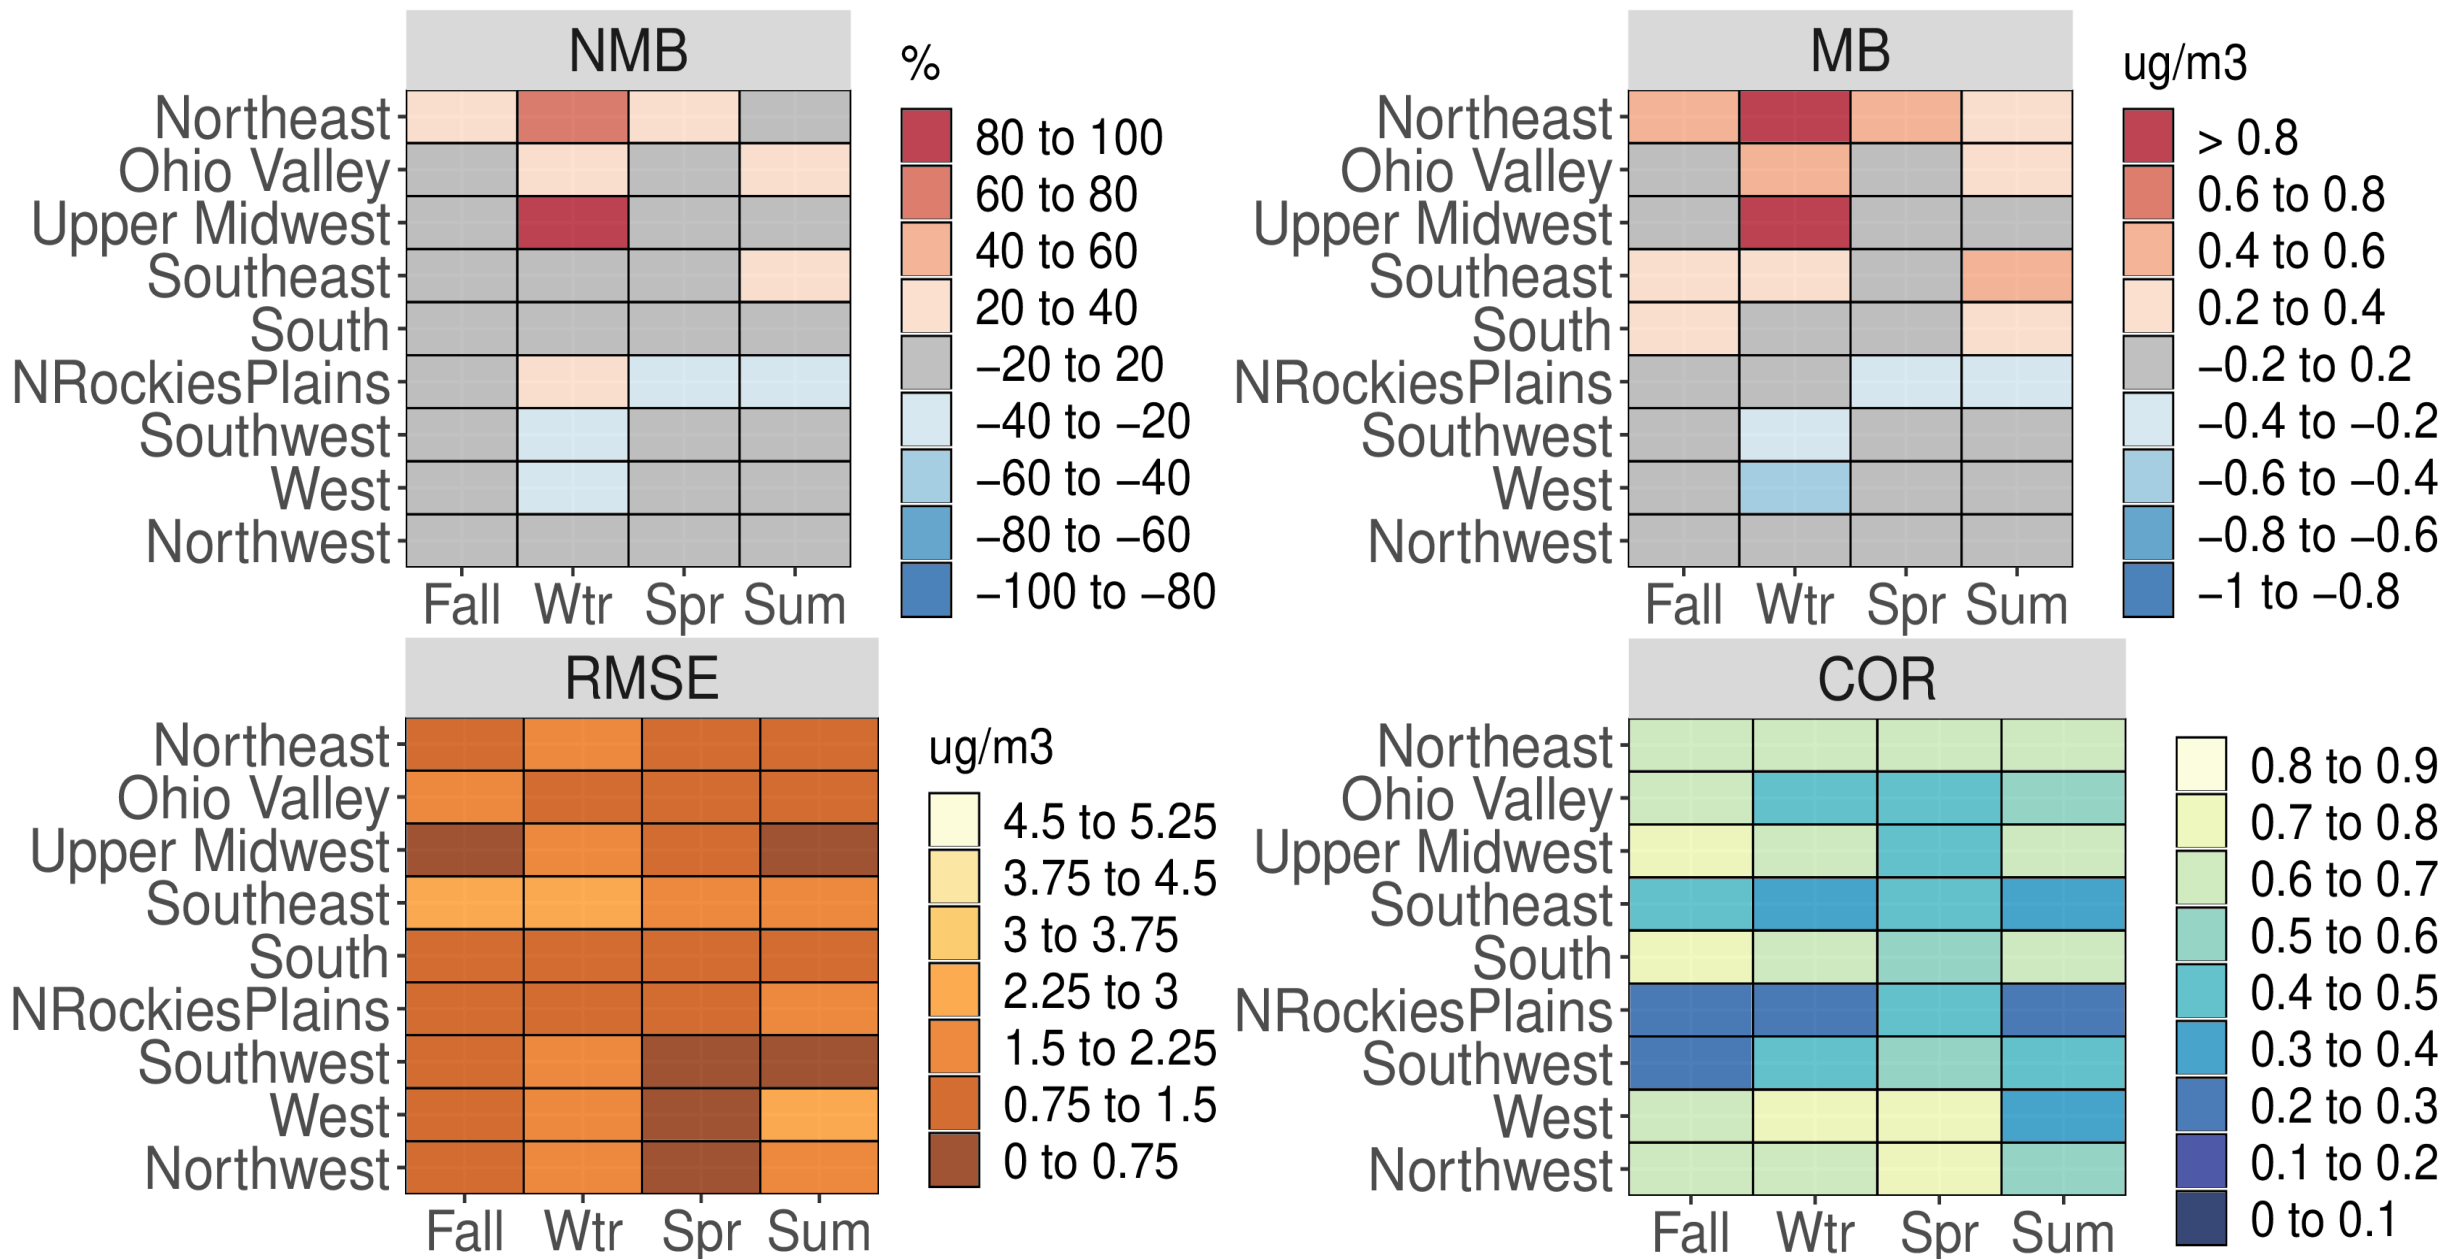

Figure S22. Categorical NMB (%), MB ( $\mu\text{g m}^{-3}$ ), RMSE ( $\mu\text{g m}^{-3}$ ), and Pearson correlation values for OC for all AQS sites based on season and NOAA climate region for the CMAQ531\_WRF411\_M3Dry\_BiDi simulation.



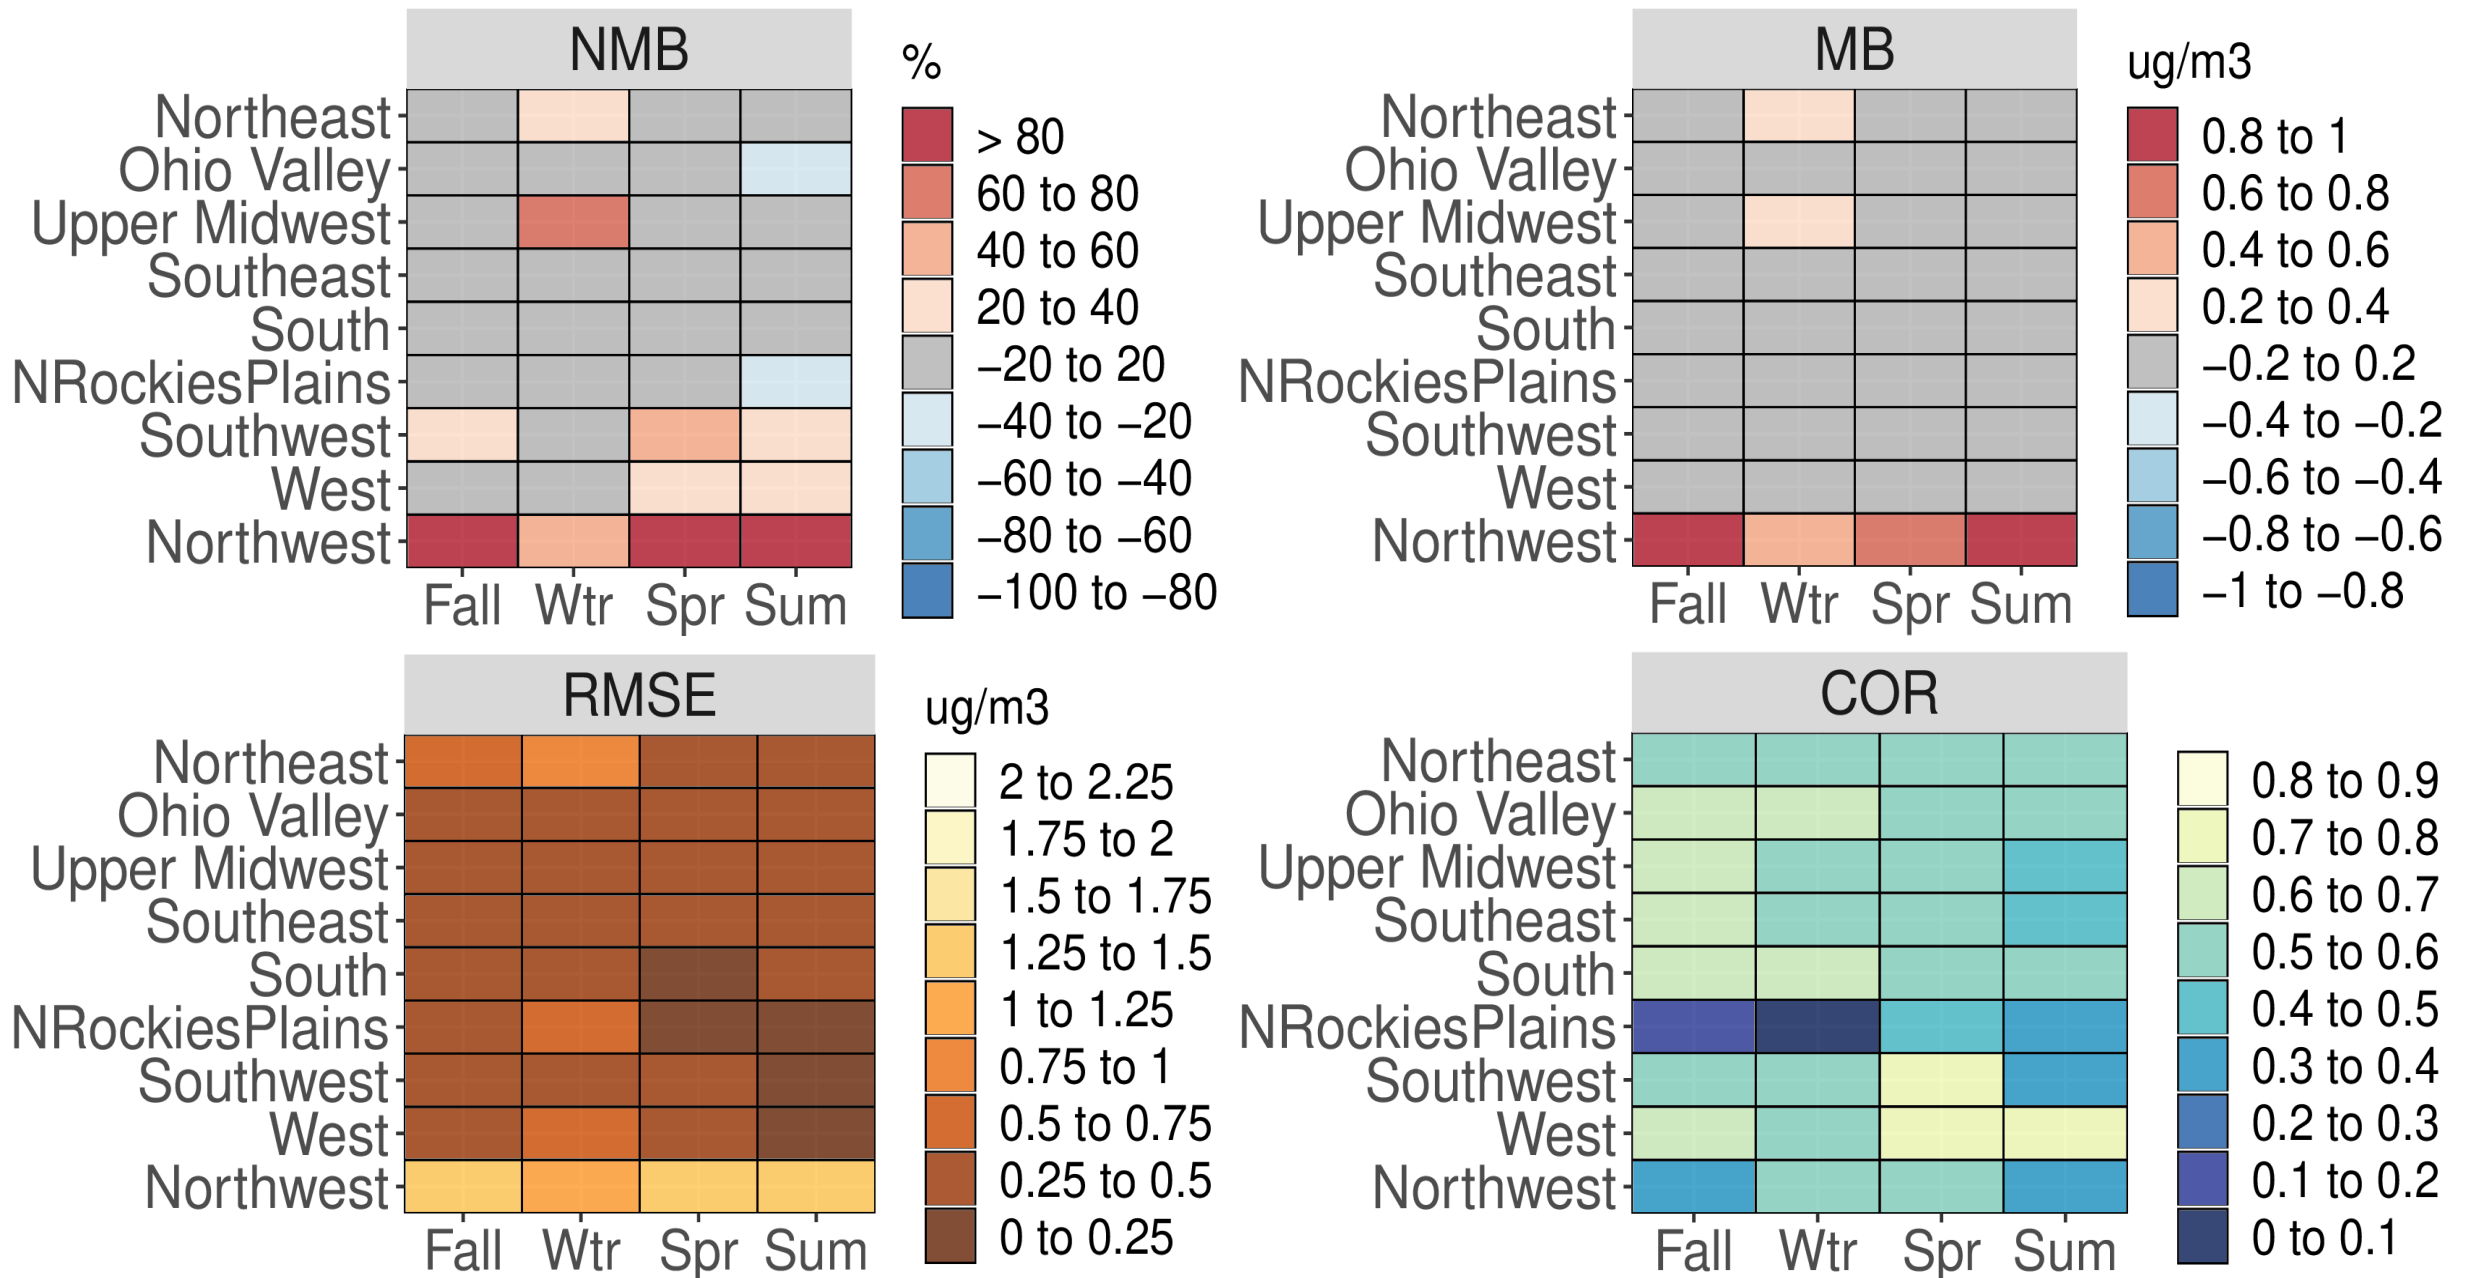

Figure S23. Categorical NMB (%), MB ( $\mu\text{g m}^{-3}$ ), RMSE ( $\mu\text{g m}^{-3}$ ), and Pearson correlation values for EC for all CSN sites based on season and NOAA climate region for the CMAQ521 simulation.

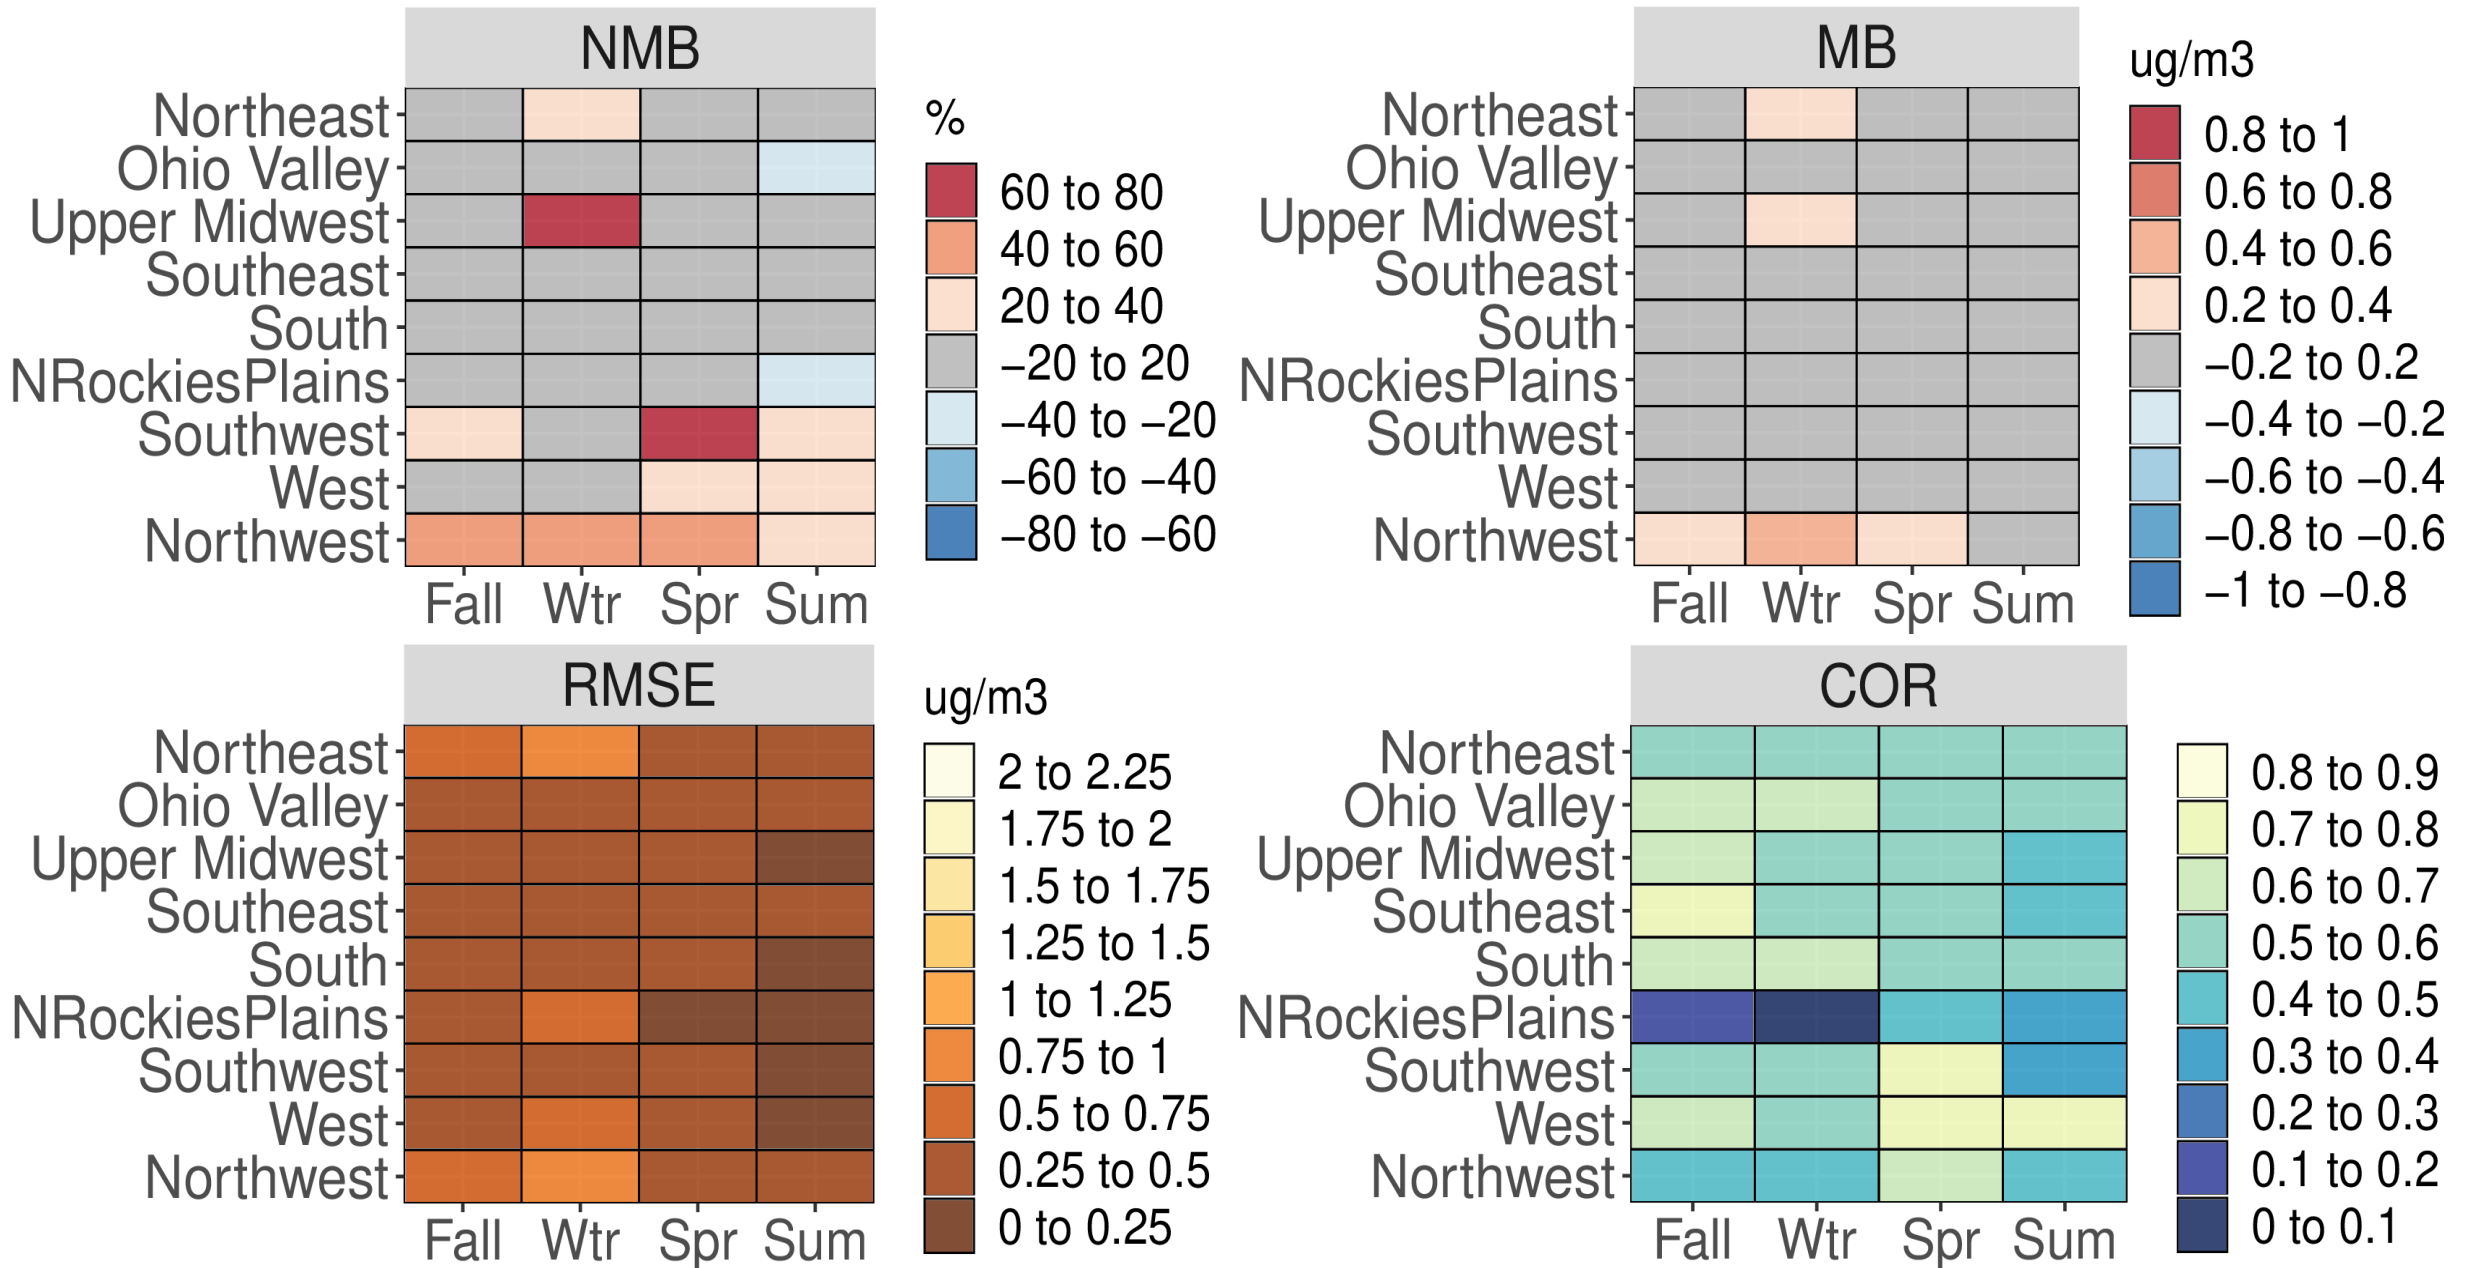

Figure S24. Categorical NMB (%), MB ( $\mu\text{g m}^{-3}$ ), RMSE ( $\mu\text{g m}^{-3}$ ), and Pearson correlation values for EC for all CSN sites based on season and NOAA climate region for the CMAQ531\_WRF411\_M3Dry\_BiDi simulation.

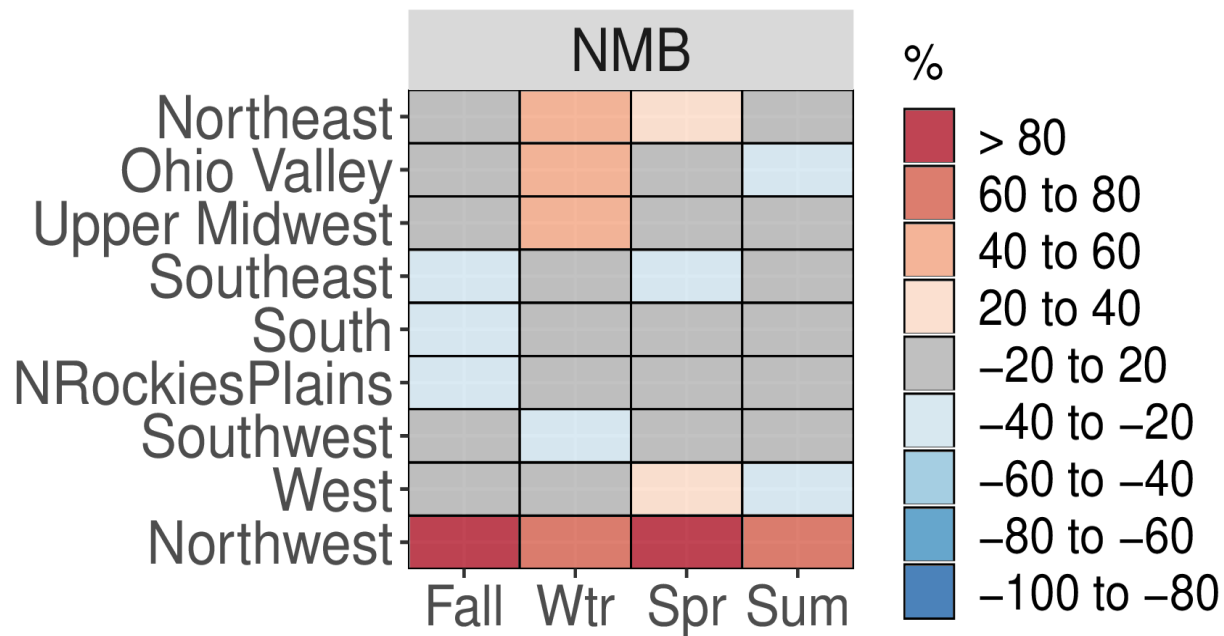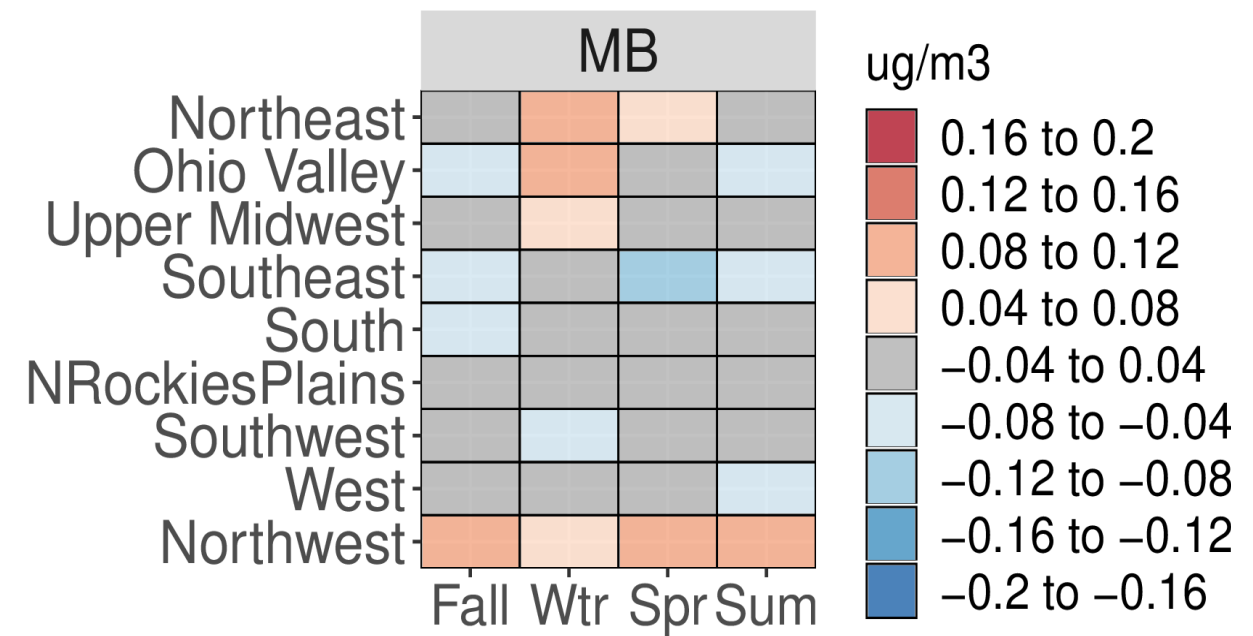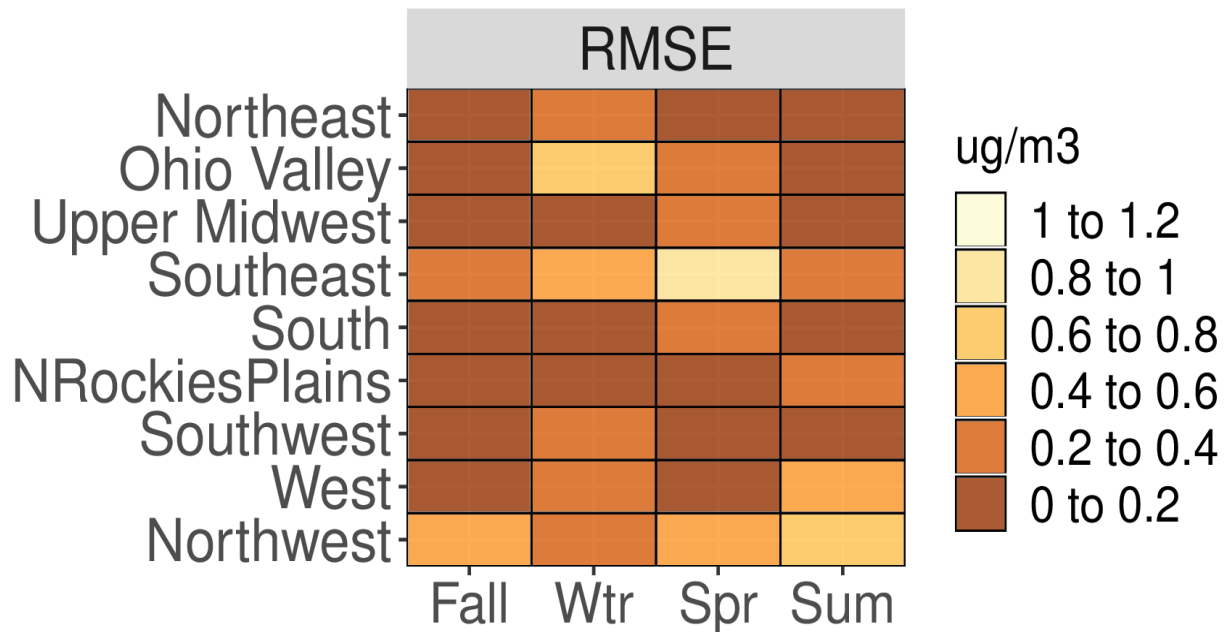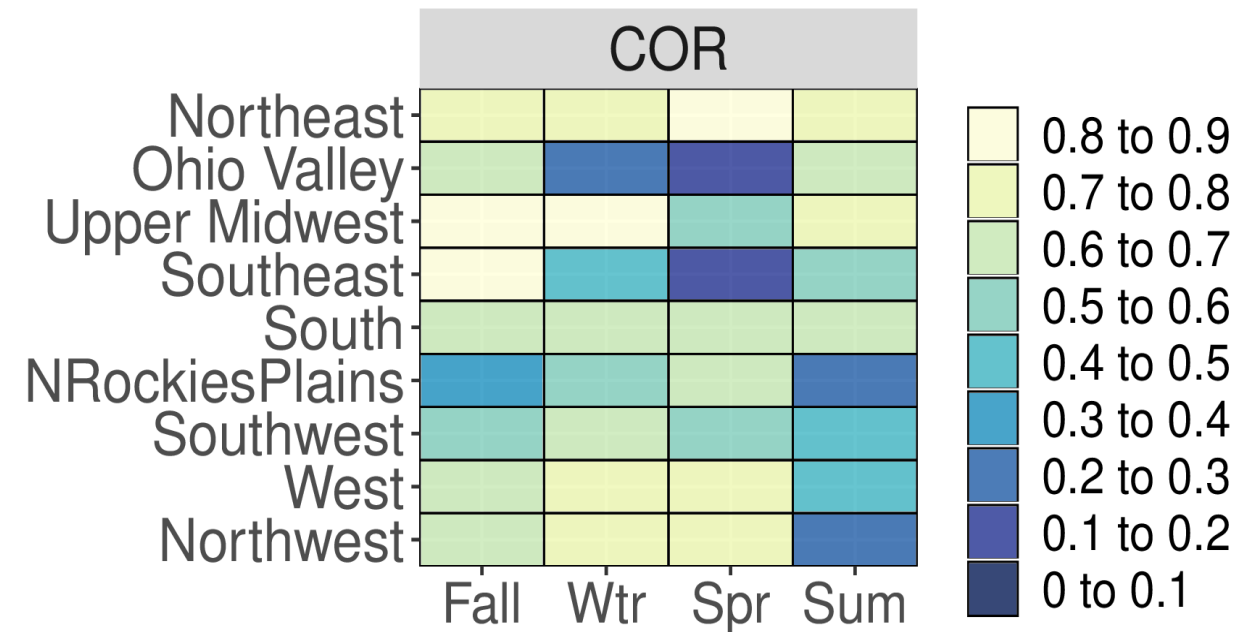

Figure S25. Categorical NMB (%), MB ( $\mu\text{g m}^{-3}$ ), RMSE ( $\mu\text{g m}^{-3}$ ), and Pearson correlation values for EC for all IMPROVE sites based on season and NOAA climate region for the CMAQ521 simulation.

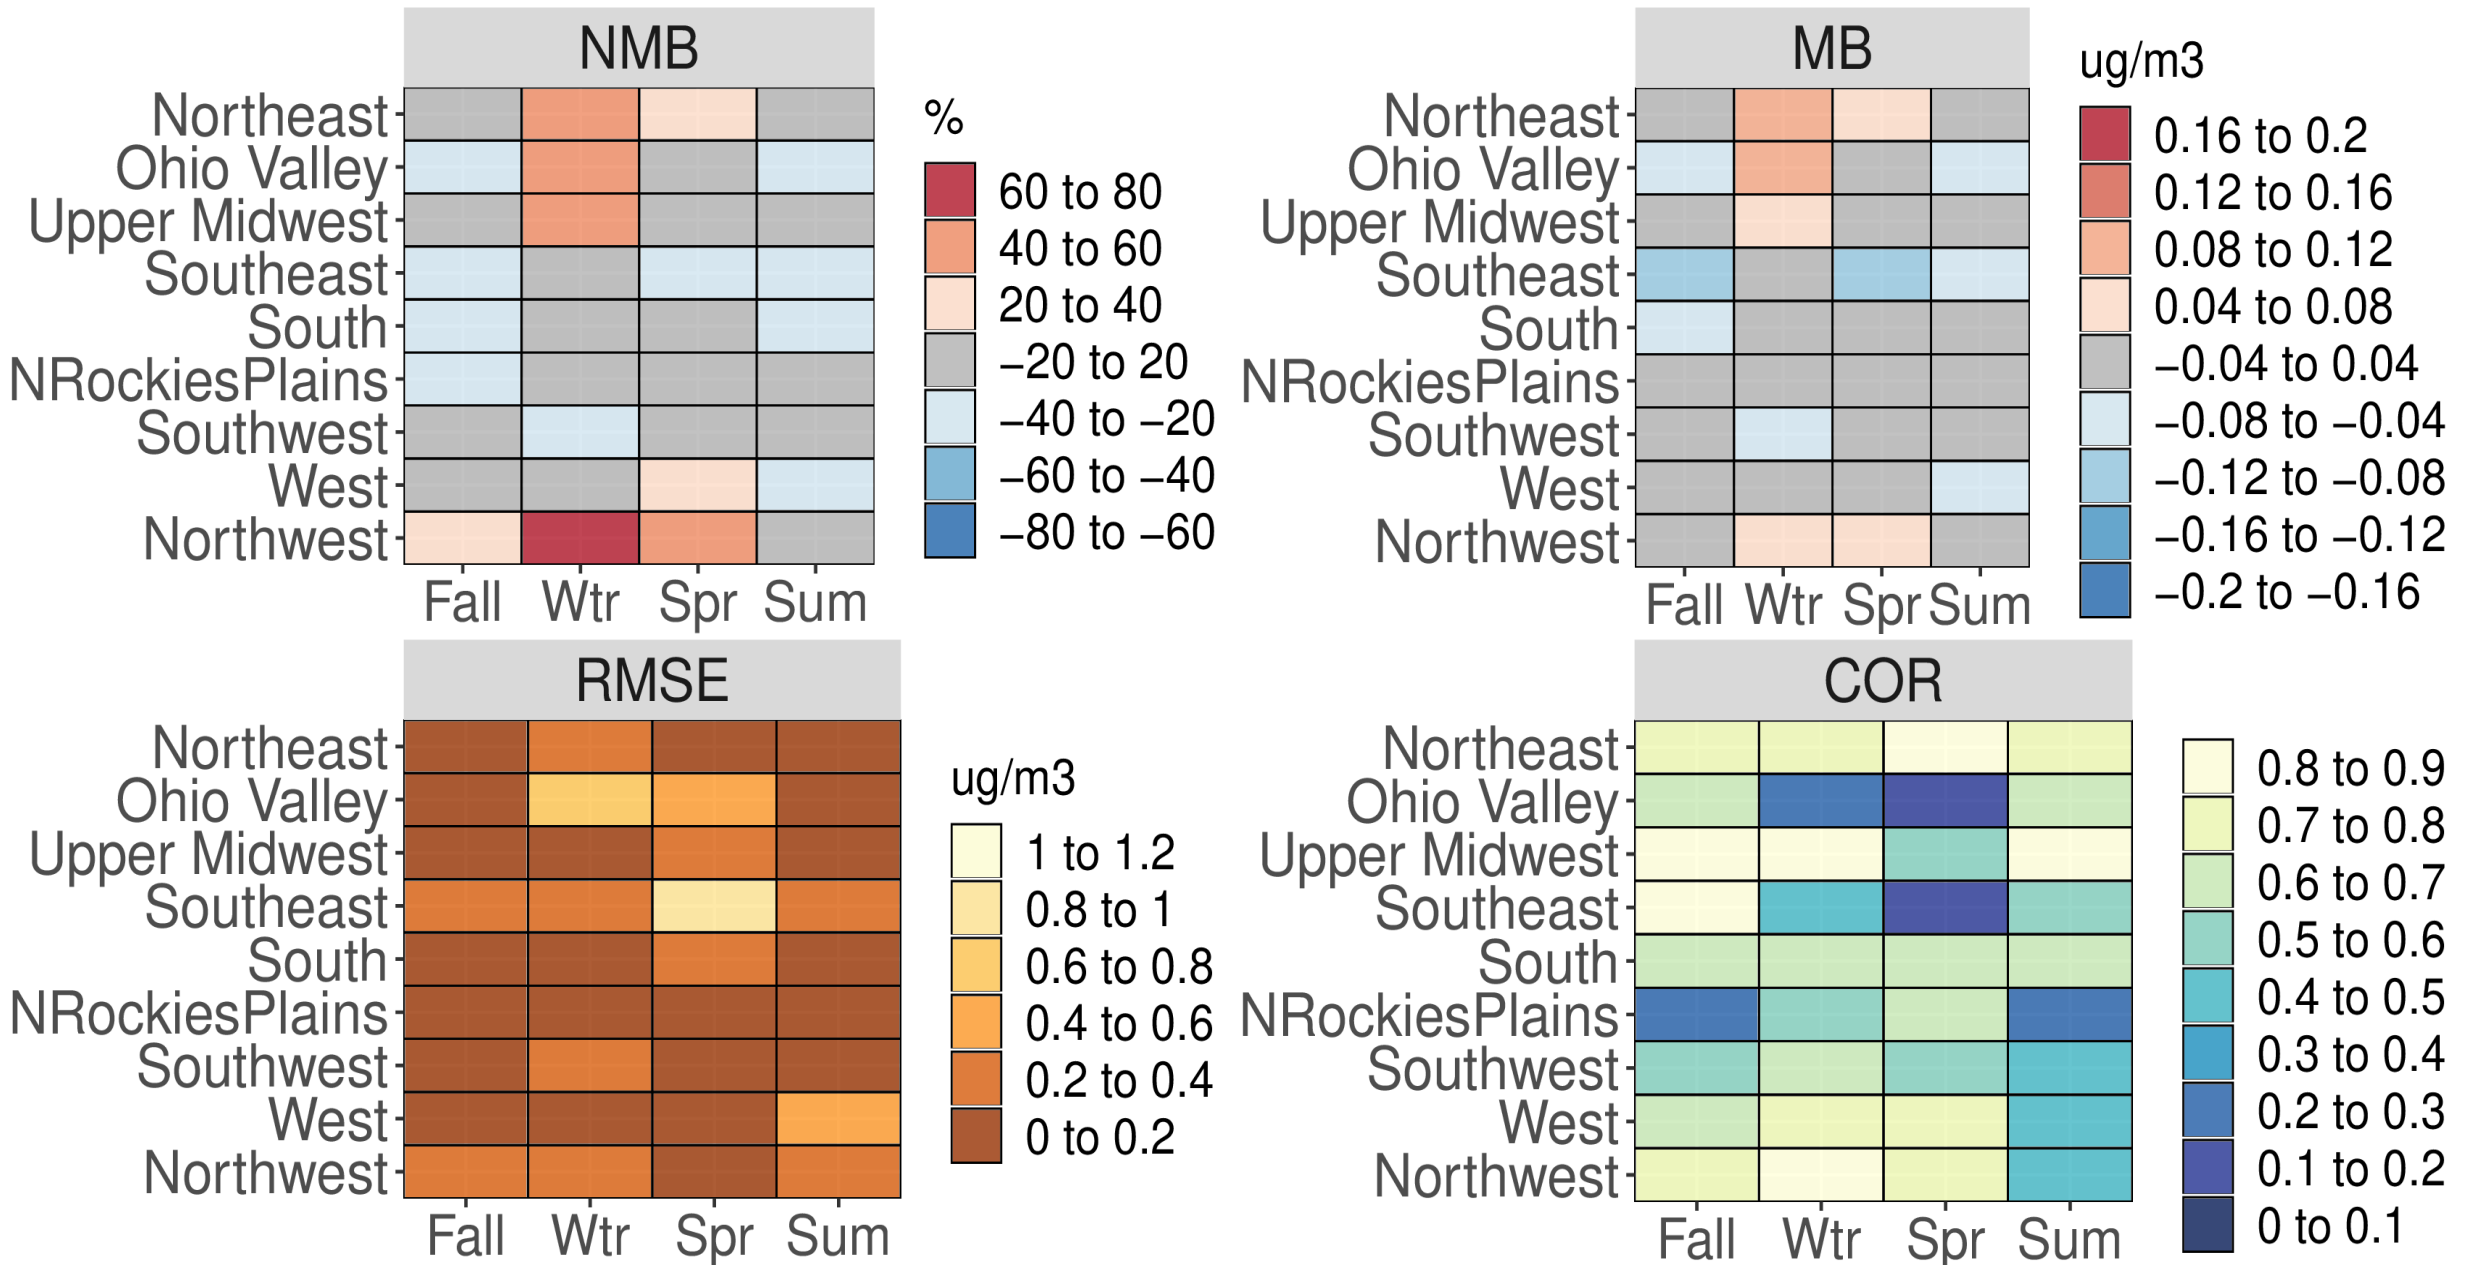

Figure S26. Categorical NMB (%), MB ( $\mu\text{g m}^{-3}$ ), RMSE ( $\mu\text{g m}^{-3}$ ), and Pearson correlation values for EC for all IMPROVE sites based on season and NOAA climate region for the CMAQ531\_WRF411\_M3Dry\_BiDi simulation.

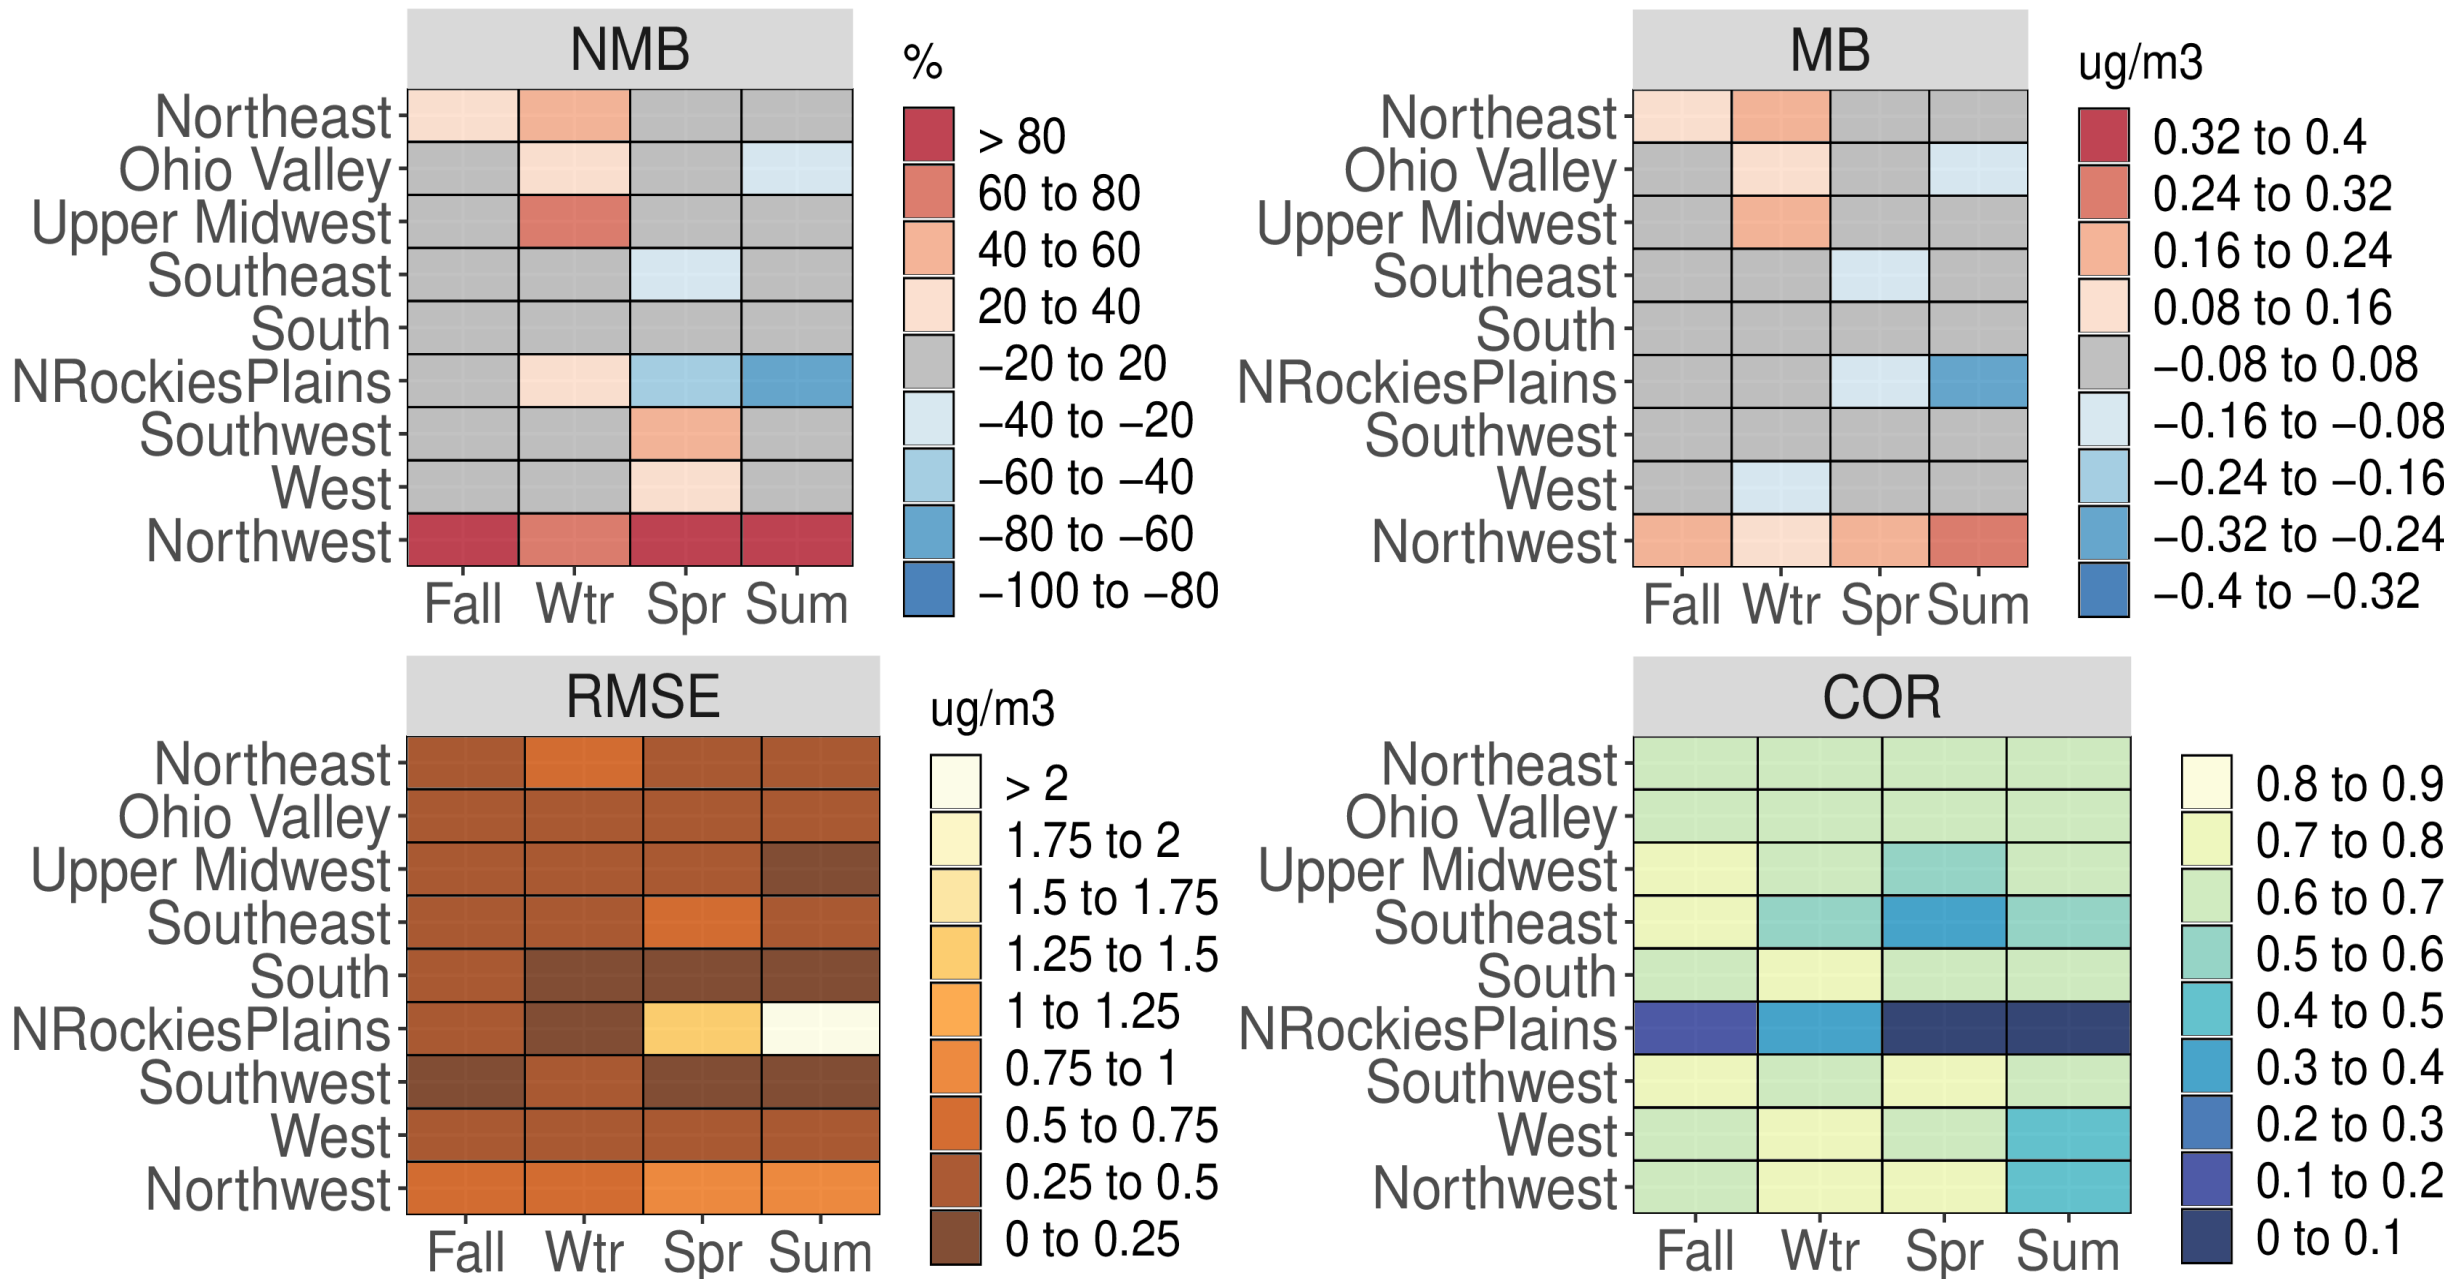

Figure S27. Categorical NMB (%), MB ( $\mu\text{g m}^{-3}$ ), RMSE ( $\mu\text{g m}^{-3}$ ), and Pearson correlation values for EC for all AQS sites based on season and NOAA climate region for the CMAQ521 simulation.

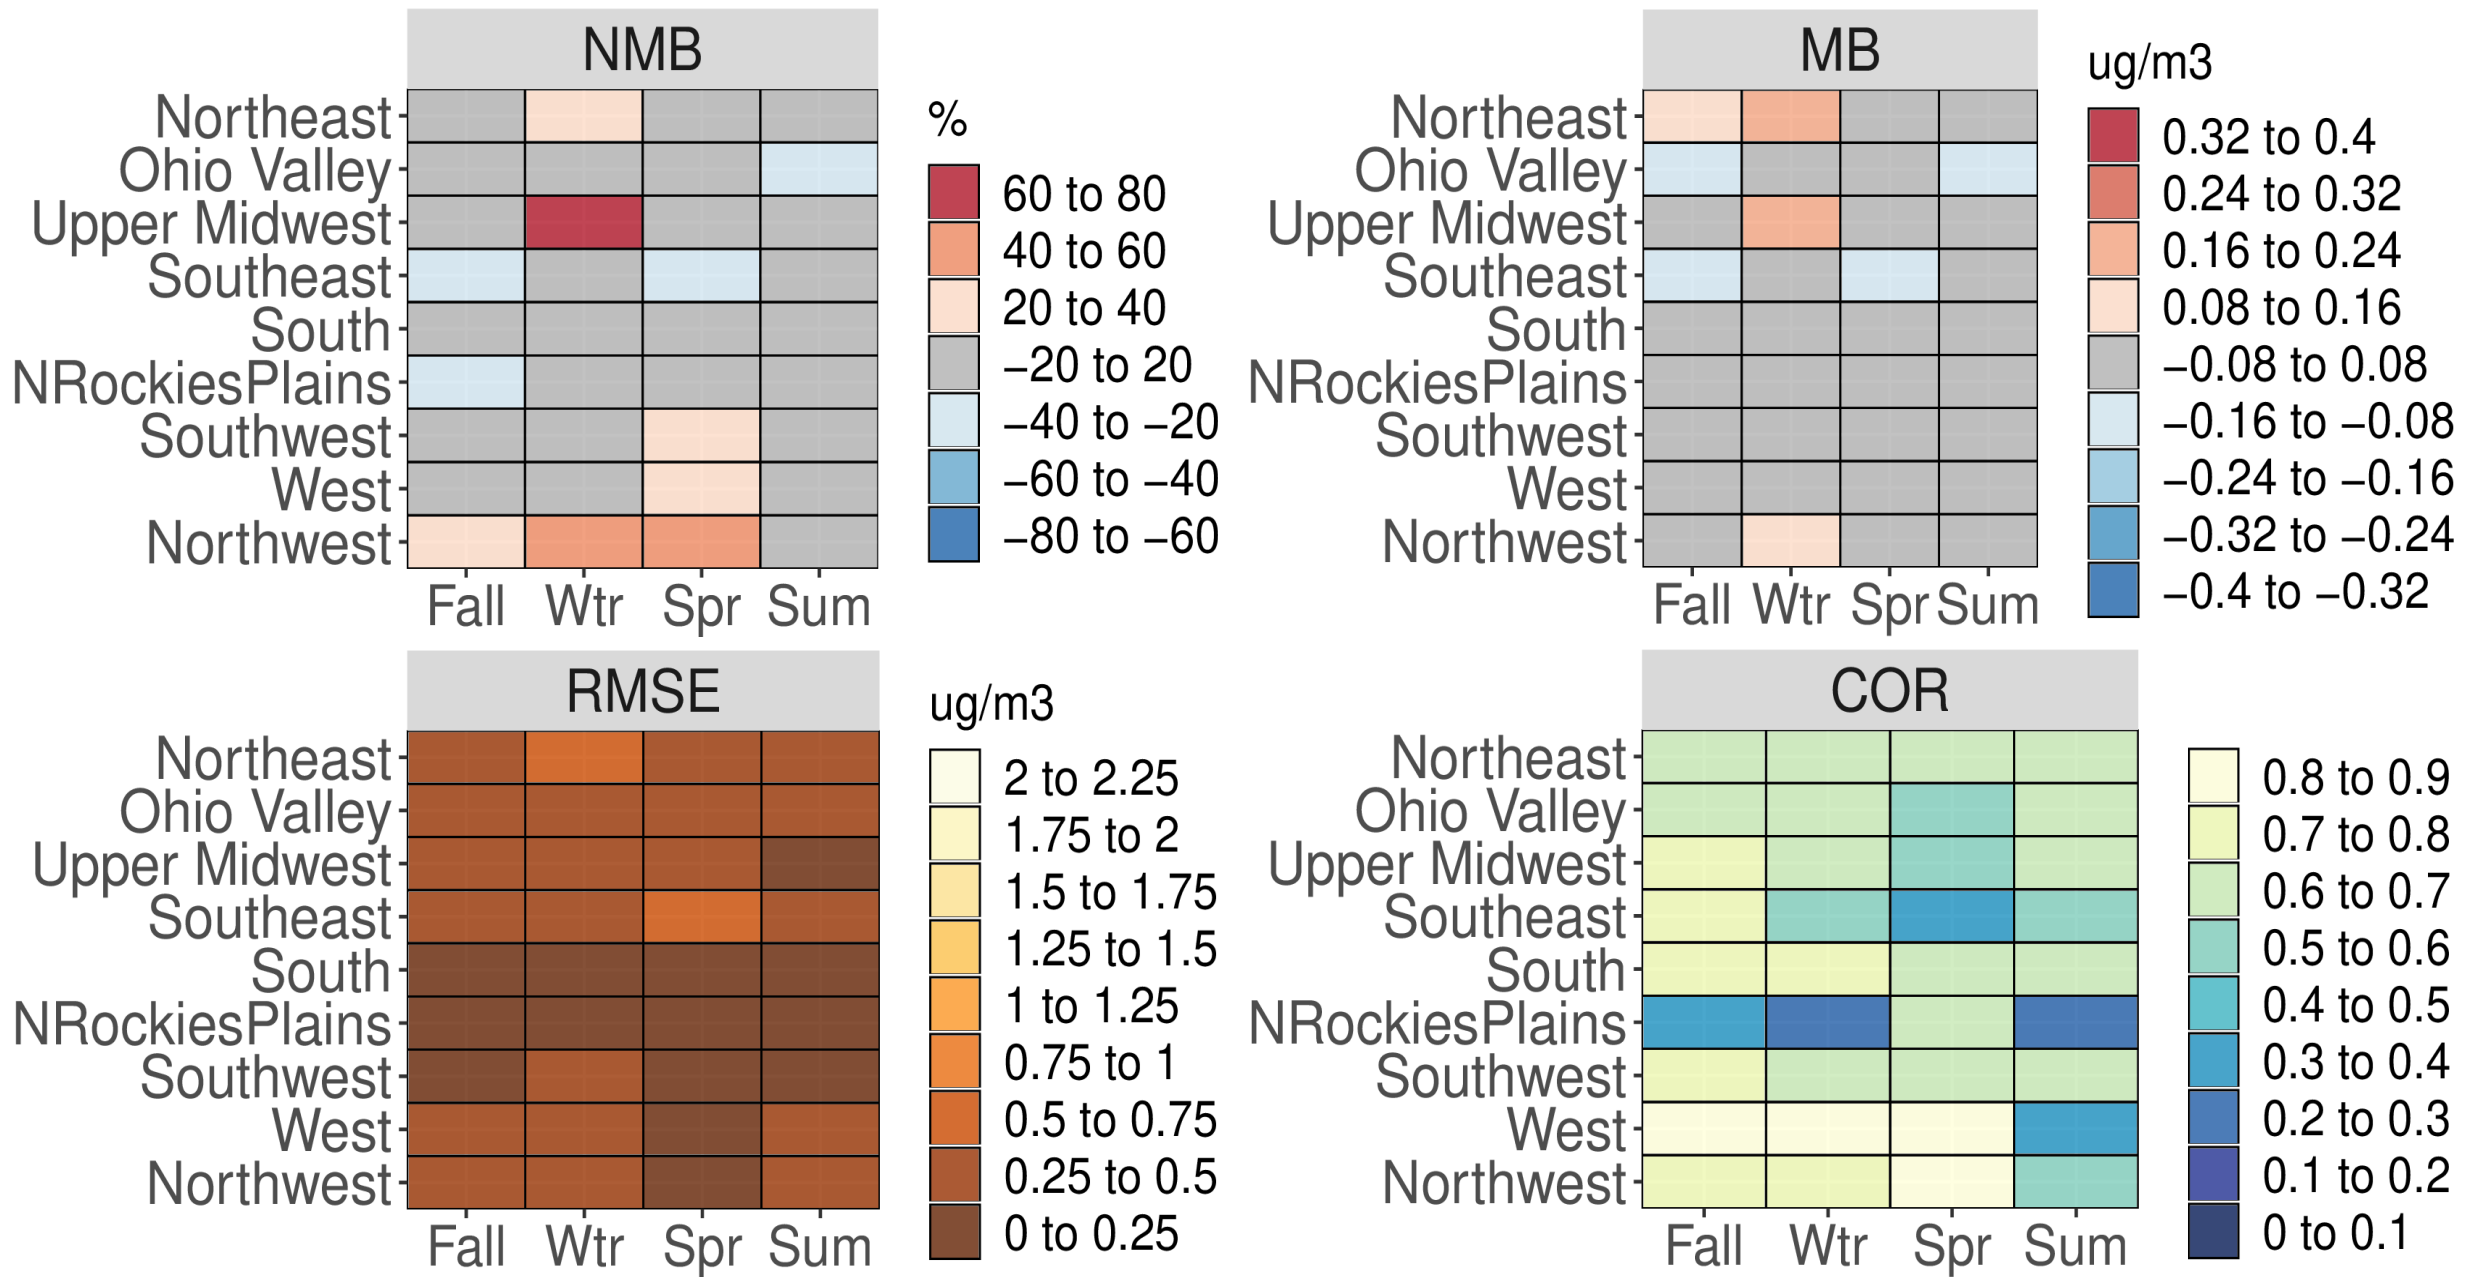

Figure S28. Categorical NMB (%), MB ( $\mu\text{g m}^{-3}$ ), RMSE ( $\mu\text{g m}^{-3}$ ), and Pearson correlation values for EC for all AQS sites based on season and NOAA climate region for the CMAQ531\_WRF411\_M3Dry\_BiDi simulation.



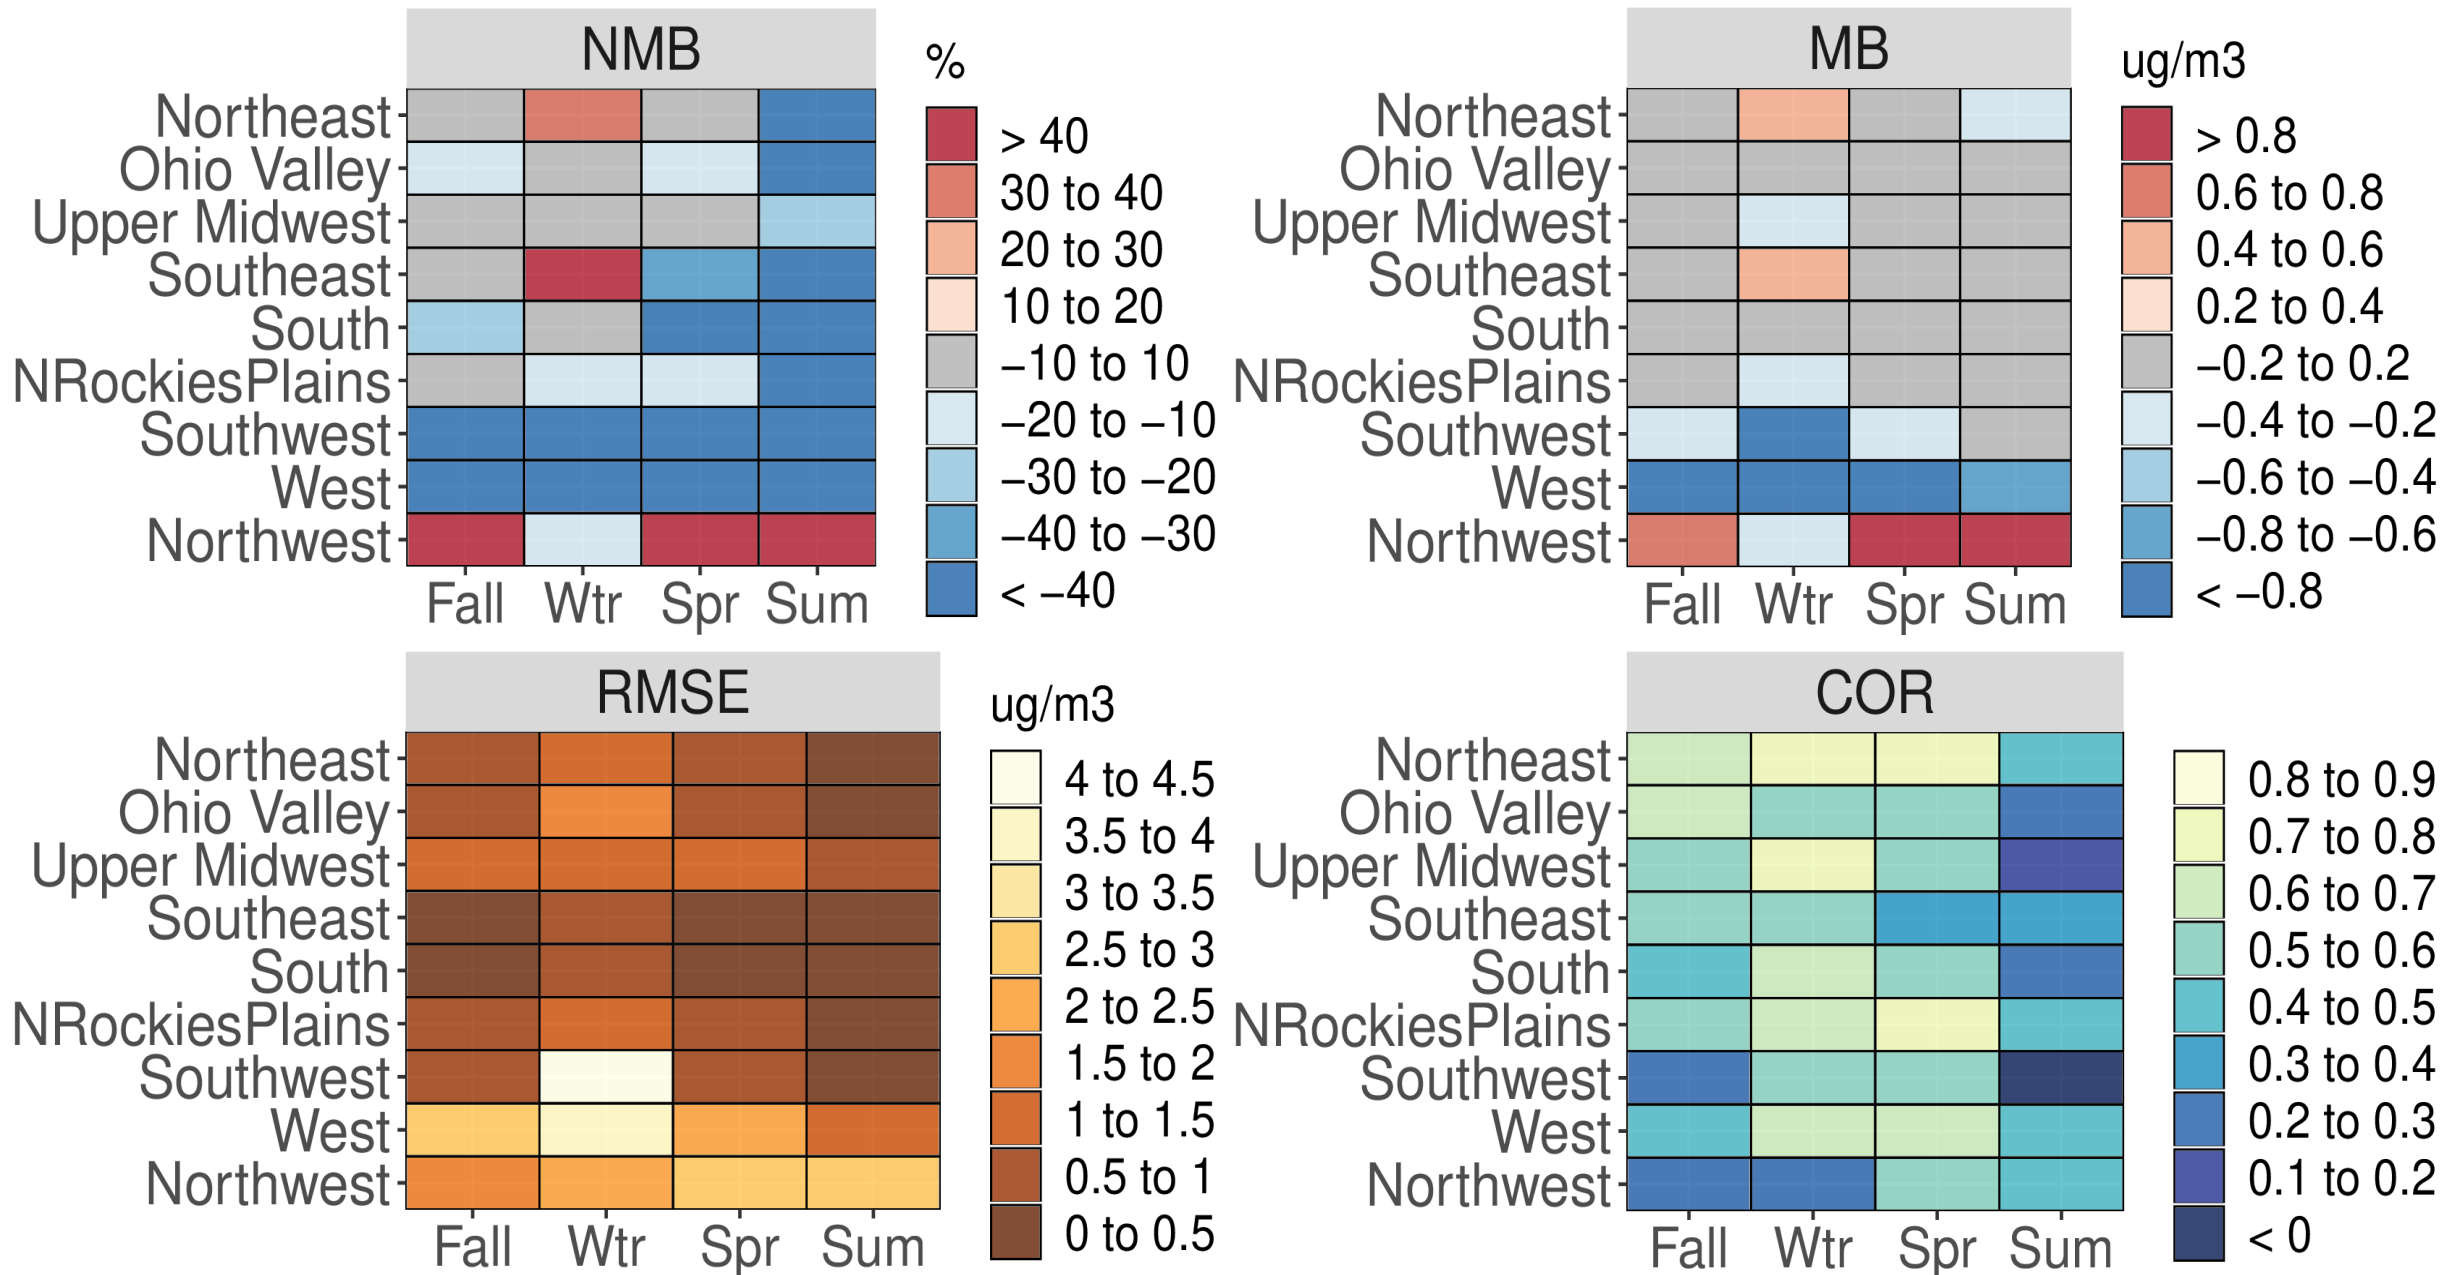

Figure S29. Categorical NMB (%), MB ( $\mu\text{g}/\text{m}^3$ ), RMSE ( $\mu\text{g}/\text{m}^3$ ), and Pearson correlation values for  $\text{NO}_3^-$  for all CSN sites based on season and NOAA climate region for the CMAQ521 simulation.

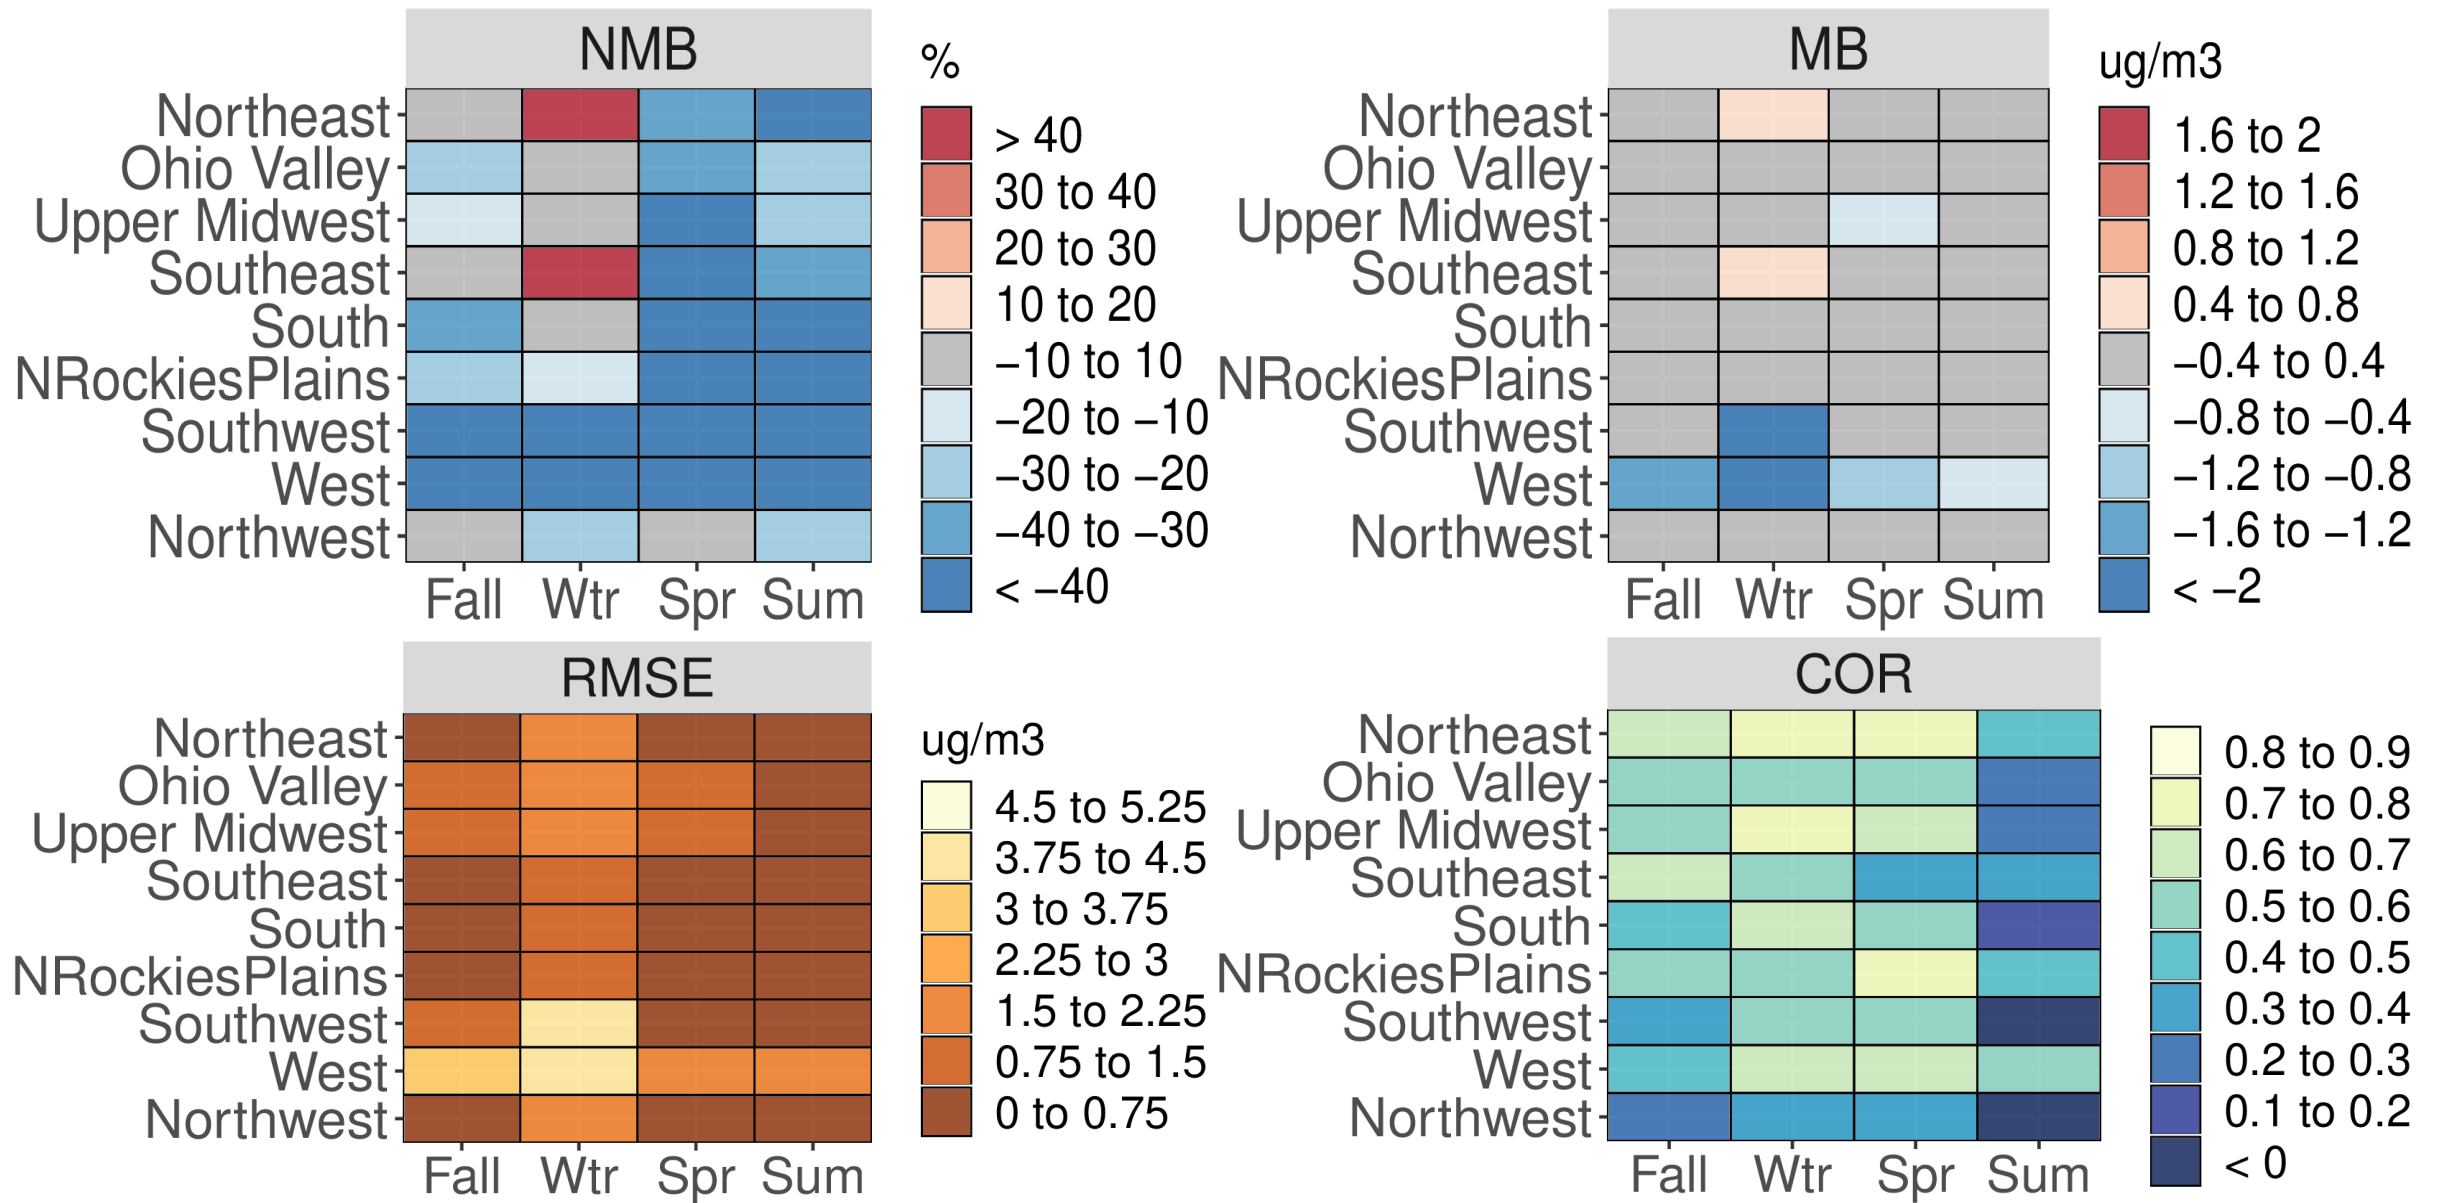

Figure S30. Categorical NMB (%), MB ( $\mu\text{g m}^{-3}$ ), RMSE ( $\mu\text{g m}^{-3}$ ), and Pearson correlation values for  $\text{NO}_3^-$  for all CSN sites based on season and NOAA climate region for the CMAQ531\_WRF411\_M3Dry\_BiDi simulation.



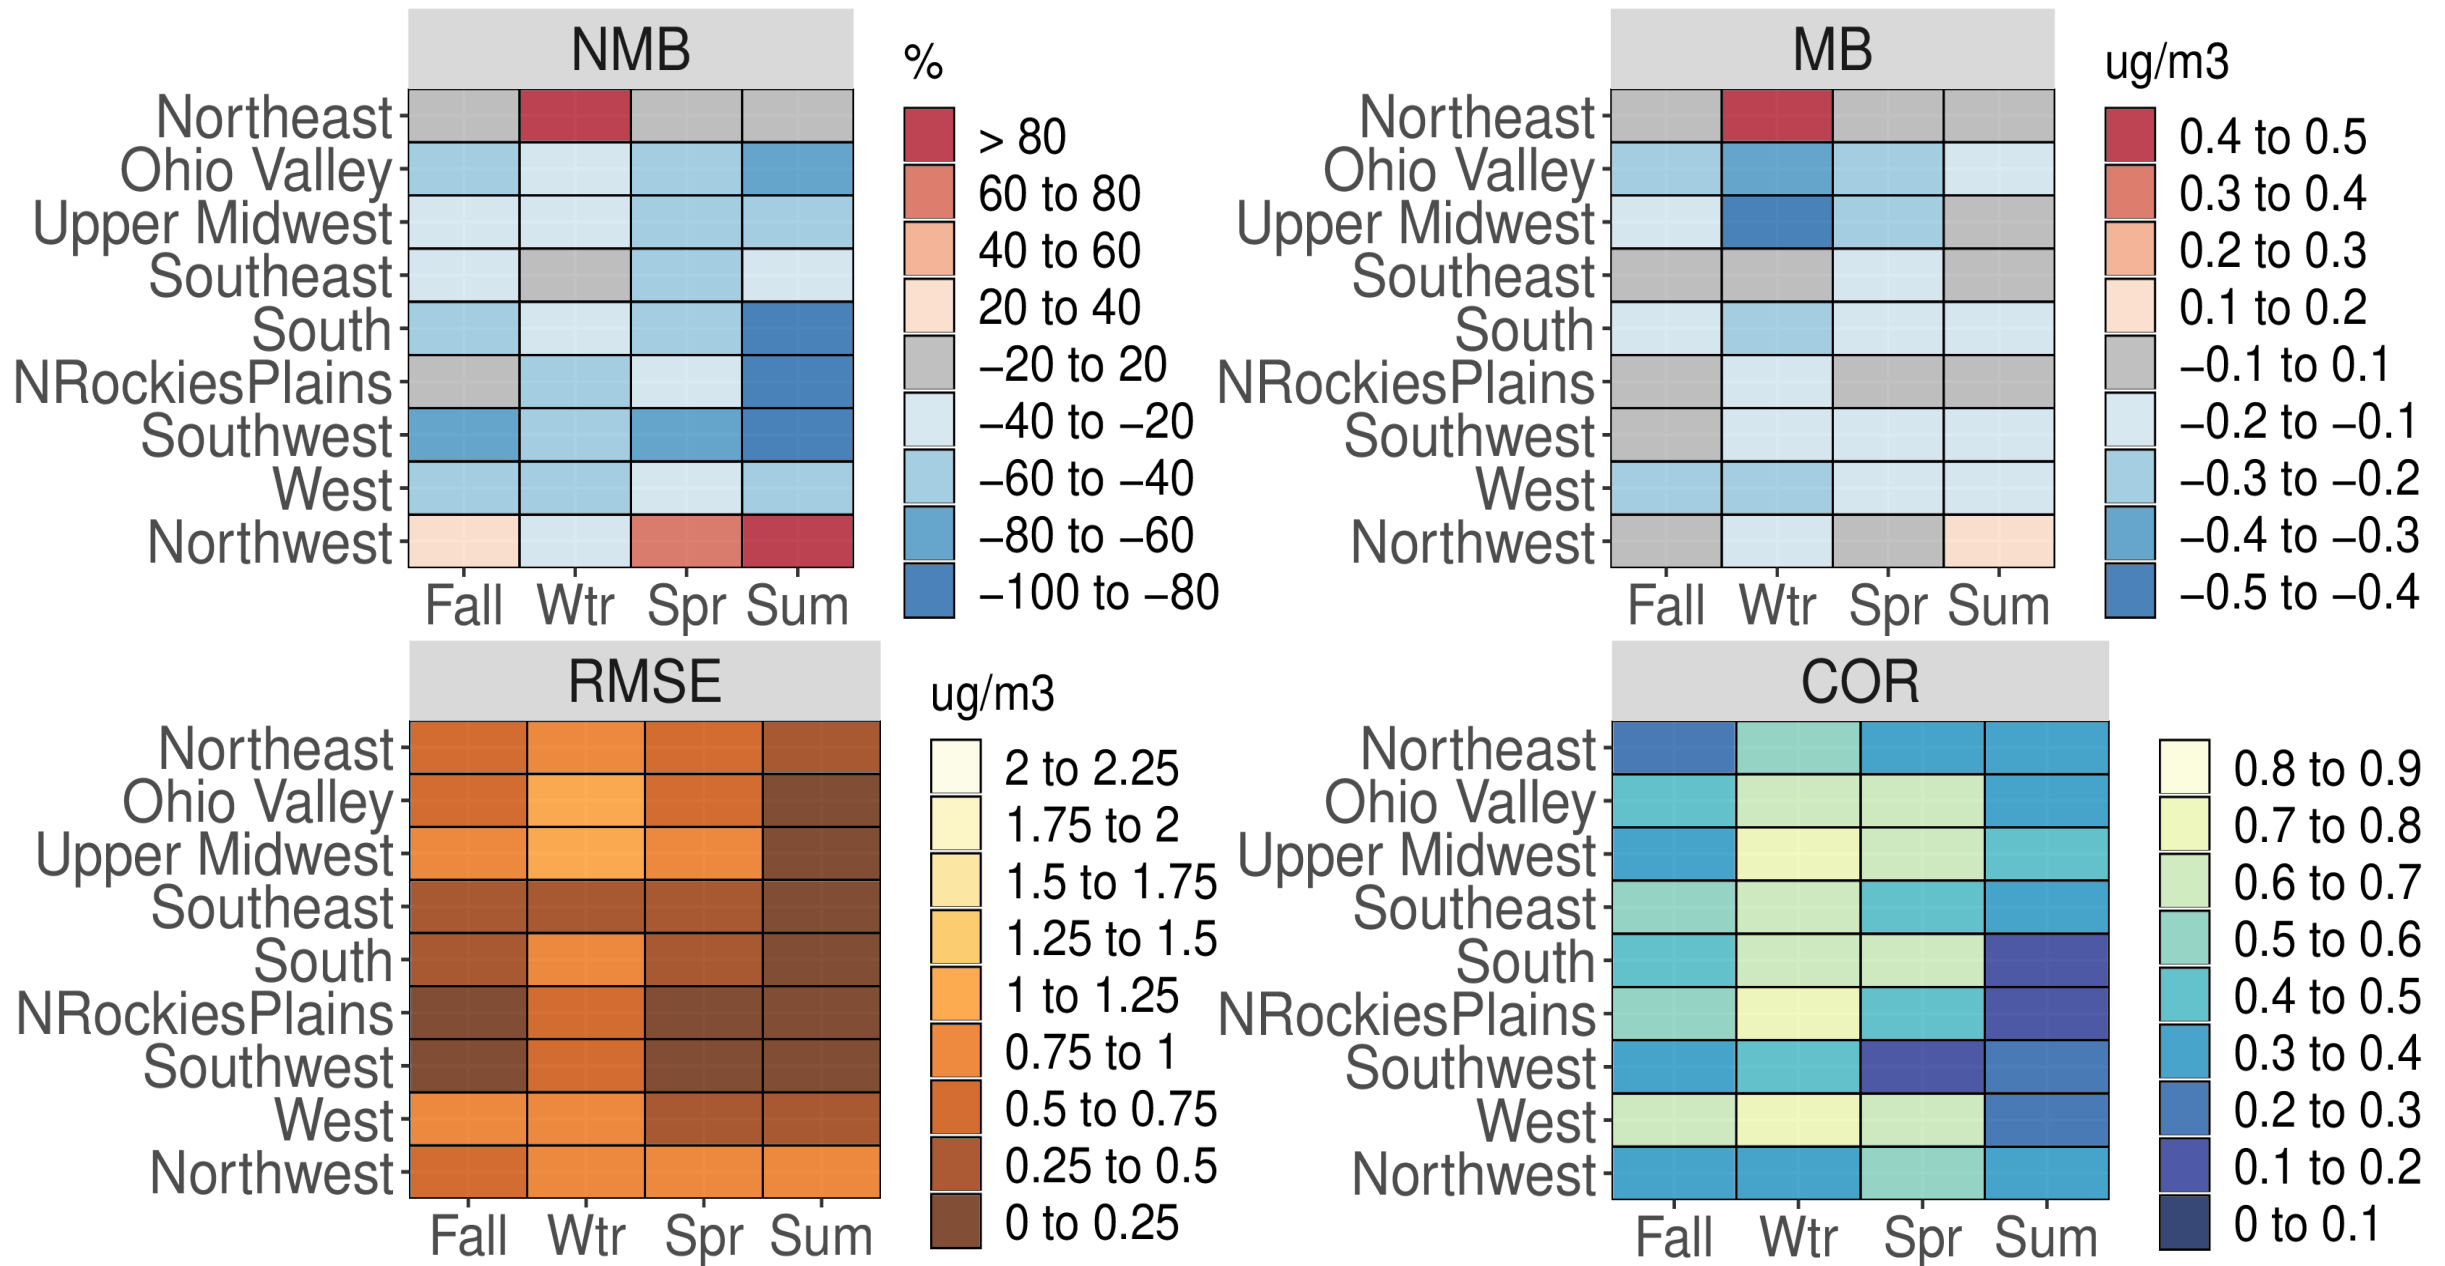

Figure S31. Categorical NMB (%), MB ( $\mu\text{g m}^{-3}$ ), RMSE ( $\mu\text{g m}^{-3}$ ), and Pearson correlation values for  $\text{NO}_3^-$  for all IMPROVE sites based on season and NOAA climate region for the CMAQ521 simulation.

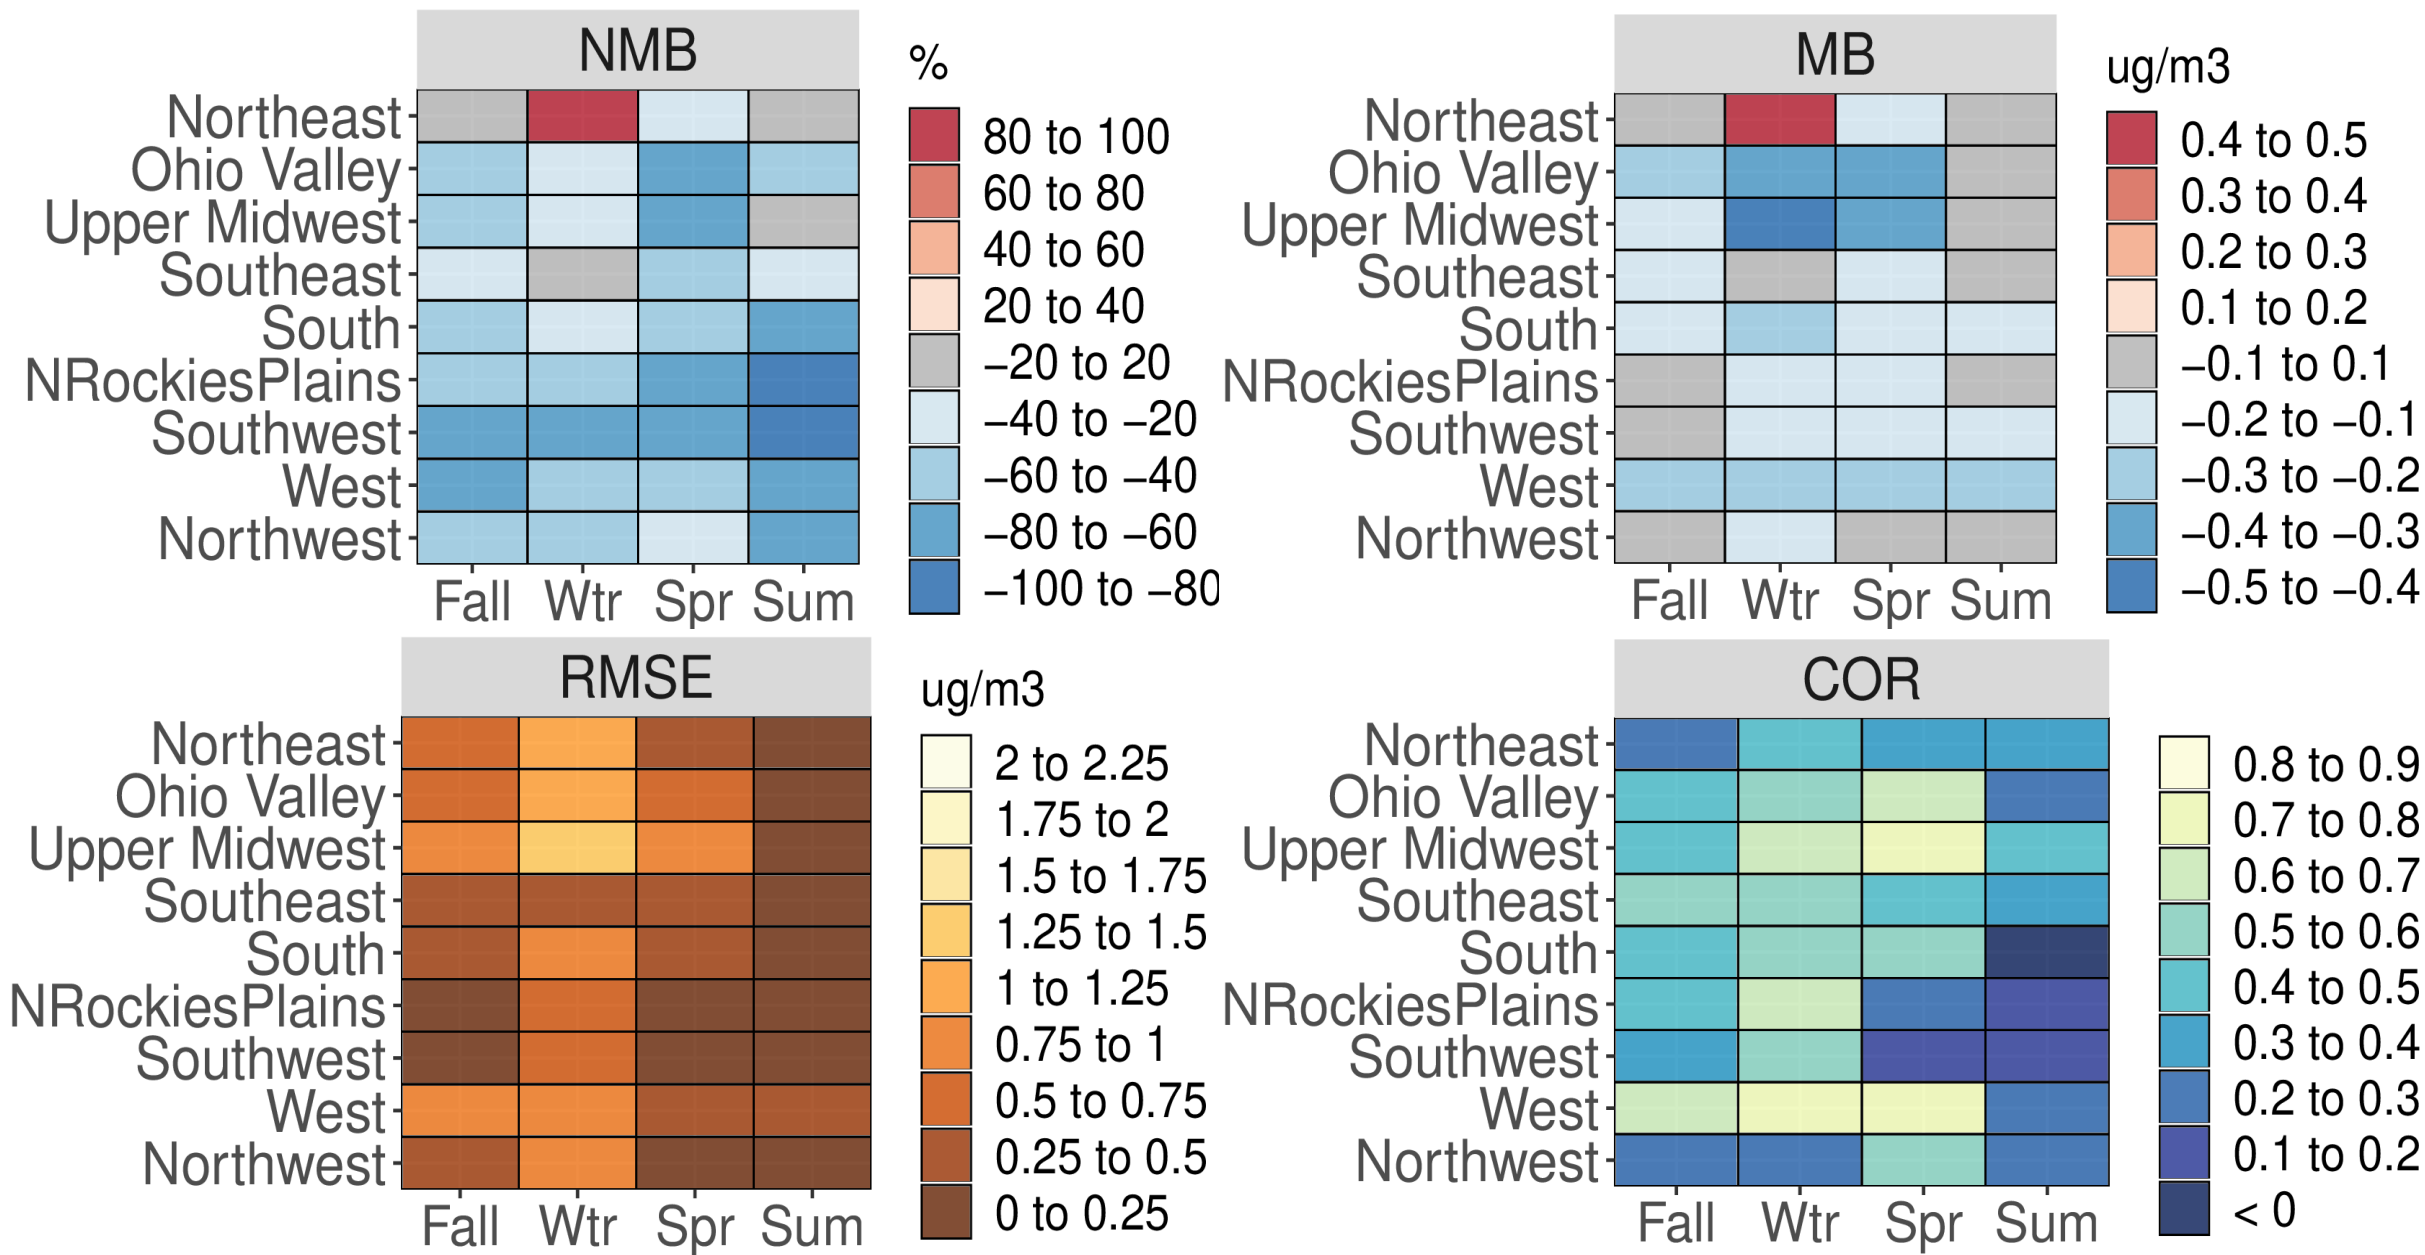

Figure S32. Categorical NMB (%), MB ( $\mu\text{g}/\text{m}^3$ ), RMSE ( $\mu\text{g}/\text{m}^3$ ), and Pearson correlation values for  $\text{NO}_3^-$  for all IMPROVE sites based on season and NOAA climate region for the CMAQ531\_WRF411\_M3Dry\_BiDi simulation.

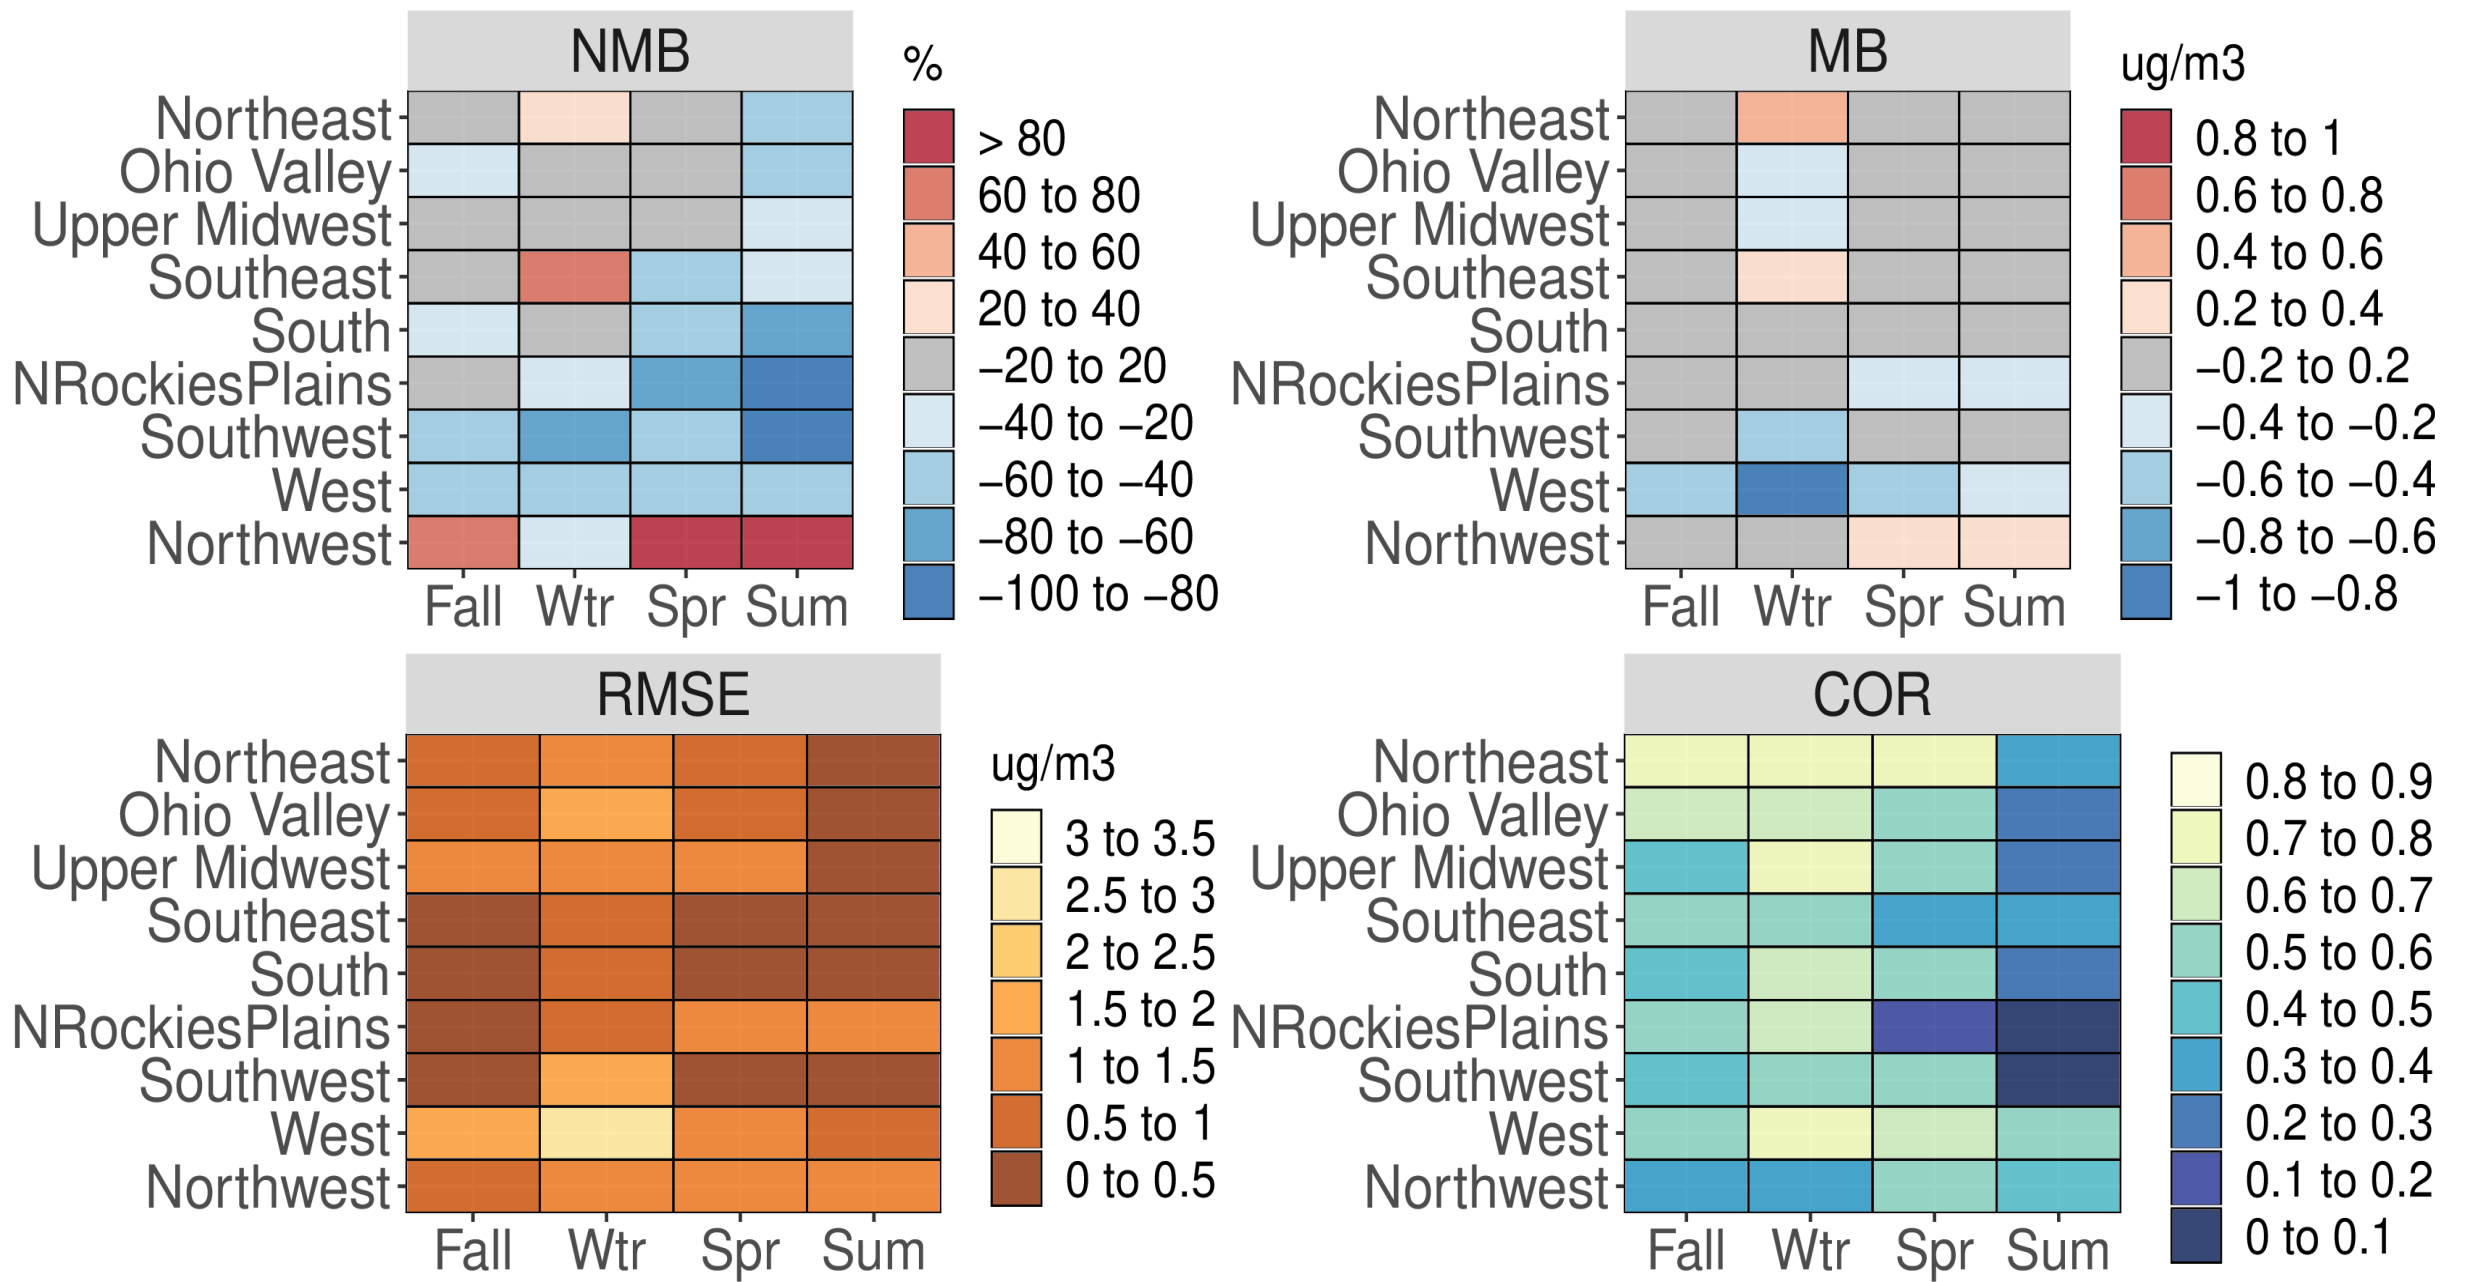

Figure S33. Categorical NMB (%), MB ( $\mu\text{g m}^{-3}$ ), RMSE ( $\mu\text{g m}^{-3}$ ), and Pearson correlation values for NO<sub>3</sub><sup>-</sup> for all AQS sites based on season and NOAA climate region for the CMAQ521 simulation.

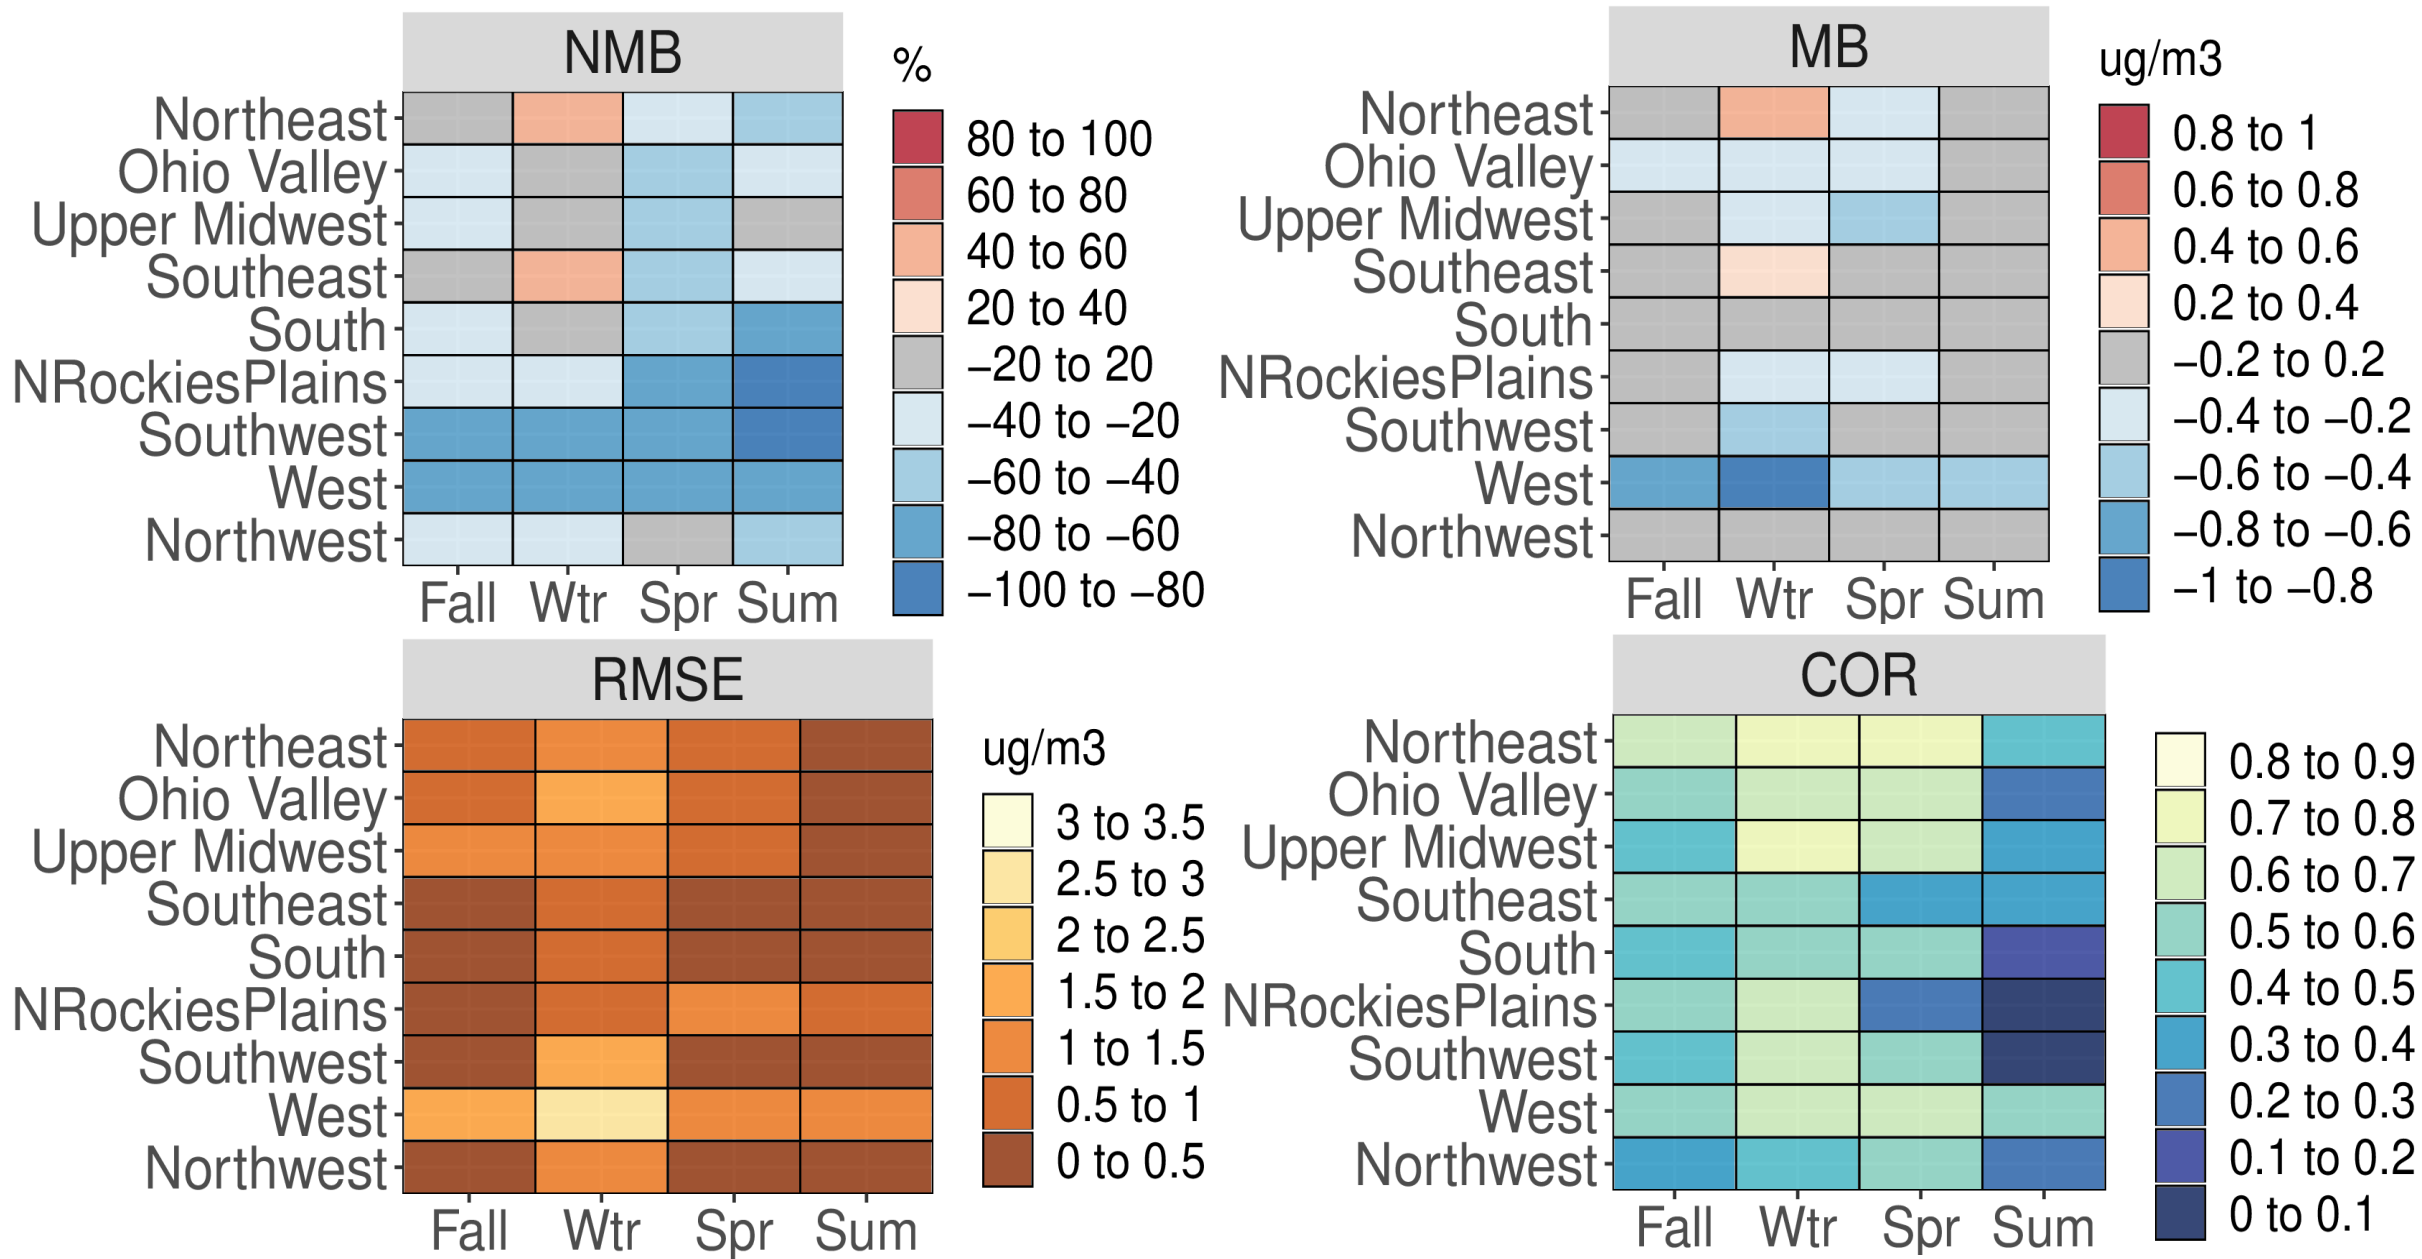

Figure S34. Categorical NMB (%), MB ( $\mu\text{g}/\text{m}^3$ ), RMSE ( $\mu\text{g}/\text{m}^3$ ), and Pearson correlation values for  $\text{NO}_3^-$  for all AQS sites based on season and NOAA climate region for the CMAQ531\_WRF411\_M3Dry\_BiDi simulation.

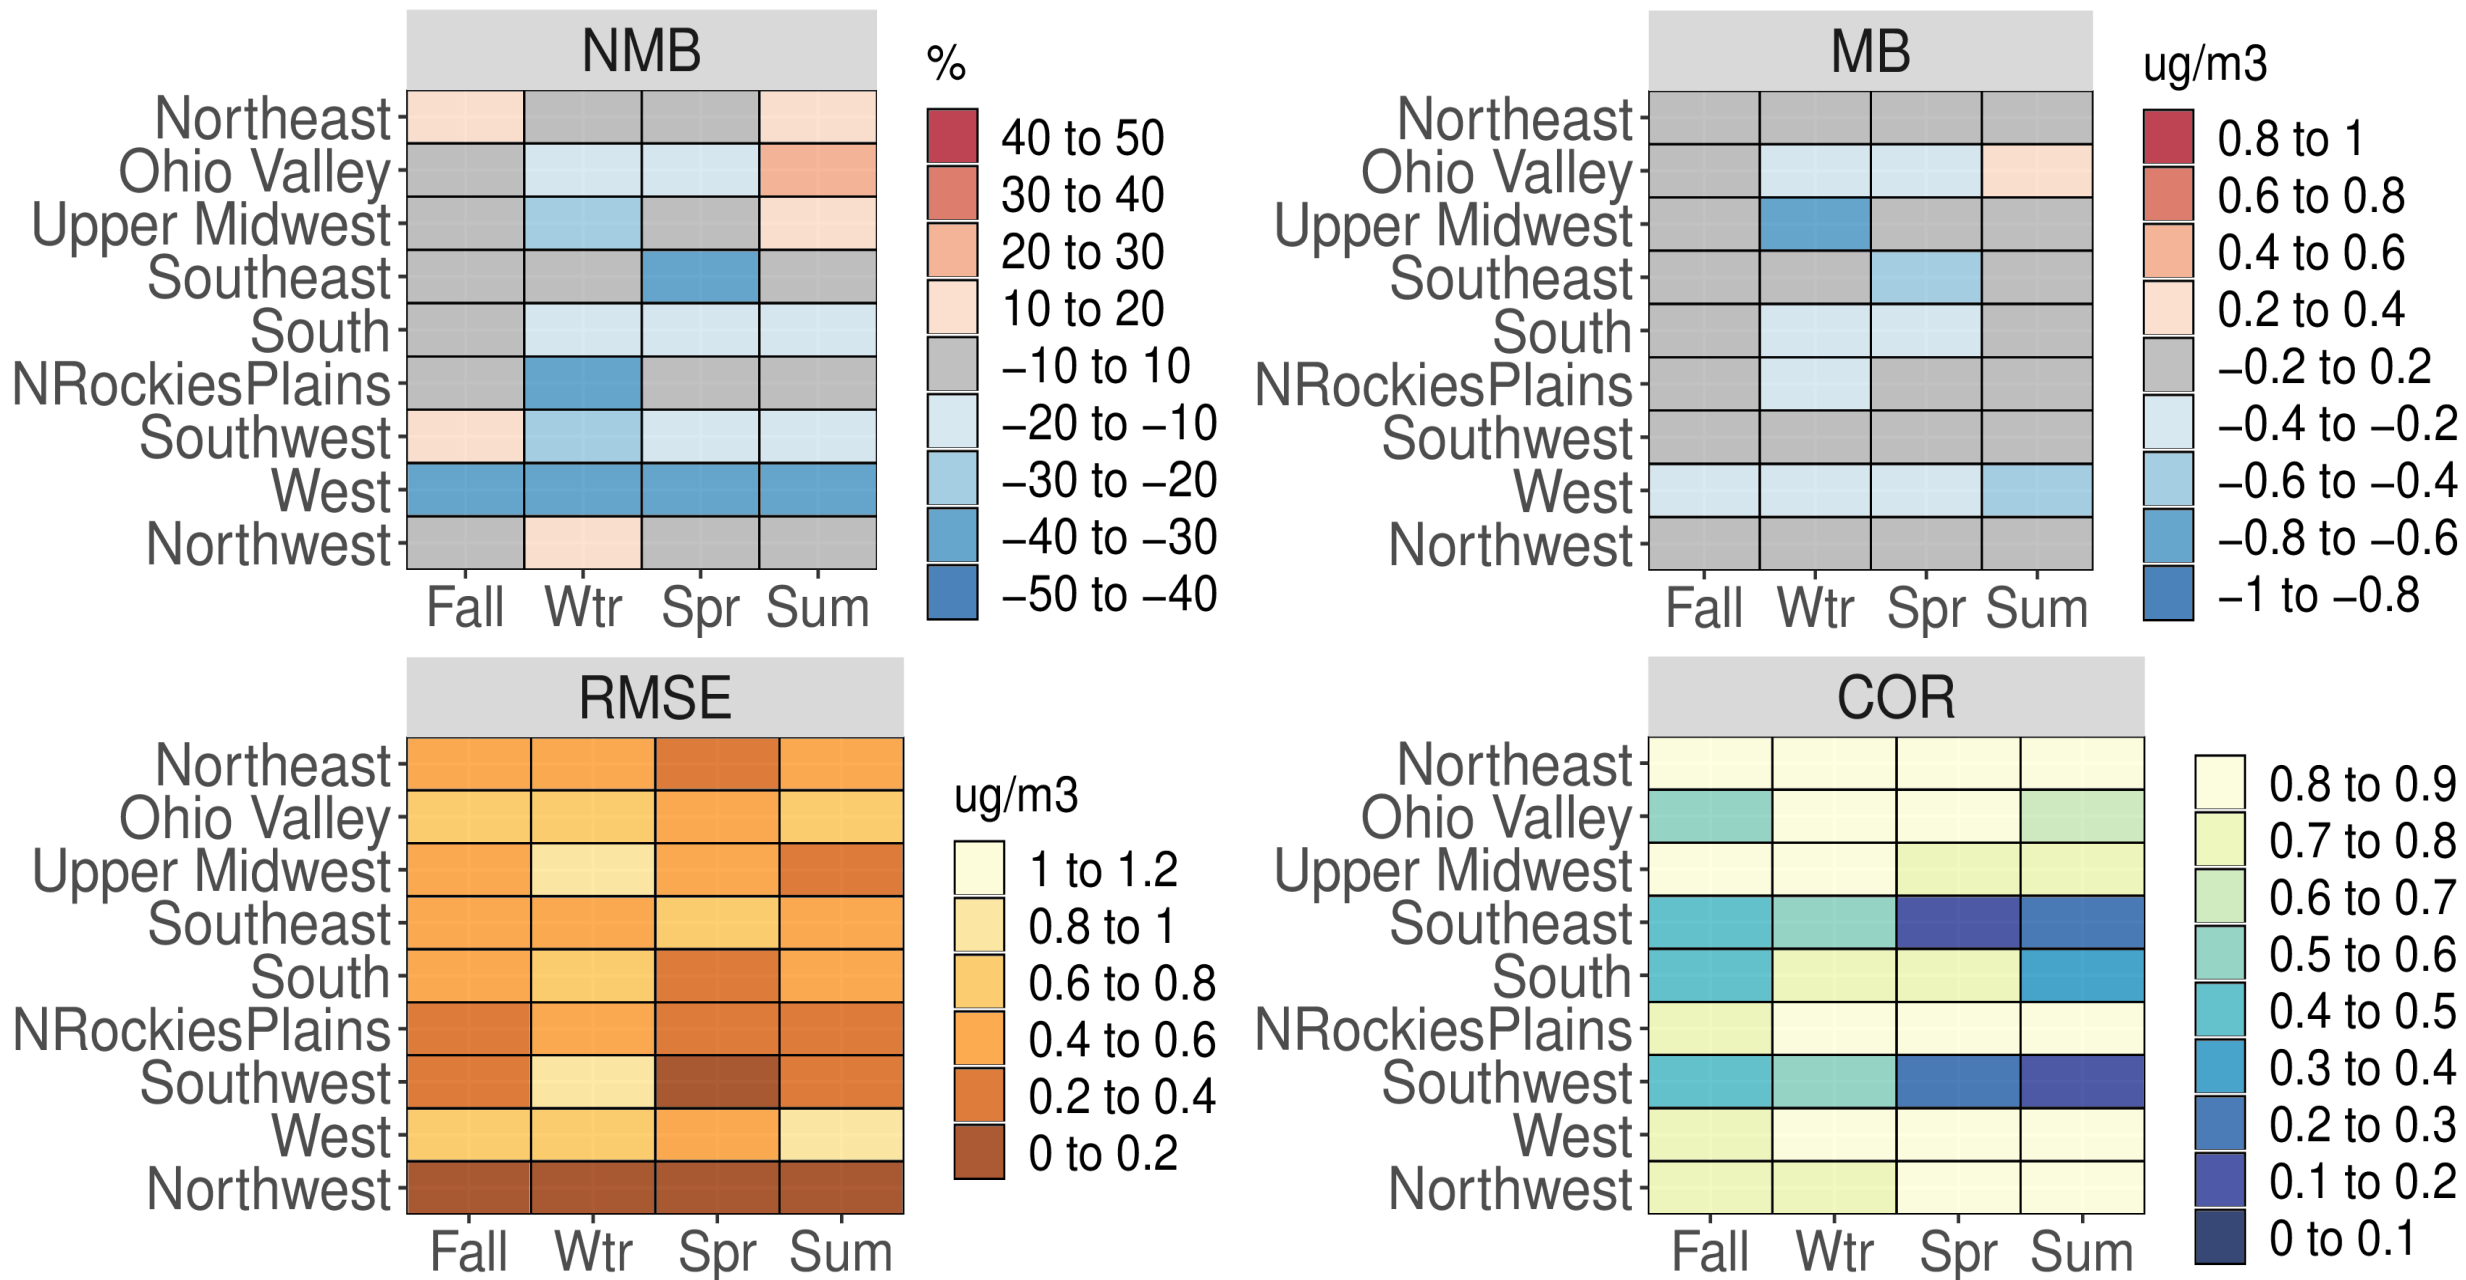

Figure S35. Categorical NMB (%), MB ( $\mu\text{g m}^{-3}$ ), RMSE ( $\mu\text{g m}^{-3}$ ), and Pearson correlation values for TNO<sub>3</sub><sup>-</sup> for all CASTNet sites based on season and NOAA climate region for the CMAQ521 simulation.



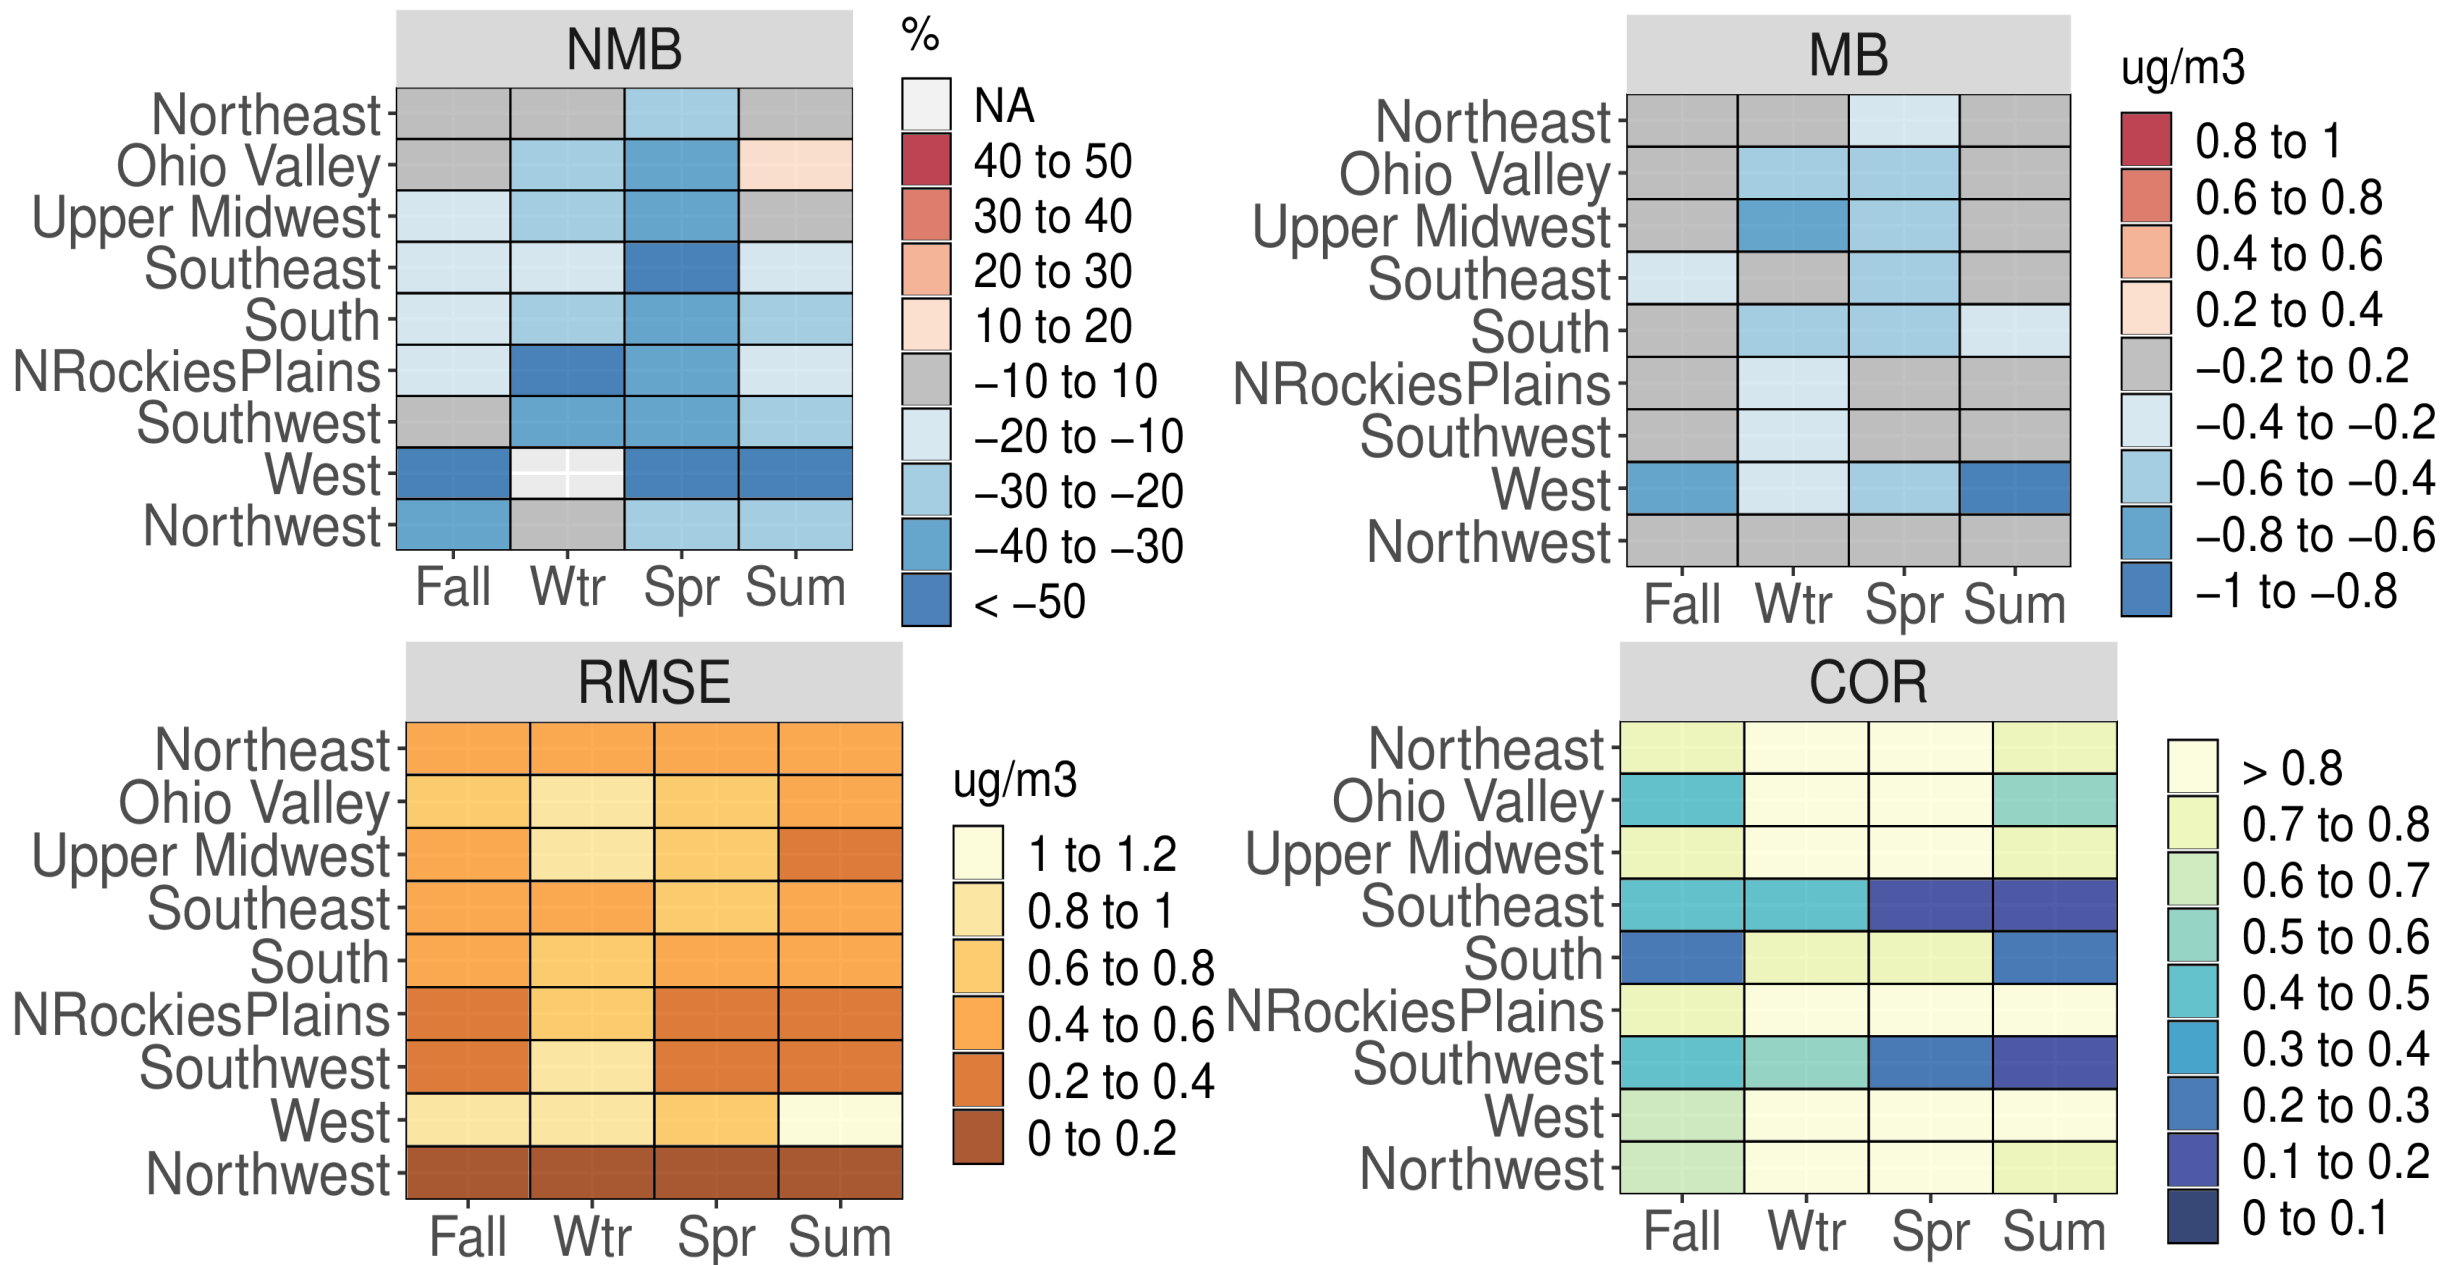

Figure S36. Categorical NMB (%), MB ( $\mu\text{g}/\text{m}^3$ ), RMSE ( $\mu\text{g}/\text{m}^3$ ), and Pearson correlation values for  $\text{TNO}_3^-$  for all CASTNet sites based on season and NOAA climate region for the CMAQ531\_WRF411\_M3Dry\_BiDi simulation.

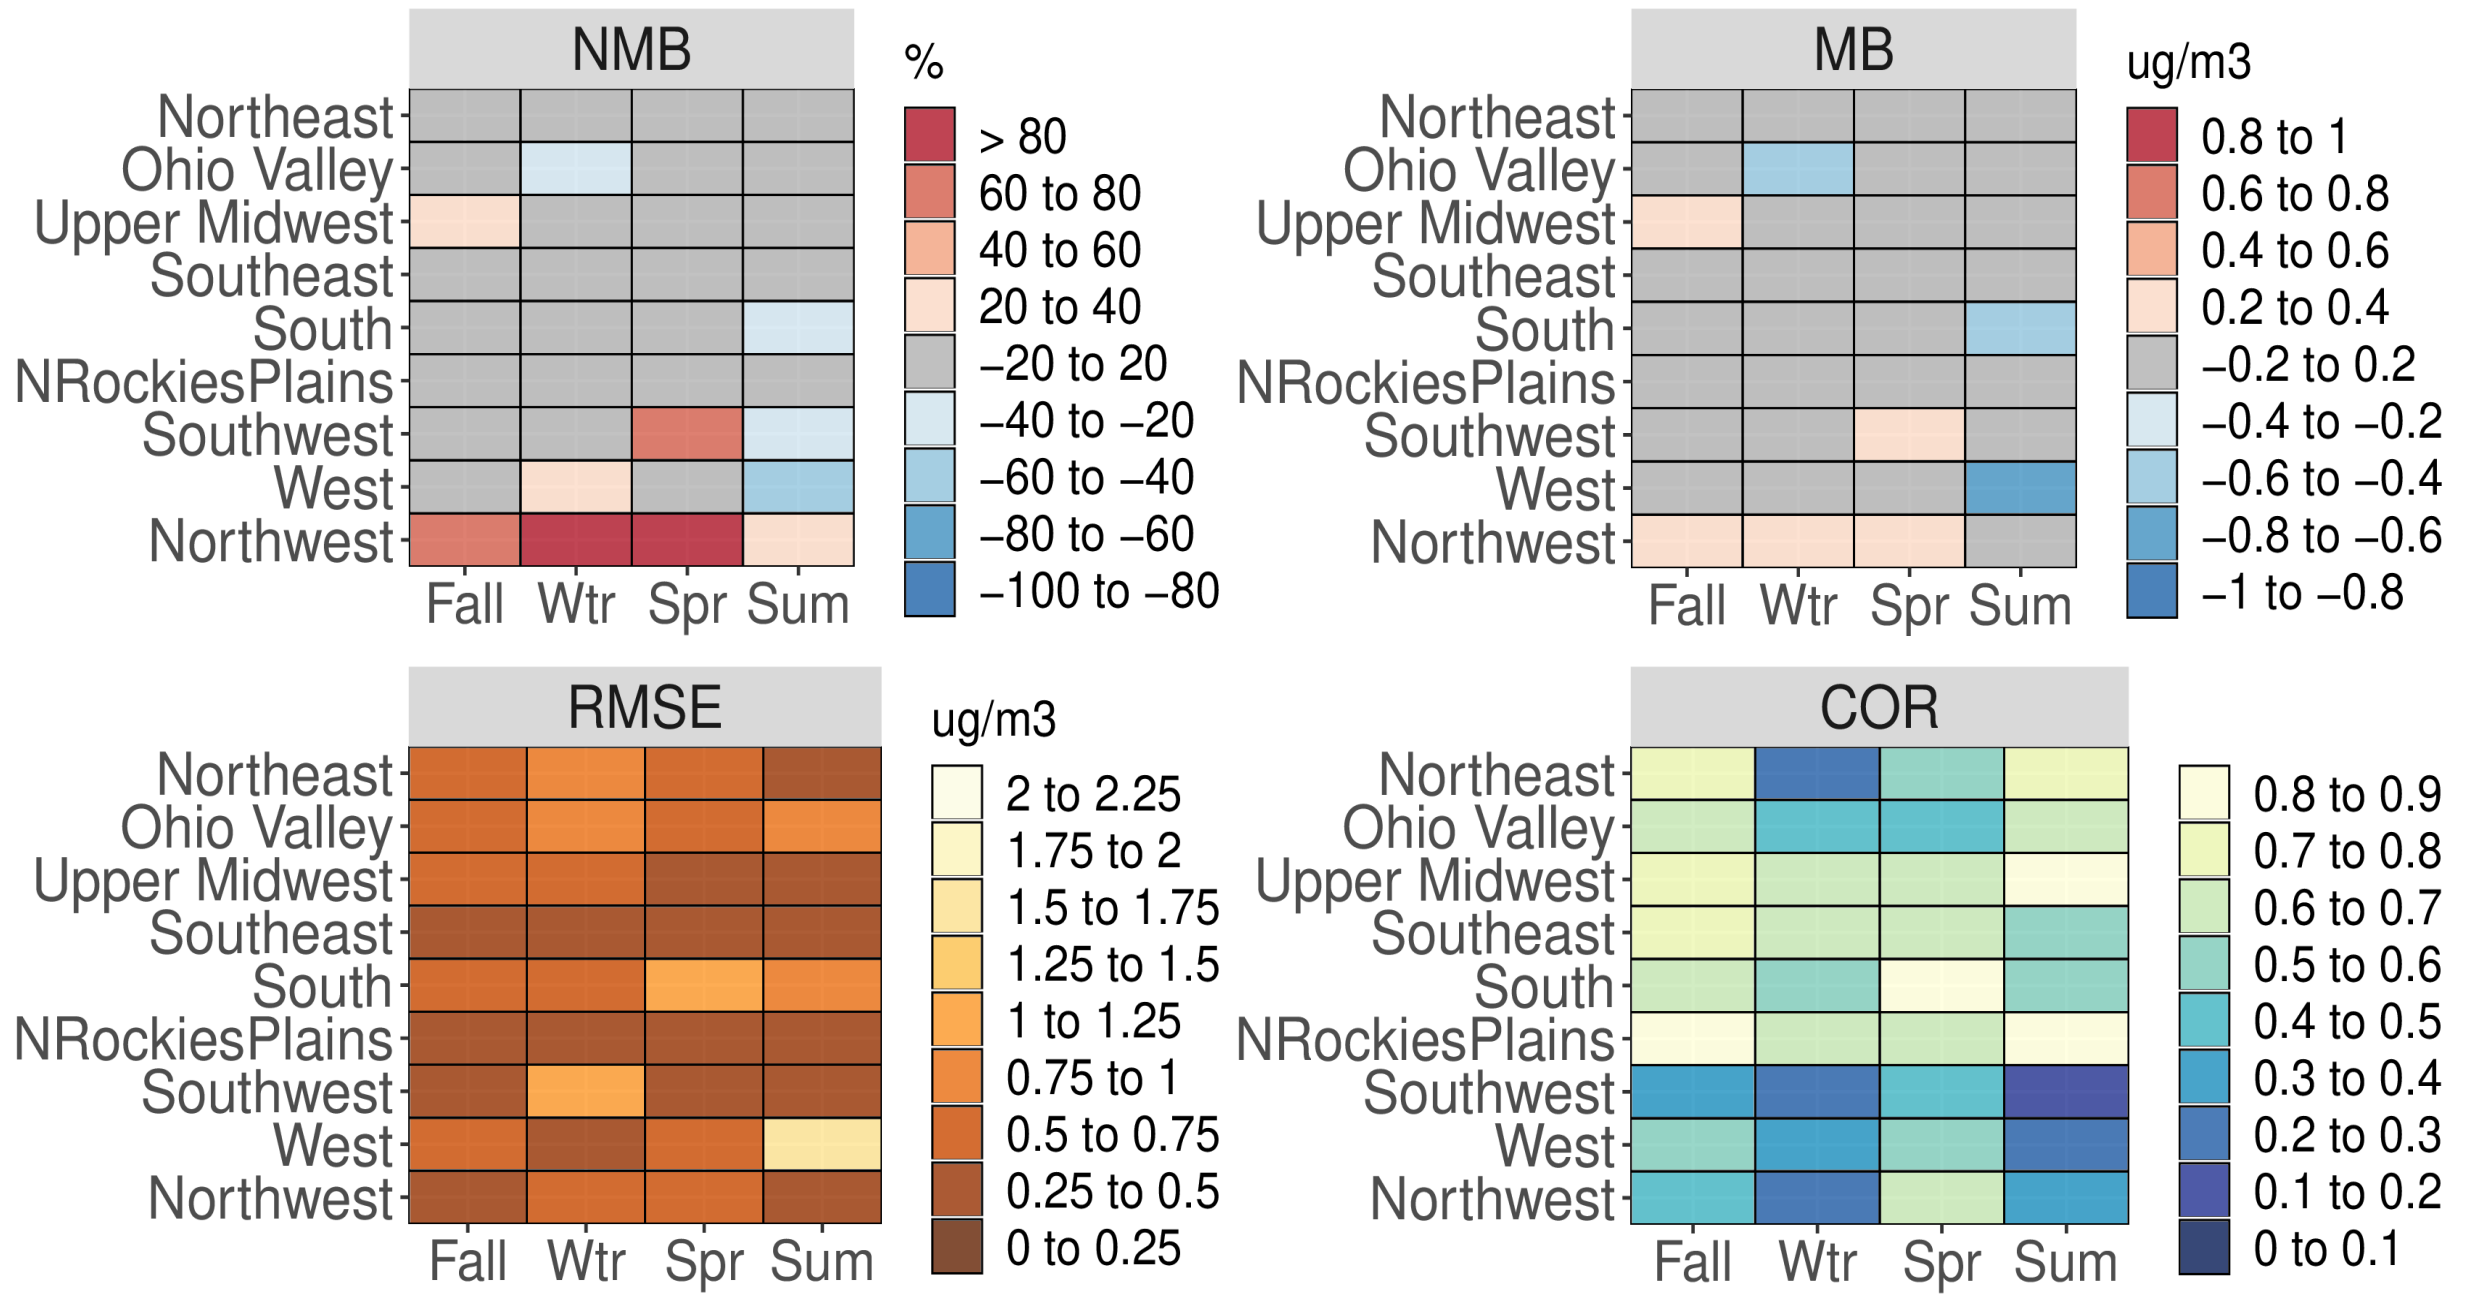

Figure S37. Categorical NMB (%), MB ( $\mu\text{g m}^{-3}$ ), RMSE ( $\mu\text{g m}^{-3}$ ), and Pearson correlation values for  $\text{SO}_4^{2-}$  for all CSN sites based on season and NOAA climate region for the CMAQ521 simulation.

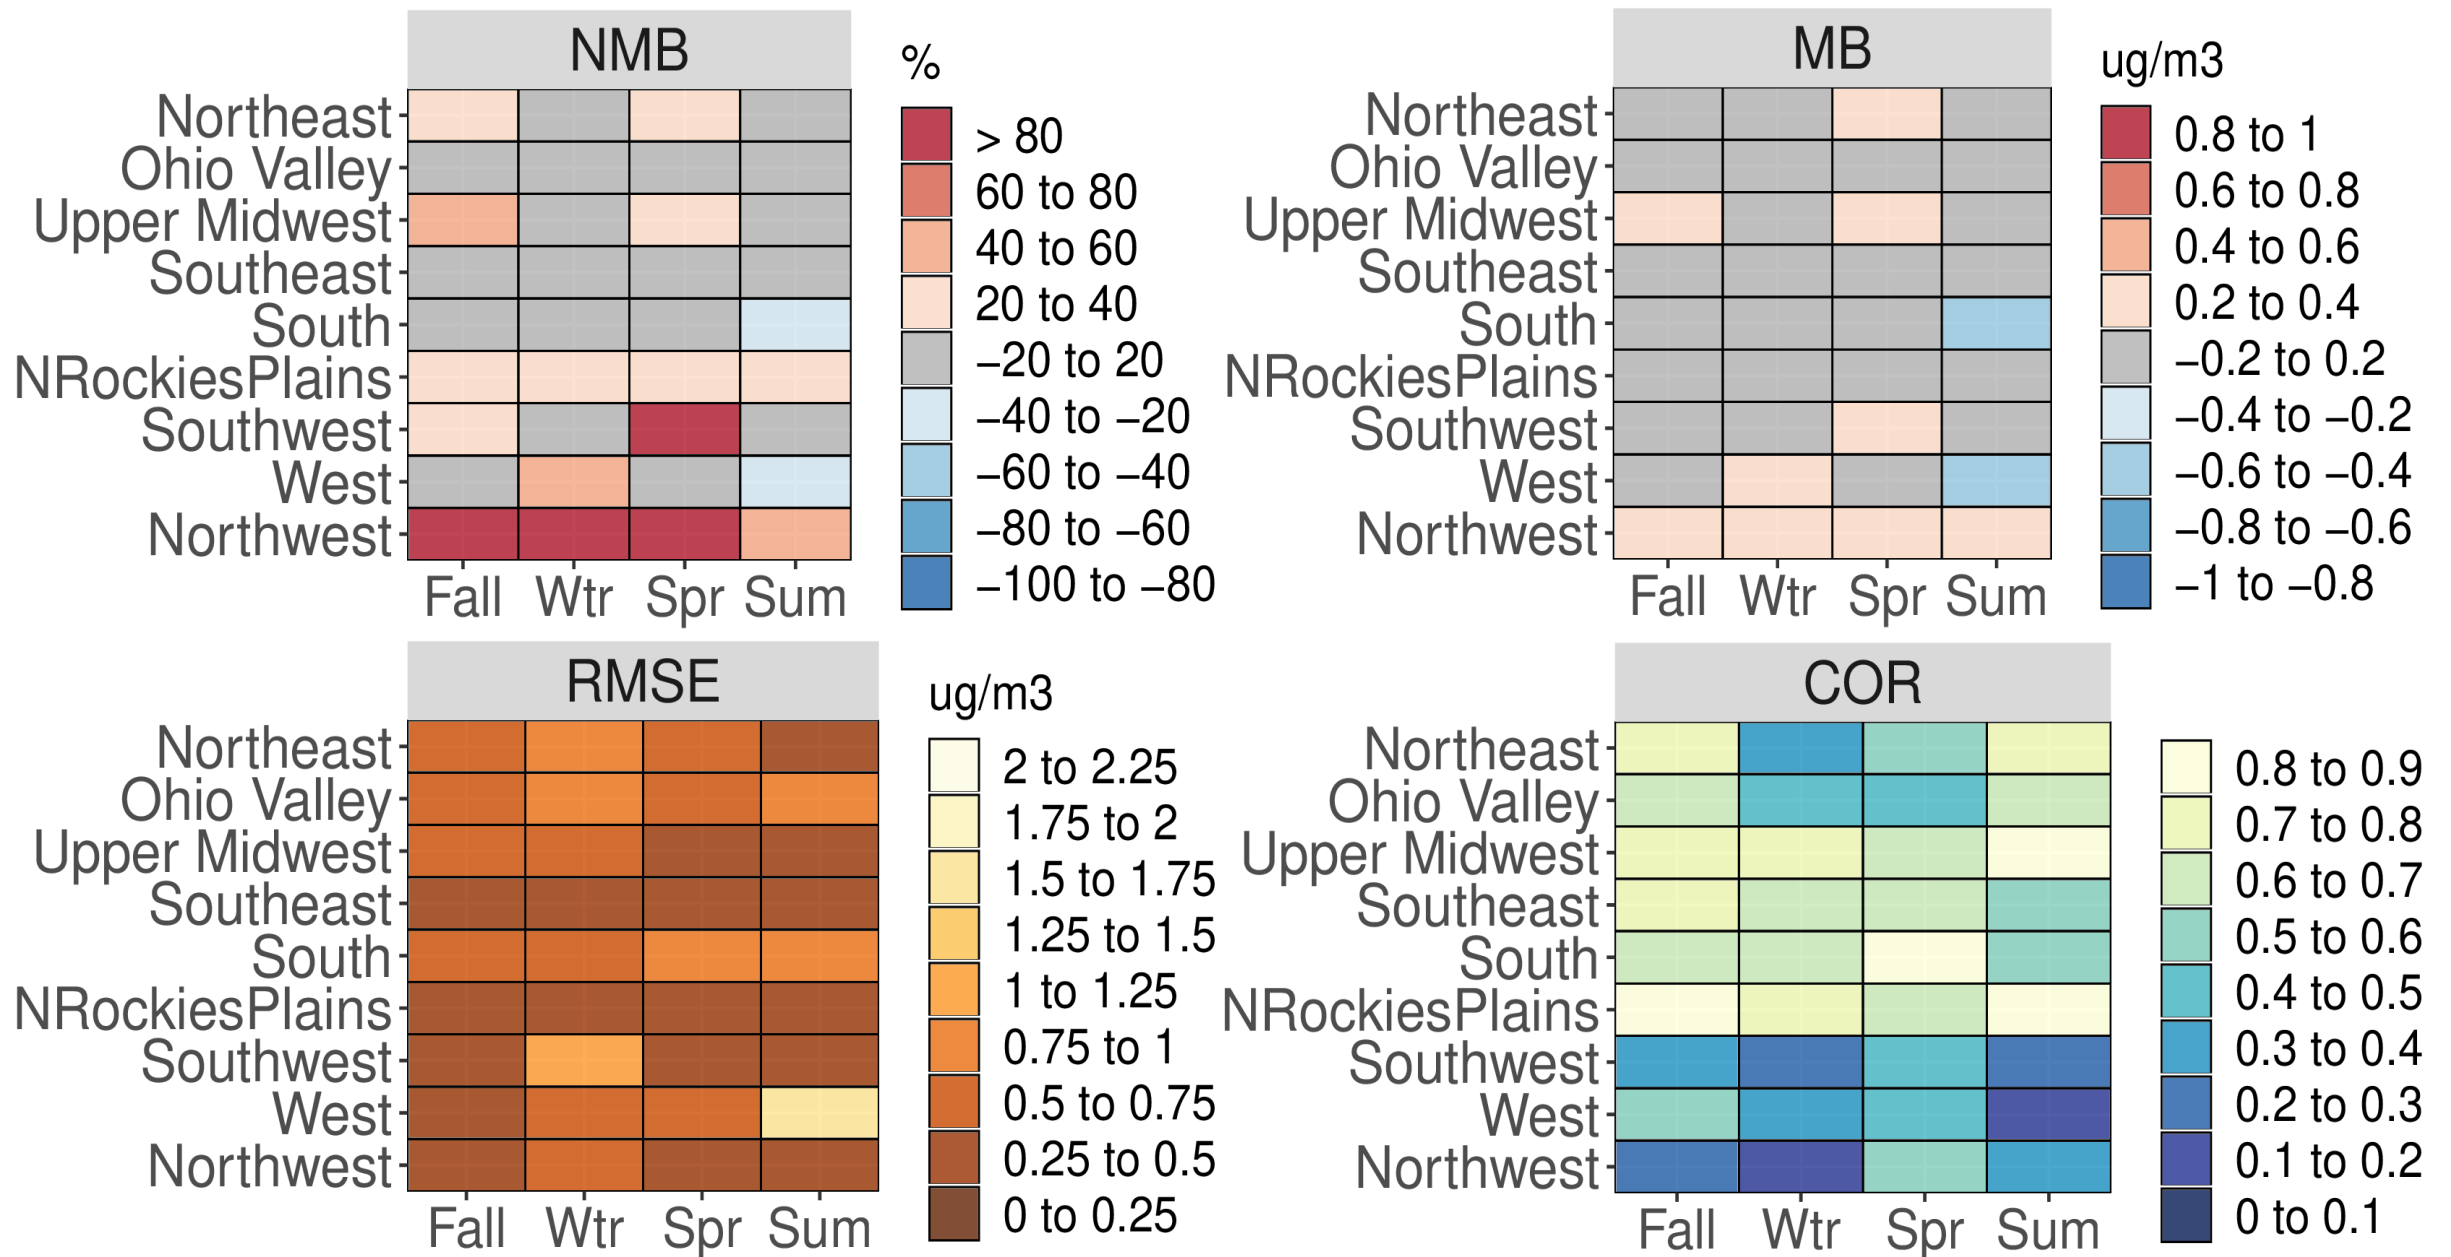

Figure S38. Categorical NMB (%), MB ( $\mu\text{g m}^{-3}$ ), RMSE ( $\mu\text{g m}^{-3}$ ), and Pearson correlation values for SO<sub>4</sub><sup>2-</sup> for all CSN sites based on season and NOAA climate region for the CMAQ531\_WRF411\_M3Dry\_BiDi simulation.

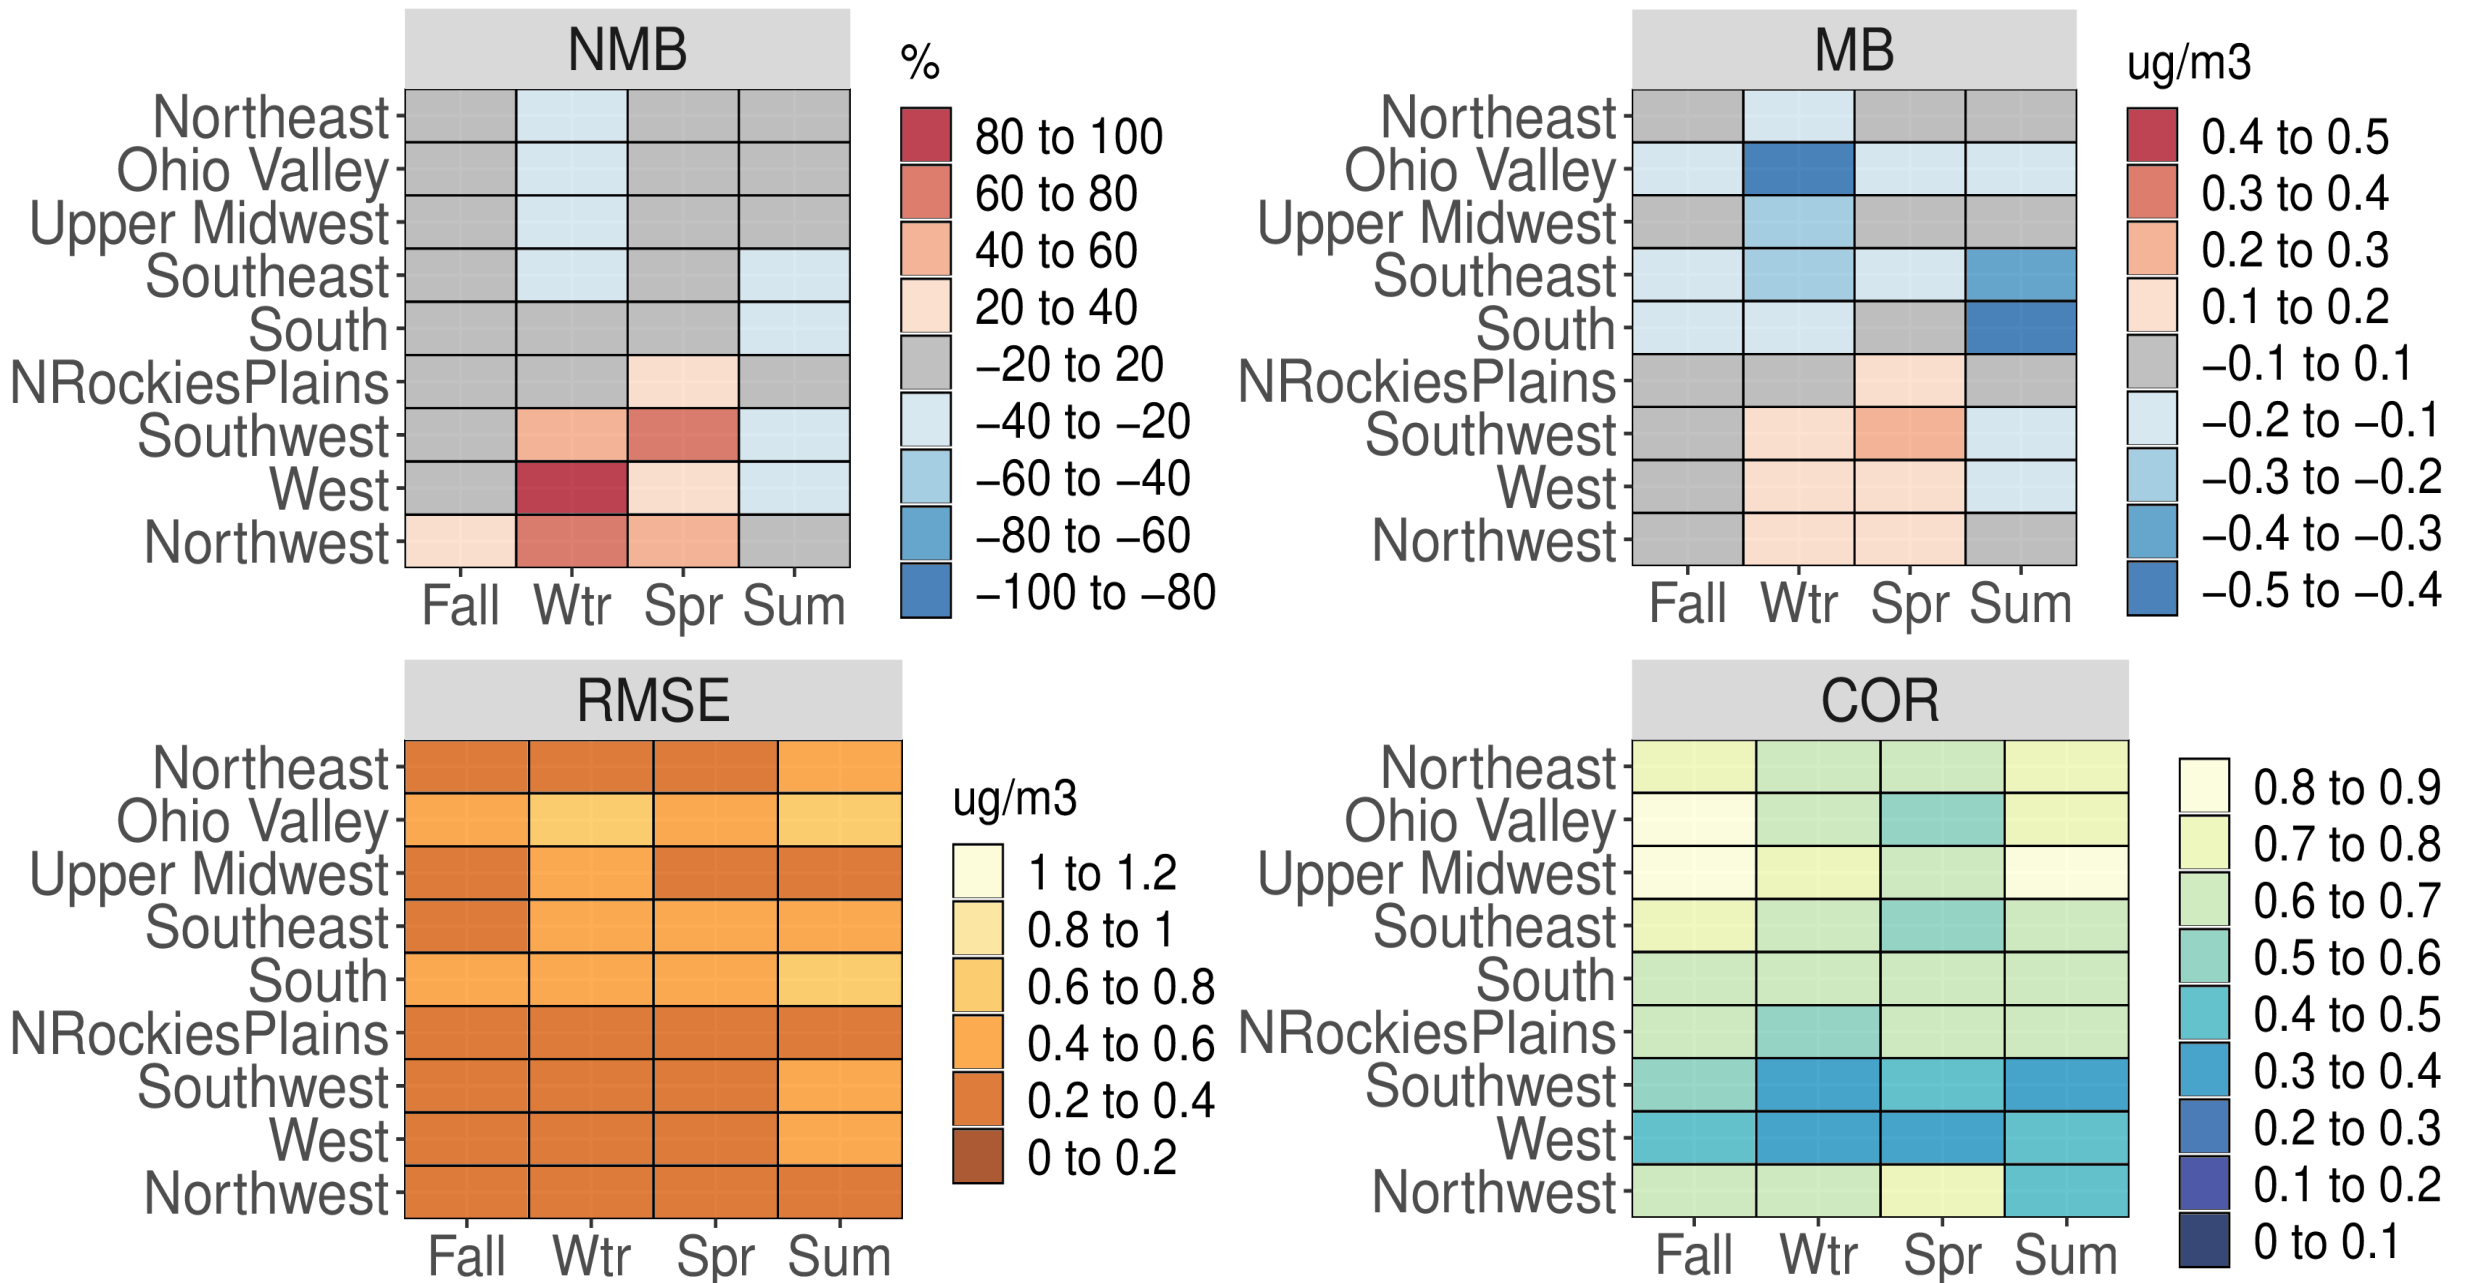

Figure S39. Categorical NMB (%), MB ( $\mu\text{g m}^{-3}$ ), RMSE ( $\mu\text{g m}^{-3}$ ), and Pearson correlation values for  $\text{SO}_4^{2-}$  for all IMPROVE sites based on season and NOAA climate region for the CMAQ521 simulation.

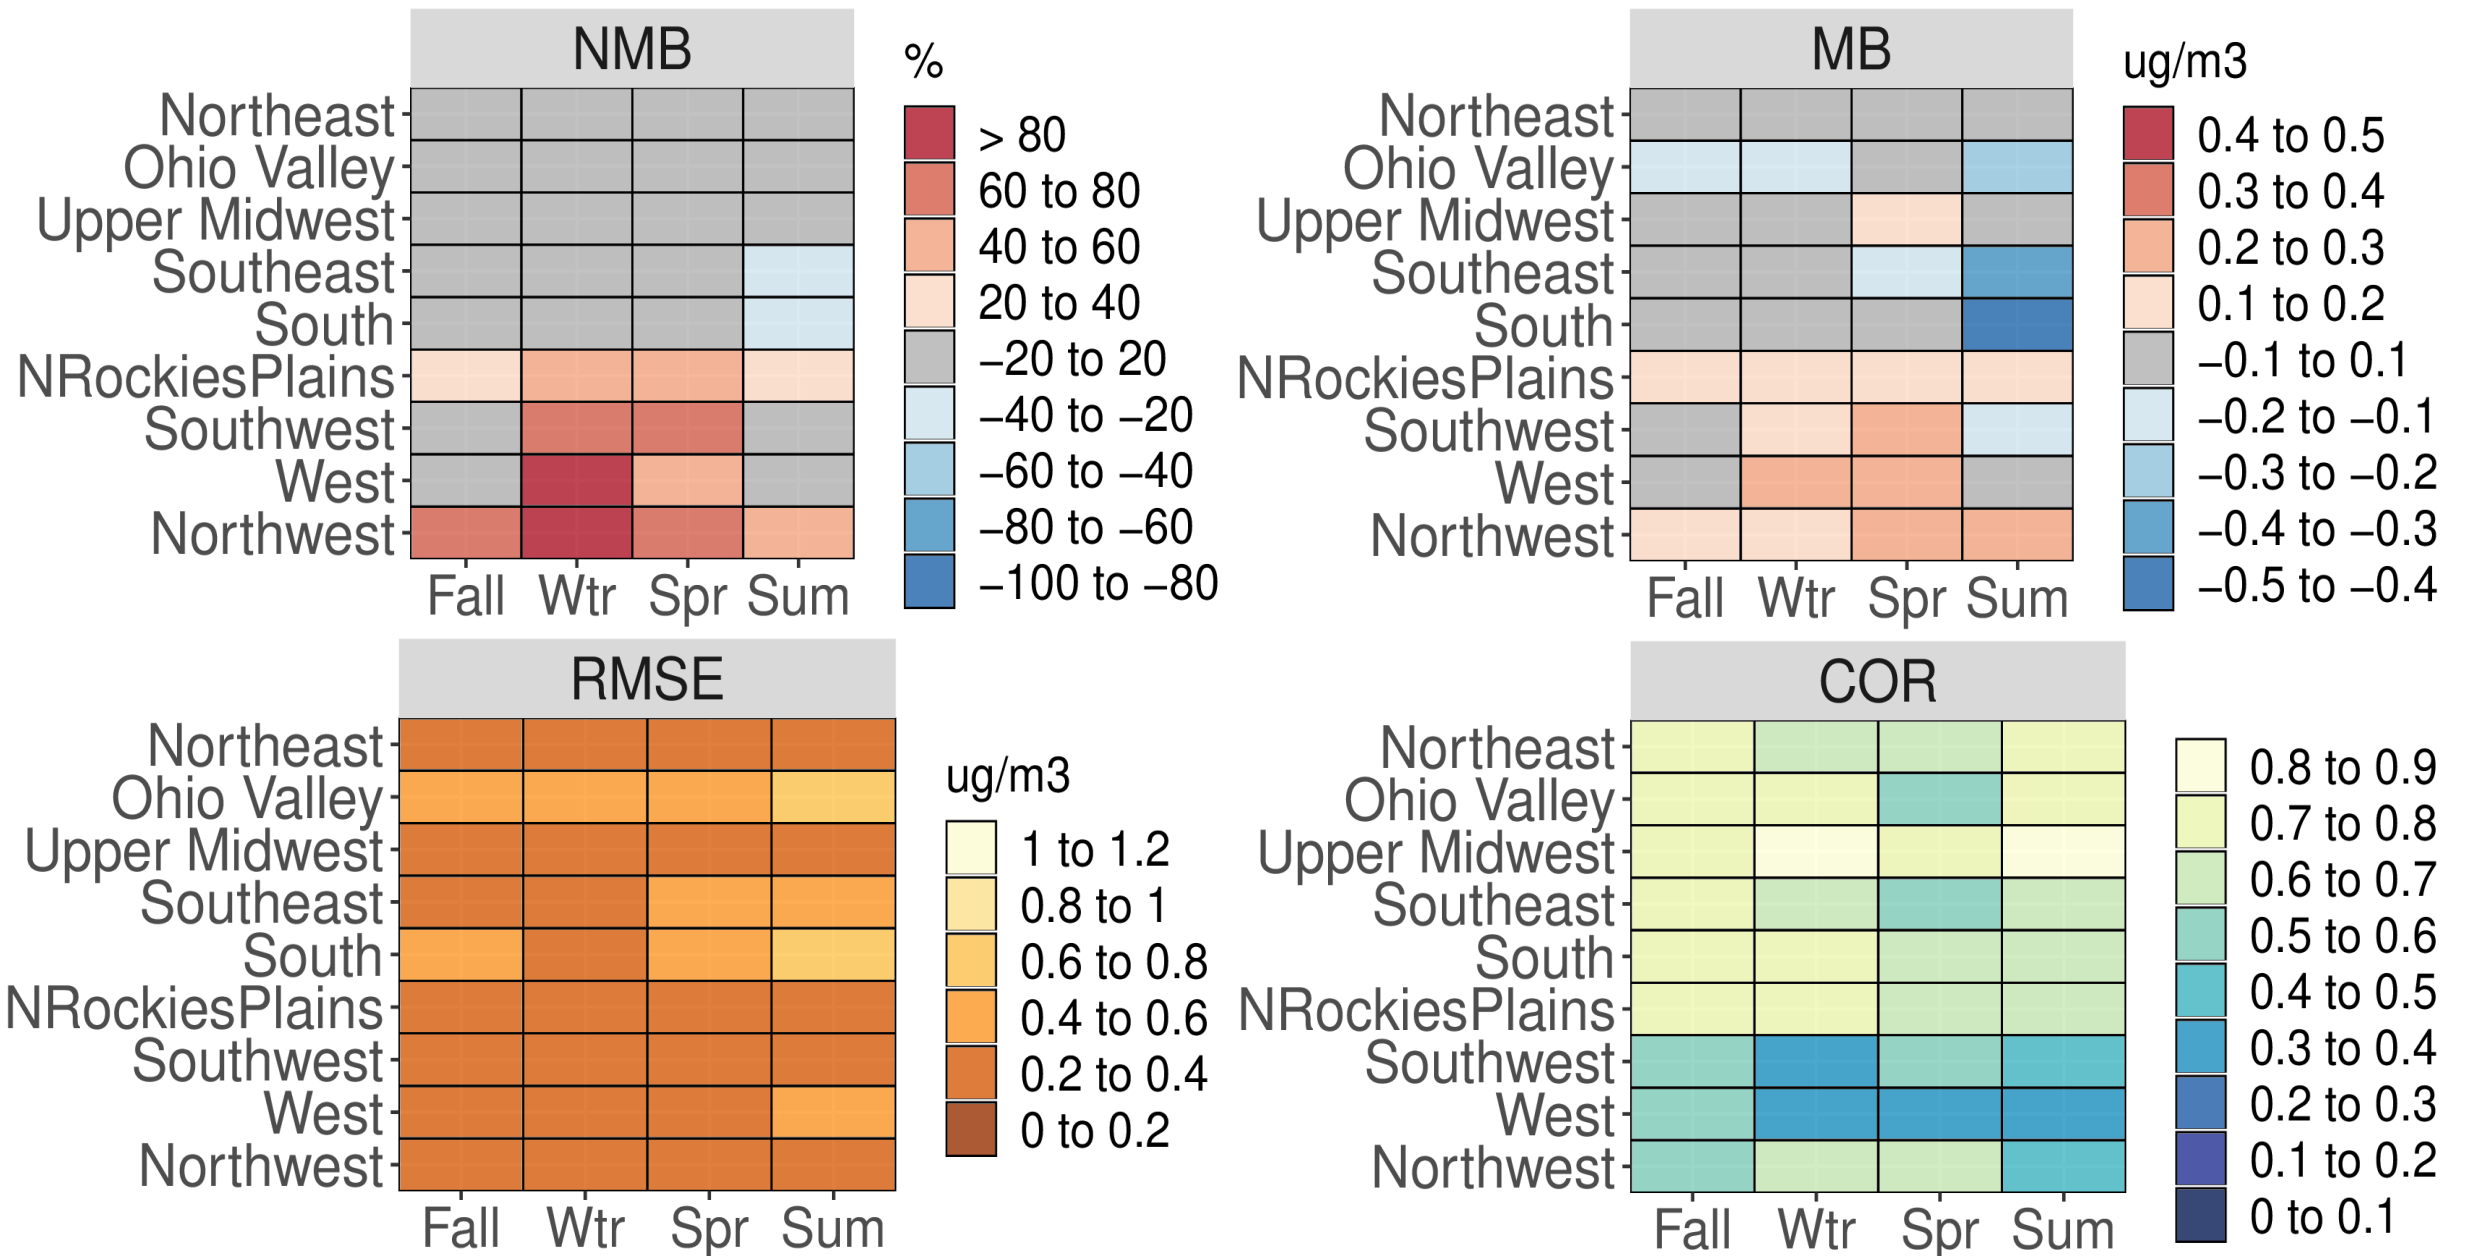

Figure S40. Categorical NMB (%), MB ( $\mu\text{g m}^{-3}$ ), RMSE ( $\mu\text{g m}^{-3}$ ), and Pearson correlation values for  $\text{SO}_4^{2-}$  for all IMPROVE sites based on season and NOAA climate region for the CMAQ531\_WRF411\_M3Dry\_BiDi simulation.



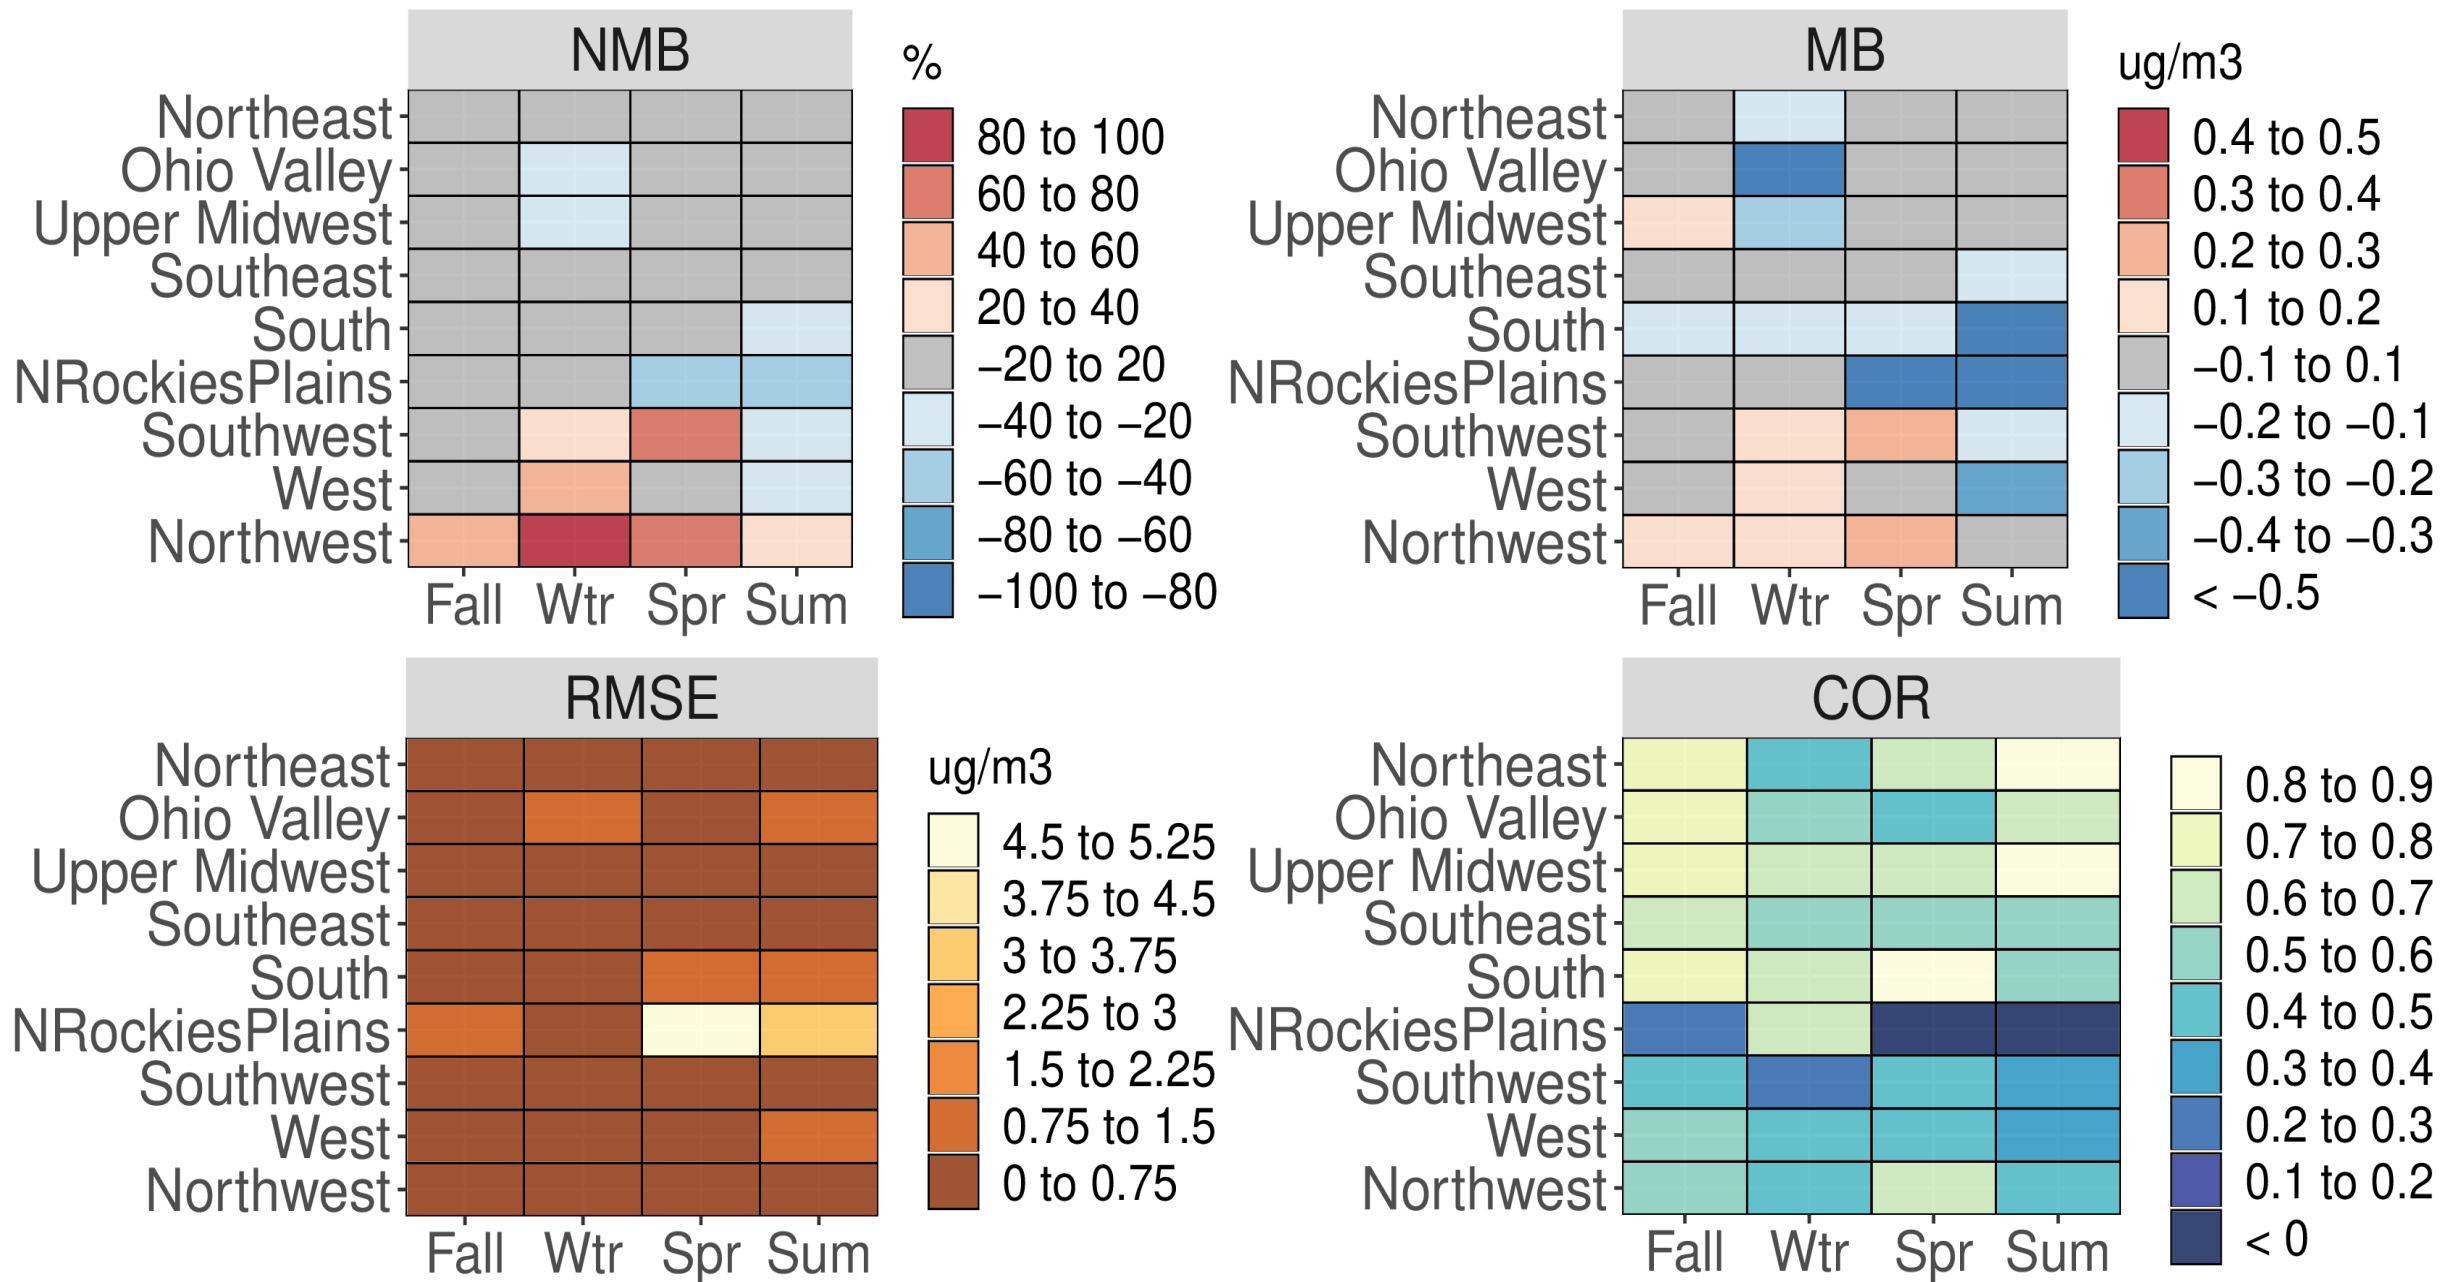

Figure S41. Categorical NMB (%), MB ( $\mu\text{g m}^{-3}$ ), RMSE ( $\mu\text{g m}^{-3}$ ), and Pearson correlation values for  $\text{SO}_4^{2-}$  for all AQS sites based on season and NOAA climate region for the CMAQ521 simulation.

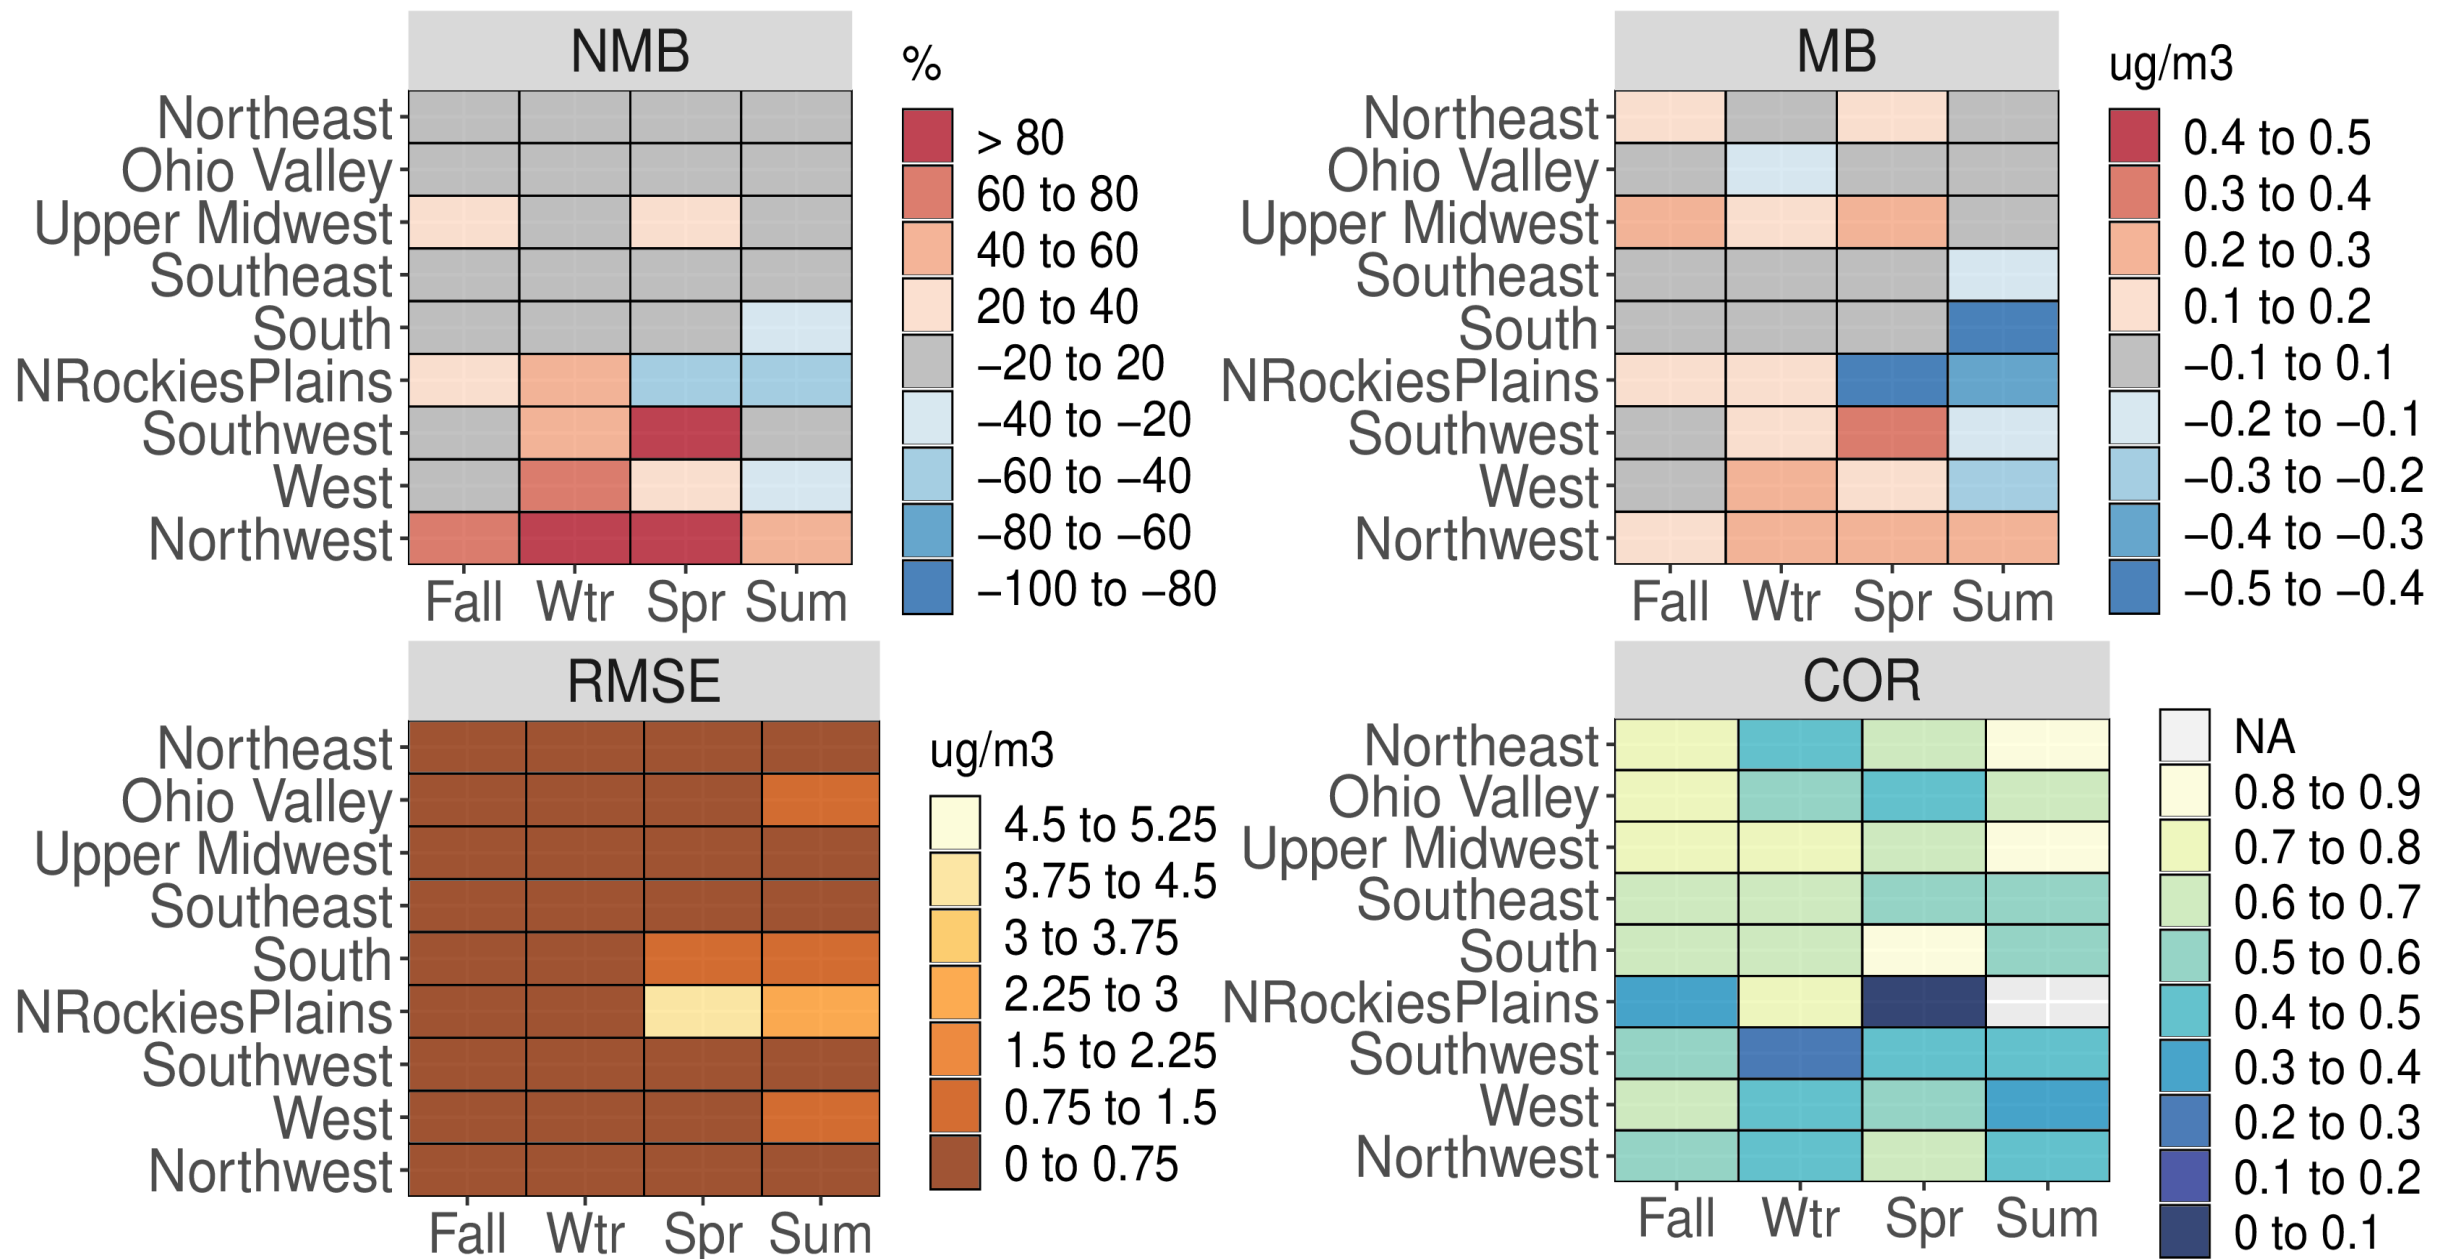

Figure S42. Categorical NMB (%), MB ( $\mu\text{g m}^{-3}$ ), RMSE ( $\mu\text{g m}^{-3}$ ), and Pearson correlation values for  $\text{SO}_4^{2-}$  for all AQS sites based on season and NOAA climate region for the CMAQ531\_WRF411\_M3Dry\_BiDi simulation.

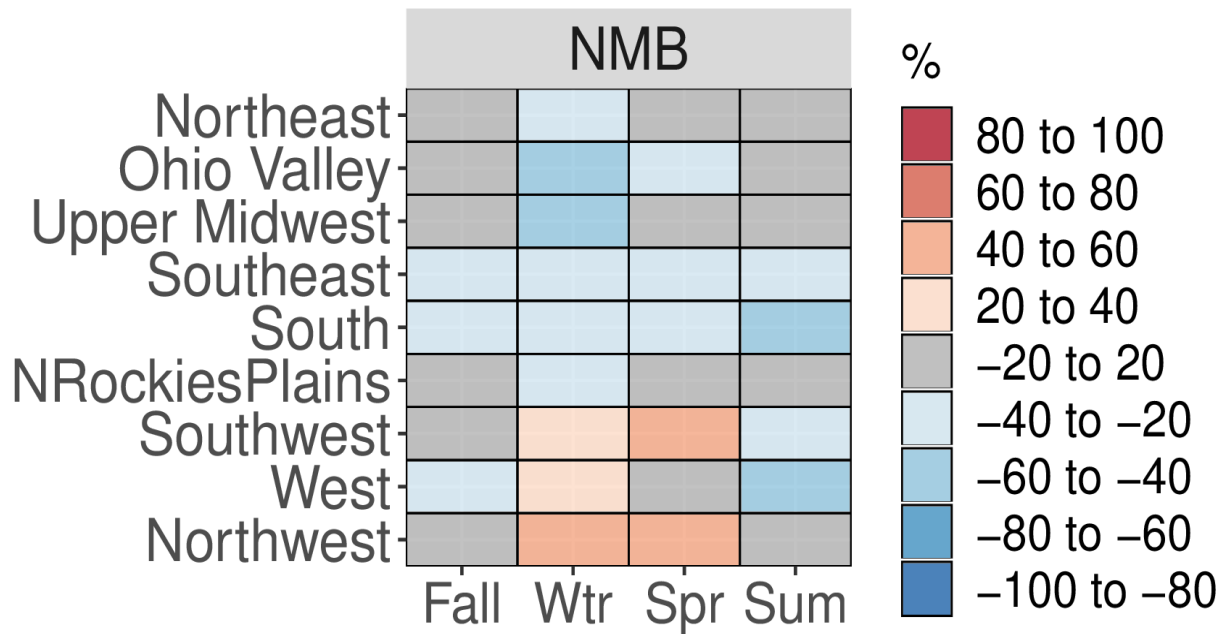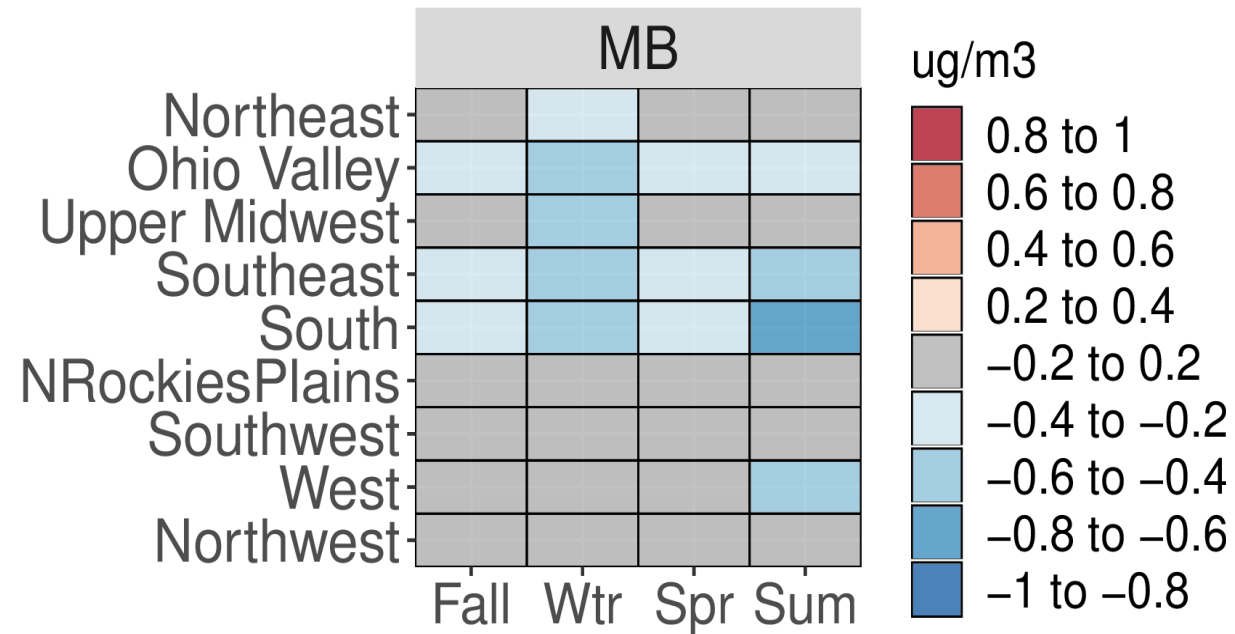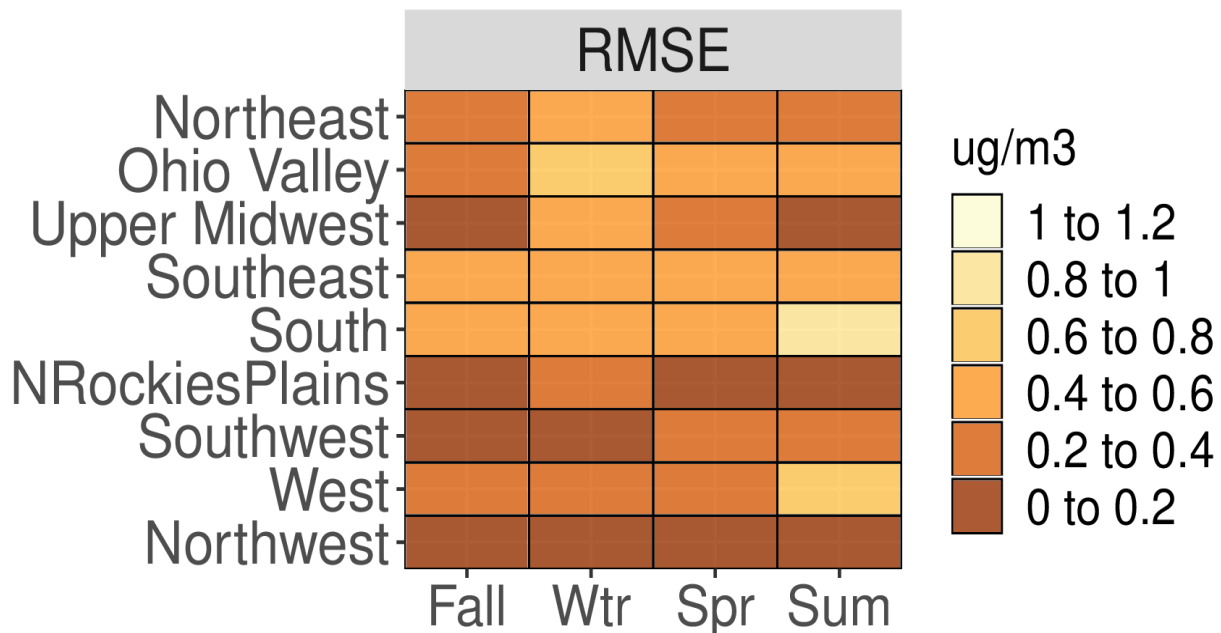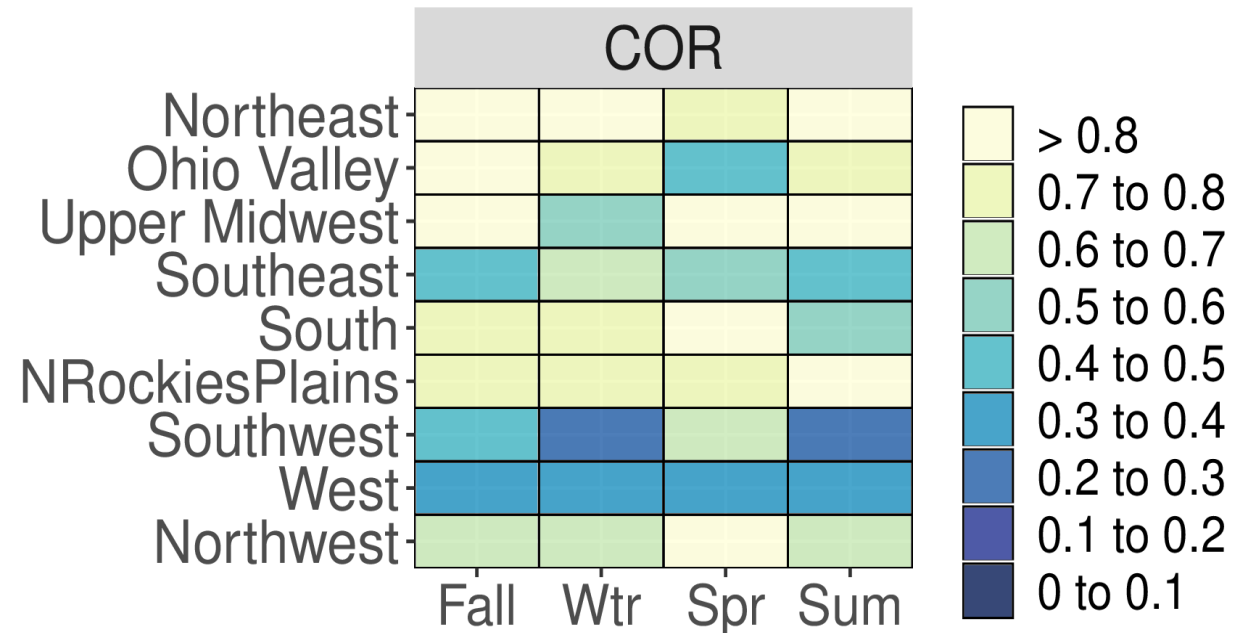

Figure S43. Categorical NMB (%), MB ( $\mu\text{g m}^{-3}$ ), RMSE ( $\mu\text{g m}^{-3}$ ), and Pearson correlation values for  $\text{SO}_4^{2-}$  for all CASTNet sites based on season and NOAA climate region for the CMAQ521 simulation.

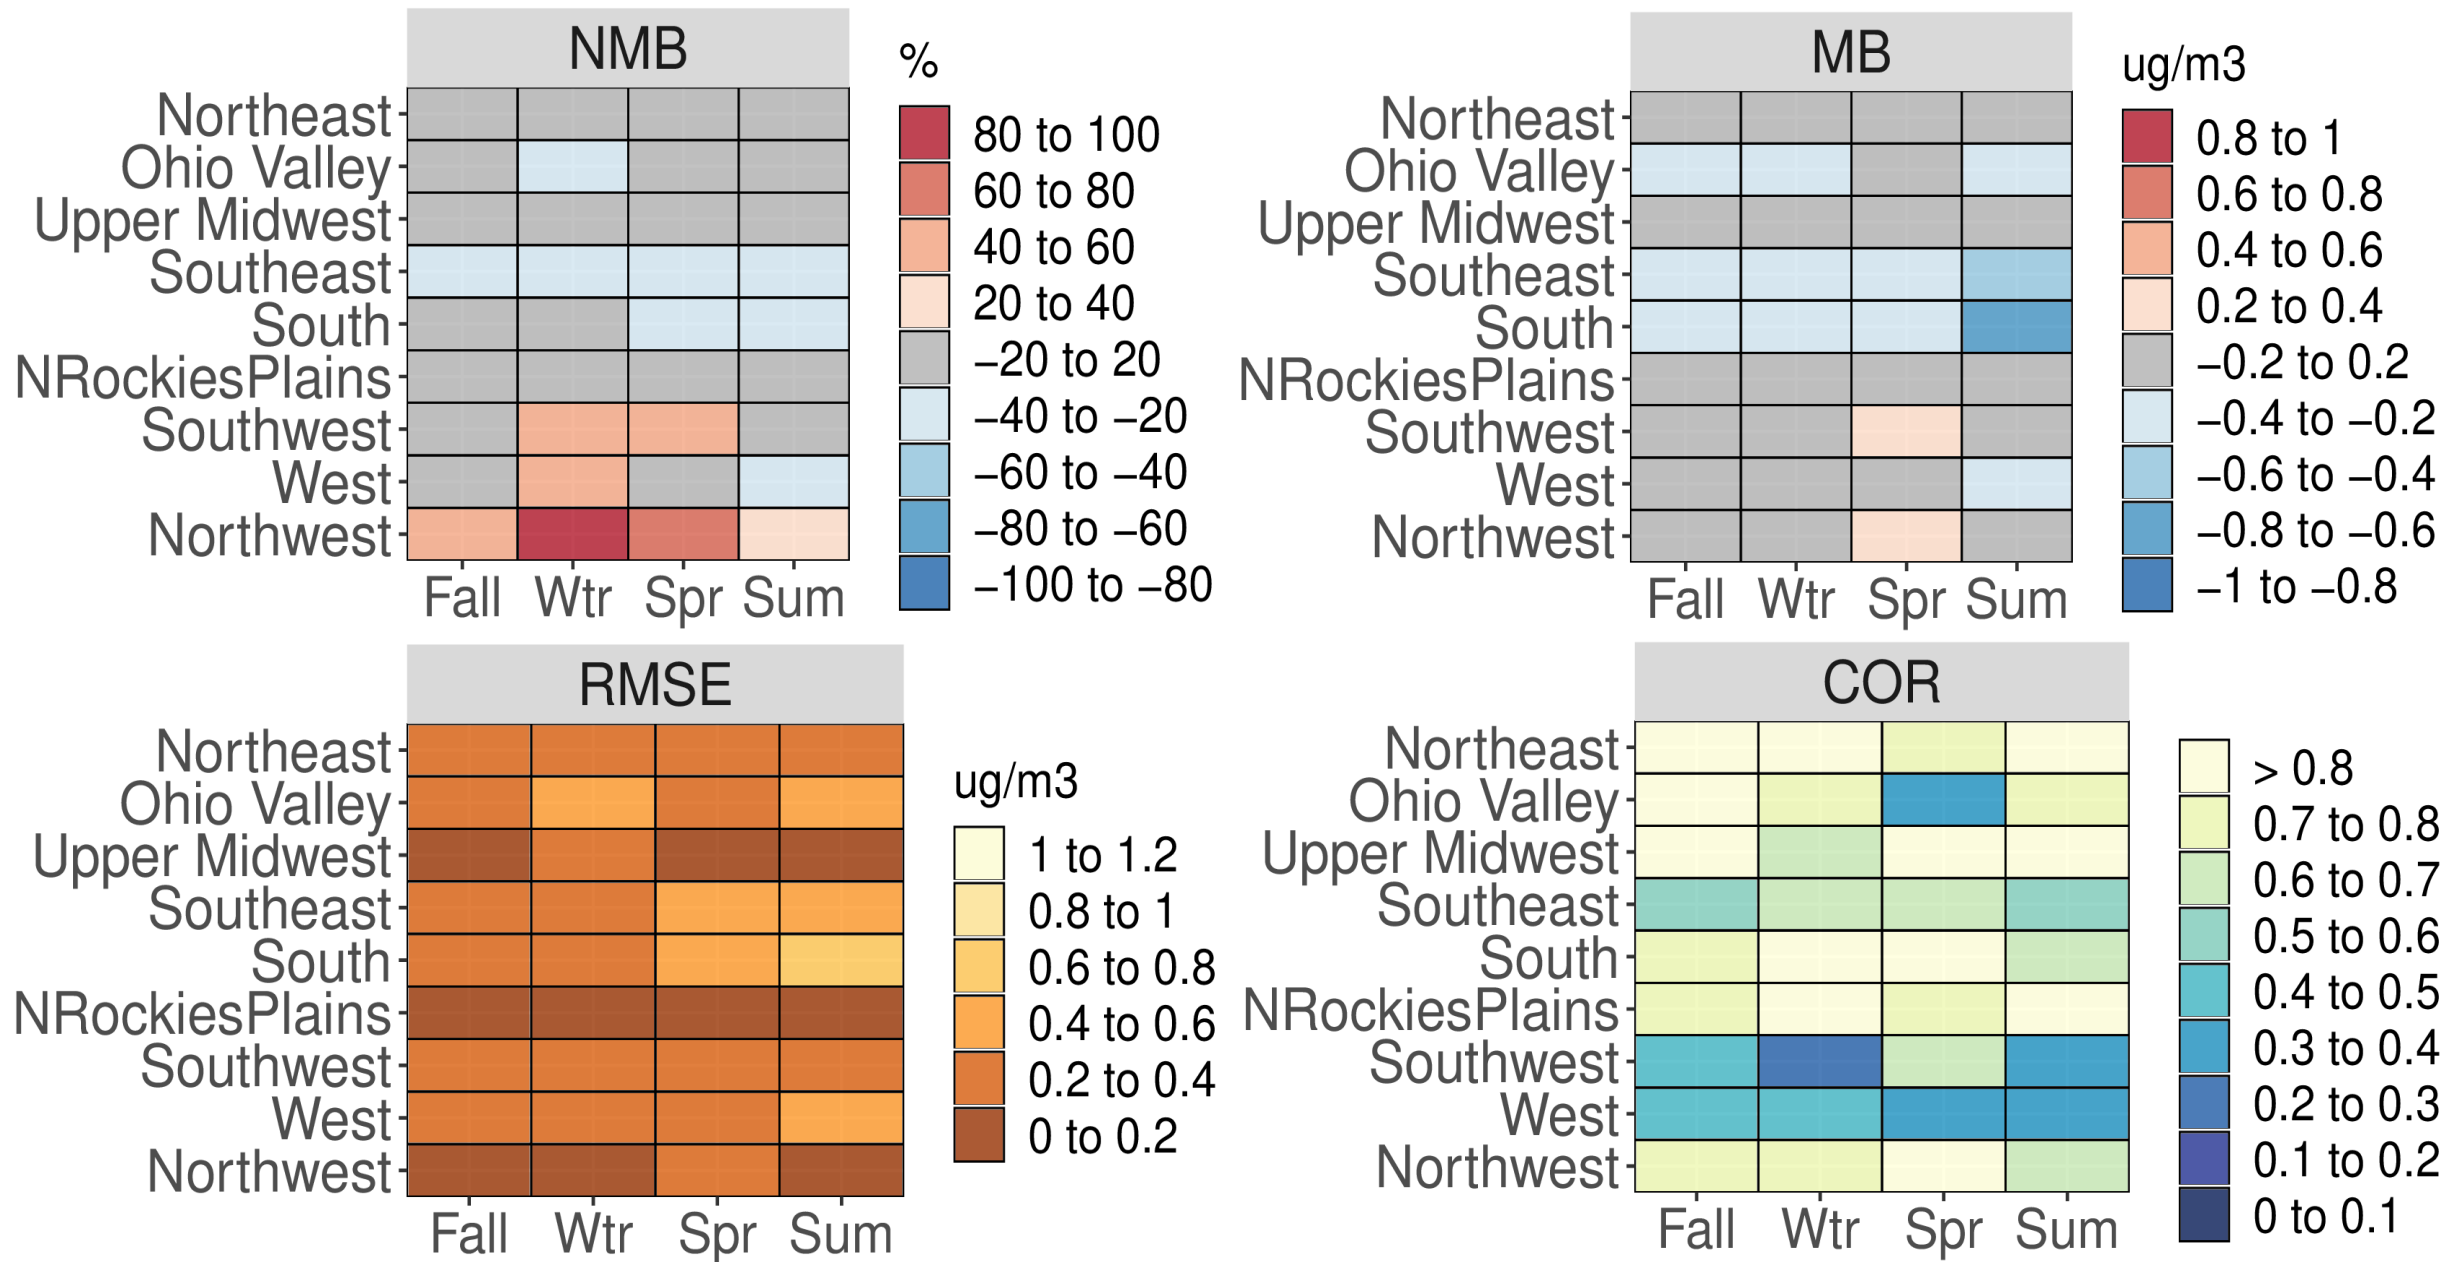

Figure S44. Categorical NMB (%), MB ( $\mu\text{g m}^{-3}$ ), RMSE ( $\mu\text{g m}^{-3}$ ), and Pearson correlation values for  $\text{SO}_4^{2-}$  for all CASTNet sites based on season and NOAA climate region for the CMAQ531\_WRF411\_M3Dry\_BiDi simulation.

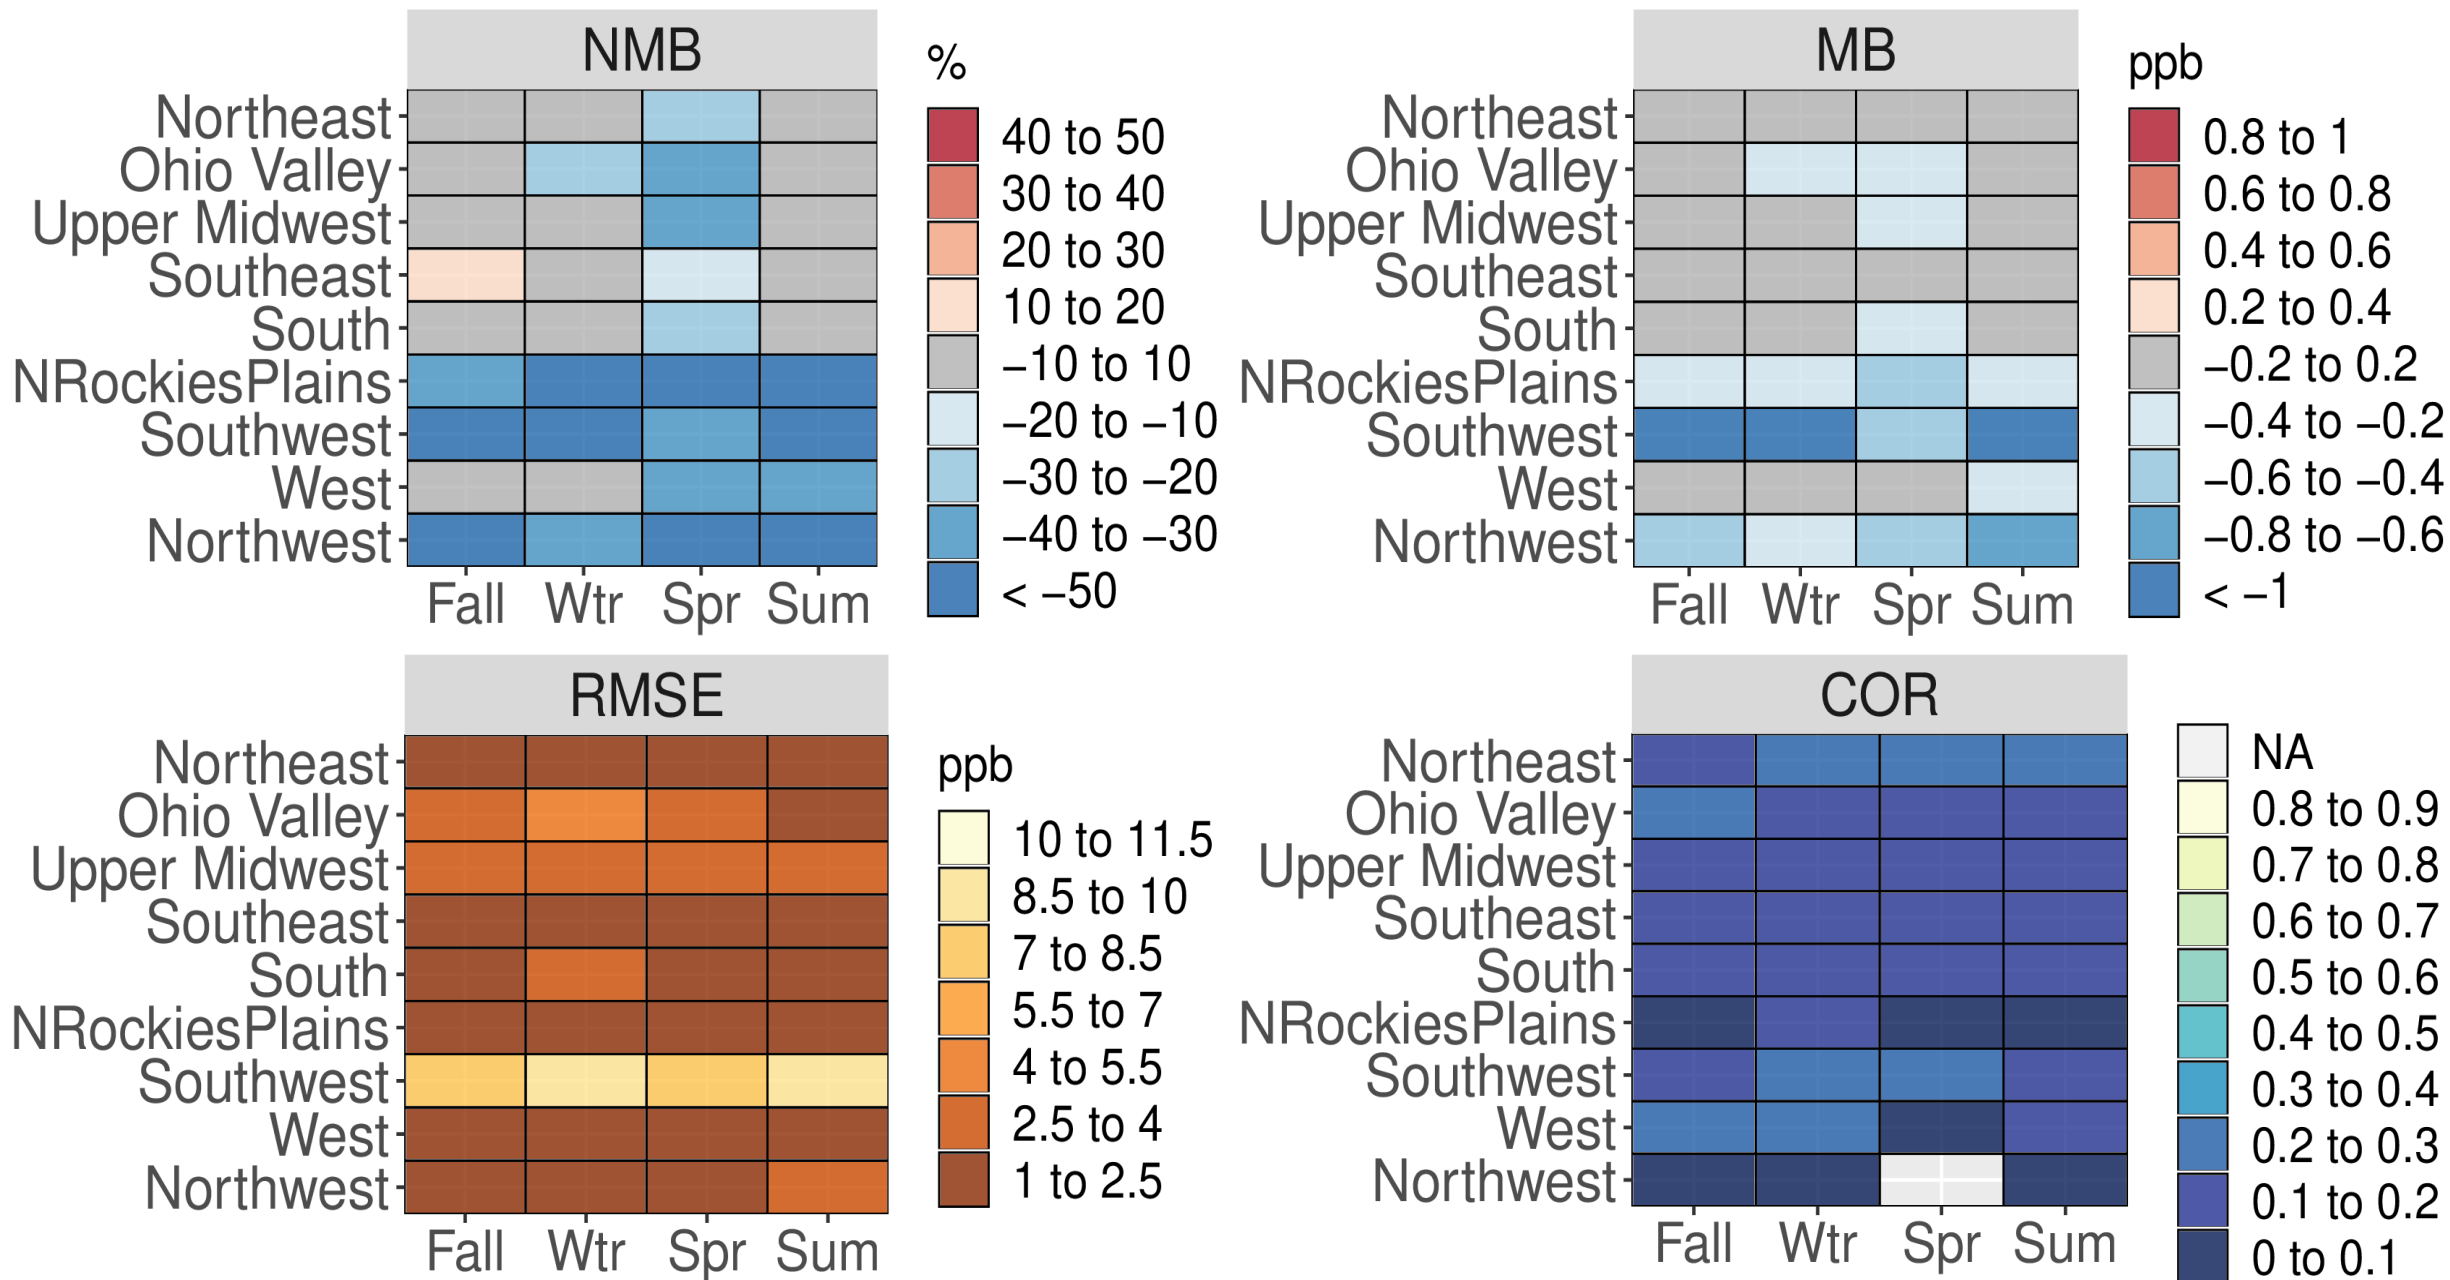

Figure S45. Categorical NMB (%), MB (ppbv), RMSE (ppbv), and Pearson correlation values for SO<sub>2</sub> (hourly) for all AQS sites based on season and NOAA climate region for the CMAQ521 simulation.



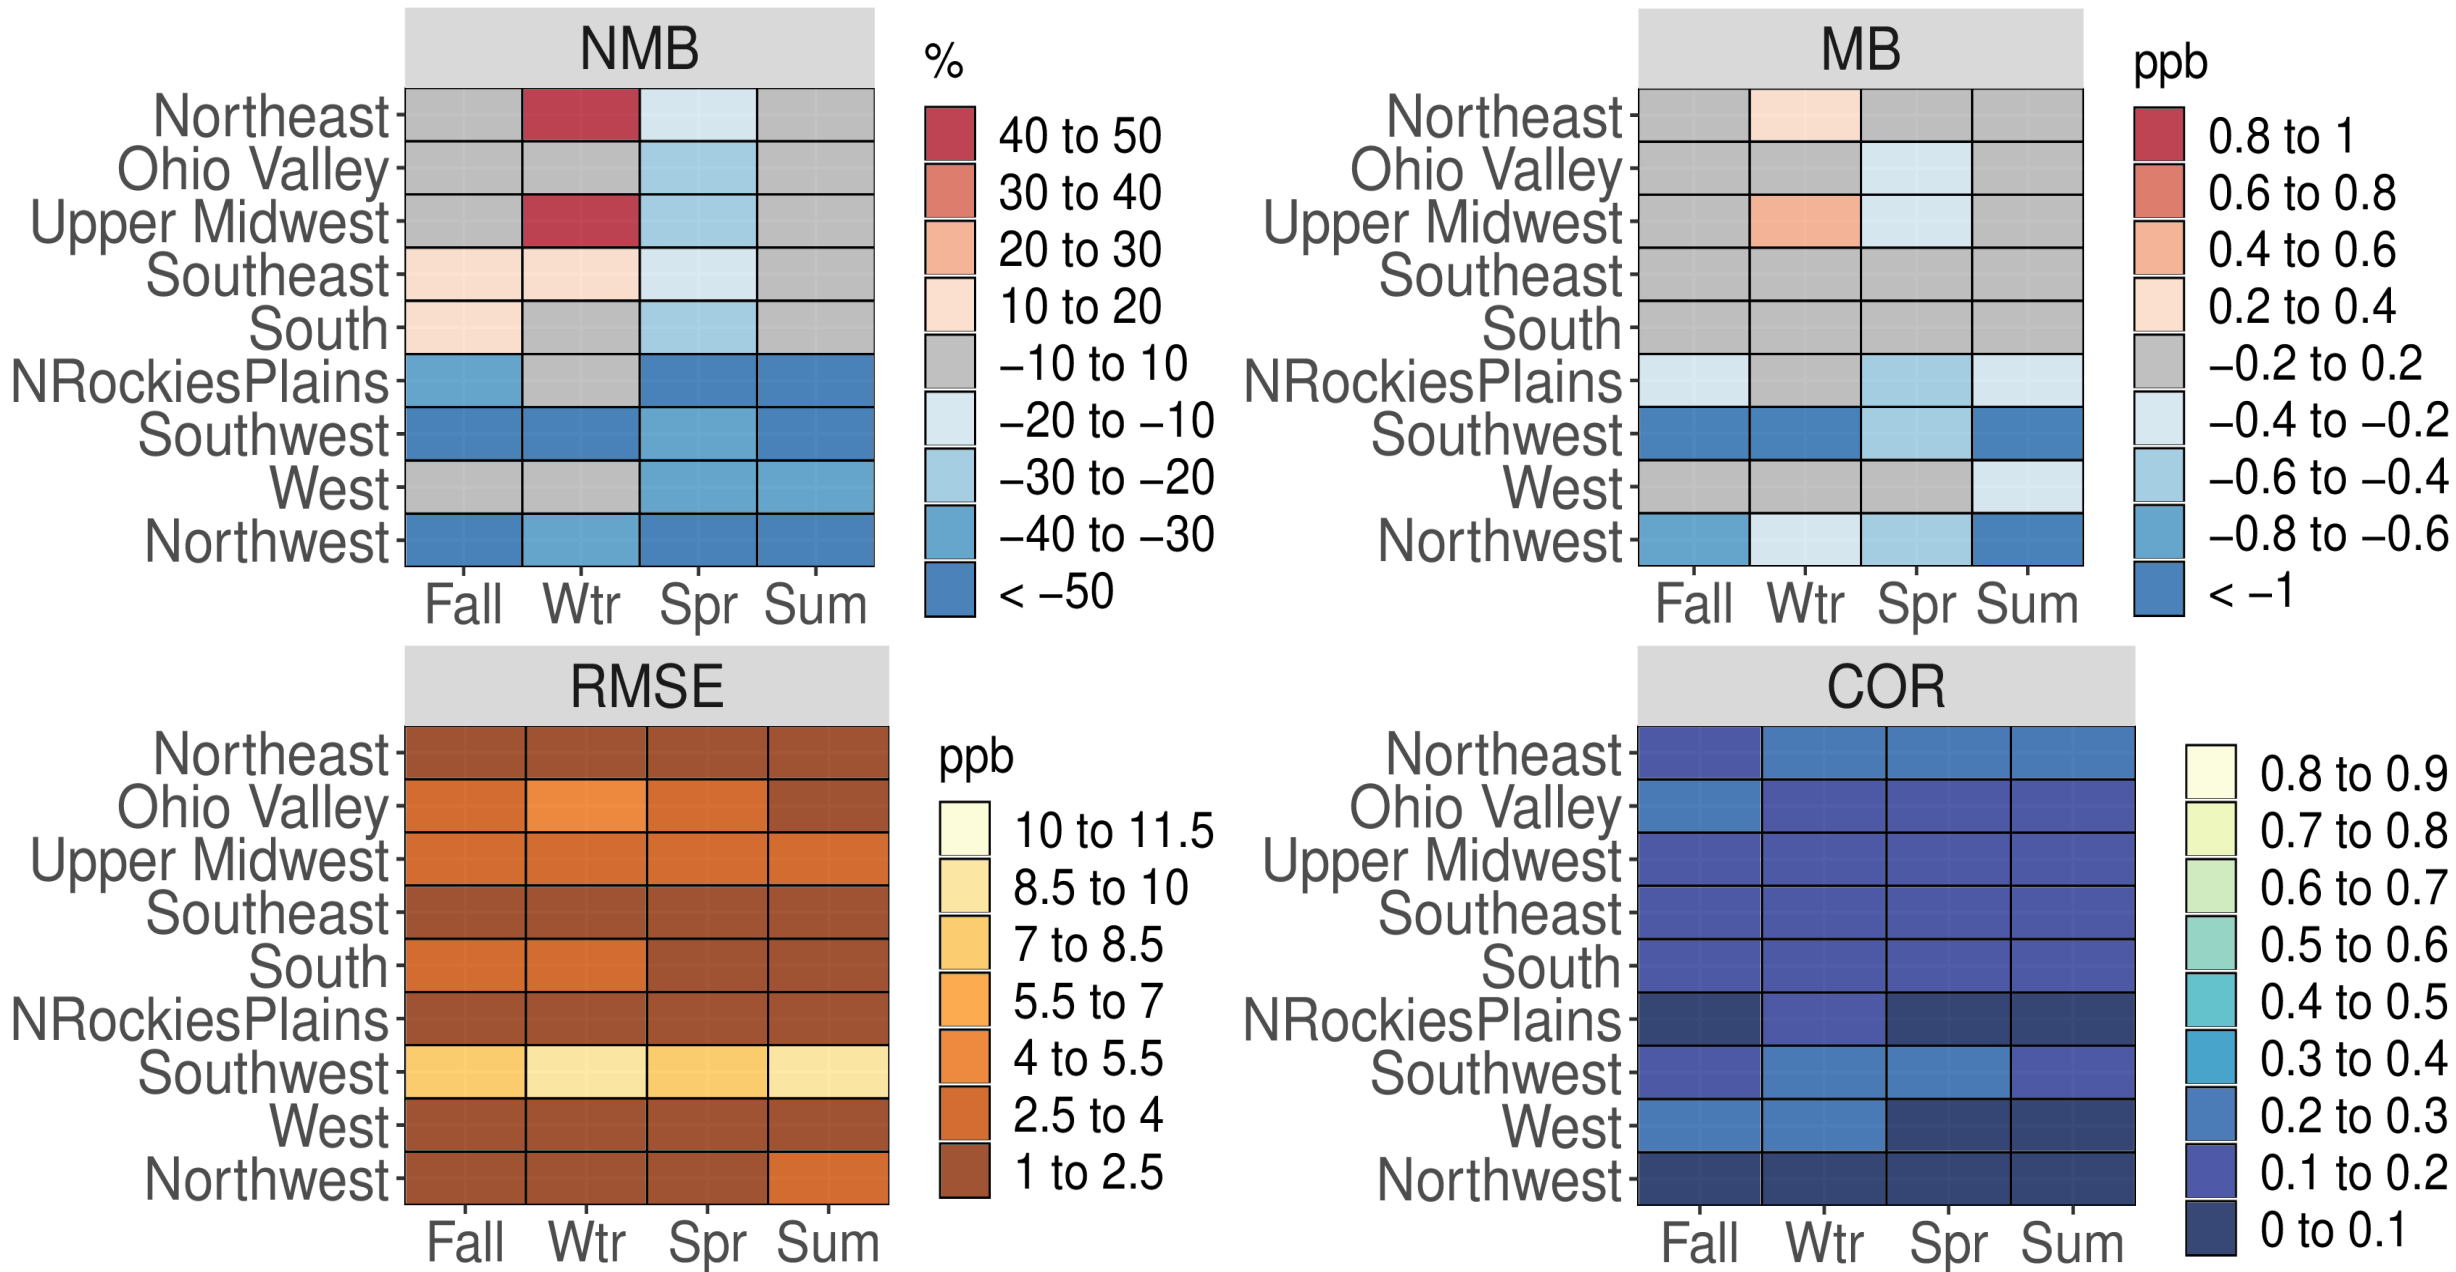

Figure S46. Categorical NMB (%), MB (ppbv), RMSE (ppbv), and Pearson correlation values for SO<sub>2</sub> (hourly) for all AQS sites based on season and NOAA climate region for the CMAQ531\_WRF411\_M3Dry\_BiDi simulation.

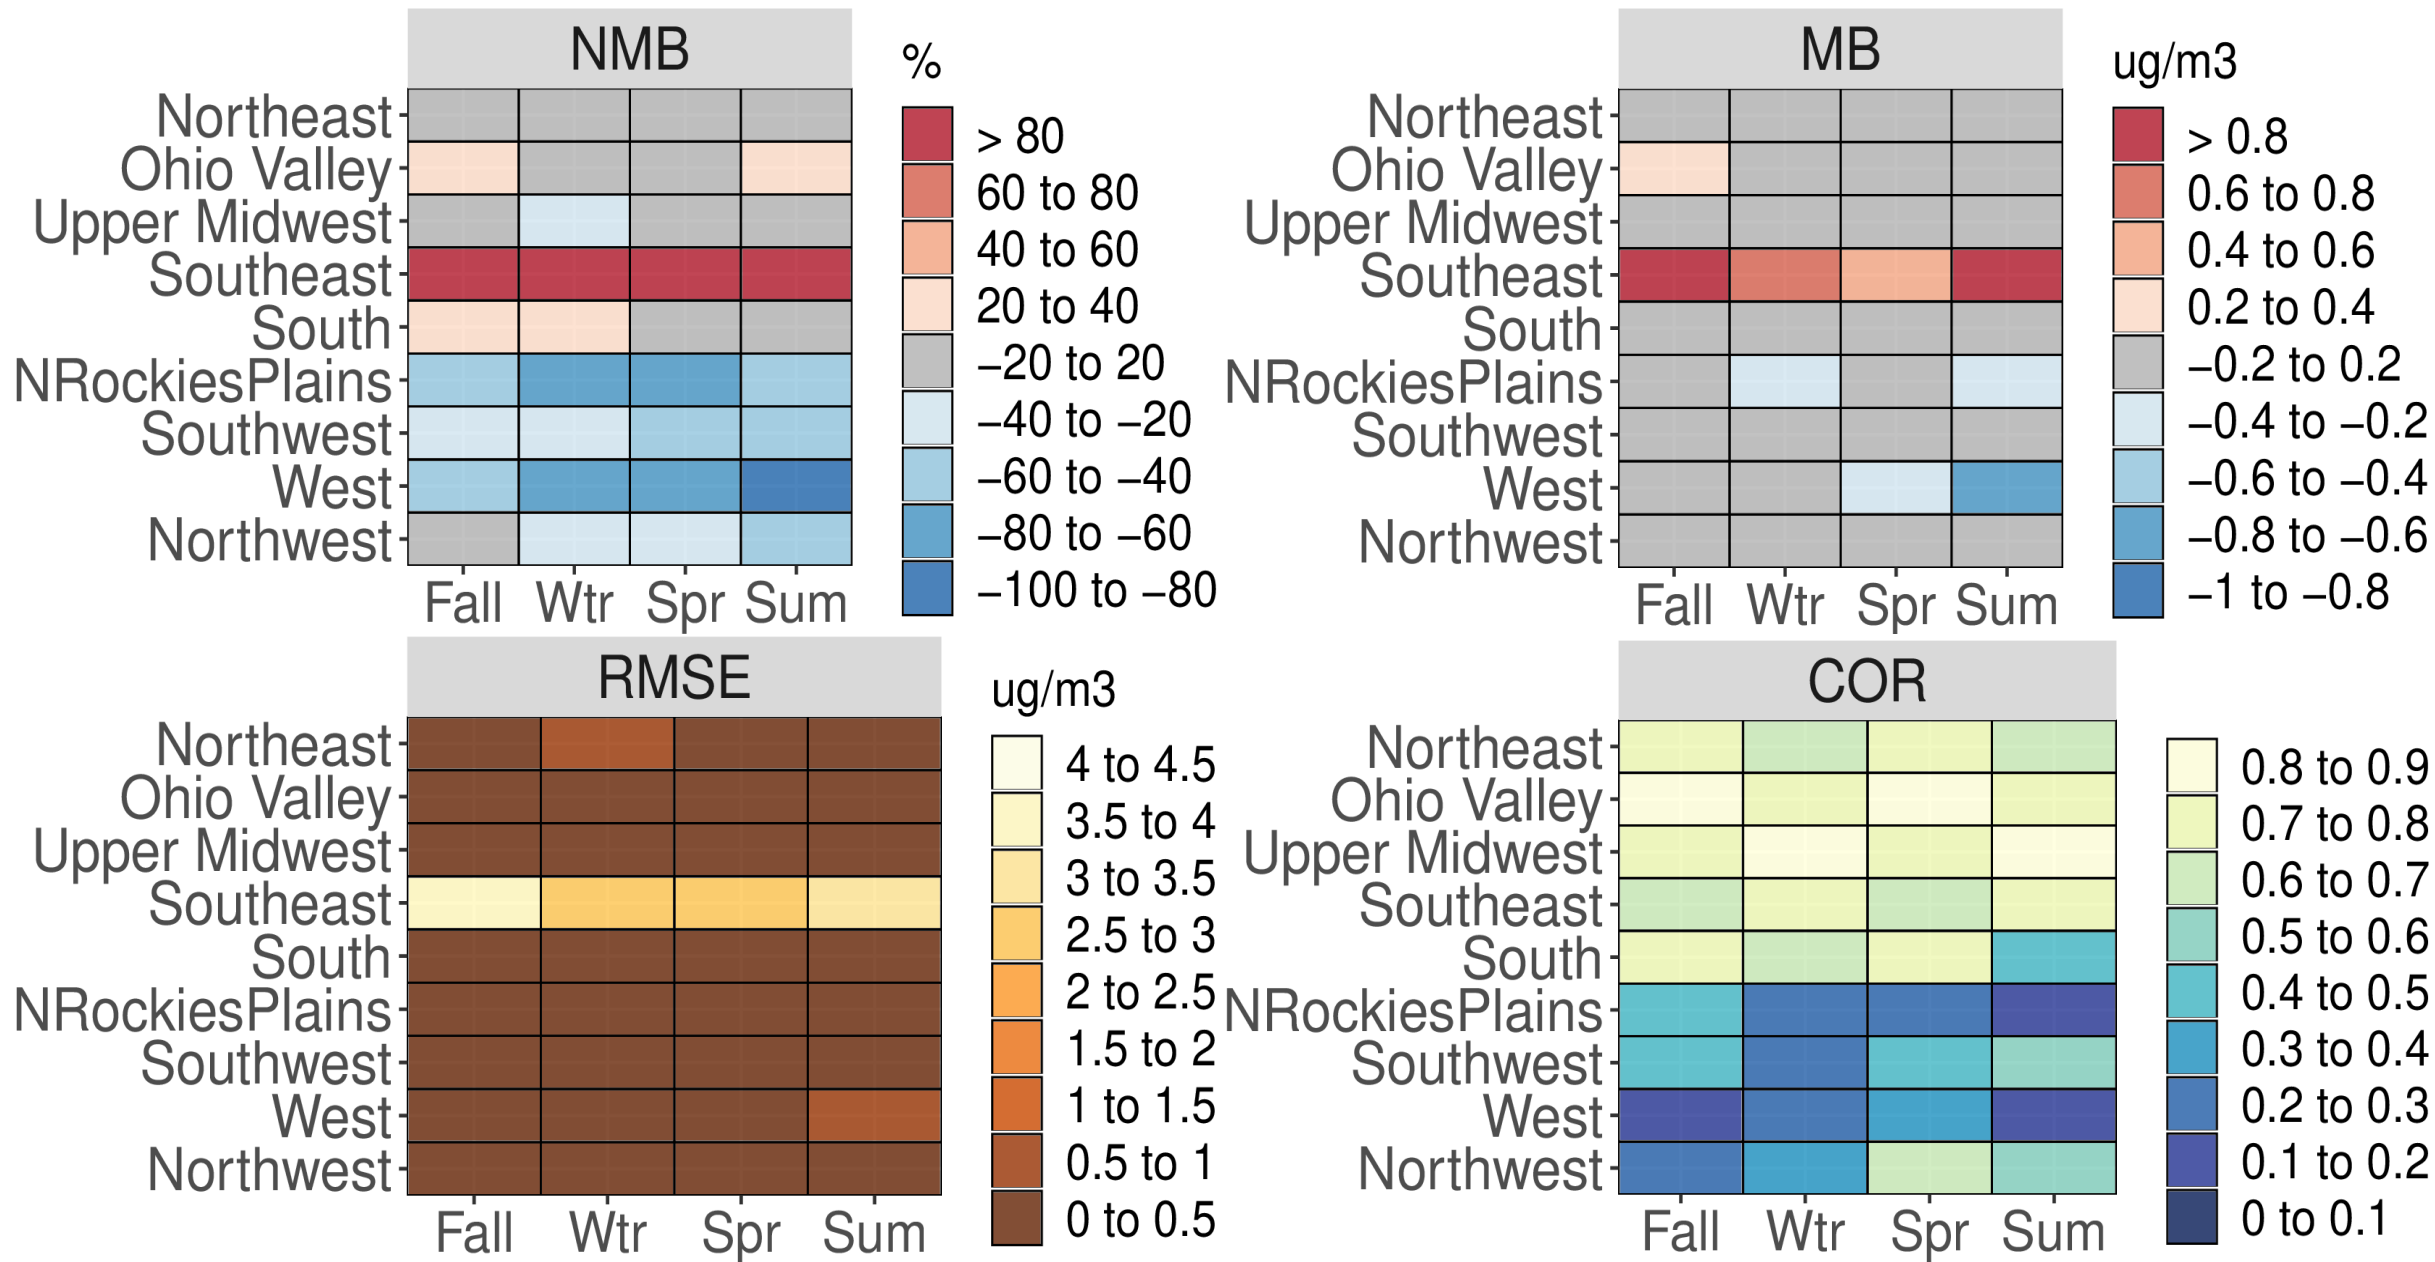

Figure S47. Categorical NMB (%), MB ( $\mu\text{g m}^{-3}$ ), RMSE ( $\mu\text{g m}^{-3}$ ), and Pearson correlation values for SO<sub>2</sub> (weekly) for all CASTNET sites based on season and NOAA climate region for the CMAQ521 simulation.

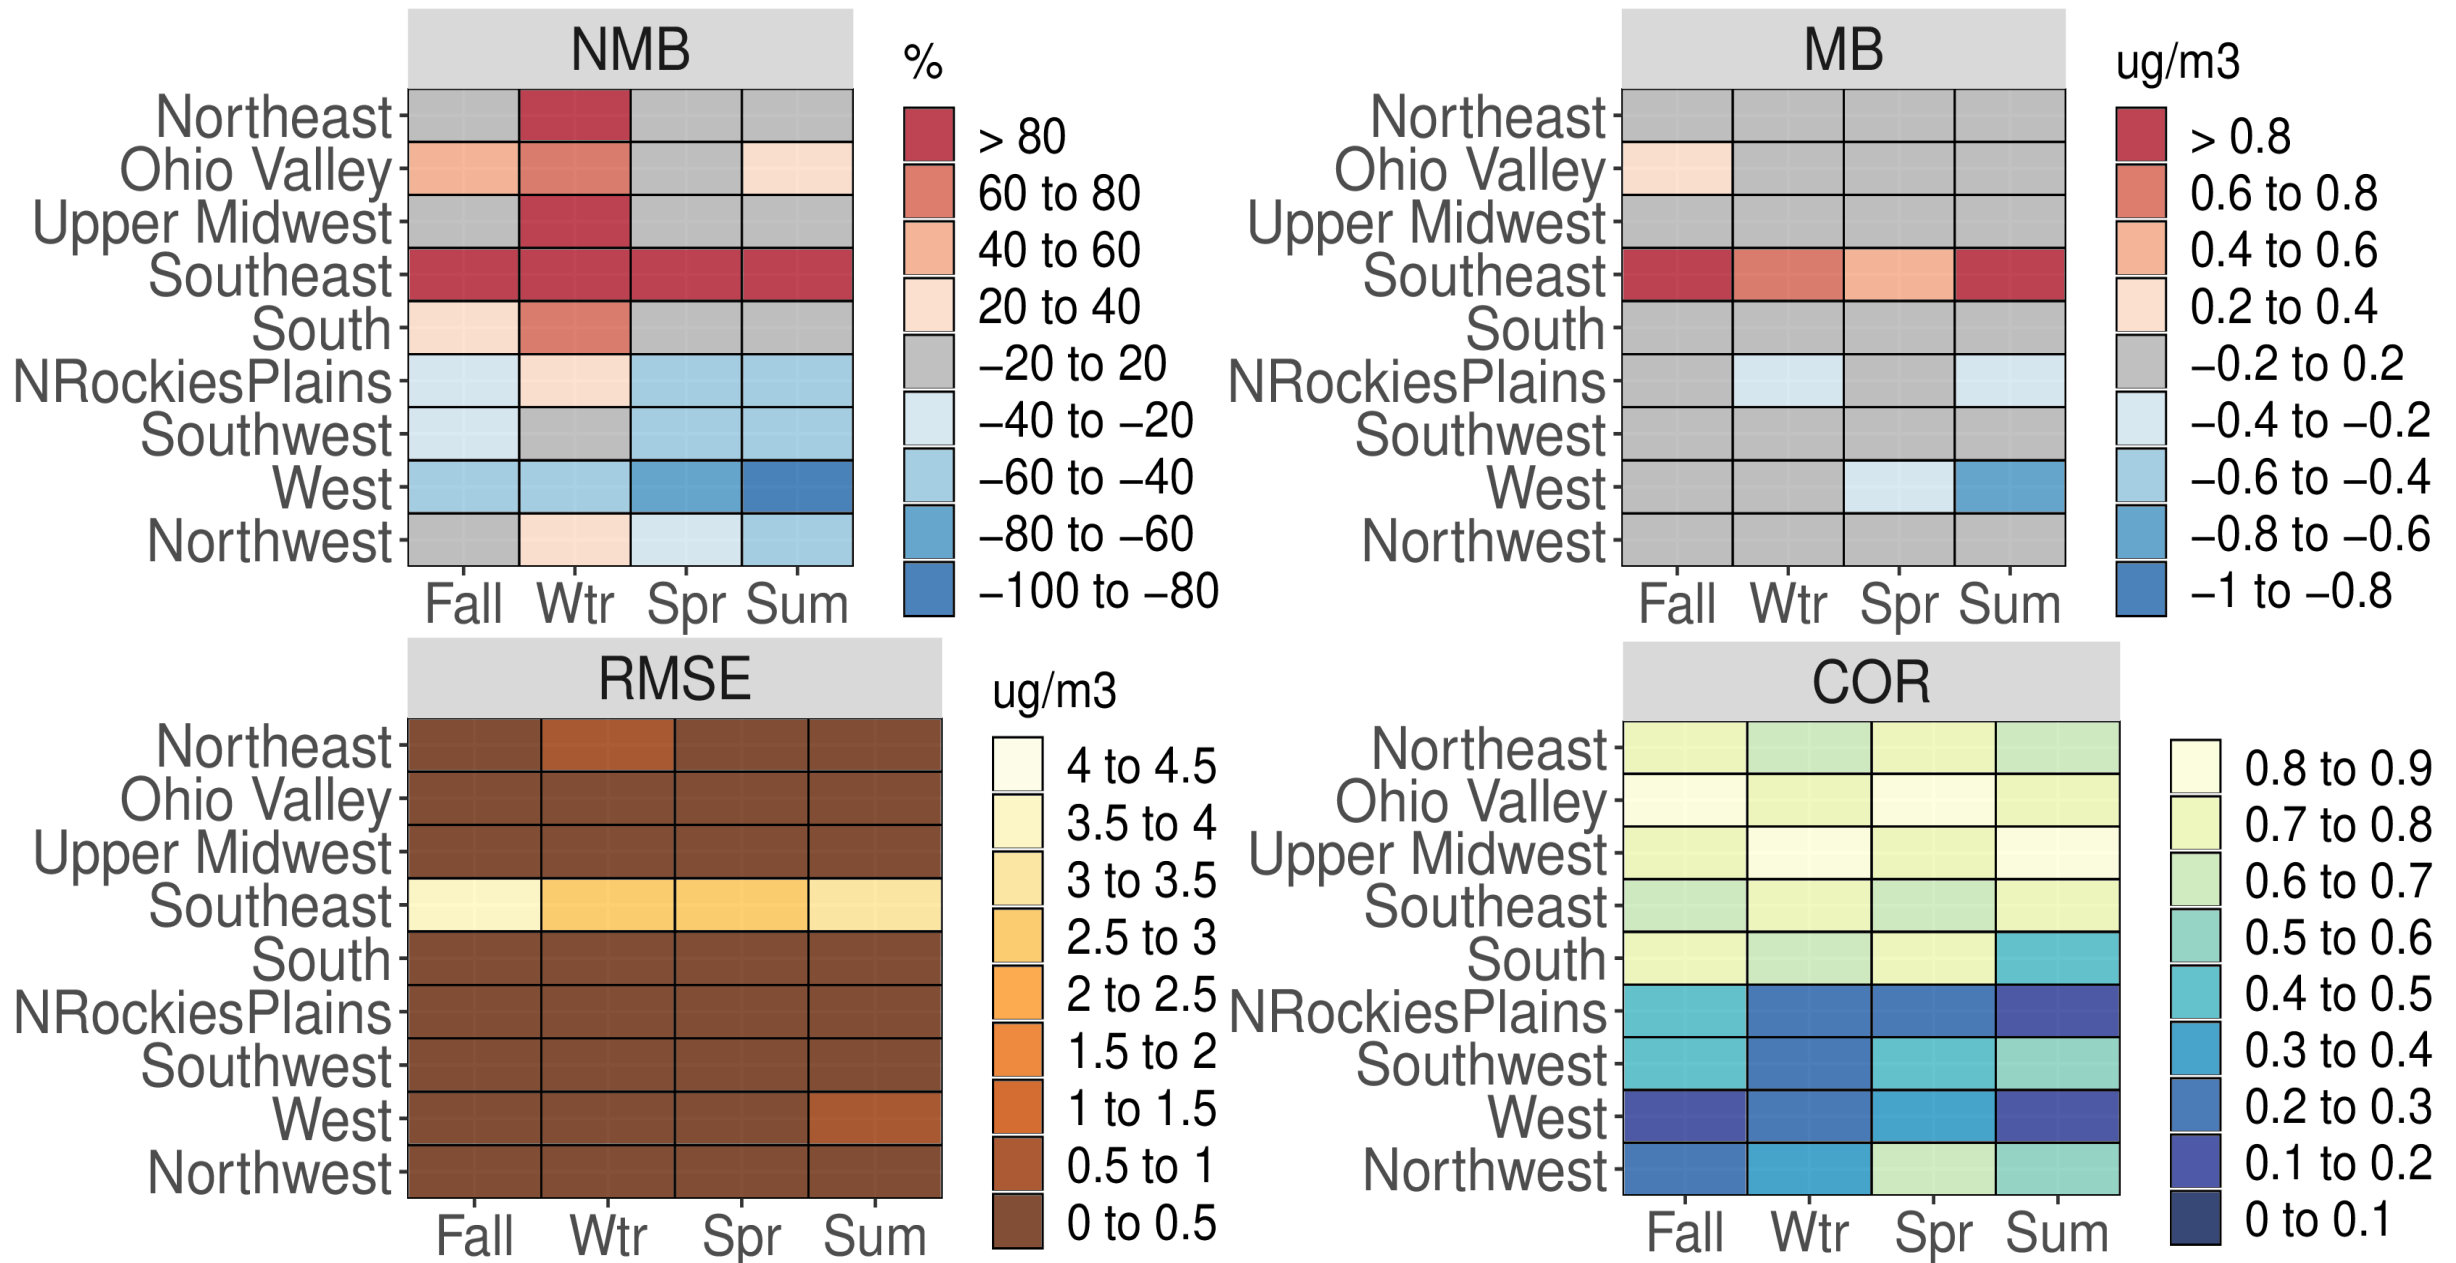

Figure S48. Categorical NMB (%), MB ( $\mu\text{g m}^{-3}$ ), RMSE ( $\mu\text{g m}^{-3}$ ), and Pearson correlation values for SO<sub>2</sub> (weekly) for all CASTNET sites based on season and NOAA climate region for the CMAQ531\_WRF411\_M3Dry\_BiDi simulation.

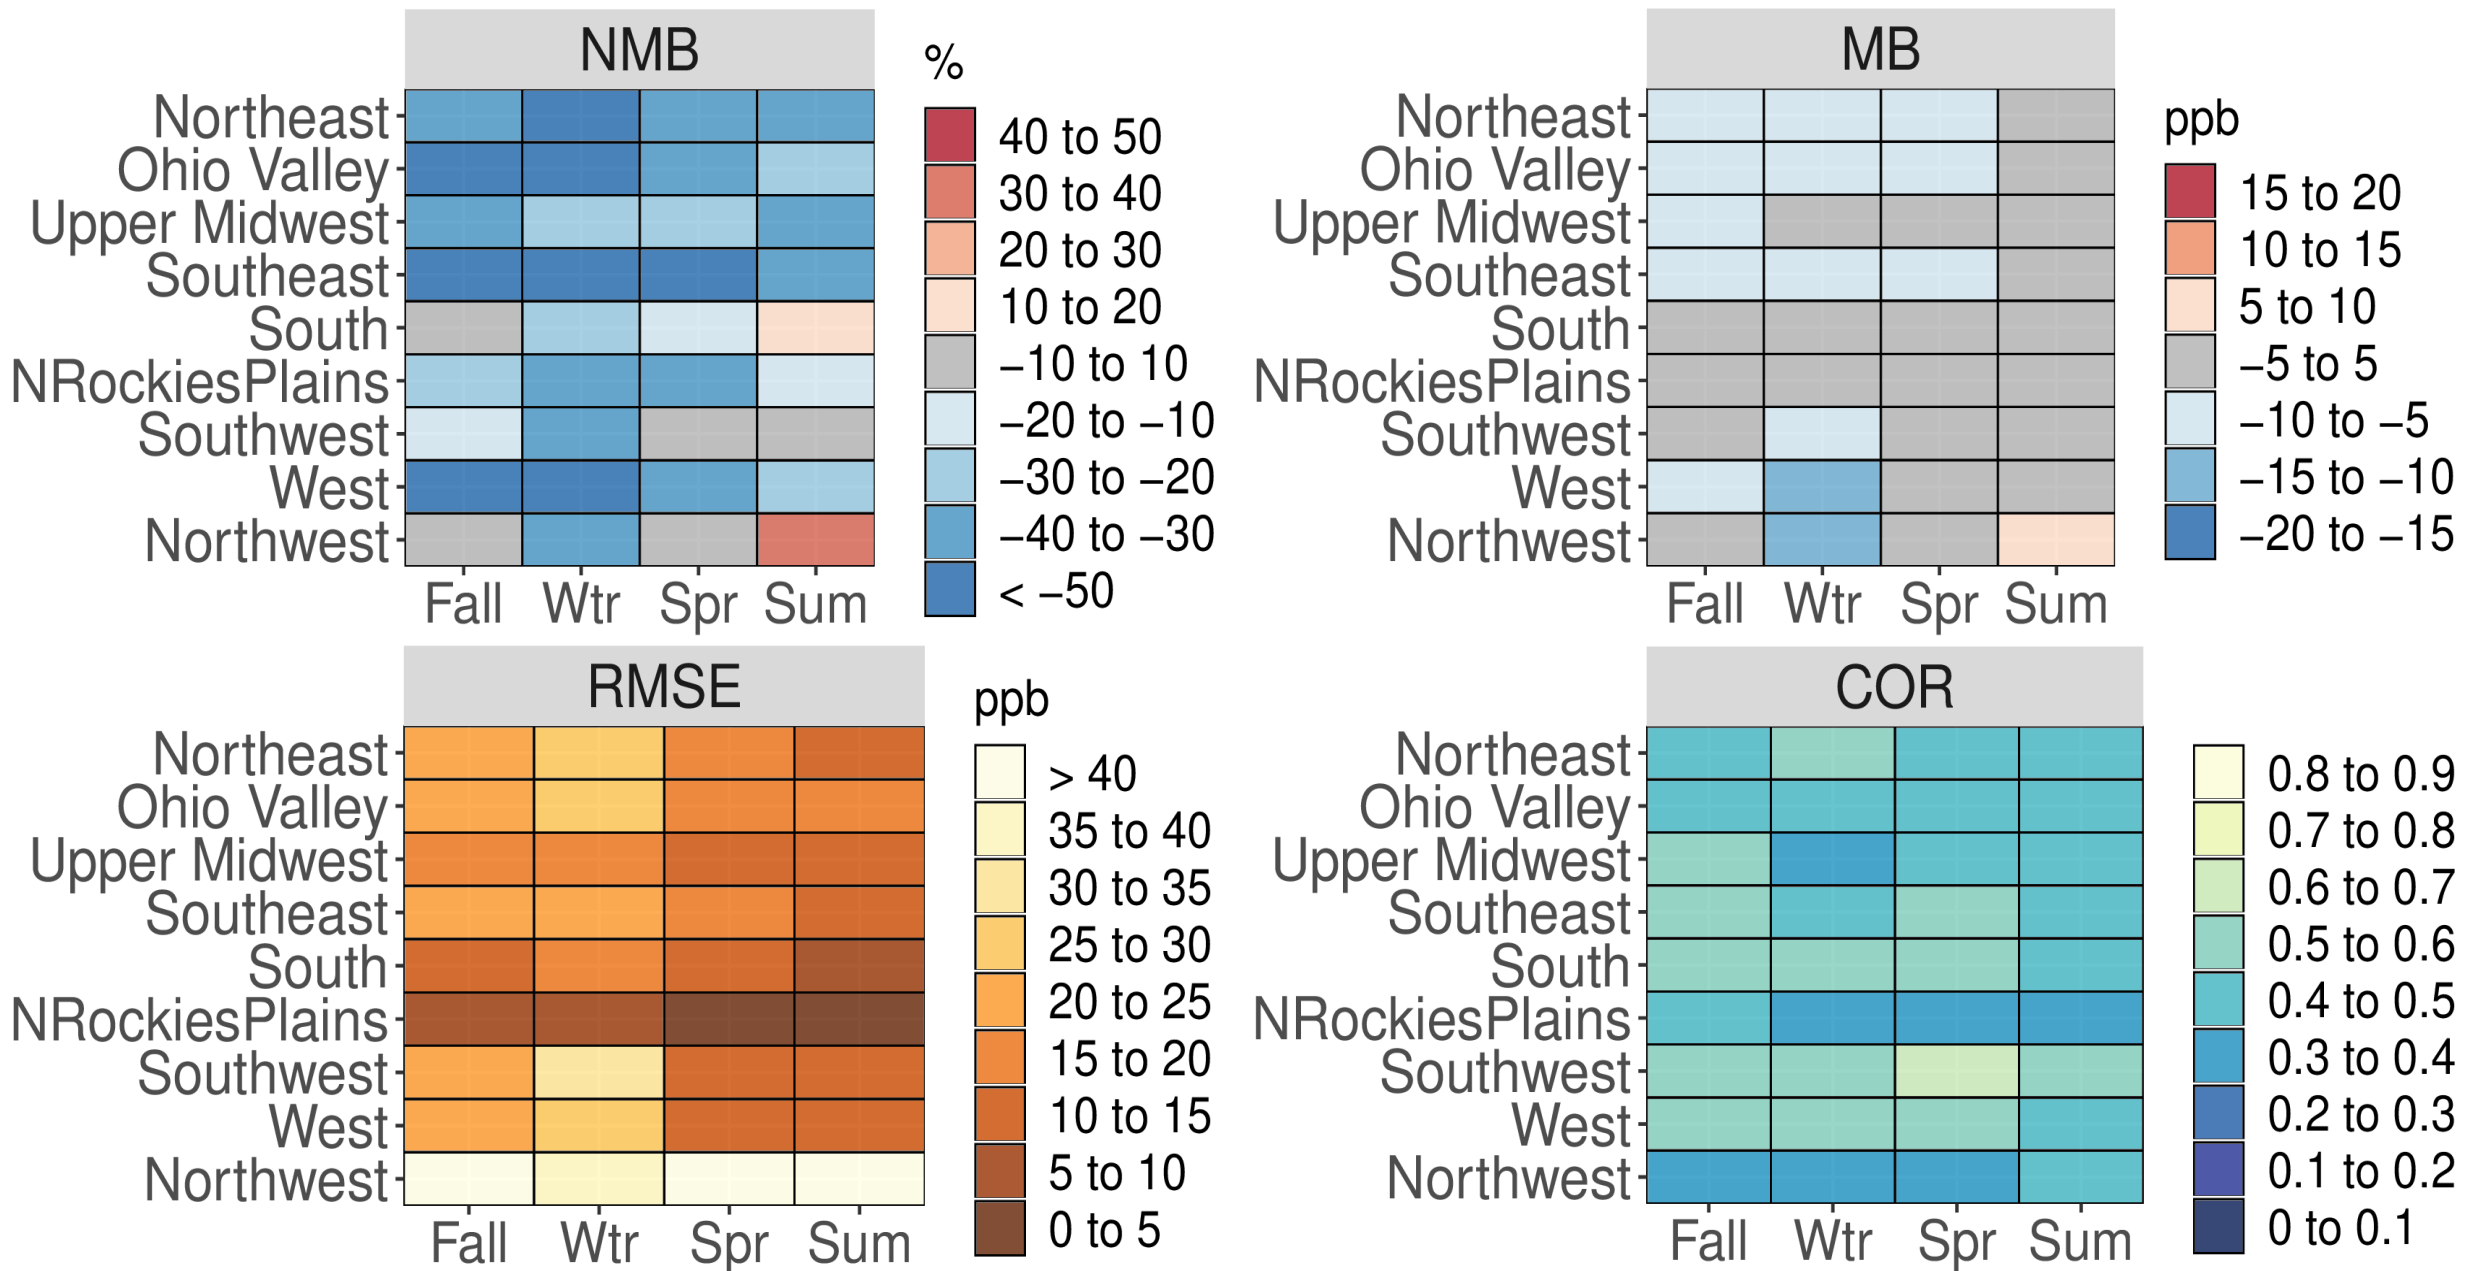

Figure S49. Categorical NMB (%), MB (ppbv), RMSE (ppbv), and Pearson correlation values for NO<sub>x</sub> for all AQS sites based on season and NOAA climate region for the CMAQ521 simulation.

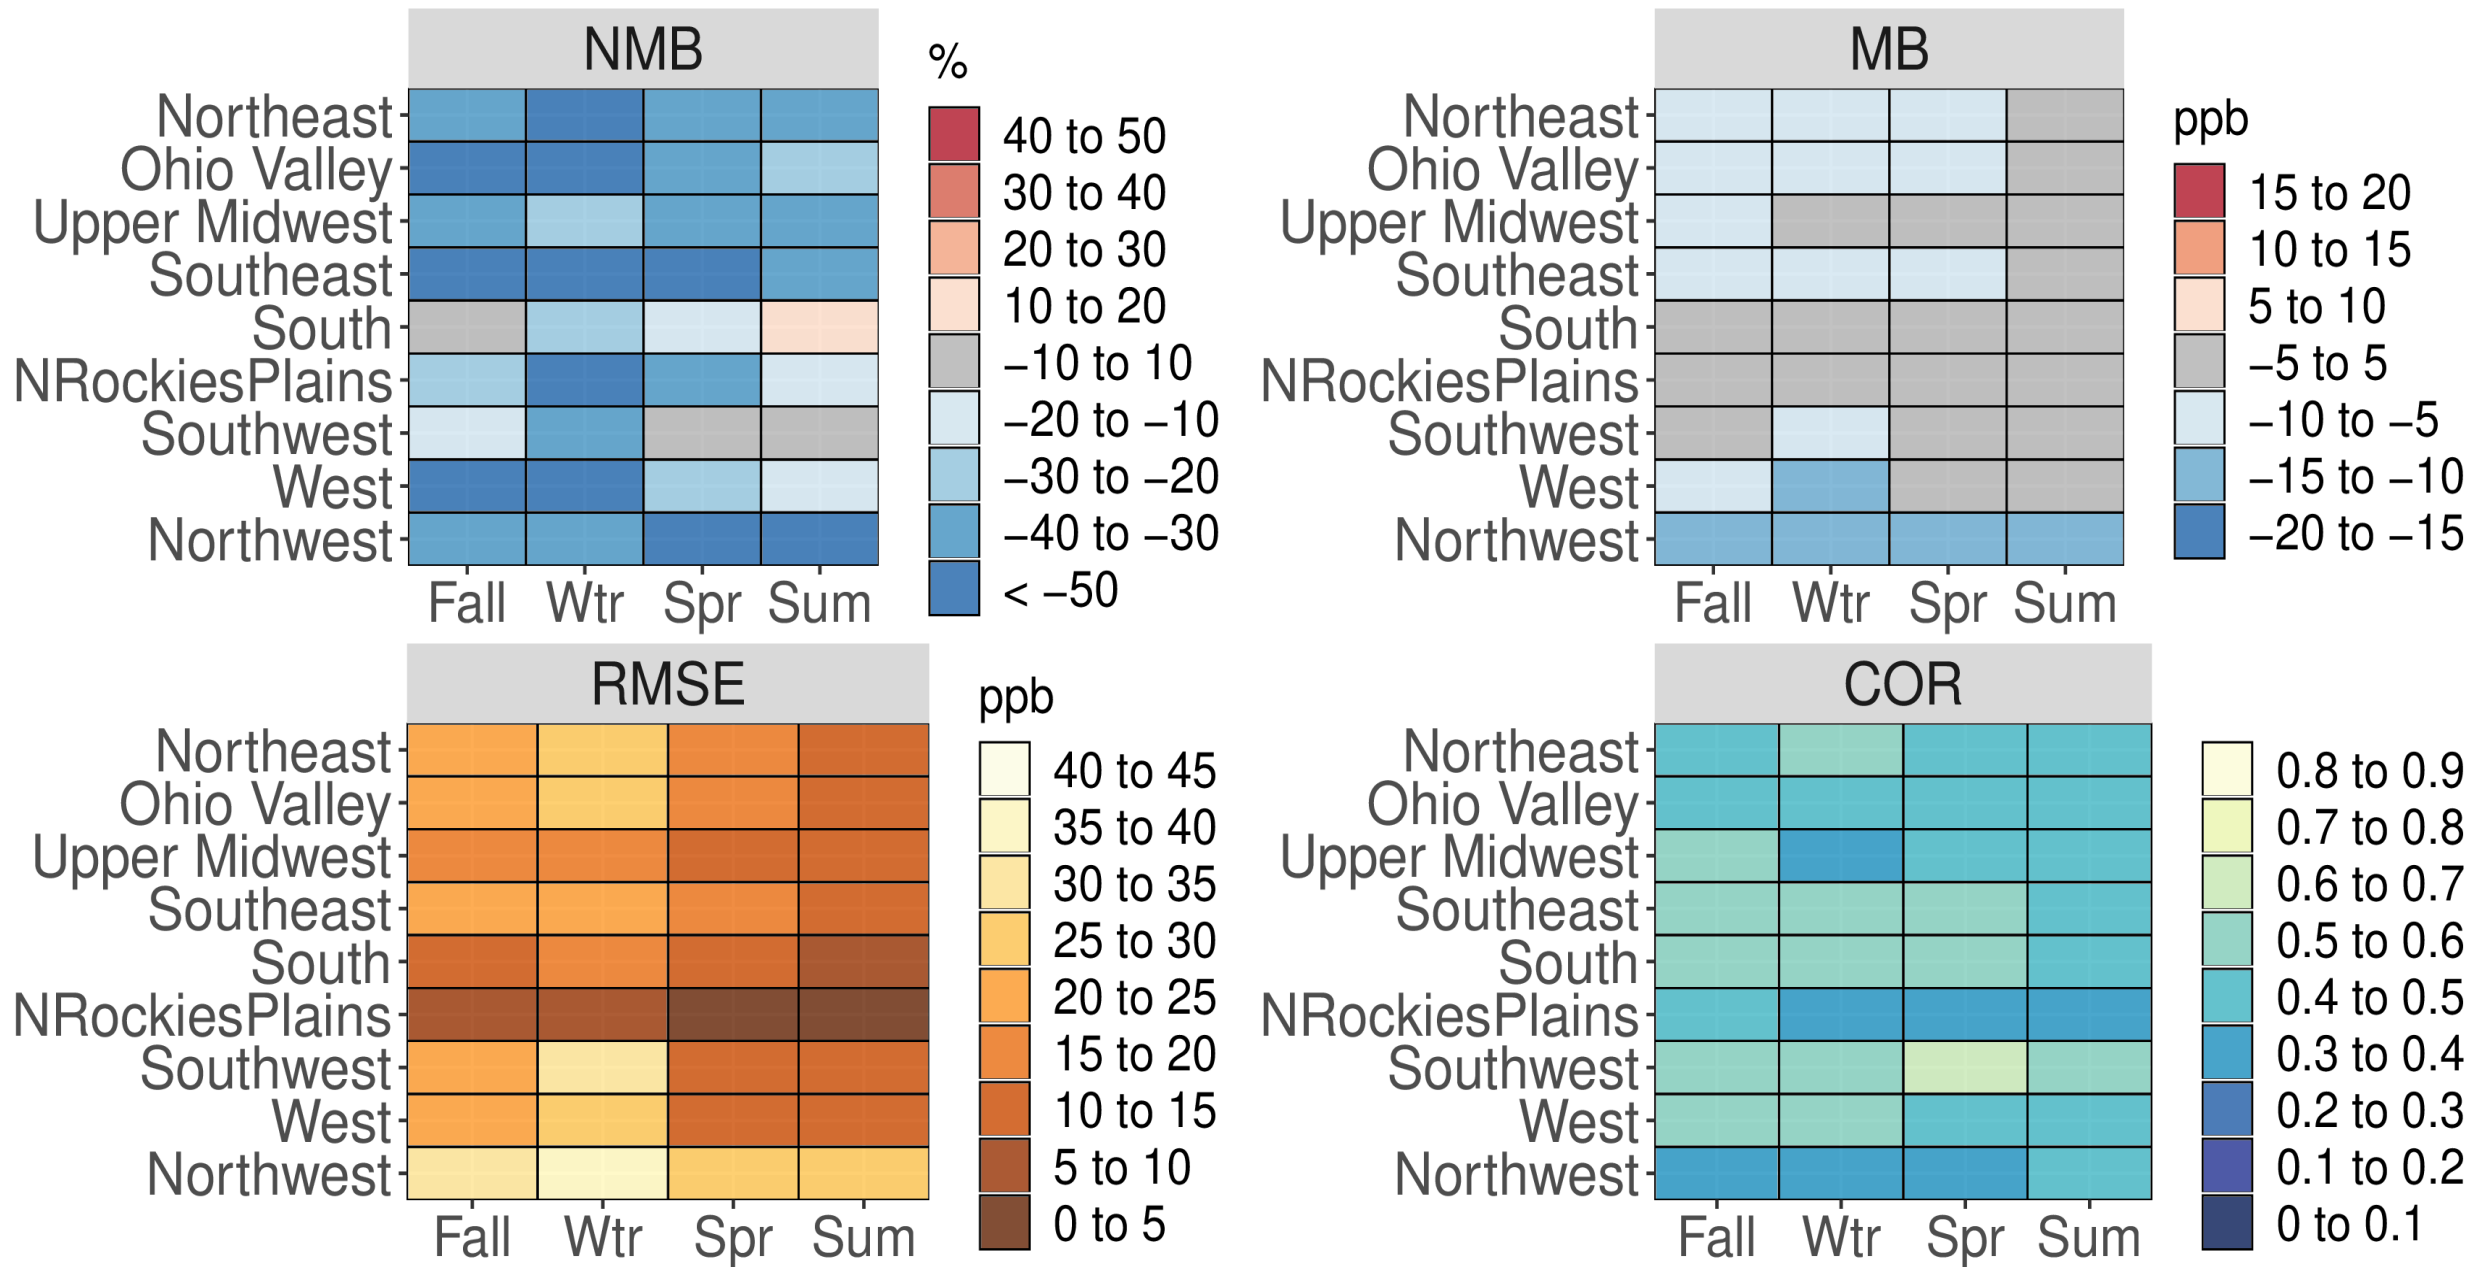

Figure S50. Categorical NMB (%), MB (ppbv), RMSE (ppbv), and Pearson correlation values for NO<sub>x</sub> for all AQS sites based on season and NOAA climate region for the CMAQ531\_WRF411\_M3Dry\_BiDi simulation.



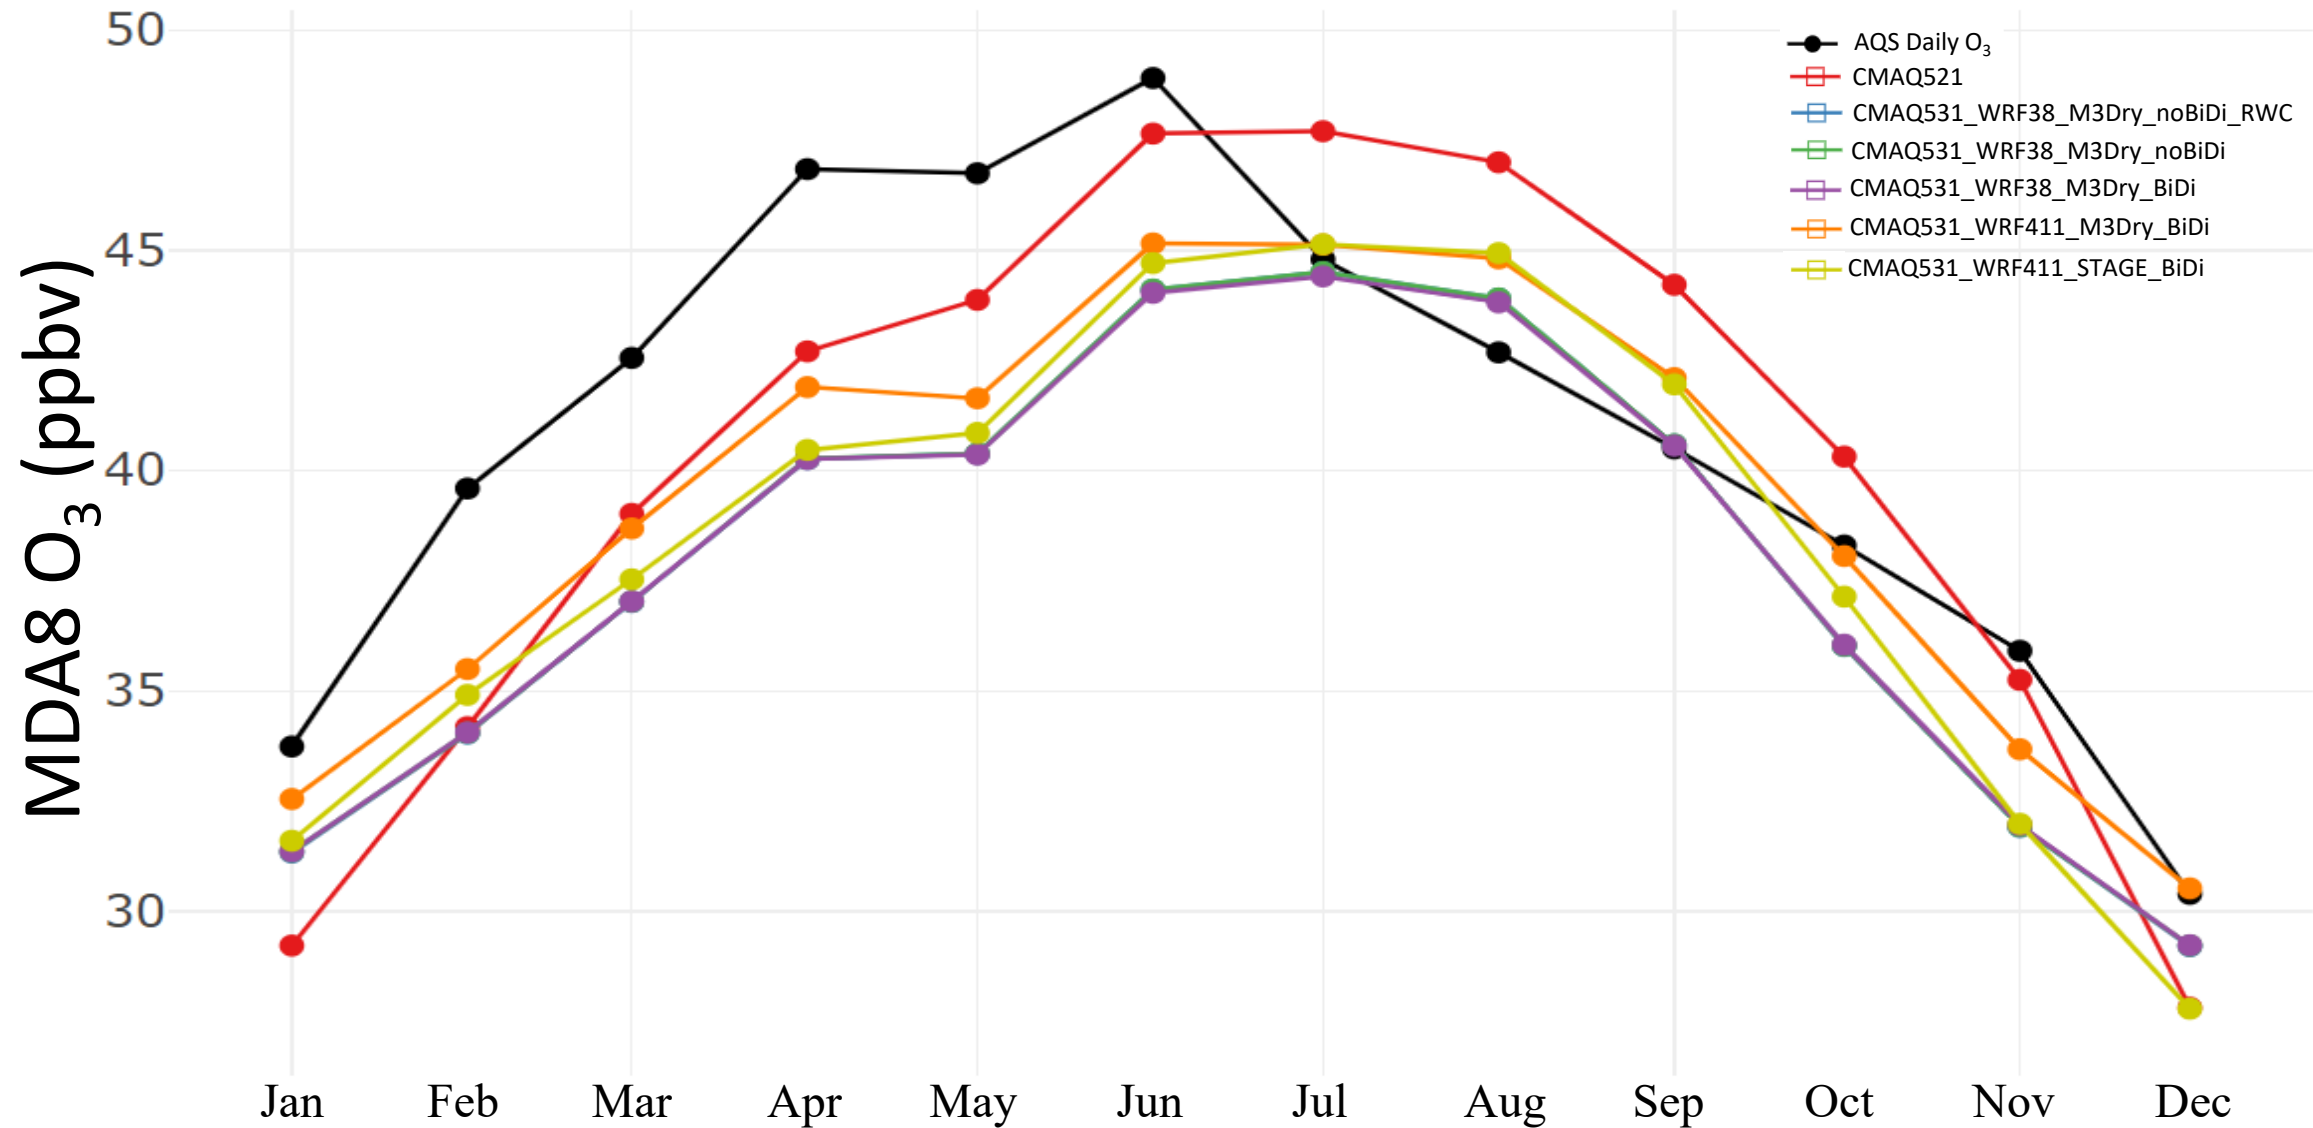

Figure S51. Time series of monthly average MDA8 O<sub>3</sub> mixing ratio (ppbv) for all AQS sites (black), CMAQ521 (red), CMAQ531\_WRF38\_M3Dry\_noBiDi\_RWC (blue), CMAQ531\_WRF38\_M3Dry\_noBiDi (green), CMAQ531\_WRF38\_M3Dry\_BiDi (purple), CMAQ531\_WRF411\_M3Dry\_BiDi (orange), and CMAQ531\_WRF411\_STAGE\_BiDi (yellow).

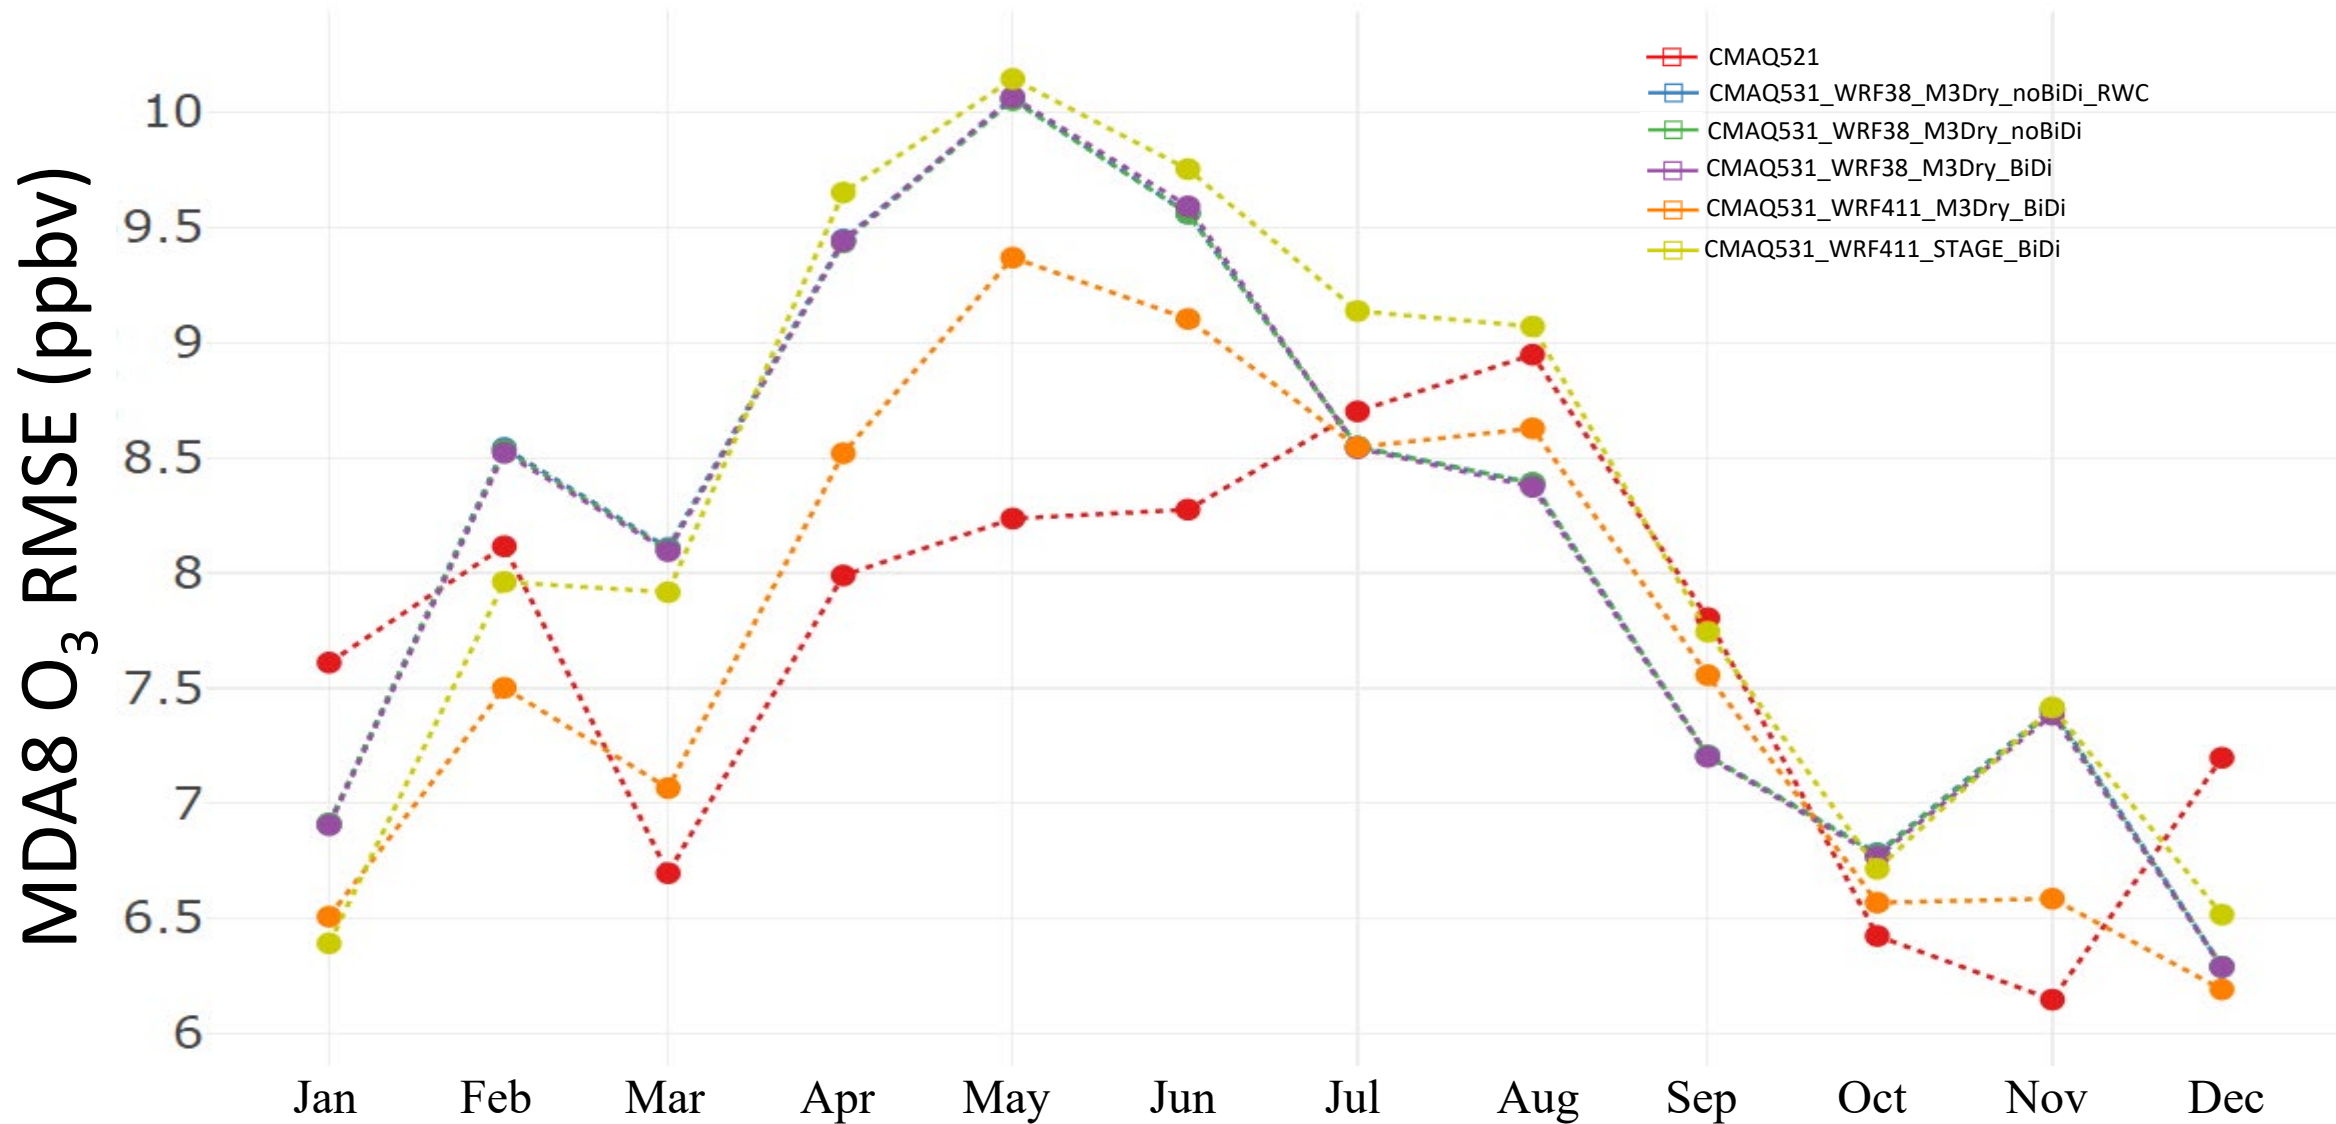

Figure S52. Time series of monthly average MDA8 O<sub>3</sub> RMSE (ppbv) for all AQS sites for CMAQ521 (red), CMAQ531\_WRF38\_M3Dry\_noBiDi\_RWC (blue), CMAQ531\_WRF38\_M3Dry\_noBiDi (green), CMAQ531\_WRF38\_M3Dry\_BiDi (purple), CMAQ531\_WRF411\_M3Dry\_BiDi (orange), and CMAQ531\_WRF411\_STAGE\_BiDi (yellow).

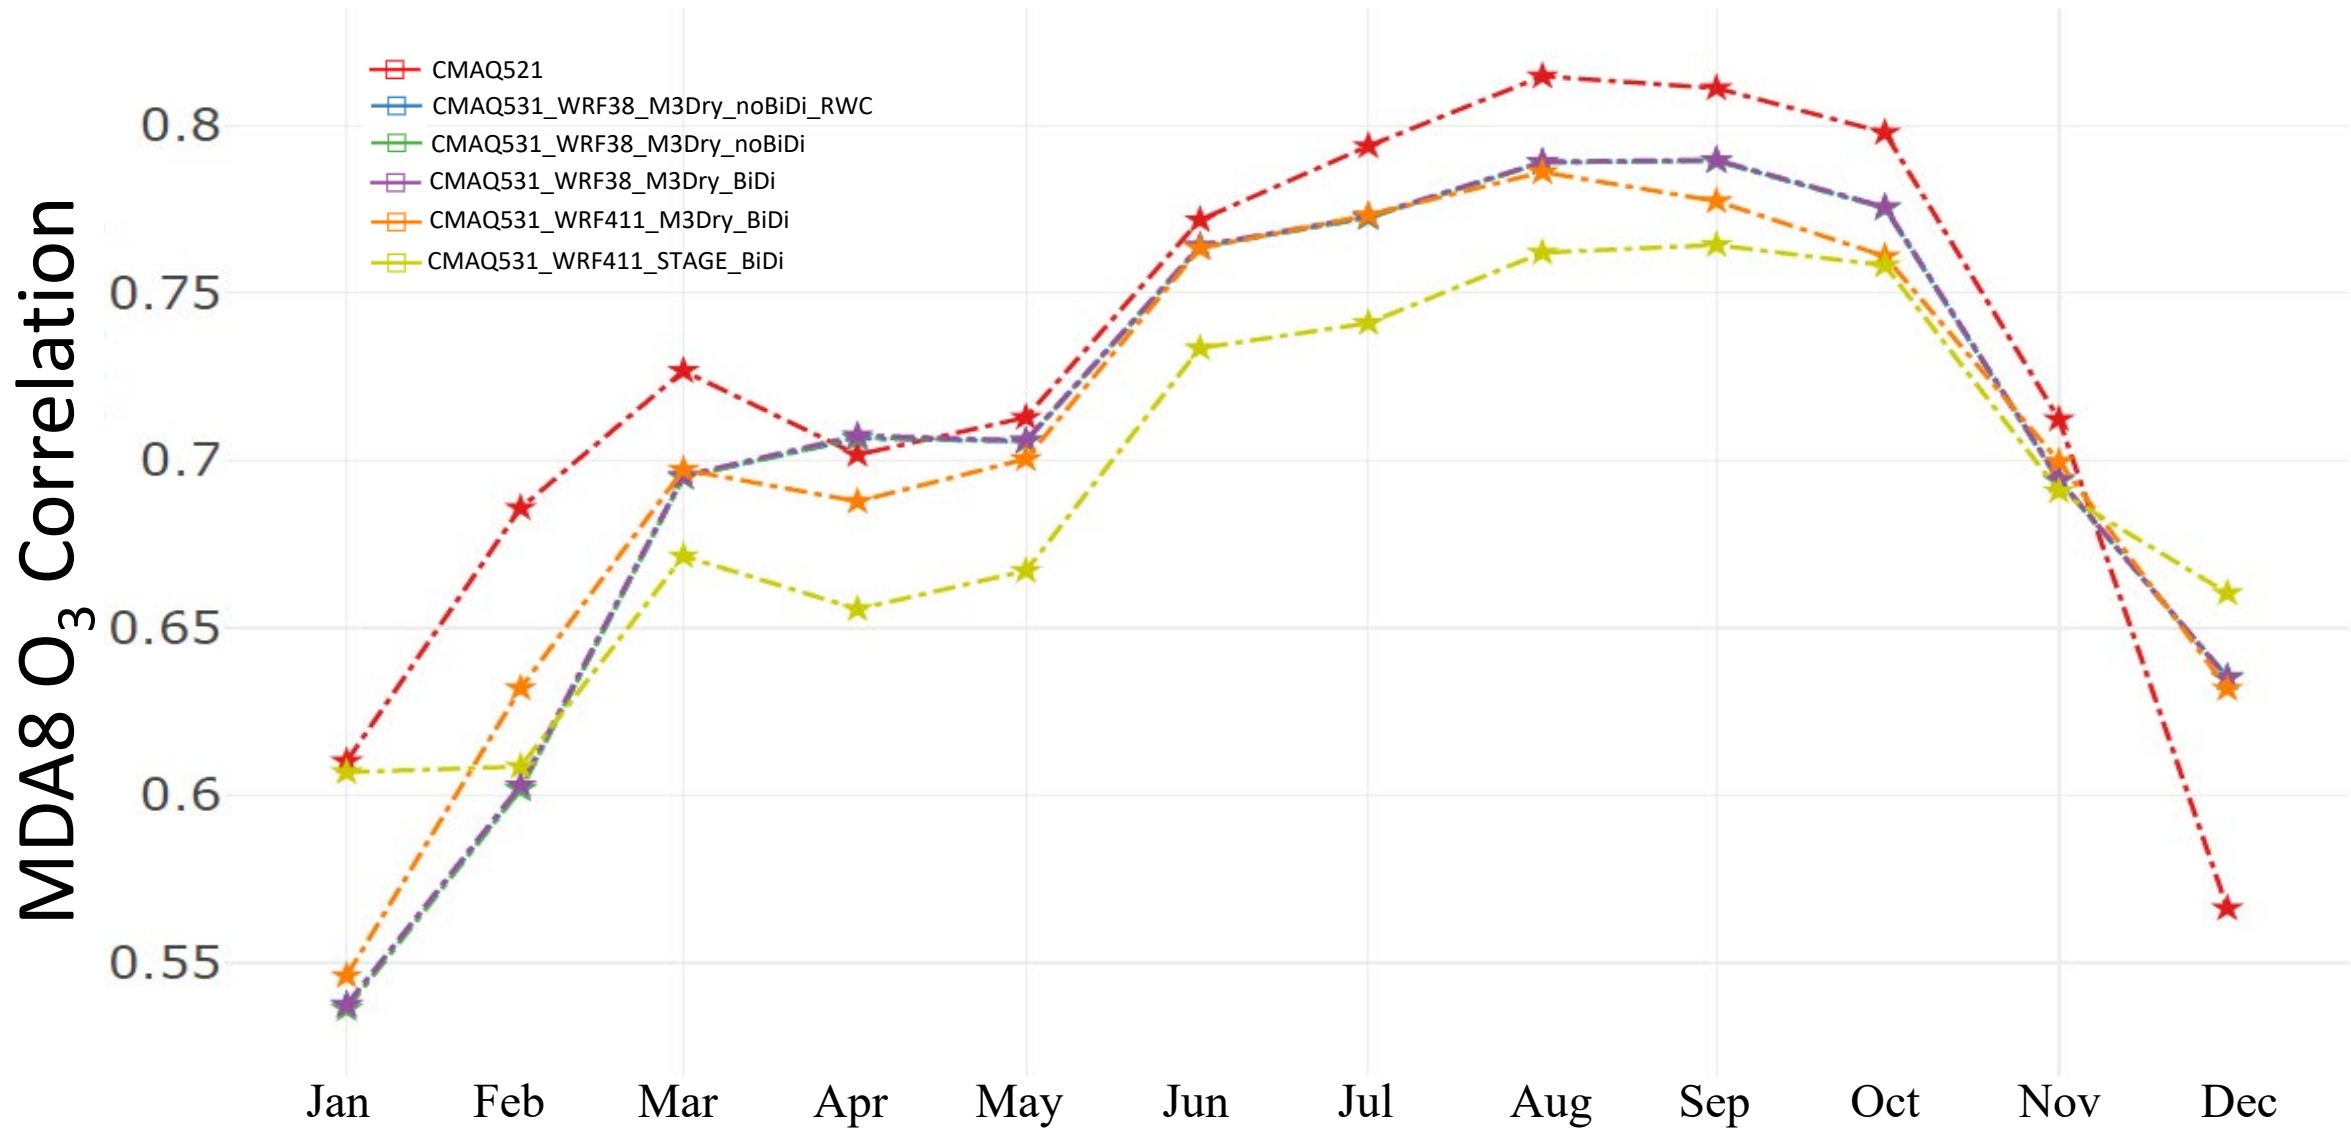

Figure S53. Time series of monthly average MDA8 O<sub>3</sub> Pearson correlation for all AQS sites for CMAQ521 (red), CMAQ531\_WRF38\_M3Dry\_noBiDi\_RWC (blue), CMAQ531\_WRF38\_M3Dry\_noBiDi (green), CMAQ531\_WRF38\_M3Dry\_BiDi (purple), CMAQ531\_WRF411\_M3Dry\_BiDi (orange), and CMAQ531\_WRF411\_STAGE\_BiDi (yellow).



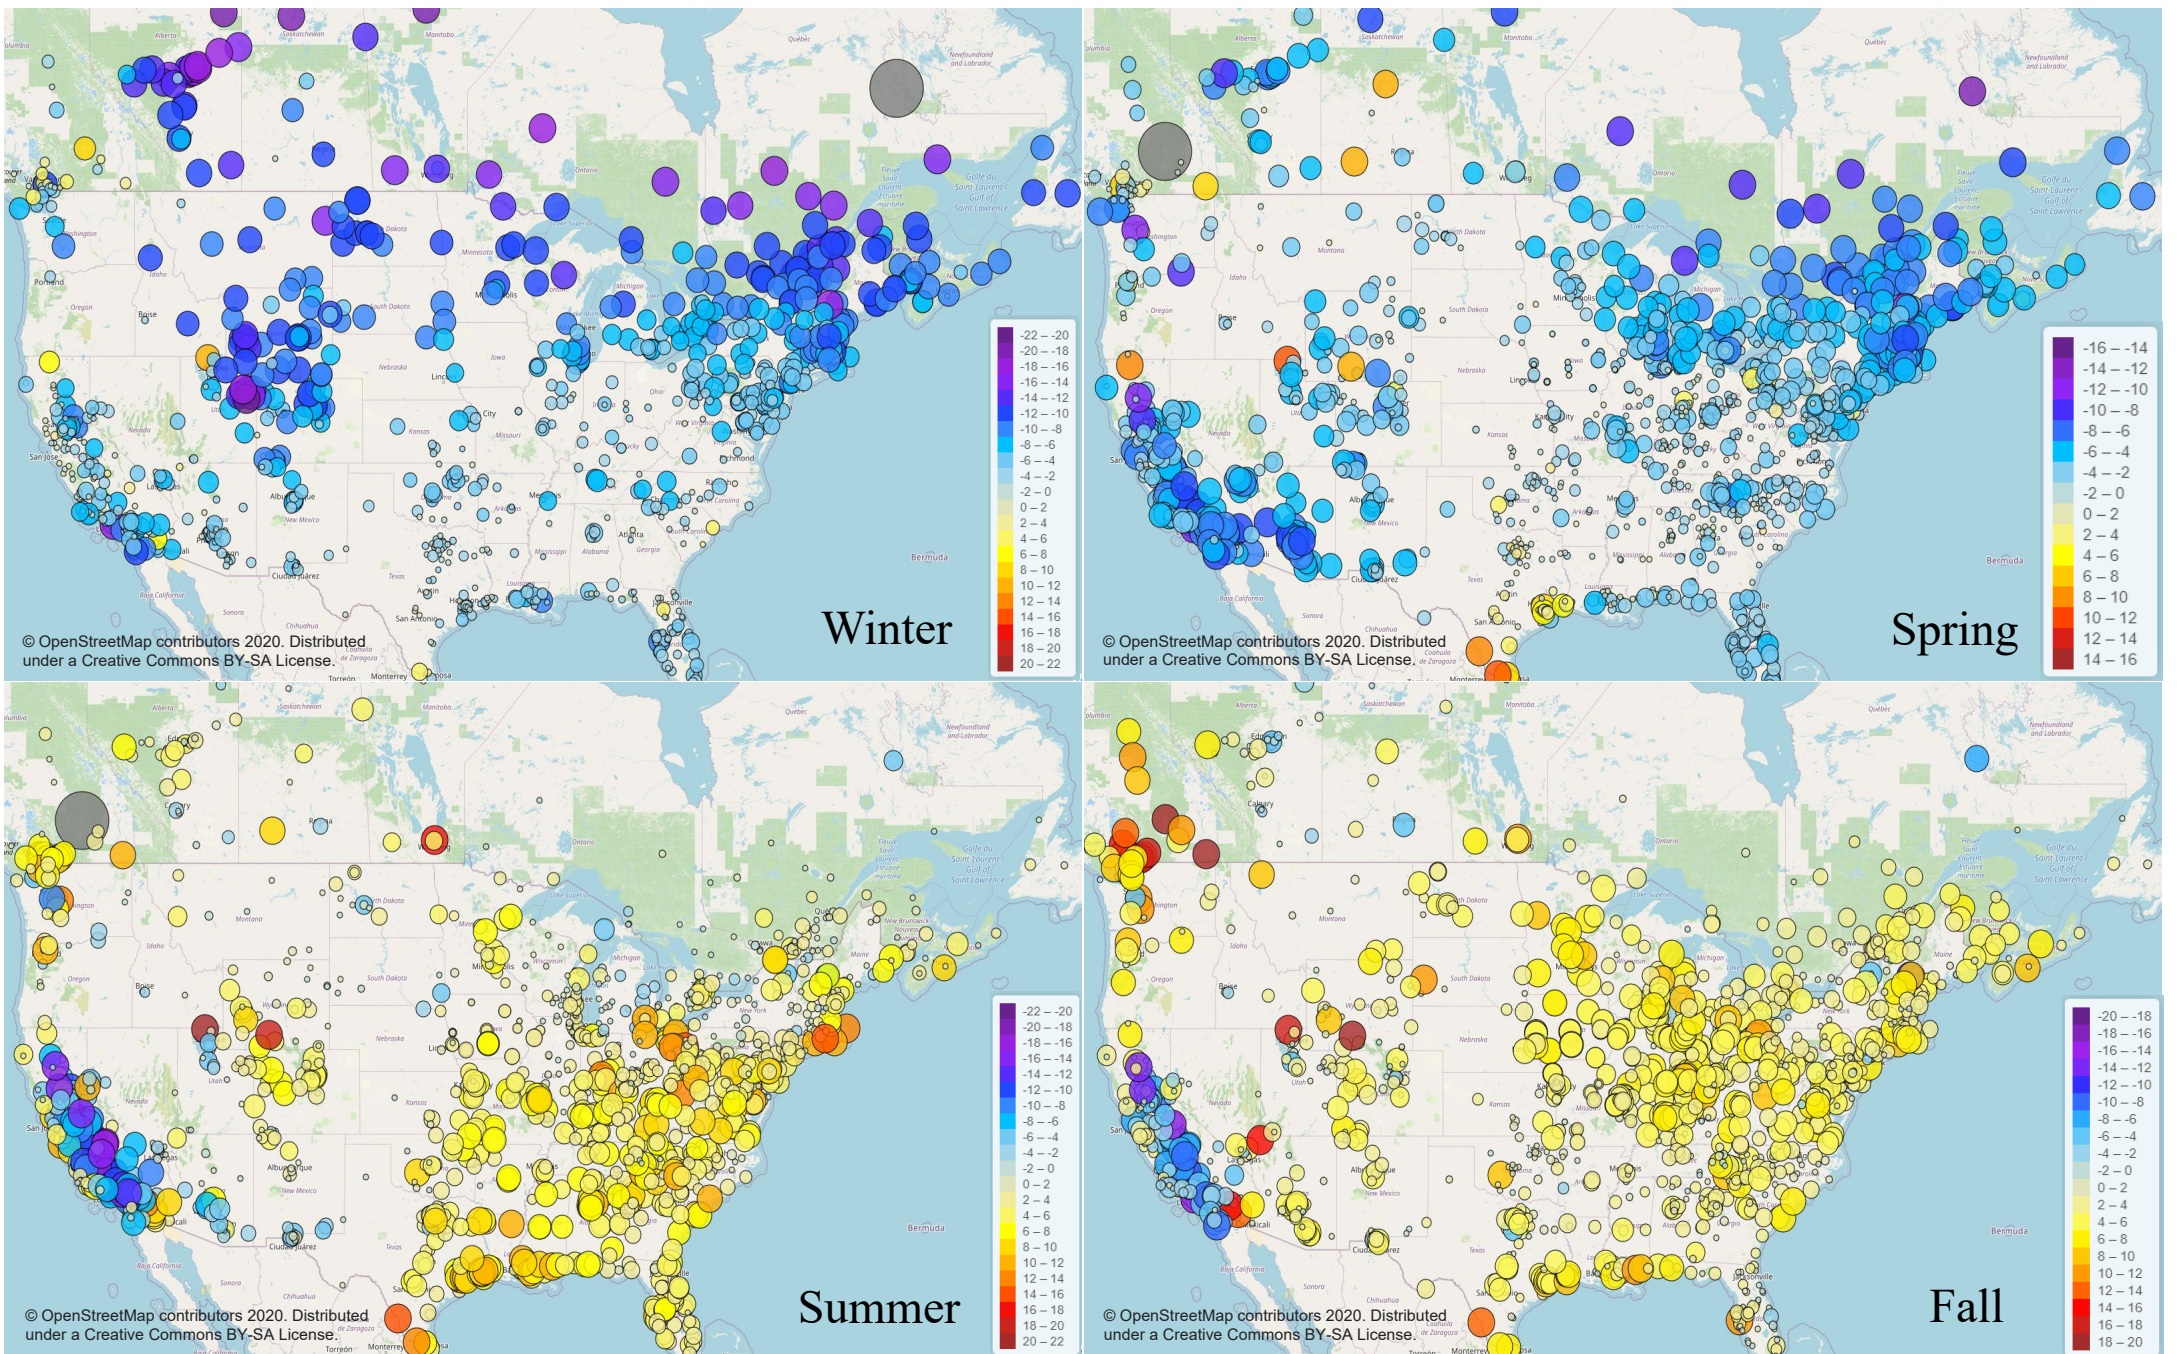

Figure S54. Seasonal average MDA8 O<sub>3</sub> bias (ppbv) for AQS and NAPS sites for the CMAQ521 simulation.



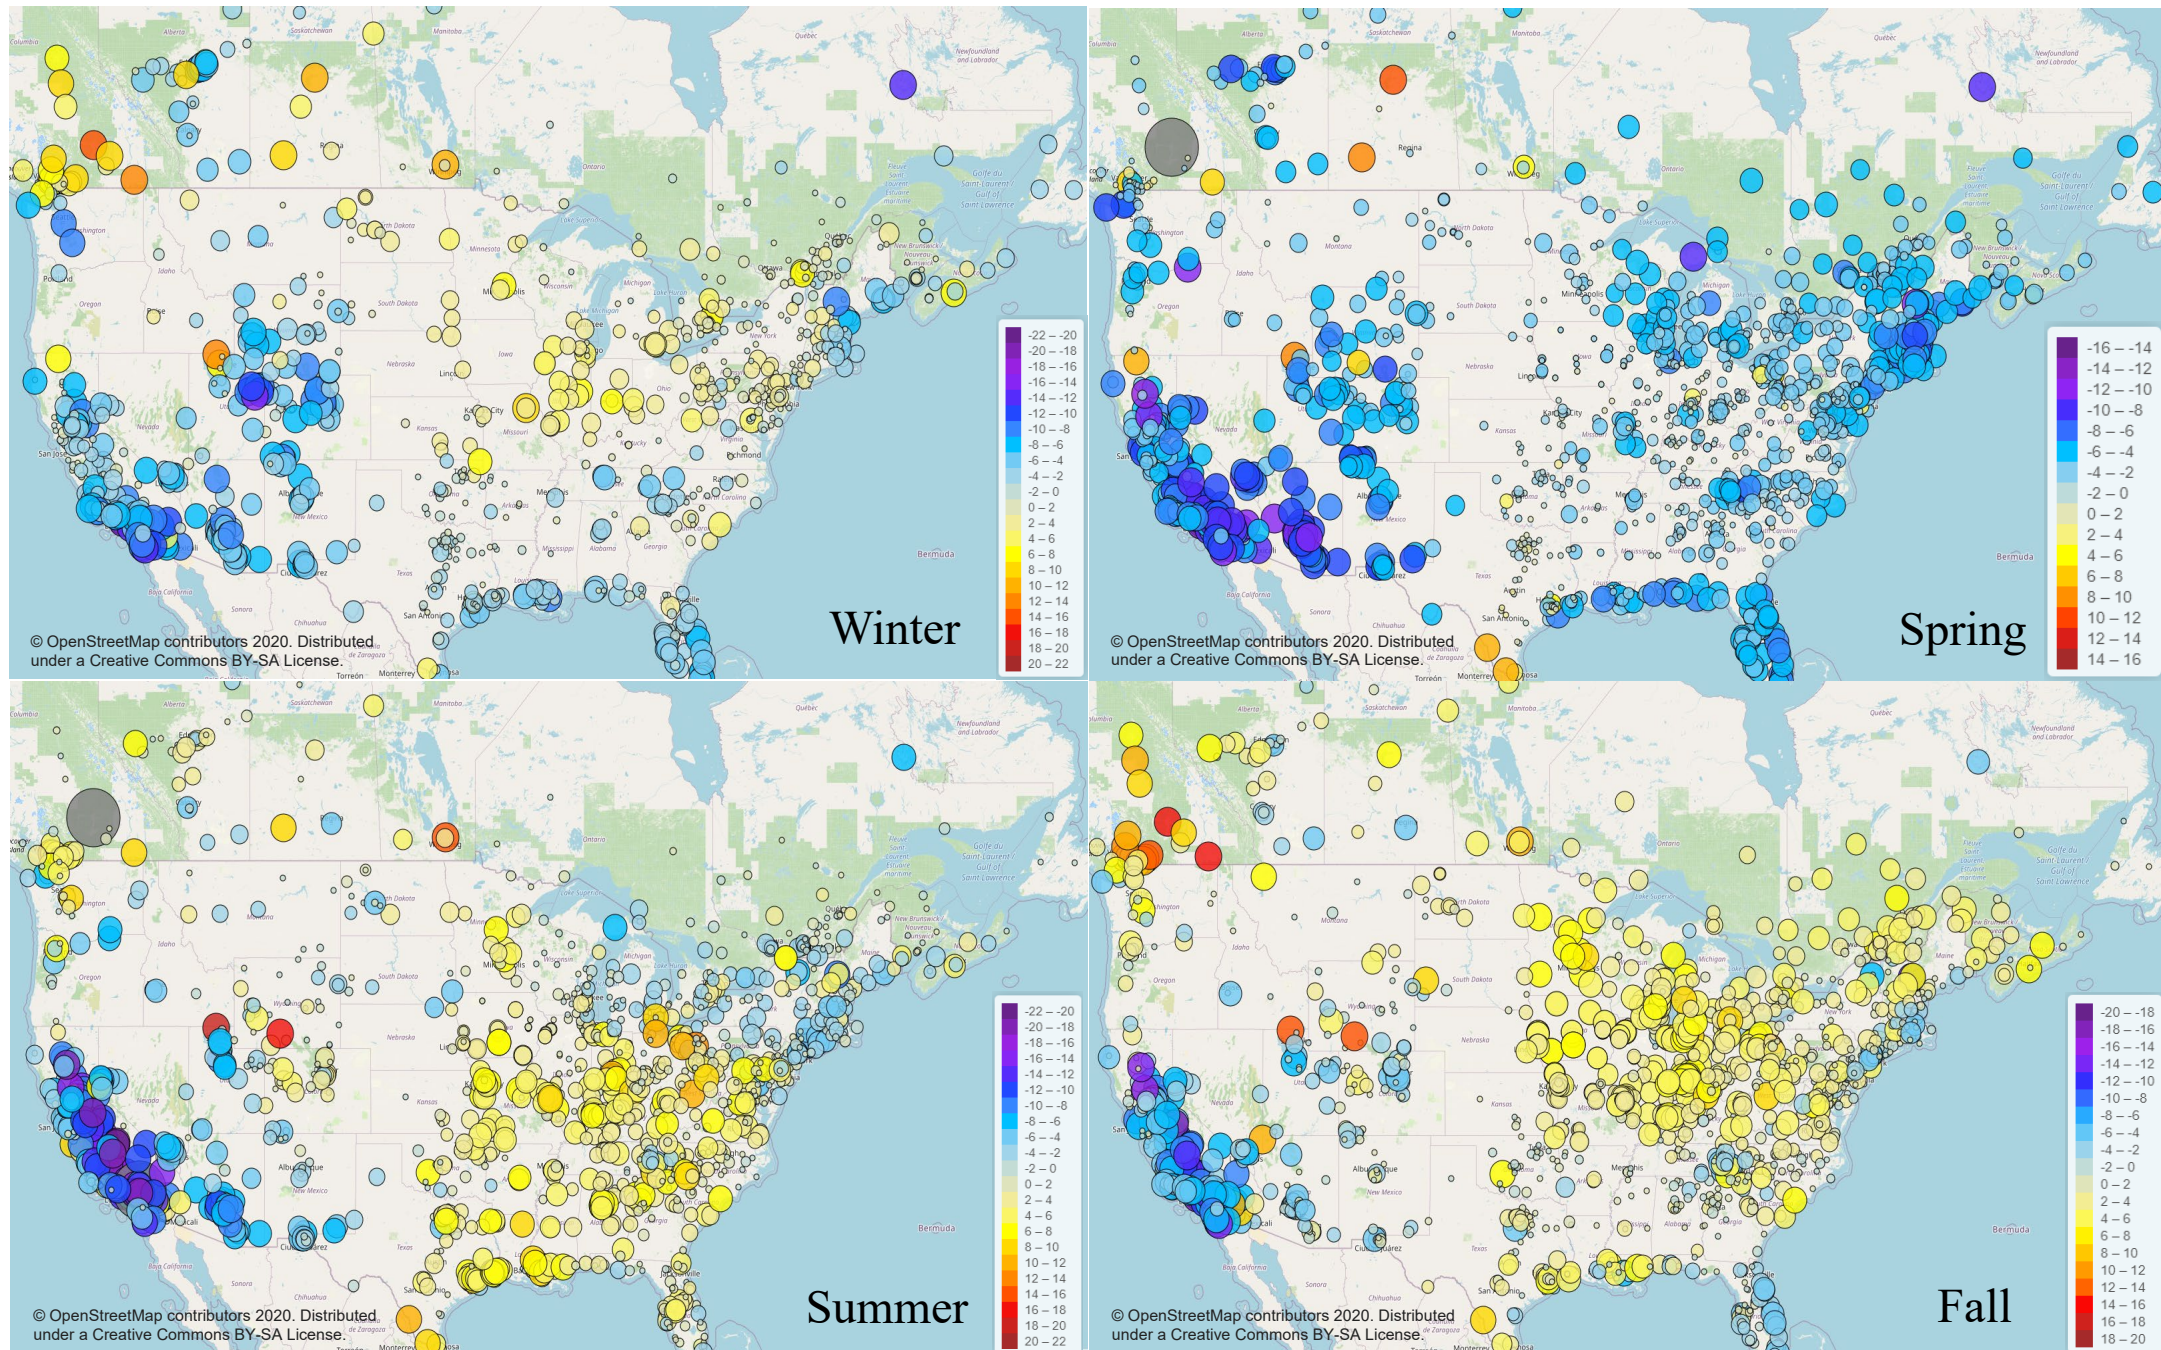

Figure S55. Seasonal average MDA8 O<sub>3</sub> bias (ppbv) for AQS and NAPS sites for the CMAQ531\_WRF411\_M3Dry\_BiDi simulation.



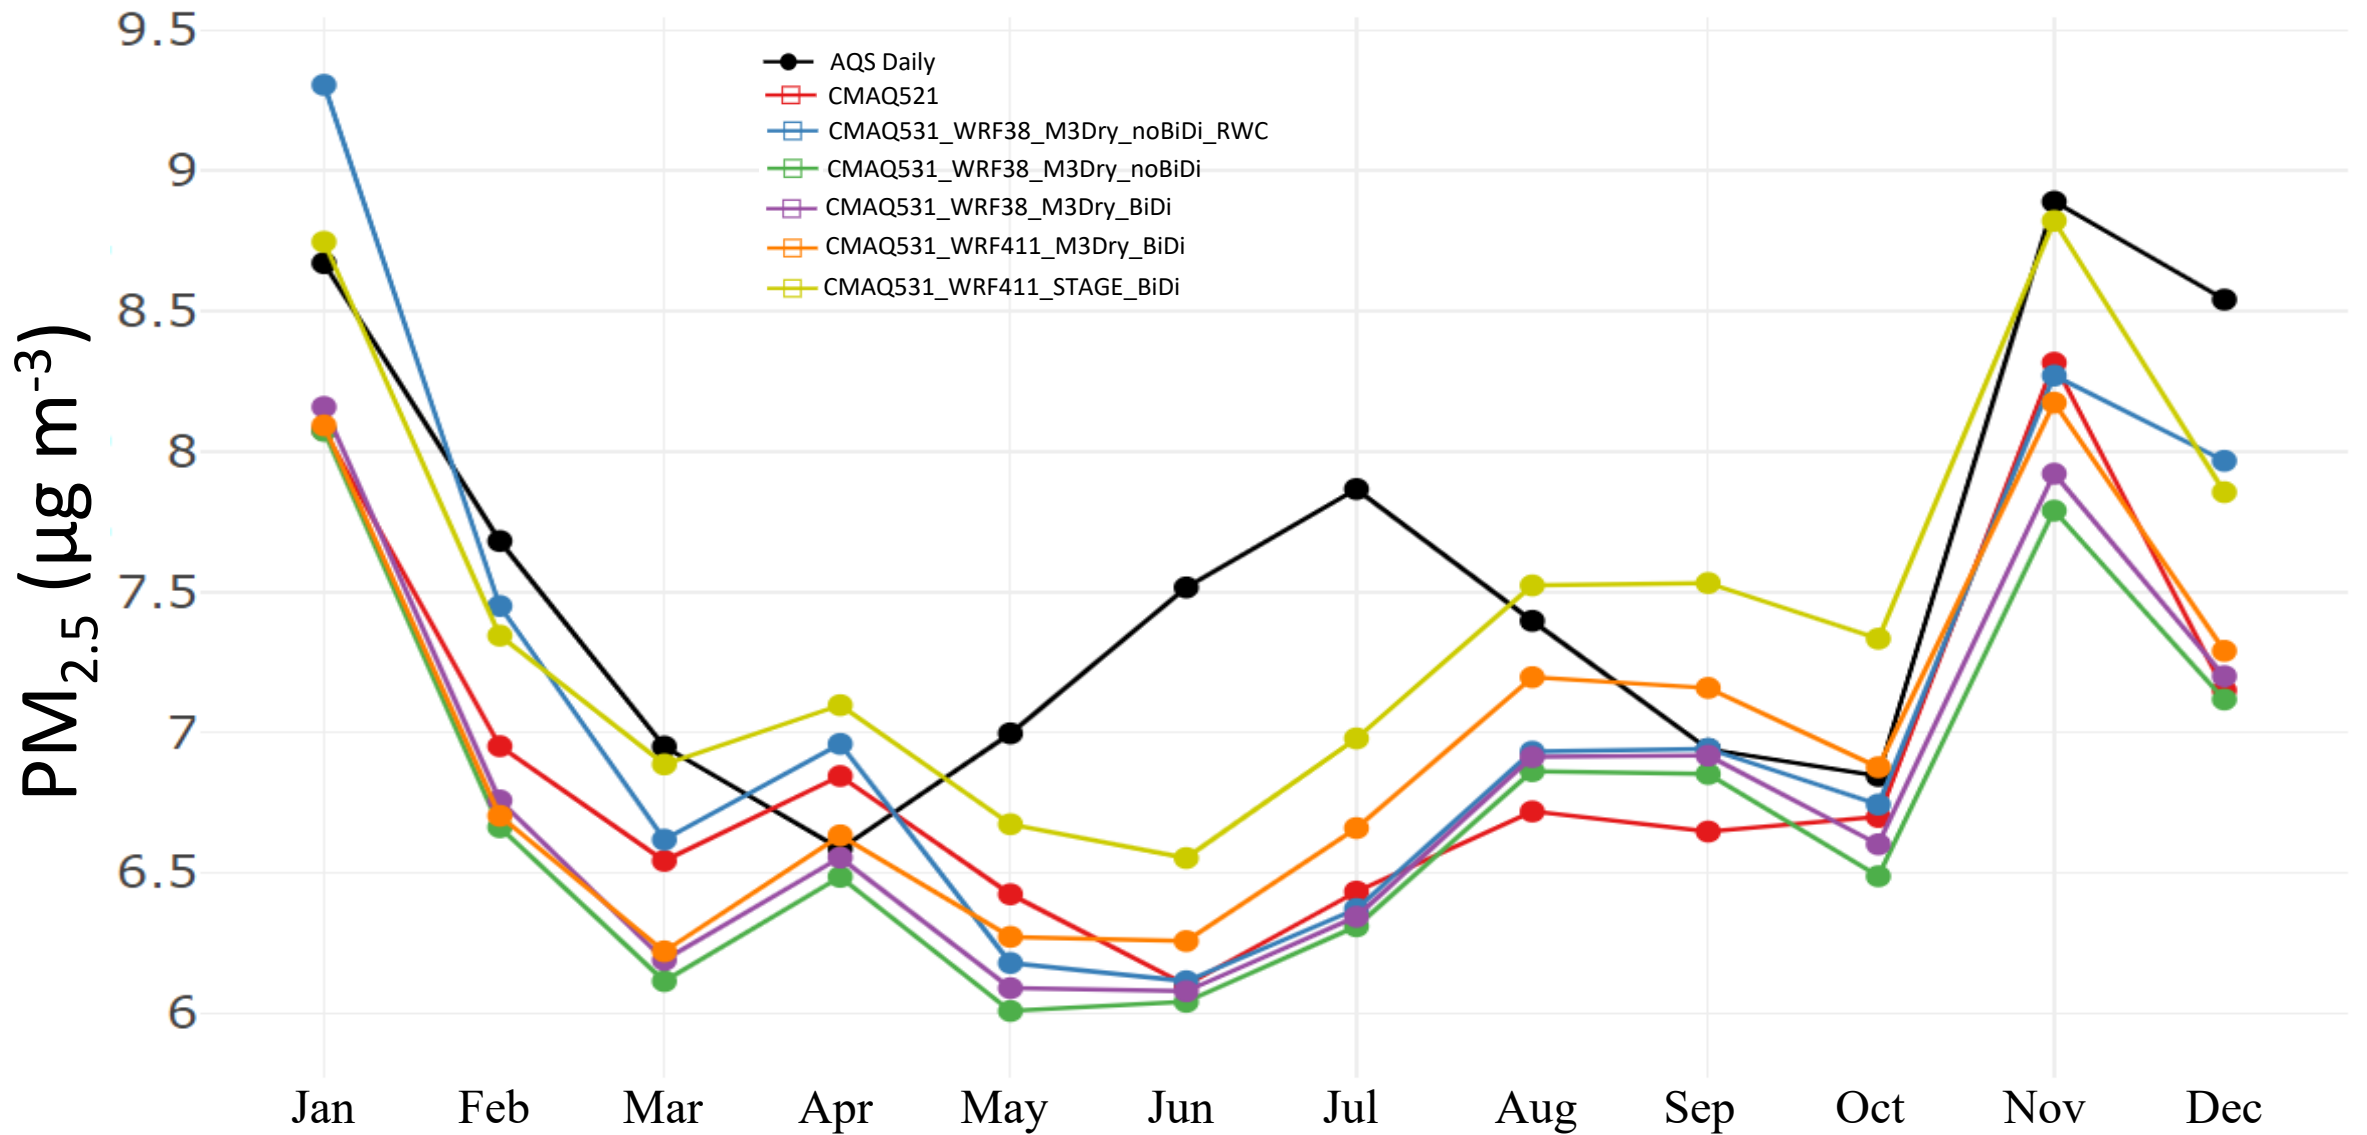

Figure S56. Time series of monthly average PM<sub>2.5</sub> (µg m<sup>-3</sup>) for all AQS sites (black), CMAQ521 (red), CMAQ531\_WRF38\_M3Dry\_noBiDi\_RWC (blue), CMAQ531\_WRF38\_M3Dry\_noBiDi (green), CMAQ531\_WRF38\_M3Dry\_BiDi (purple), CMAQ531\_WRF411\_M3Dry\_BiDi (orange), and CMAQ531\_WRF411\_STAGE\_BiDi (yellow).



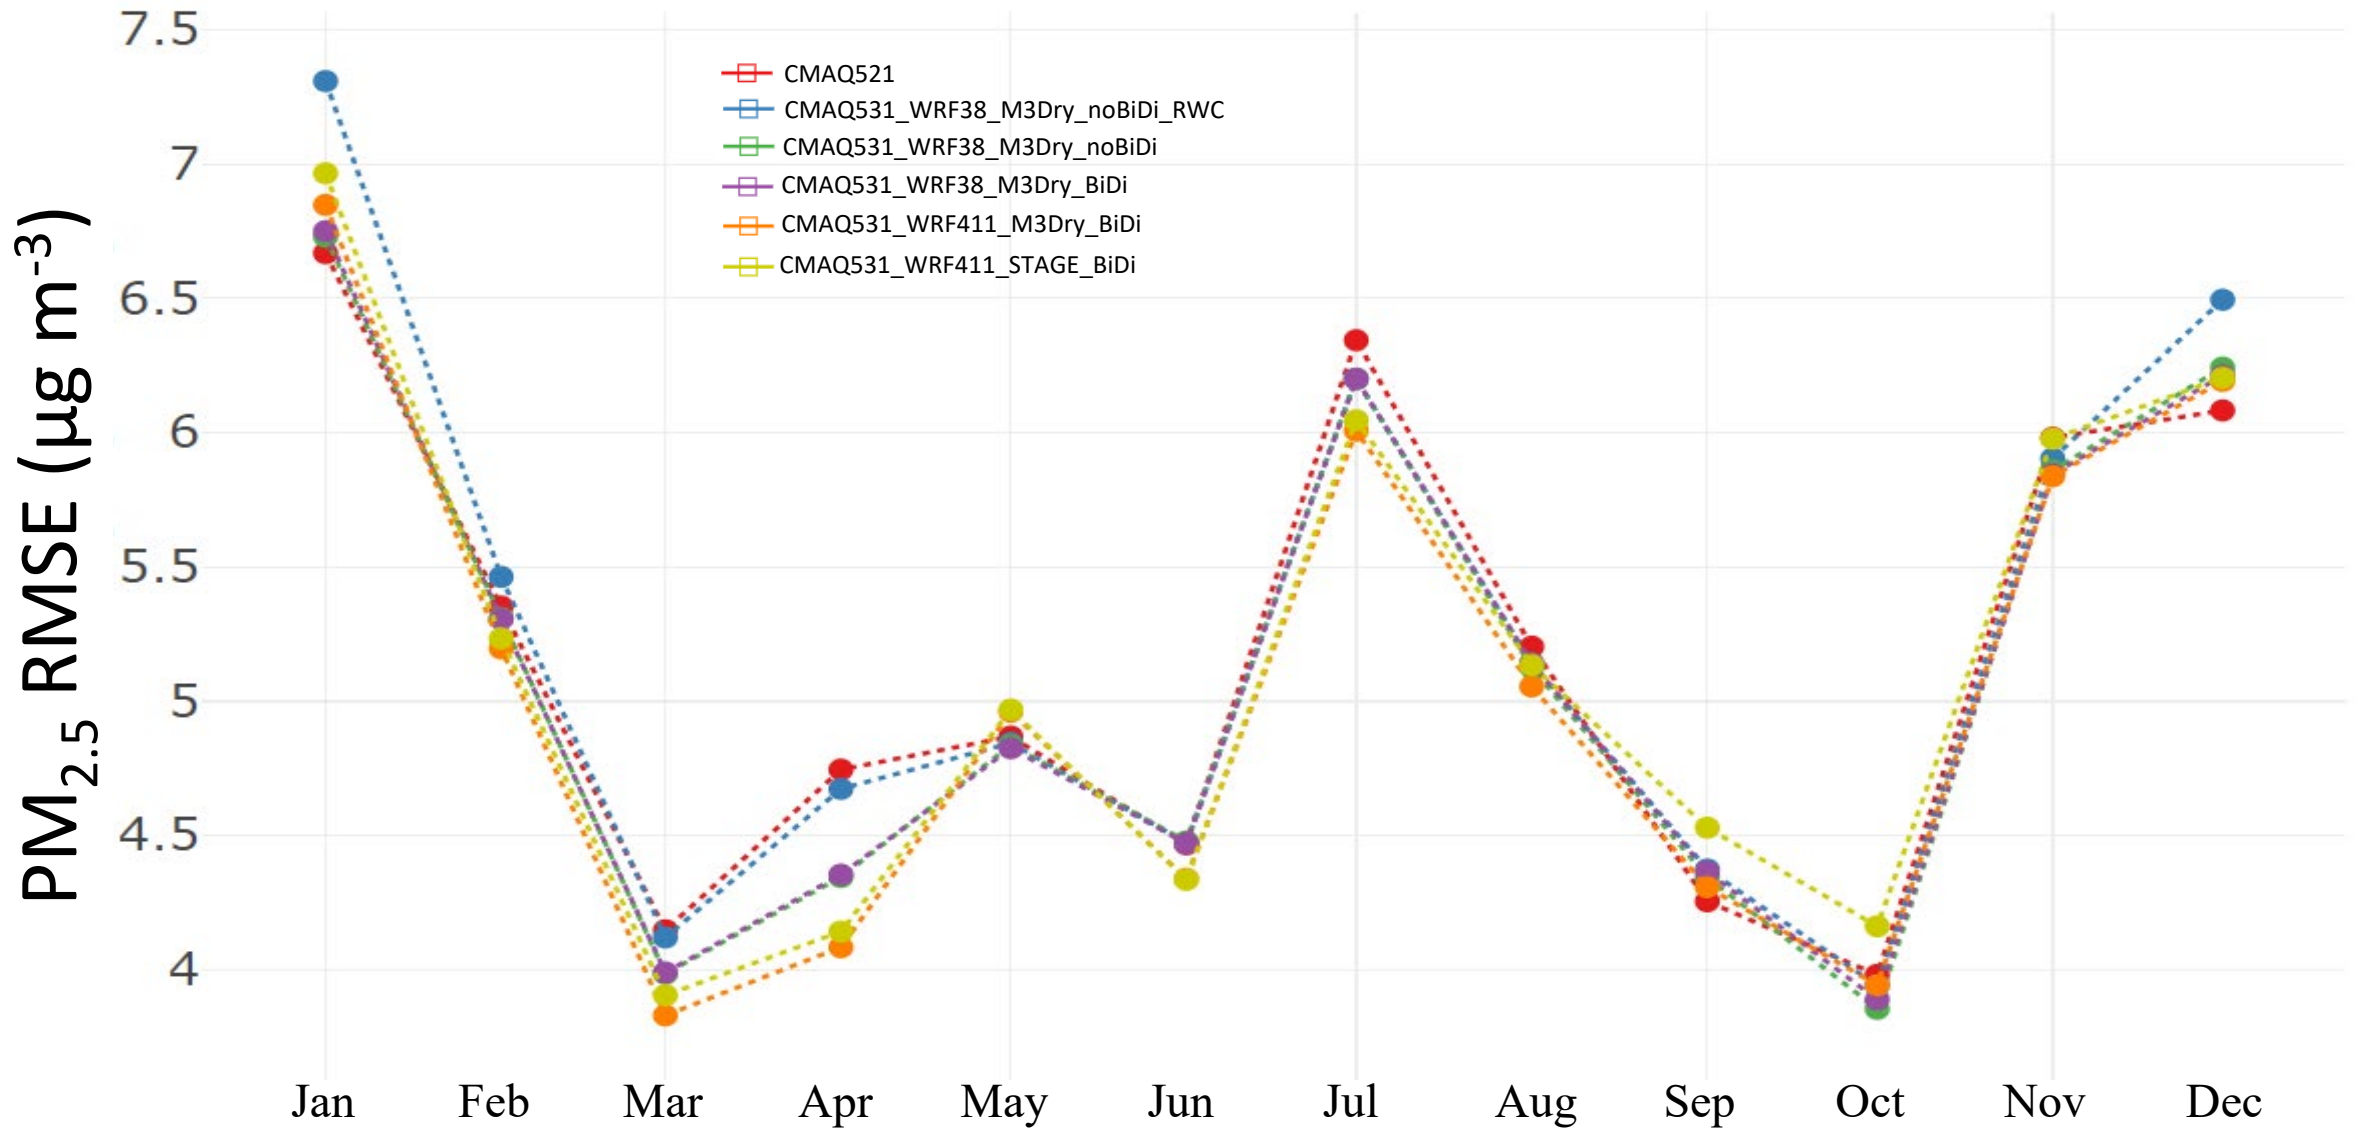

Figure S57. Time series of monthly average PM<sub>2.5</sub> RMSE (µg m<sup>-3</sup>) for all AQS sites for CMAQ521 (red), CMAQ531\_WRF38\_M3Dry\_noBiDi\_RWC (blue), CMAQ531\_WRF38\_M3Dry\_noBiDi (green), CMAQ531\_WRF38\_M3Dry\_BiDi (purple), CMAQ531\_WRF411\_M3Dry\_BiDi (orange), and CMAQ531\_WRF411\_STAGE\_BiDi (yellow).

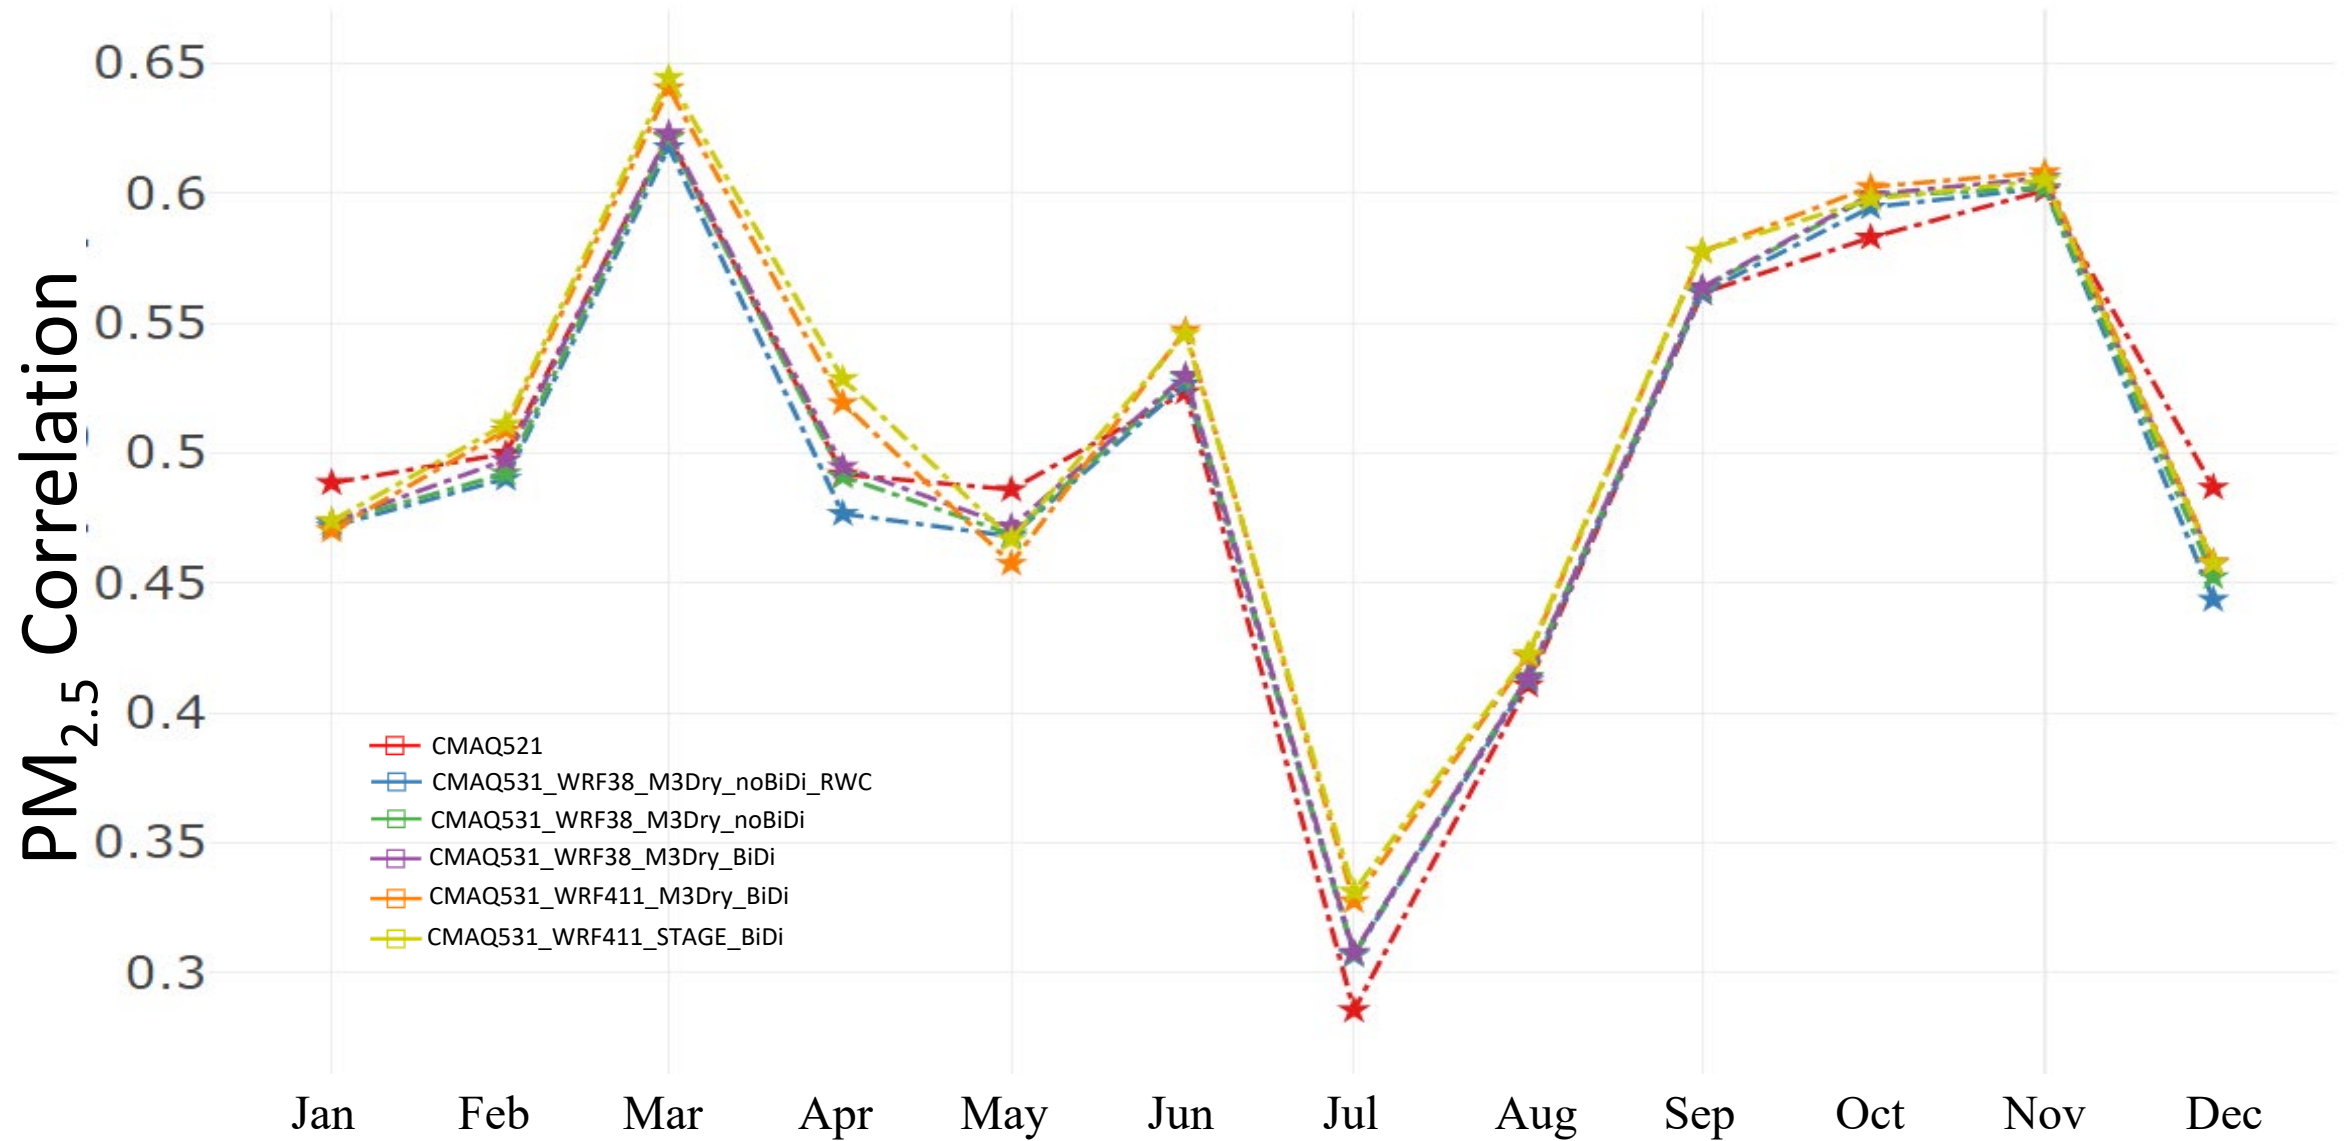

Figure S58. Time series of monthly average PM<sub>2.5</sub> Pearson correlation for all AQS sites for CMAQ521 (red), CMAQ531\_WRF38\_M3Dry\_noBiDi\_RWC (blue), CMAQ531\_WRF38\_M3Dry\_noBiDi (green), CMAQ531\_WRF38\_M3Dry\_BiDi (purple), CMAQ531\_WRF411\_M3Dry\_BiDi (orange), and CMAQ531\_WRF411\_STAGE\_BiDi (yellow).



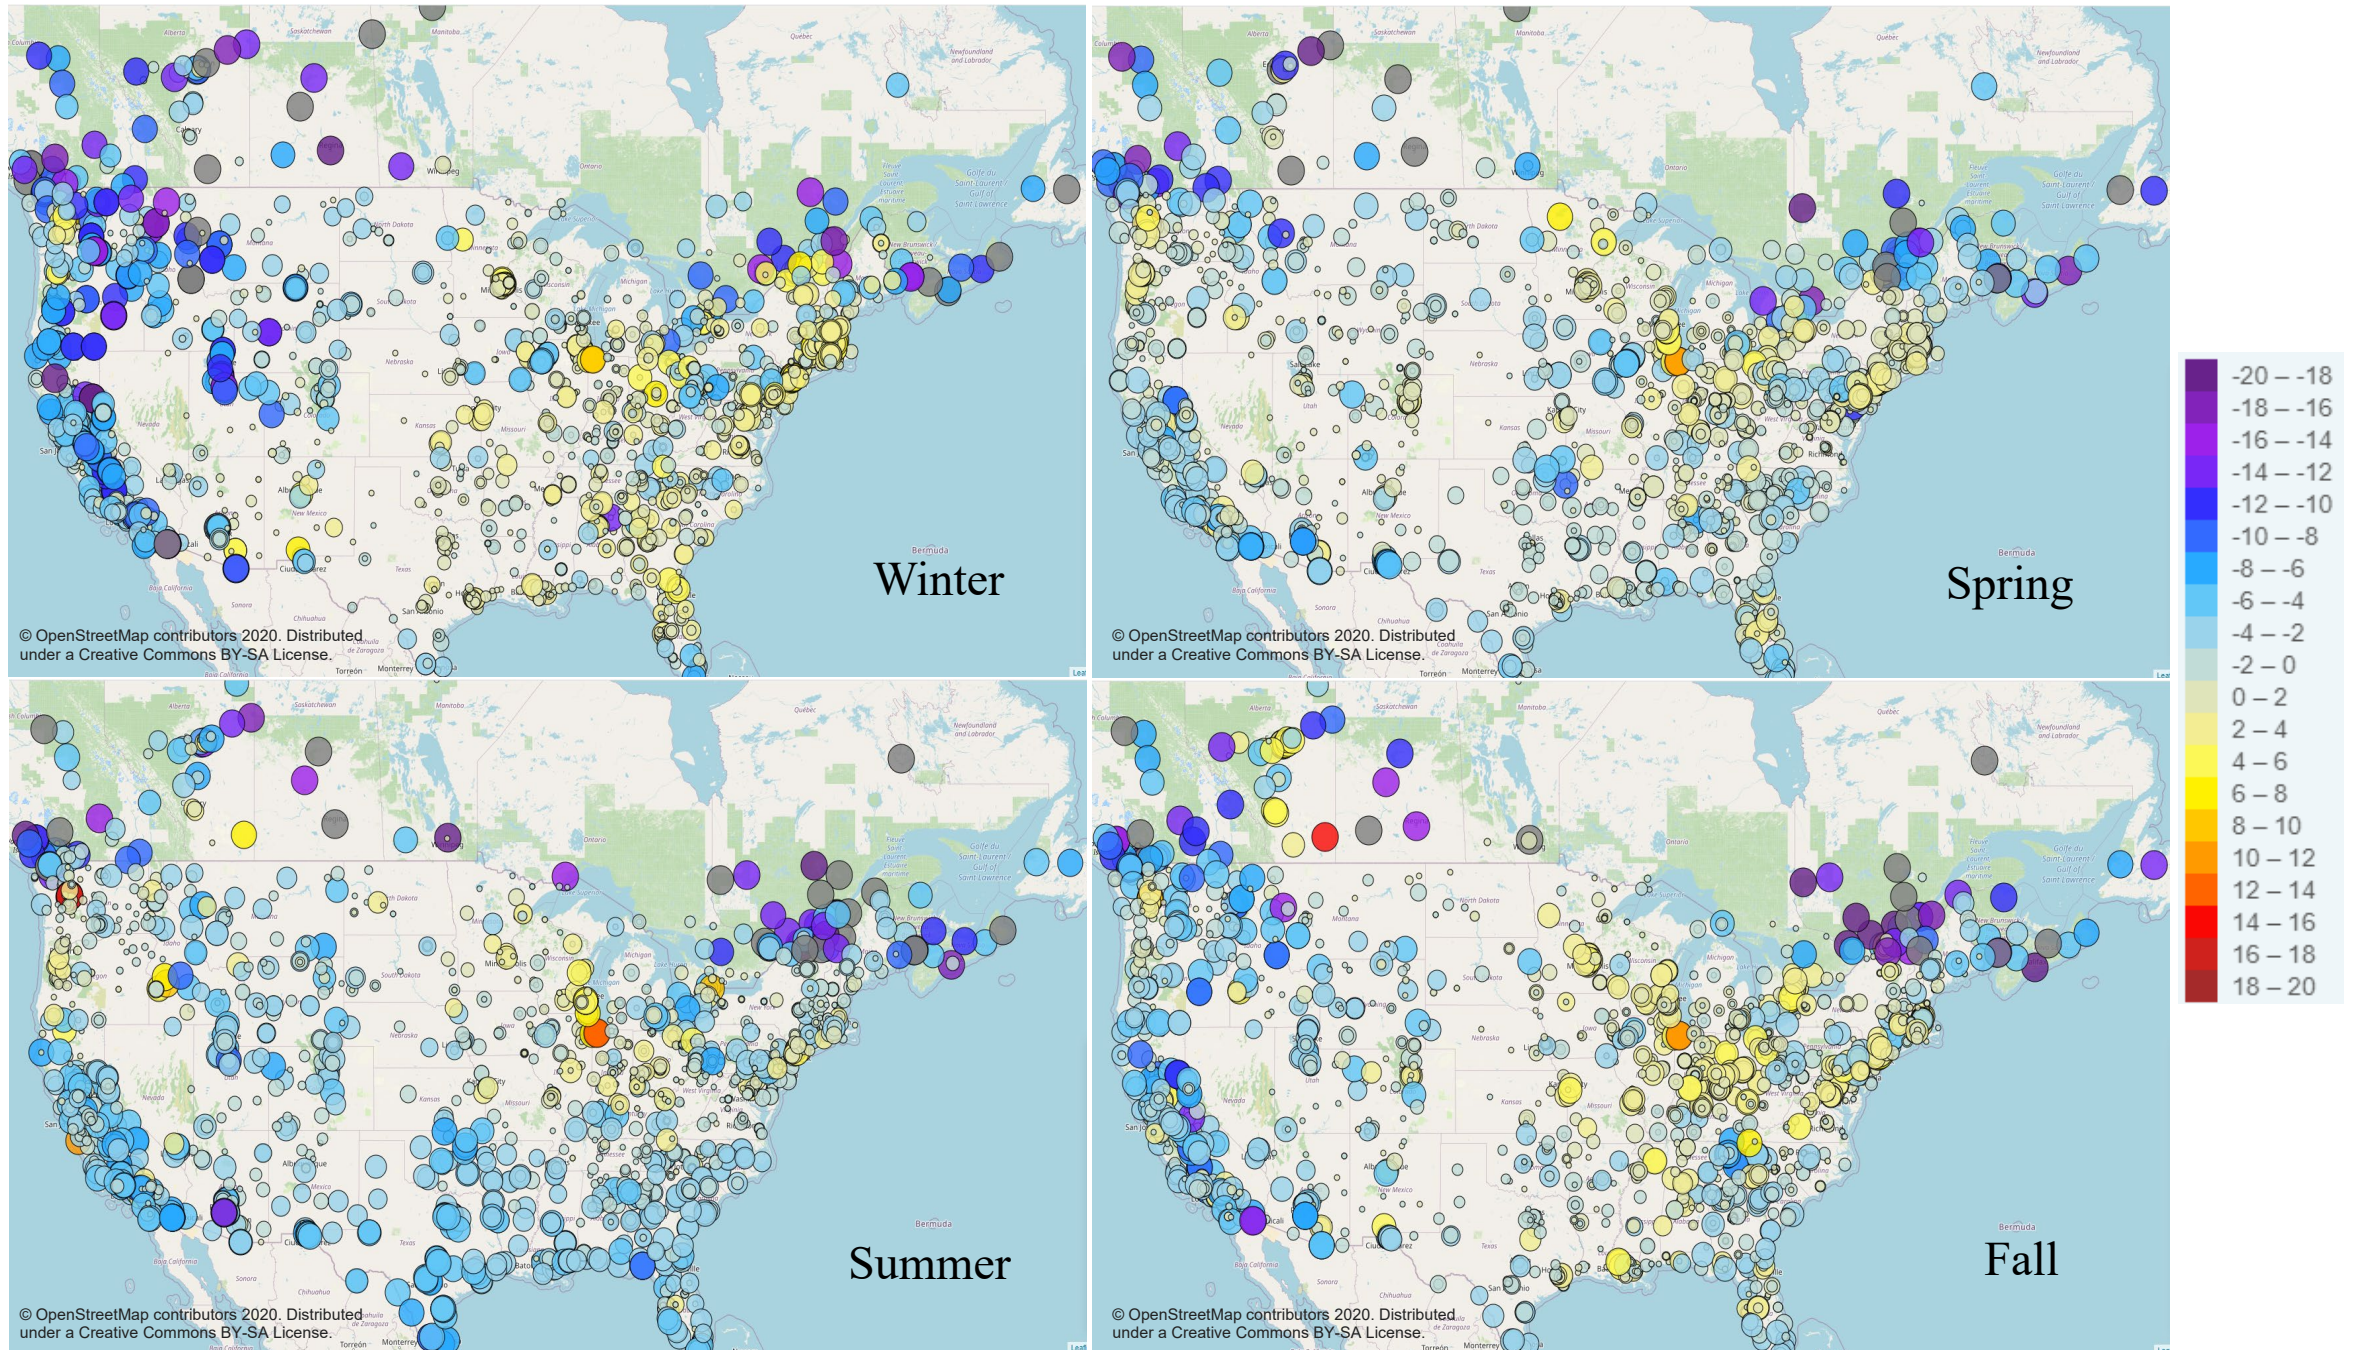

Figure S59. Seasonal average PM<sub>2.5</sub> bias ( $\mu\text{g m}^{-3}$ ) for AQSNAPS sites for the CMAQ521 simulation. The symbol size is commensurate with the absolute value of the bias. Gray symbols indicate values outside the color scale (i.e. outliers).



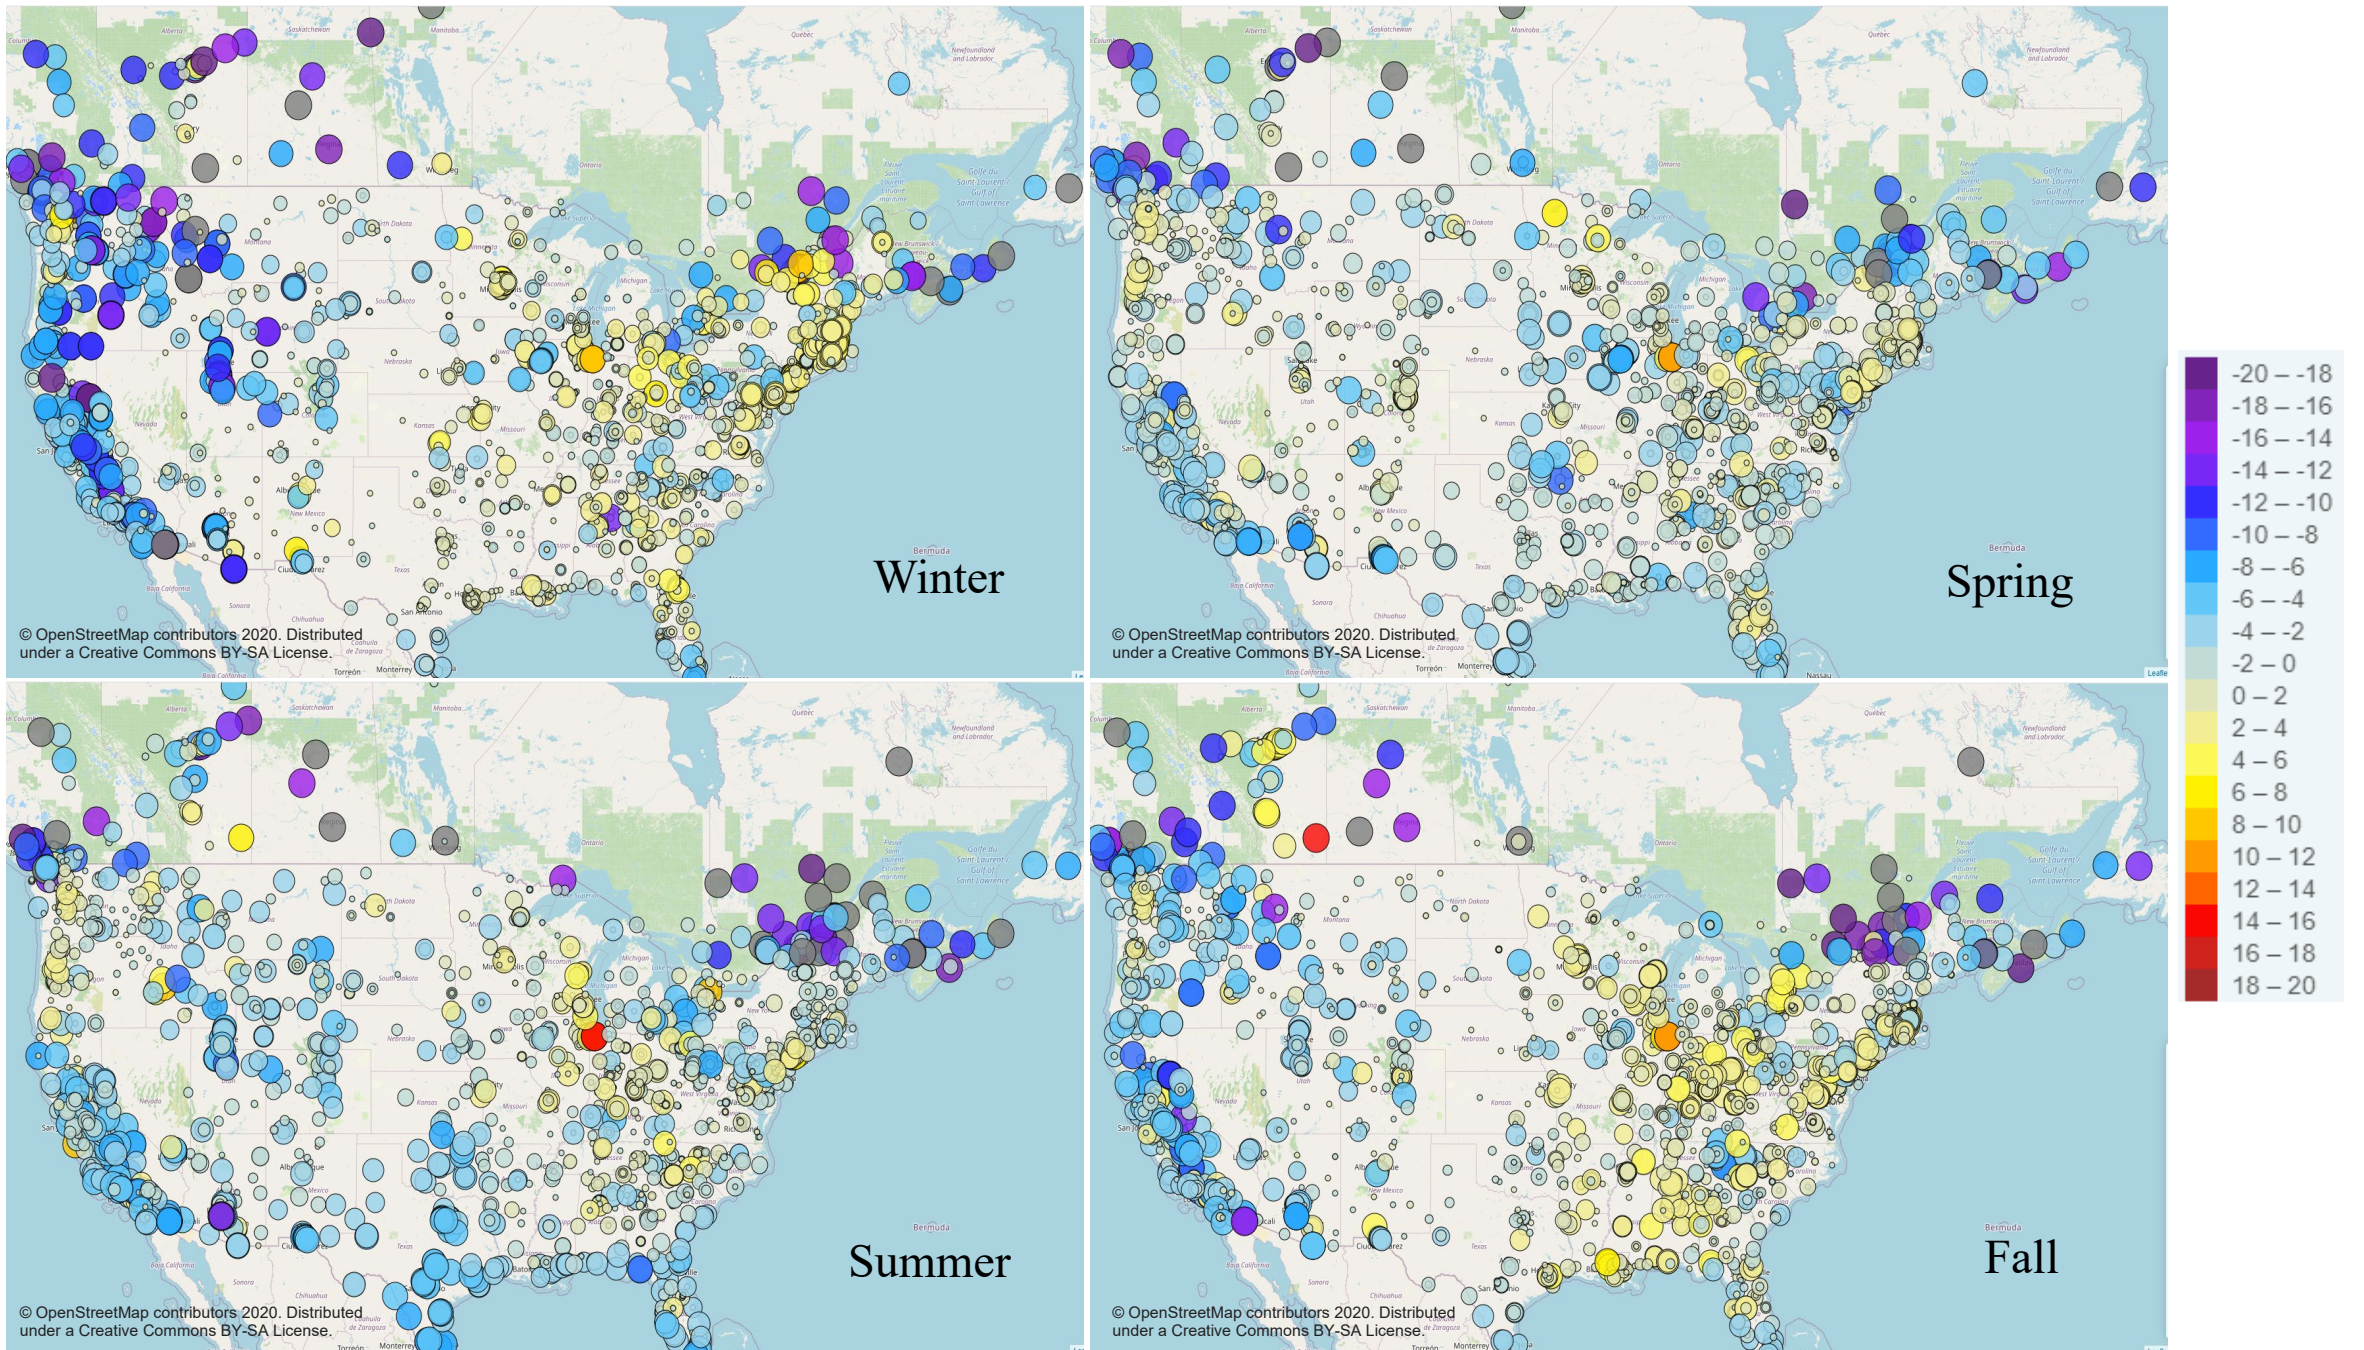

Figure S60. Seasonal average PM<sub>2.5</sub> bias ( $\mu\text{g m}^{-3}$ ) for AQS and NAPS sites for the CMAQ531\_WRF411\_M3Dry\_BiDi simulation. The symbol size is commensurate with the absolute value of the bias. Gray symbols indicate values outside the color scale (i.e. outliers).



2016 WRFv411CMAQv531 vs. WRFv38CMAQv531 Seasonal Mean,VD\_O 2016 WRFv411CMAQv531 vs. WRFv38CMAQv531 Seasonal Mean,O3

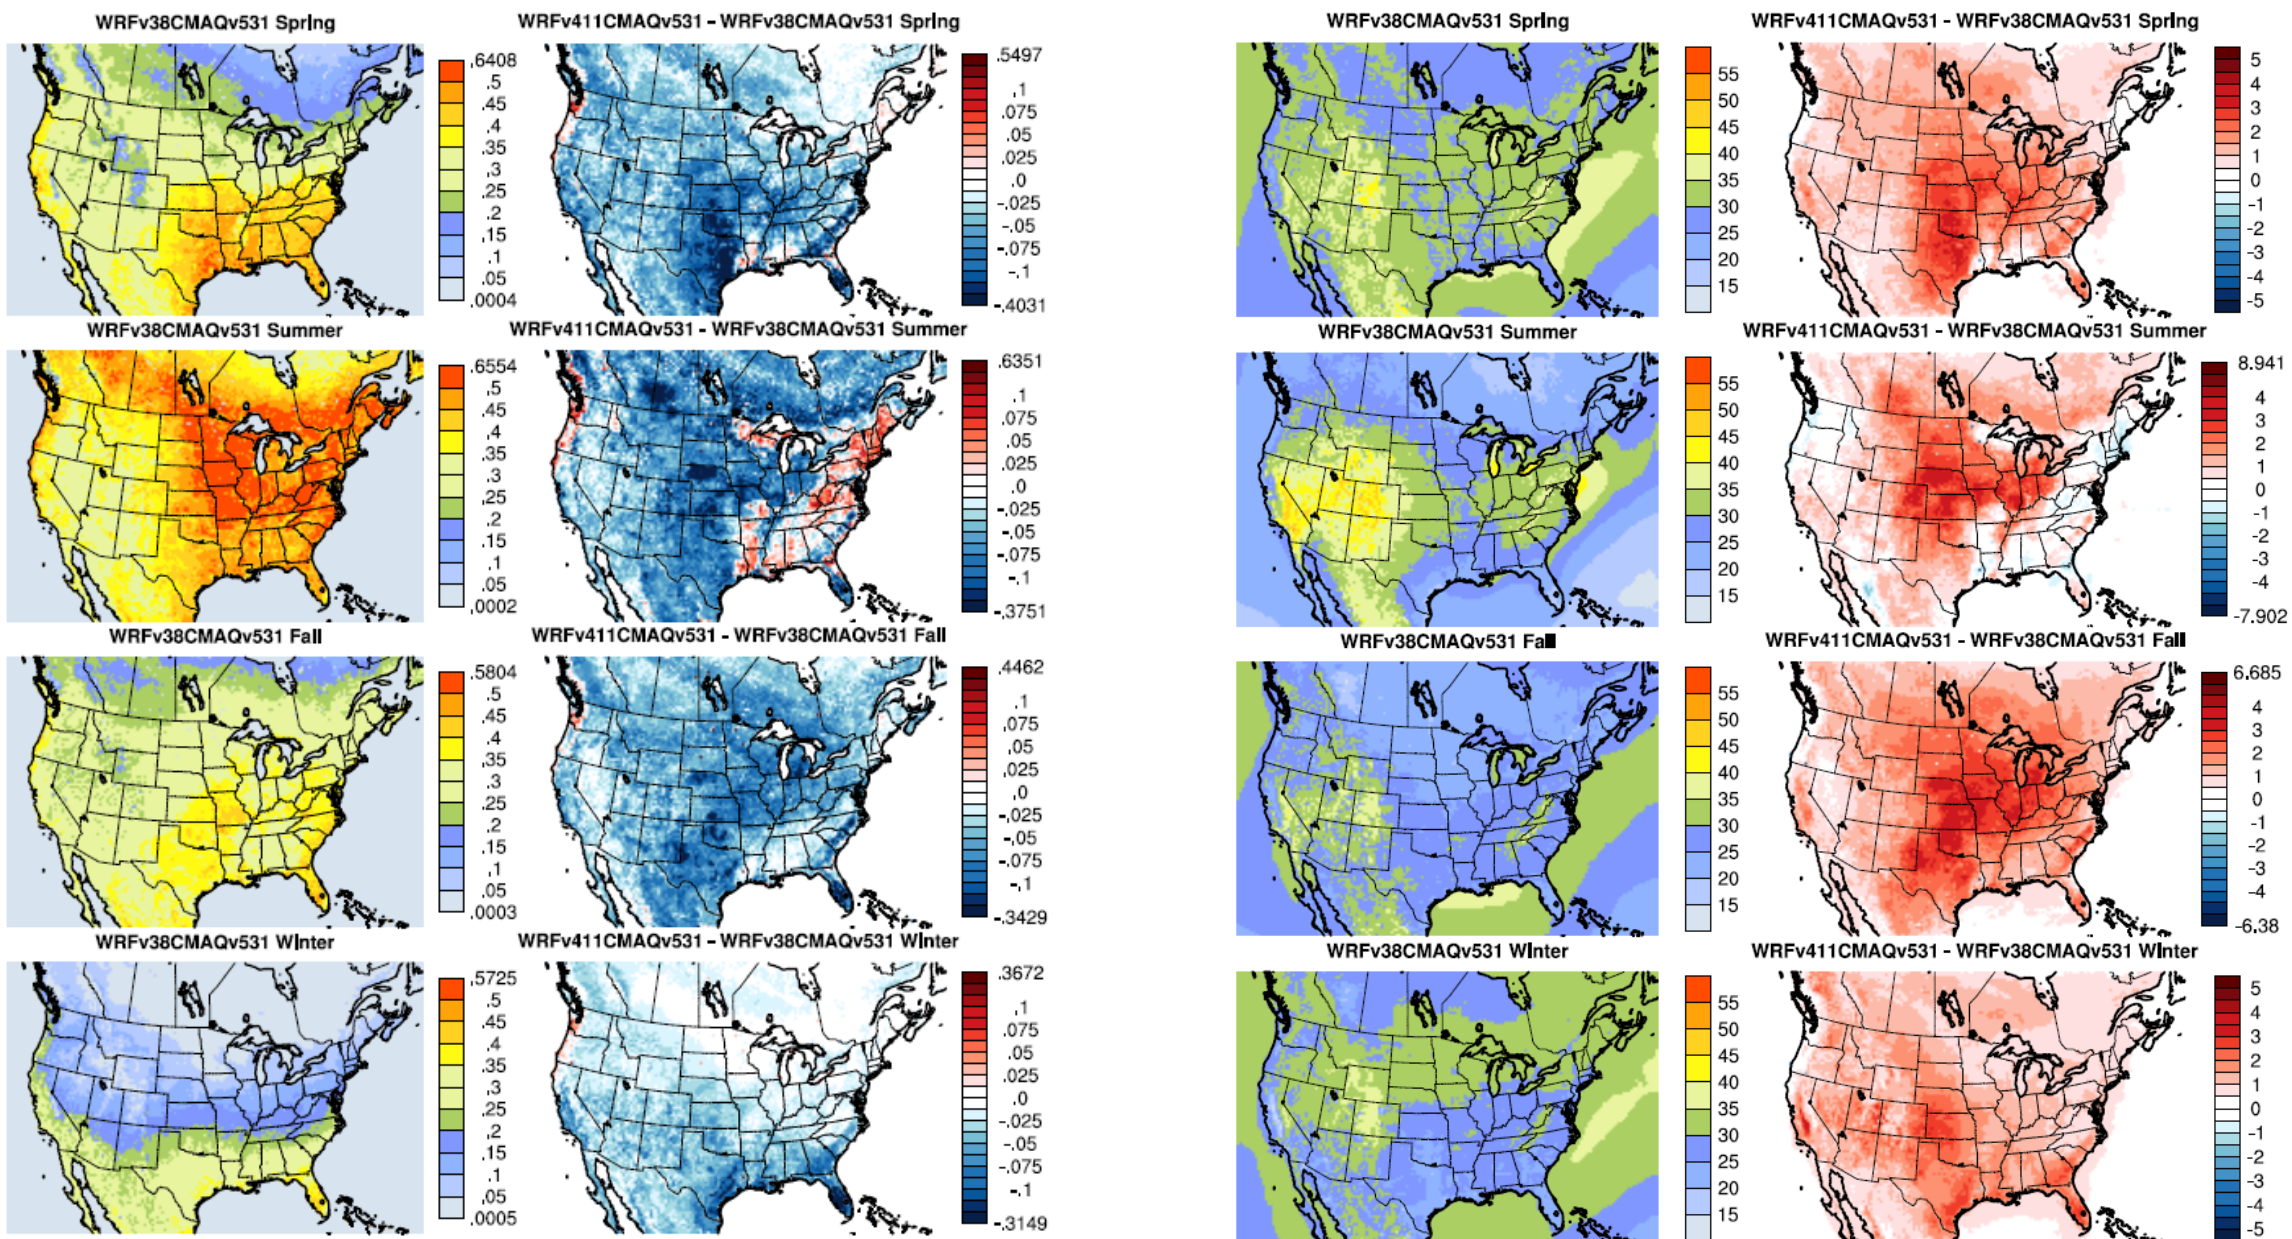

Figure S61. Seasonal O<sub>3</sub> deposition velocity (VD\_O<sub>3</sub>; cm s<sup>-1</sup>; left) and O<sub>3</sub> mixing ratio (ppbv; right) for the CMAQ531\_WRF38\_M3Dry\_BiDi simulation along with the difference in VD\_O<sub>3</sub> and mixing ratio between the CMAQ531\_WRF38\_M3Dry\_BiDi and CMAQ531\_WRF411\_M3Dry\_BiDi simulations (WRF411 – WRF38).



2016 WRFv411CMAQv531 vs. WRFv38CMAQv531 Seasonal Mean, VMASSJ 2016 WRFv411CMAQv531 vs. WRFv38CMAQv531 Seasonal Mean, ATOTIJ

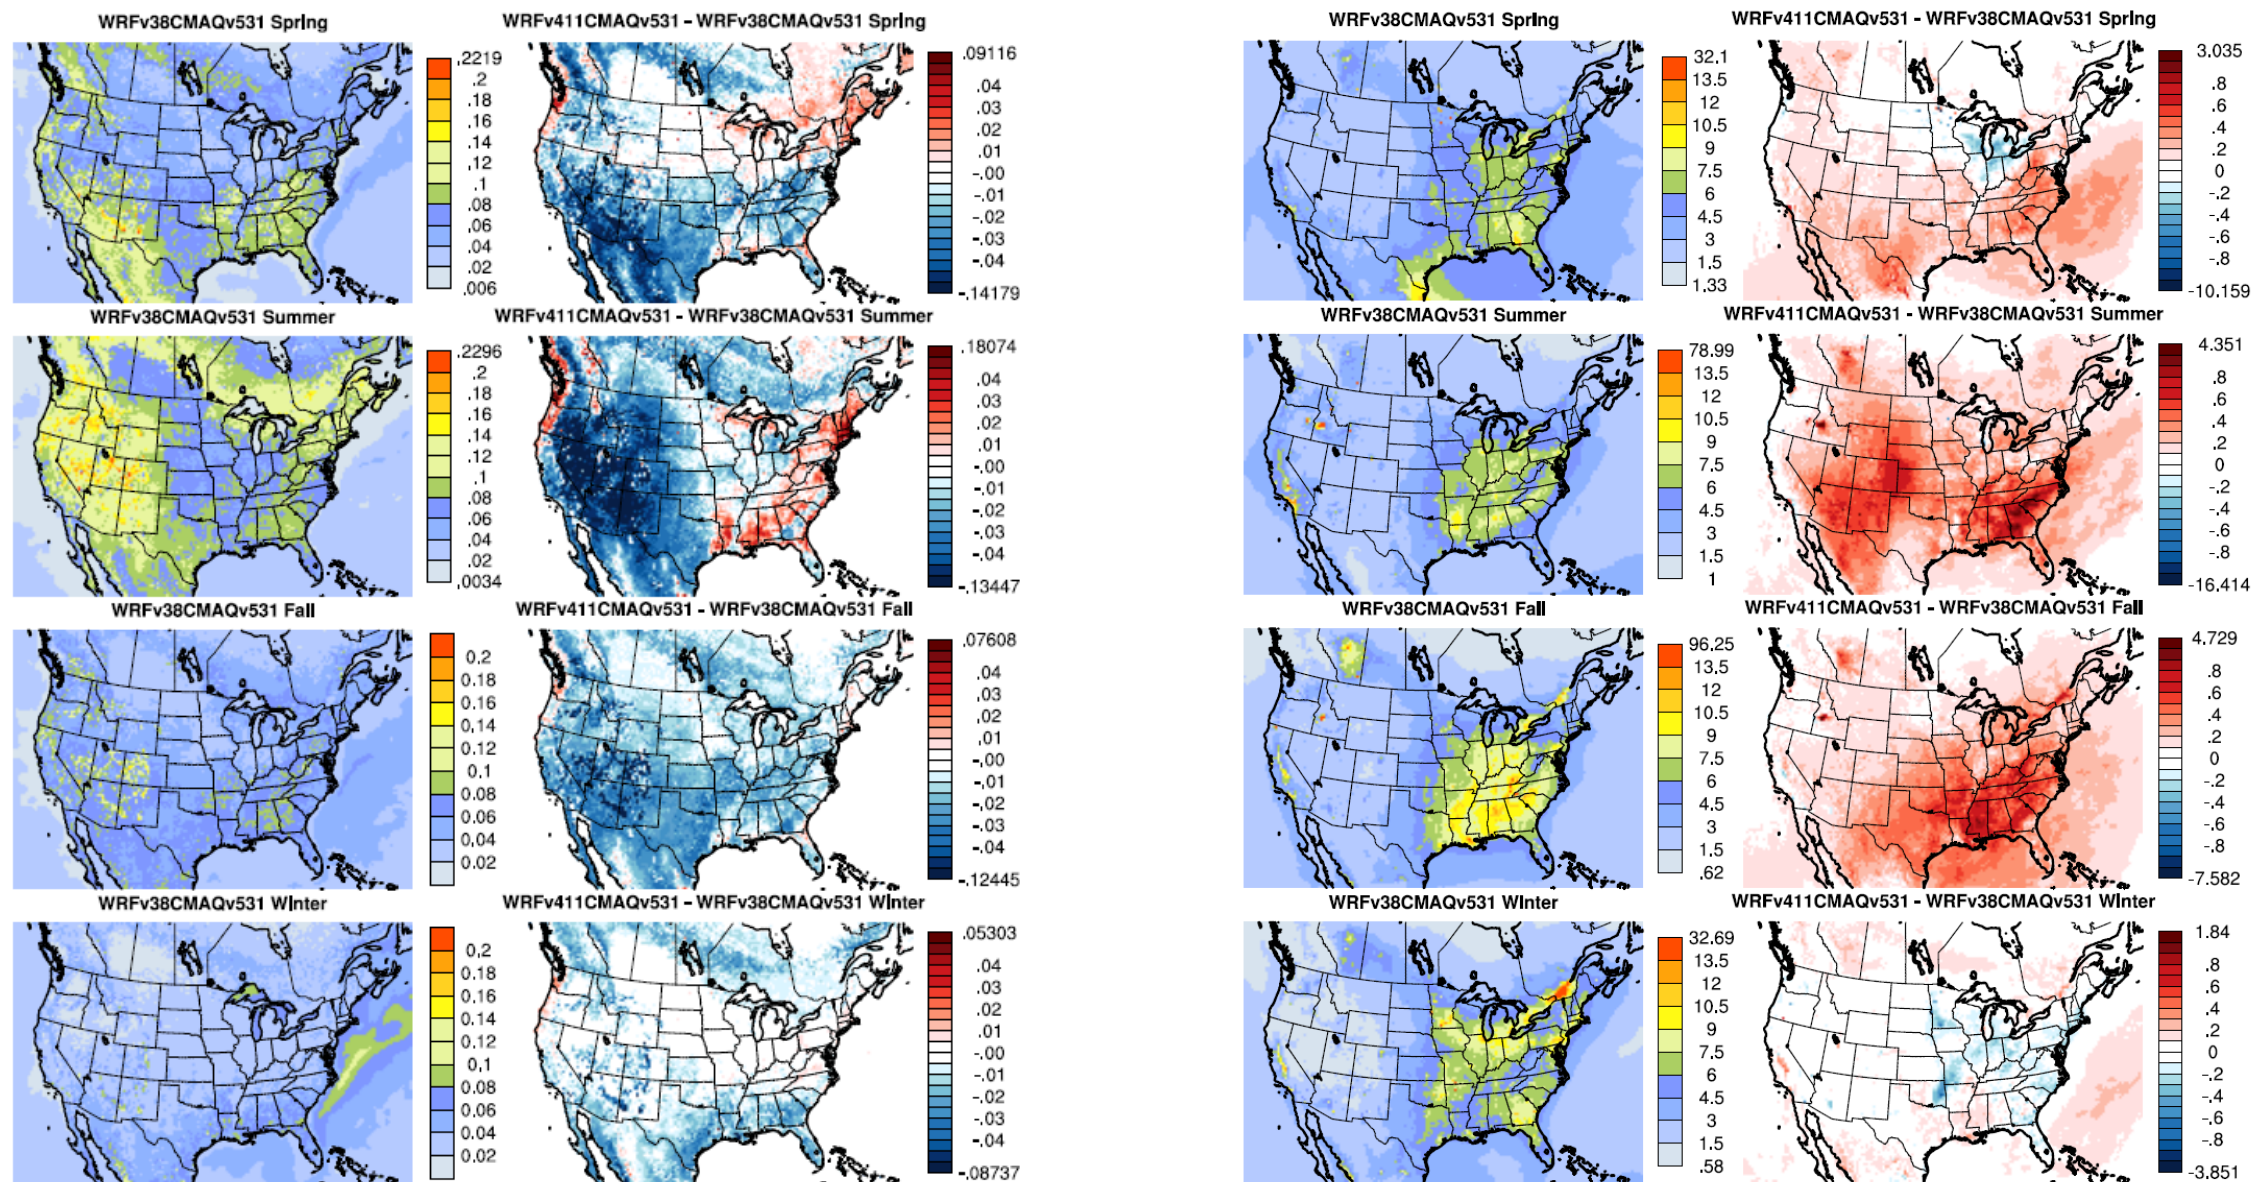

Figure S62. Seasonal accumulation mode deposition velocity (VMASSJ; cm s<sup>-1</sup>; left) and PM<sub>2.5</sub> concentration (μg m<sup>-3</sup>) for the CMAQ531\_WRF38\_M3Dry\_BiDi simulation along with the difference in VMASSJ and PM<sub>2.5</sub> concentration between the CMAQ531\_WRF38\_M3Dry\_BiDi and CMAQ531\_WRF411\_M3Dry\_BiDi simulations (WRF411 - WRF38).



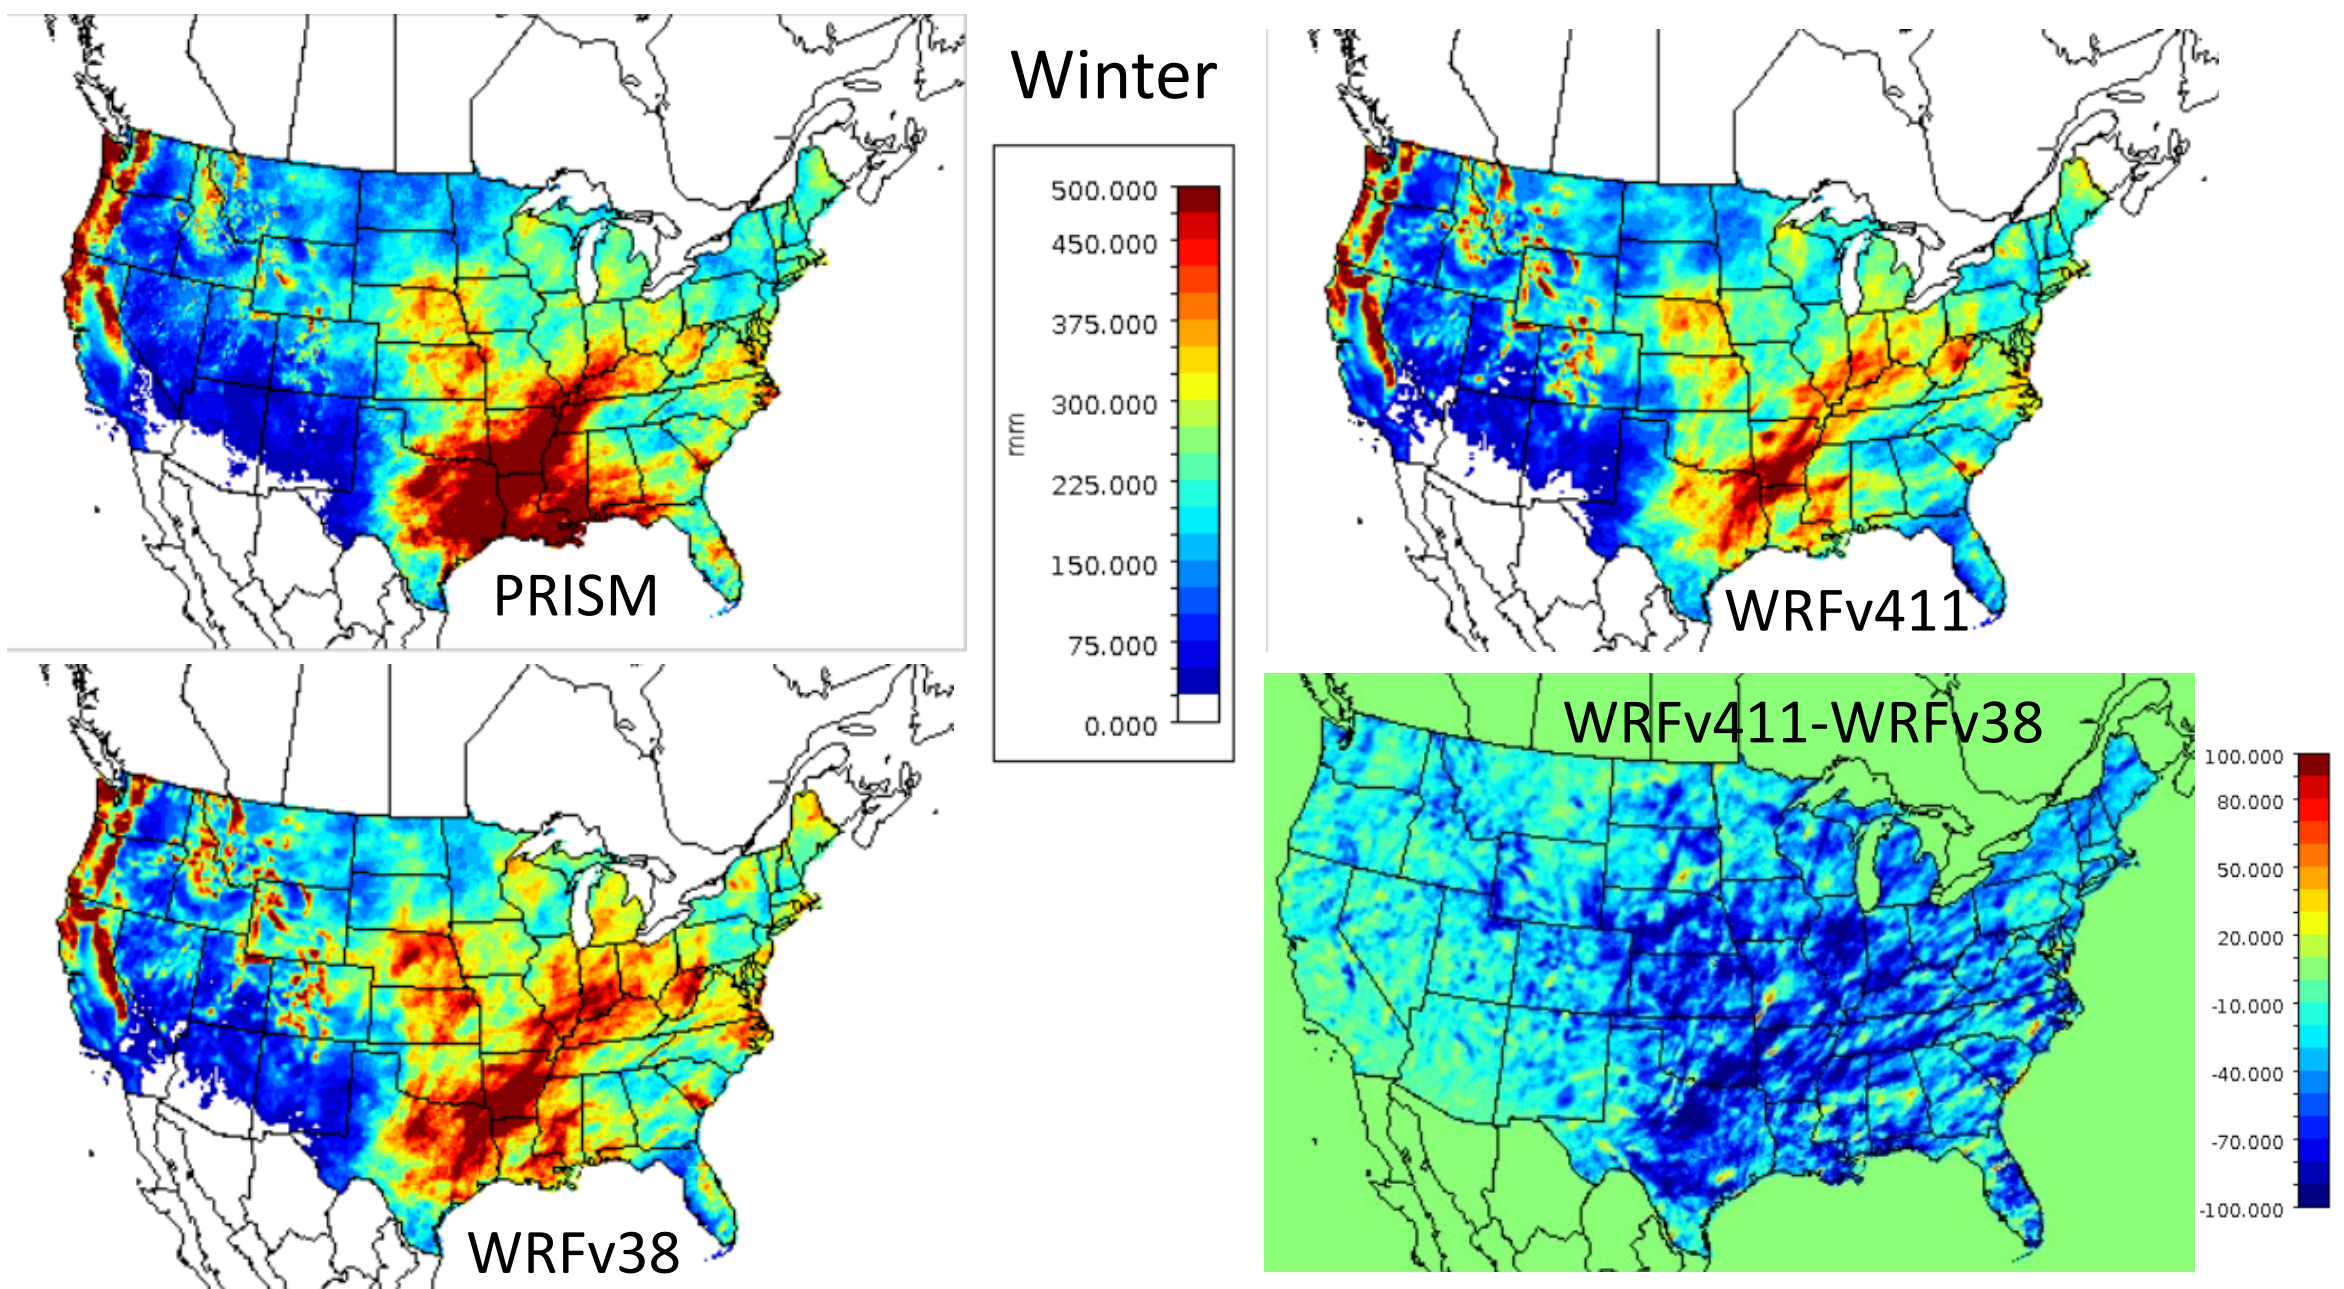

Figure S63. Observed and WRF simulated precipitation for winter 2006 in mm. Observed precipitation from PRISM (upper left), WRFv411 simulated precipitation (upper right), WRFv38 simulated precipitation (lower left), and the difference between WRFv411 and WRFv38 (WRFv411 – WRFv38) precipitation (lower right).



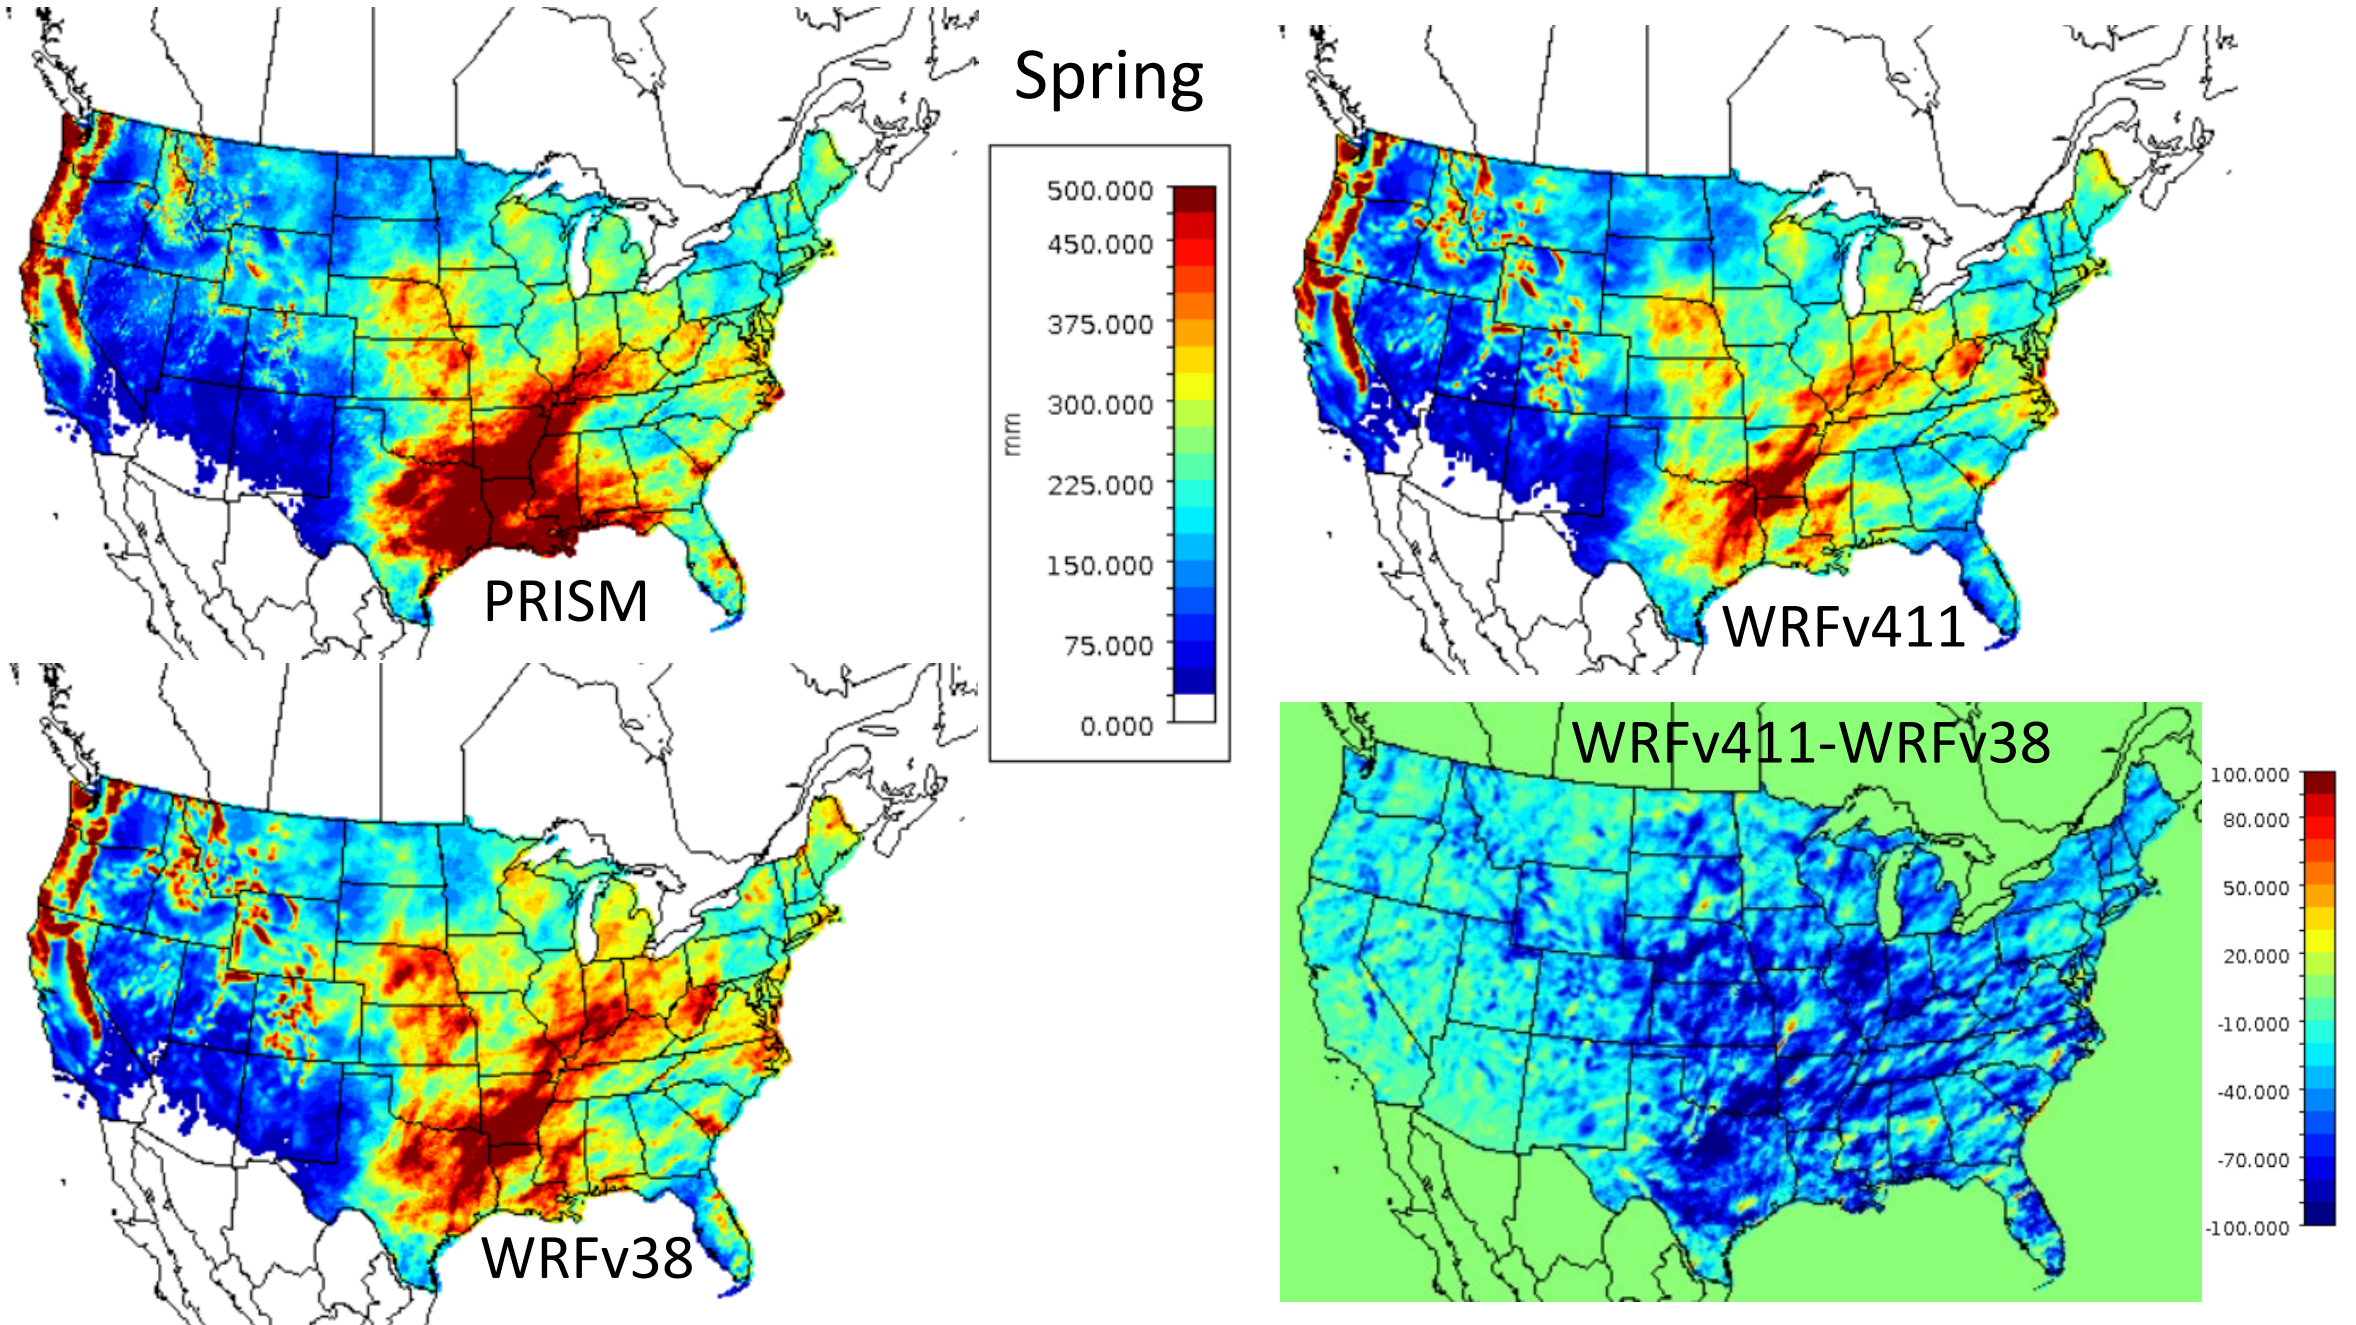

Figure S64. Observed and WRF simulated precipitation for spring 2006 in mm. Observed precipitation from PRISM (upper left), WRFv411 simulated precipitation (upper right), WRFv38 simulated precipitation (lower left), and the difference between WRFv411 and WRFv38 ( $\text{WRFv411} - \text{WRFv38}$ ) precipitation (lower right).



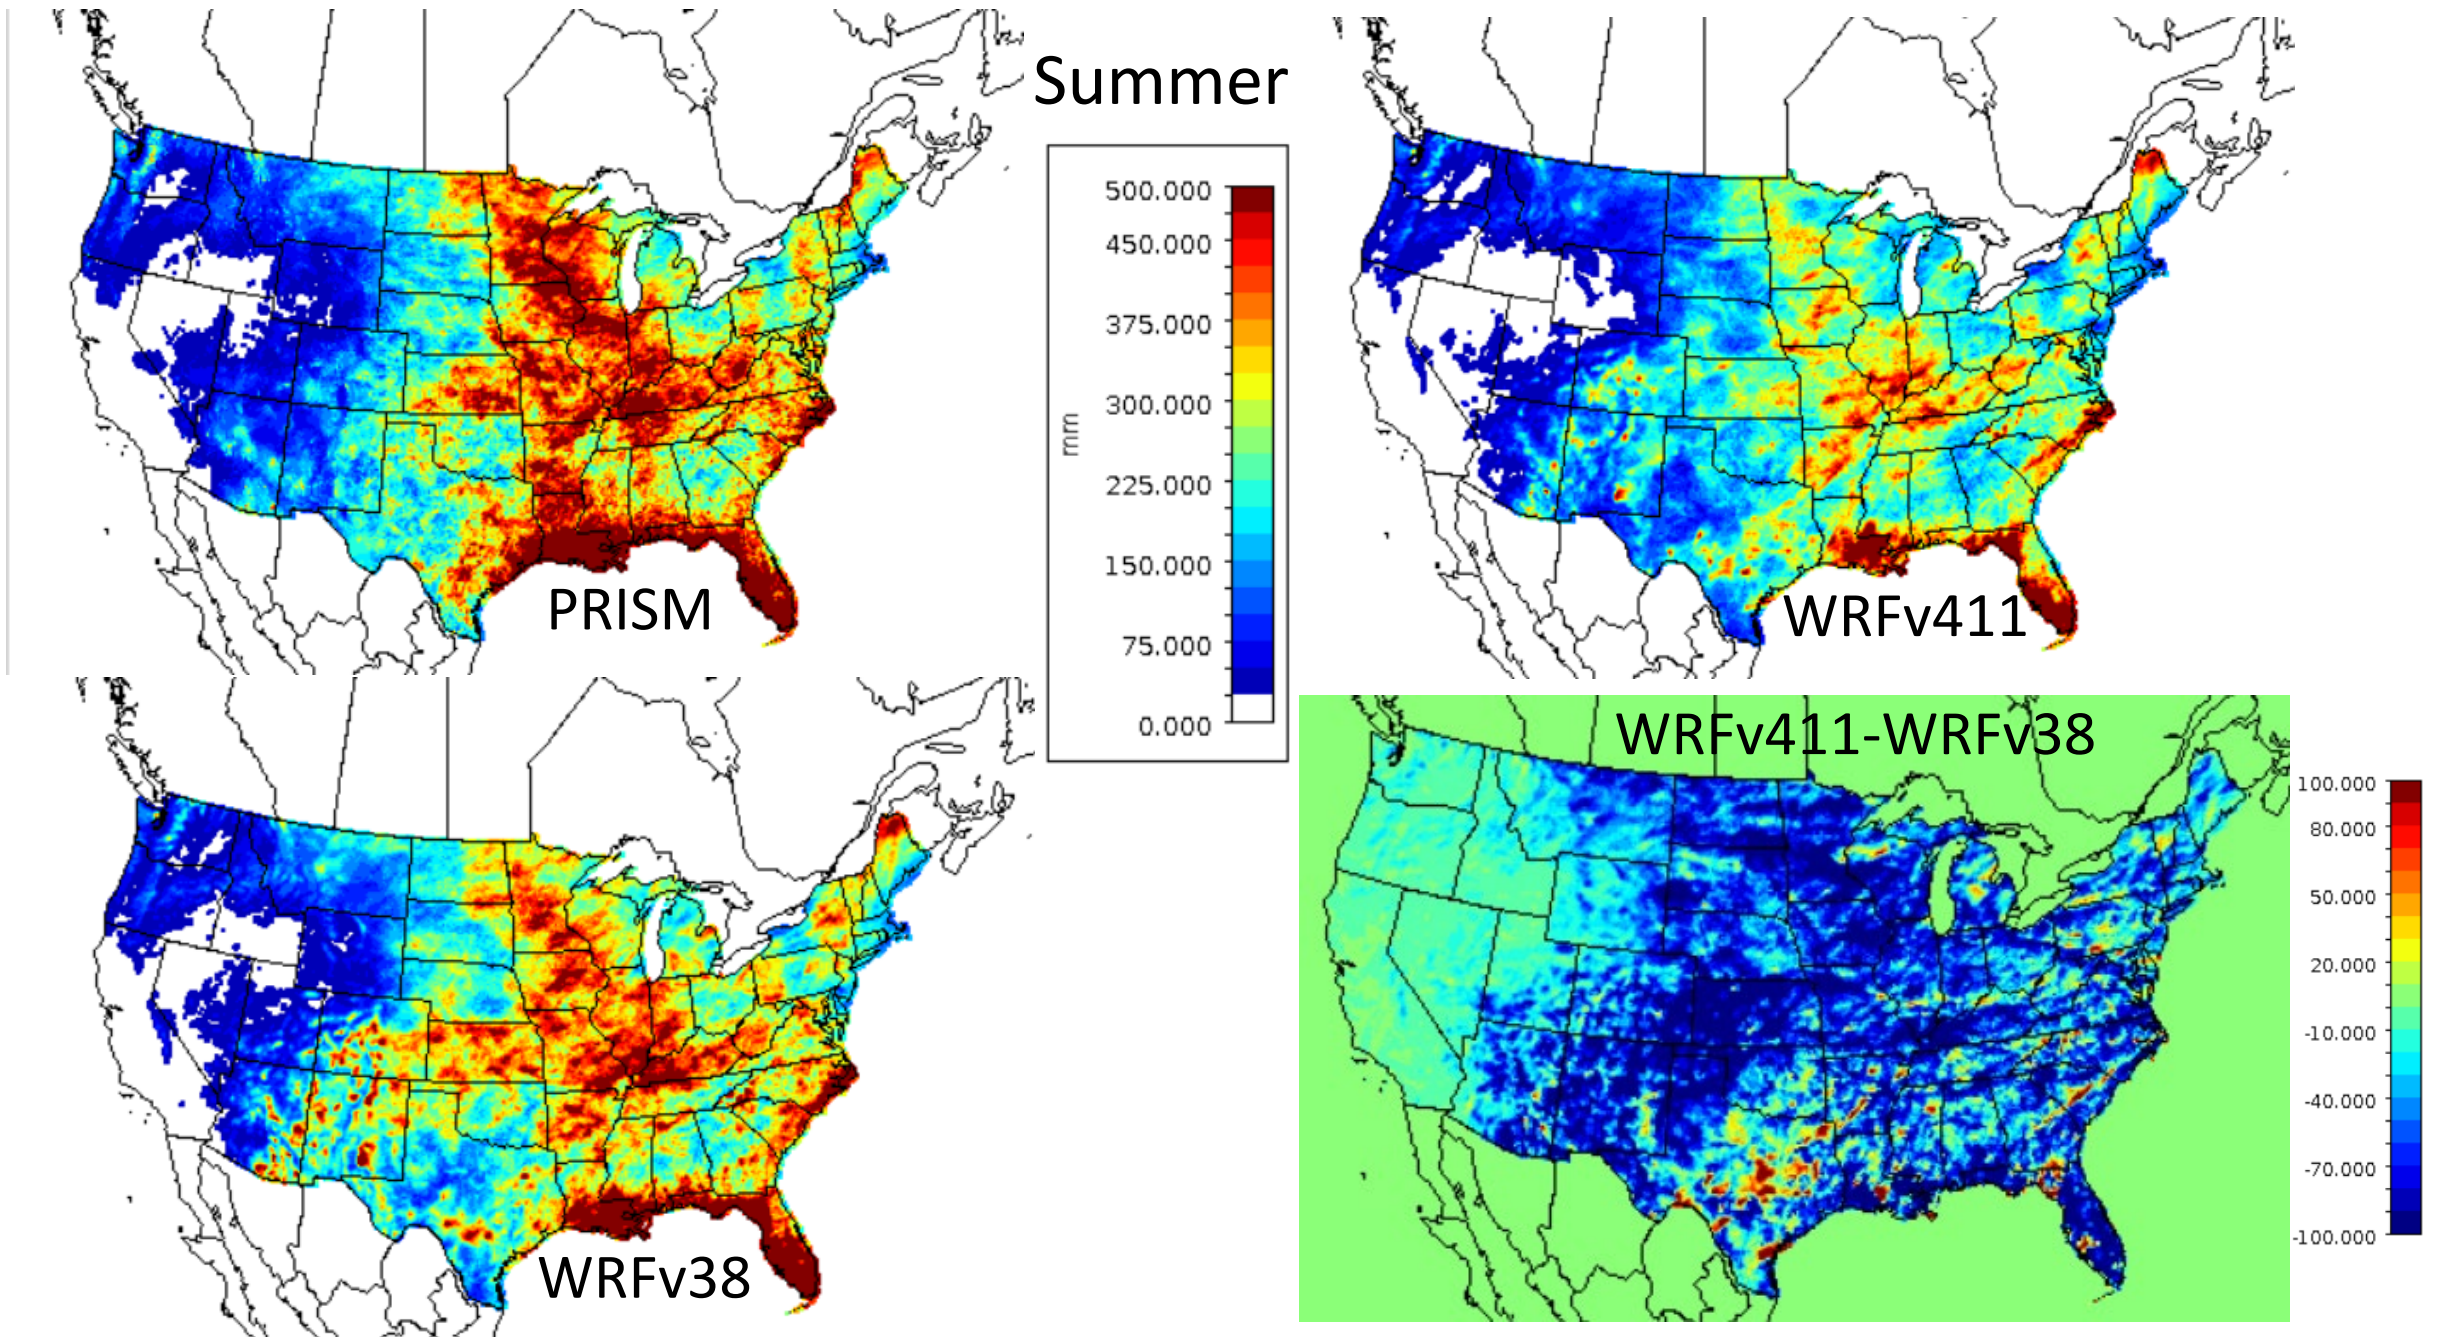

Figure S65. Observed and WRF simulated precipitation for summer 2006 in mm. Observed precipitation from PRISM (upper left), WRFv411 simulated precipitation (upper right), WRFv38 simulated precipitation (lower left), and the difference between WRFv411 and WRFv38 (WRFv411 – WRFv38) precipitation (lower right).



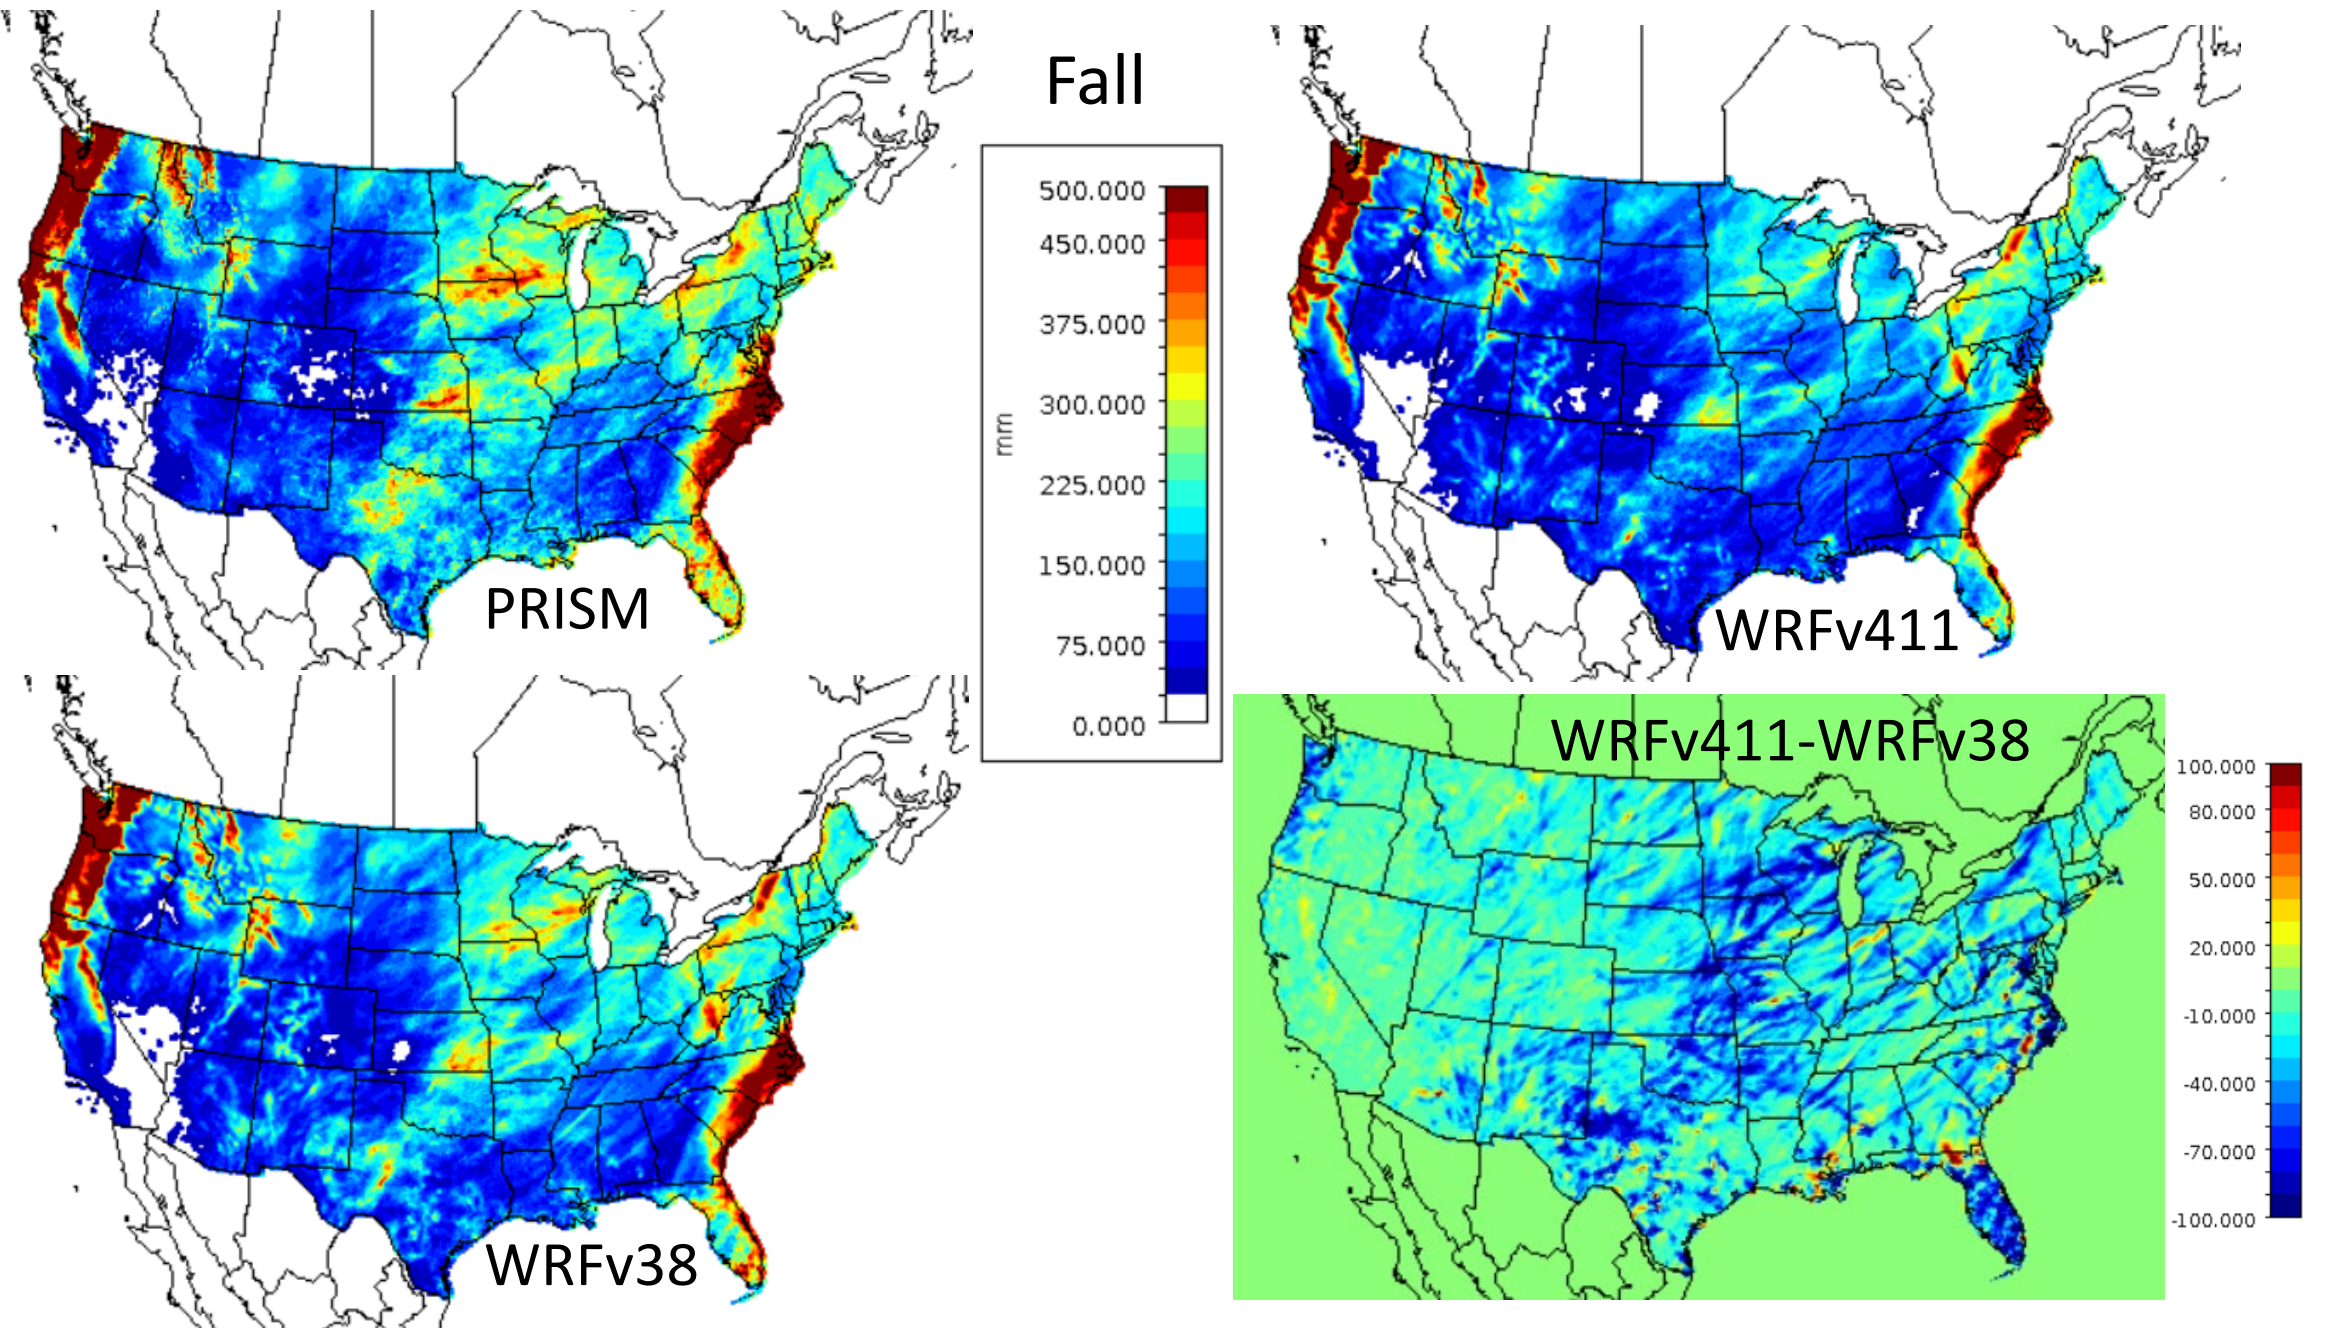

Figure S66. Observed and WRF simulated precipitation for fall 2006 in mm. Observed precipitation from PRISM (upper left), WRFv411 simulated precipitation (upper right), WRFv38 simulated precipitation (lower left), and the difference between WRFv411 and WRFv38 (WRFv411 – WRFv38) precipitation (lower right).
